# Supplementary material for: Synthetic Study of Natural Metabolites Containing a Benzo[c]oxepine Skeleton: Heterocornol C and D
Source: MDPI journal article supplement (doi:10.3390/ijms241210331), 2023-06-19
Supplement: s1 [file s1]

## Supporting information – NMR spectra, HPLC analysis and crystal data for *ent*-17a

### Synthetic Study of Natural Metabolites Containing a Benzo[*c*]oxepine Skeleton: Heterocornol C and D

*Ján Gettler,<sup>†</sup> Tomáš Čarný,<sup>†</sup> Martin Markovič,<sup>\*‡</sup> Peter Koóš,<sup>\*‡</sup> Erika Samolová,<sup>#</sup>  
Ján Moncol<sup>§</sup> and Tibor Gracza<sup>†</sup>*

<sup>†</sup>Department of Organic Chemistry, Institute of Organic Chemistry, Catalysis and Petrochemistry, Slovak University of Technology, Radlinského 9, SK-812 37 Bratislava, Slovakia

<sup>‡</sup> Georganics Ltd., Koreničova 1, SK-811 03 Bratislava, Slovakia

<sup>#</sup> Institute of Physics of the Czech Academy of Science, Na Slovance 2, 182 21 Prague 8, Czech Republic

<sup>§</sup>Department of Inorganic Chemistry, Institute of Inorganic Chemistry, Technology and Materials, Slovak University of Technology, Radlinského 9, SK-812 37 Bratislava, Slovakia

## Table of Content

### *ORTEP like representation and crystal data for the molecular structures*

|                                                                                           |    |
|-------------------------------------------------------------------------------------------|----|
| <b>Figure S1.</b> ORTEP like representation of <i>ent-17a</i> .....                       | S4 |
| <b>Figure S2.</b> A ball-and-stick view of crystal structure of <i>ent-17a</i> .....      | S4 |
| <b>Figure S3.</b> Crystal structure of <i>ent-17a</i> showing C–H···O hydrogen bonds..... | S5 |
| <b>Crystal data</b> for <i>ent-17a</i> .....                                              | S5 |
| <b>Table S1.</b> Hydrogen Bonds for <i>ent-17a</i> (IAM).....                             | S5 |
| <b>Table S2.</b> Hydrogen Bonds for <i>ent-17a</i> (HAR).....                             | S6 |

### *Copies of <sup>1</sup>H and <sup>13</sup>C NMR spectra*

|                                                                                           |     |
|-------------------------------------------------------------------------------------------|-----|
| <b>Table S3.</b> Comparison of the NMR data of synthetic and natural heterocornol D ..... | S7  |
| <b>Table S4.</b> Comparison of the NMR data of synthetic and natural heterocornol C ..... | S8  |
| <b>Figure S4.</b> <sup>1</sup> H NMR spectrum of <b>8</b> .....                           | S9  |
| <b>Figure S5.</b> <sup>13</sup> C NMR spectrum of <b>8</b> .....                          | S10 |
| <b>Figure S6.</b> <sup>1</sup> H NMR spectrum of <b>10</b> .....                          | S11 |
| <b>Figure S7.</b> <sup>13</sup> C NMR spectrum of <b>10</b> .....                         | S12 |
| <b>Figure S8.</b> <sup>1</sup> H NMR spectrum of <i>ent-10</i> .....                      | S13 |
| <b>Figure S9.</b> <sup>13</sup> C NMR spectrum of <i>ent-10</i> .....                     | S14 |
| <b>Figure S10.</b> <sup>1</sup> H NMR spectrum of <b>11</b> .....                         | S15 |
| <b>Figure S11.</b> <sup>13</sup> C NMR spectrum of <b>11</b> .....                        | S16 |
| <b>Figure S12.</b> <sup>1</sup> H NMR spectrum of <i>ent-11</i> .....                     | S17 |
| <b>Figure S13.</b> <sup>13</sup> C NMR spectrum of <i>ent-11</i> .....                    | S18 |
| <b>Figure S14.</b> <sup>1</sup> H NMR spectrum of <b>12</b> .....                         | S19 |
| <b>Figure S15.</b> <sup>13</sup> C NMR spectrum of <b>12</b> .....                        | S20 |
| <b>Figure S16.</b> <sup>1</sup> H NMR spectrum of <i>ent-12</i> .....                     | S21 |
| <b>Figure S17.</b> <sup>13</sup> C NMR spectrum of <i>ent-12</i> .....                    | S22 |
| <b>Figure S18.</b> <sup>1</sup> H NMR spectrum of <b>13</b> .....                         | S23 |
| <b>Figure S19.</b> <sup>13</sup> C NMR spectrum of <b>13</b> .....                        | S24 |
| <b>Figure S20.</b> <sup>1</sup> H NMR spectrum of <i>ent-13</i> .....                     | S25 |
| <b>Figure S21.</b> <sup>13</sup> C NMR spectrum of <i>ent-13</i> .....                    | S26 |
| <b>Figure S22.</b> <sup>1</sup> H NMR spectrum of <b>14a</b> .....                        | S27 |
| <b>Figure S23.</b> <sup>13</sup> C NMR spectrum of <b>14a</b> .....                       | S28 |
| <b>Figure S24.</b> <sup>1</sup> H NMR spectrum of <i>ent-14a</i> .....                    | S29 |
| <b>Figure S25.</b> <sup>13</sup> C NMR spectrum of <i>ent-14a</i> .....                   | S30 |
| <b>Figure S26.</b> <sup>1</sup> H NMR spectrum of <b>15</b> .....                         | S31 |
| <b>Figure S27.</b> <sup>13</sup> C NMR spectrum of <b>15</b> .....                        | S32 |
| <b>Figure S28.</b> <sup>1</sup> H NMR spectrum of <i>ent-15</i> .....                     | S33 |
| <b>Figure S29.</b> <sup>13</sup> C NMR spectrum of <i>ent-15</i> .....                    | S34 |
| <b>Figure S30.</b> <sup>1</sup> H NMR spectrum of <b>14b</b> .....                        | S35 |
| <b>Figure S31.</b> <sup>13</sup> C NMR spectrum of <b>14b</b> .....                       | S36 |
| <b>Figure S32.</b> <sup>1</sup> H NMR spectrum of <i>ent-14b</i> .....                    | S37 |
| <b>Figure S33.</b> <sup>13</sup> C NMR spectrum of <i>ent-14b</i> .....                   | S38 |
| <b>Figure S34.</b> <sup>1</sup> H NMR spectrum of <b>16a</b> .....                        | S39 |
| <b>Figure S35.</b> <sup>13</sup> C NMR spectrum of <b>16a</b> .....                       | S40 |

|                                                                                                      |     |
|------------------------------------------------------------------------------------------------------|-----|
| <b>Figure S36.</b> $^1\text{H}$ NMR spectrum of <i>ent</i> - <b>16a</b> .....                        | S41 |
| <b>Figure S37.</b> $^{13}\text{C}$ NMR spectrum of <i>ent</i> - <b>16a</b> .....                     | S42 |
| <b>Figure S38.</b> $^1\text{H}$ NMR spectrum of <b>16b</b> .....                                     | S43 |
| <b>Figure S39.</b> $^{13}\text{C}$ NMR spectrum of <b>16b</b> .....                                  | S44 |
| <b>Figure S40.</b> $^1\text{H}$ NMR spectrum of <i>ent</i> - <b>16b</b> .....                        | S45 |
| <b>Figure S41.</b> $^{13}\text{C}$ NMR spectrum of <i>ent</i> - <b>16b</b> .....                     | S46 |
| <b>Figure S42.</b> $^1\text{H}$ NMR spectrum of <b>17a</b> .....                                     | S47 |
| <b>Figure S43.</b> $^{13}\text{C}$ NMR spectrum of <b>17a</b> .....                                  | S48 |
| <b>Figure S44.</b> $^1\text{H}$ NMR spectrum of <i>ent</i> - <b>17a</b> .....                        | S49 |
| <b>Figure S45.</b> $^{13}\text{C}$ NMR spectrum of <i>ent</i> - <b>17a</b> .....                     | S50 |
| <b>Figure S46.</b> $^1\text{H}$ NMR spectrum of <b>17b</b> .....                                     | S51 |
| <b>Figure S47.</b> $^{13}\text{C}$ NMR spectrum of <b>17b</b> .....                                  | S52 |
| <b>Figure S48.</b> $^1\text{H}$ NMR spectrum of <i>ent</i> - <b>17b</b> .....                        | S53 |
| <b>Figure S49.</b> $^{13}\text{C}$ NMR spectrum of <i>ent</i> - <b>17b</b> .....                     | S54 |
| <b>Figure S50.</b> $^1\text{H}$ NMR spectrum of <b>3a</b> in $\text{CDCl}_3$ .....                   | S55 |
| <b>Figure S51.</b> $^{13}\text{C}$ NMR spectrum of <b>3a</b> in $\text{CDCl}_3$ .....                | S56 |
| <b>Figure S52.</b> $^1\text{H}$ NMR spectrum of <b>3a</b> in $\text{MeOH-d}_4$ .....                 | S57 |
| <b>Figure S53.</b> $^{13}\text{C}$ NMR spectrum of <b>3a</b> in $\text{MeOH-d}_4$ .....              | S58 |
| <b>Figure S54.</b> $^1\text{H}$ NMR spectrum of <i>ent</i> - <b>3a</b> in $\text{CDCl}_3$ .....      | S59 |
| <b>Figure S55.</b> $^{13}\text{C}$ NMR spectrum of <i>ent</i> - <b>3a</b> in $\text{CDCl}_3$ .....   | S60 |
| <b>Figure S56.</b> $^1\text{H}$ NMR spectrum of <i>ent</i> - <b>3a</b> in $\text{MeOH-d}_4$ .....    | S61 |
| <b>Figure S57.</b> $^{13}\text{C}$ NMR spectrum of <i>ent</i> - <b>3a</b> in $\text{MeOH-d}_4$ ..... | S62 |
| <b>Figure S58.</b> $^1\text{H}$ NMR spectrum of <b>3b</b> in $\text{CDCl}_3$ .....                   | S63 |
| <b>Figure S59.</b> $^{13}\text{C}$ NMR spectrum of <b>3b</b> in $\text{CDCl}_3$ .....                | S64 |
| <b>Figure S60.</b> $^1\text{H}$ NMR spectrum of <b>3b</b> in $\text{MeOH-d}_4$ .....                 | S65 |
| <b>Figure S61.</b> $^{13}\text{C}$ NMR spectrum of <b>3b</b> in $\text{MeOH-d}_4$ .....              | S66 |
| <b>Figure S62.</b> $^1\text{H}$ NMR spectrum of <i>ent</i> - <b>3b</b> in $\text{CDCl}_3$ .....      | S67 |
| <b>Figure S63.</b> $^{13}\text{C}$ NMR spectrum of <i>ent</i> - <b>3b</b> in $\text{CDCl}_3$ .....   | S68 |
| <b>Figure S64.</b> $^1\text{H}$ , NMR spectrum of <i>ent</i> - <b>3b</b> in $\text{MeOH-d}_4$ .....  | S69 |
| <b>Figure S65.</b> $^{13}\text{C}$ NMR spectrum of <i>ent</i> - <b>3b</b> in $\text{MeOH-d}_4$ ..... | S70 |
| <b>Figure S66.</b> $^1\text{H}$ NMR spectrum of <b>1</b> .....                                       | S71 |
| <b>Figure S67.</b> $^{13}\text{C}$ NMR spectrum of <b>1</b> .....                                    | S72 |
| <b>Figure S68.</b> $^1\text{H}$ , NMR spectrum of <b>18</b> .....                                    | S73 |
| <b>Figure S69.</b> $^{13}\text{C}$ NMR spectrum of <b>18</b> .....                                   | S74 |

#### *HPLC analysis of 3a and 3b.*

|                                                                                   |     |
|-----------------------------------------------------------------------------------|-----|
| <b>HPLC Analytical method</b> .....                                               | S75 |
| <b>Figure S70.</b> <i>HPLC analysis of a mixture of 3a and ent-3a</i> .....       | S76 |
| <b>Figure S71.</b> <i>HPLC analysis of synthetic 3a</i> .....                     | S77 |
| <b>Figure S72.</b> <i>HPLC analysis of racemic mixture of 3b and ent-3b</i> ..... | S78 |
| <b>Figure S73.</b> <i>HPLC analysis of synthetic 3b</i> .....                     | S79 |

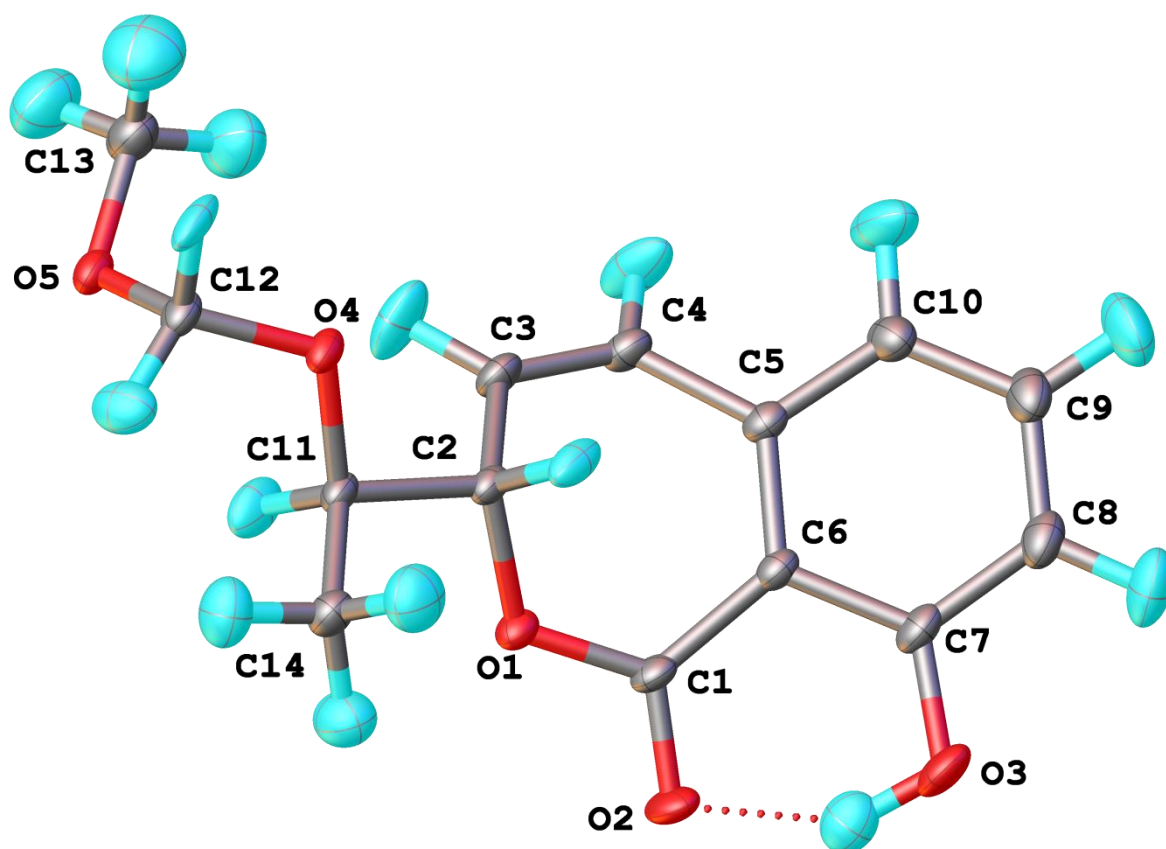

**Figure S1.** An ORTEP view of *ent*-17a showing the atom-numbering scheme of non-hydrogen atoms. Displacement ellipsoids are plotted at the 50% probability level.

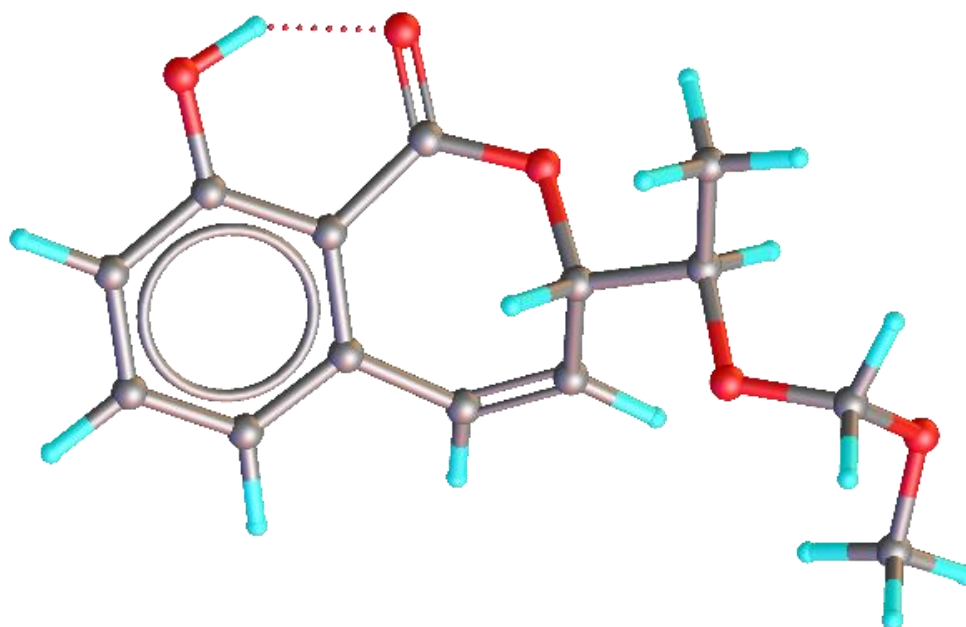

**Figure S2.** A ball-and-stick view of crystal structure of *ent*-17a.



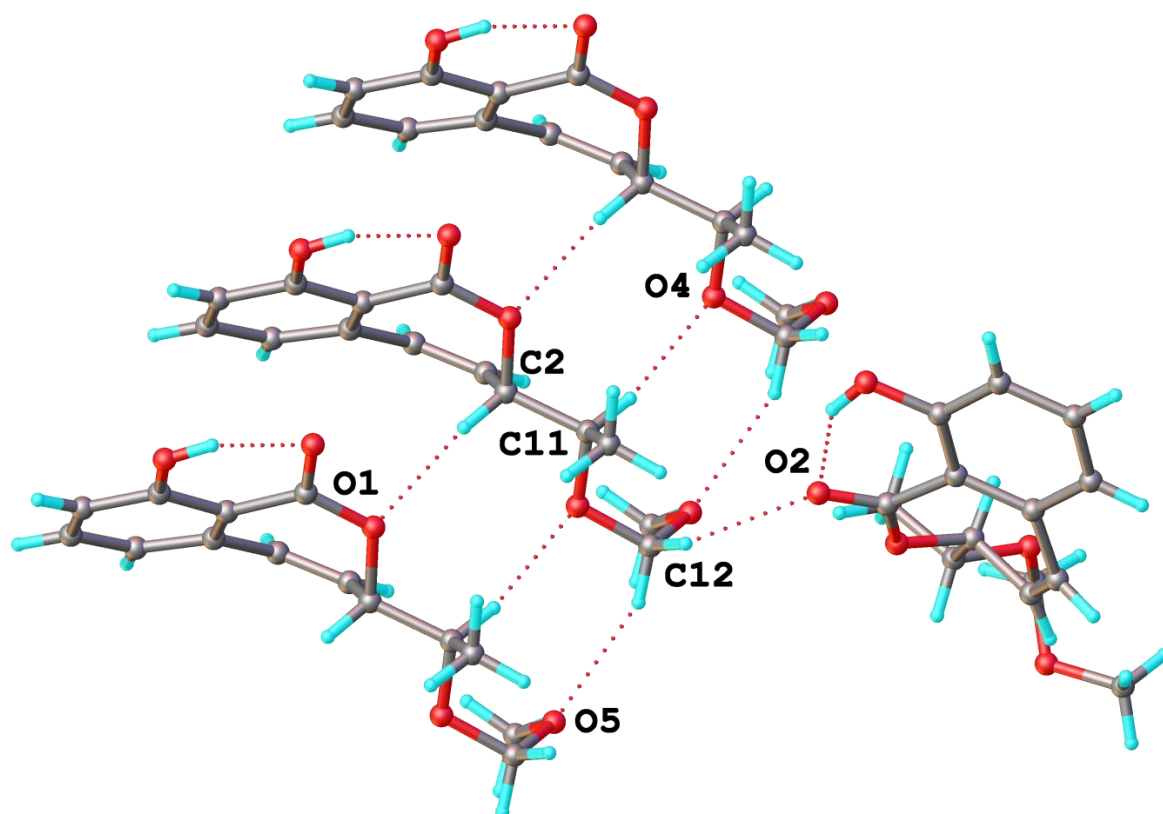

**Figure S3.** Crystal structure of *ent*-17a showing C–H···O hydrogen bonds.

**Crystal Data** for *ent*-17a: C<sub>14</sub>H<sub>16</sub>O<sub>5</sub> (*M* = 264.27 g/mol): monoclinic, space group *P*2<sub>1</sub> (no. 4), *a* = 4.27815(5) Å, *b* = 12.64187(14) Å, *c* = 11.93812(17) Å,  $\beta$  = 98.3328(15)°, *V* = 638.843(17) Å<sup>3</sup>, *Z* = 2, *T* = 95 K,  $\mu$ (CuK $\alpha$ ) = 0.873 mm<sup>−1</sup>, *D*<sub>calc</sub> = 1.374 g/cm<sup>3</sup>, 12519 reflections measured (7.484° ≤ 2 $\Theta$  ≤ 147.14°), 2520 unique (*R*<sub>int</sub> = 0.0377, *R*<sub>sigma</sub> = 0.0266) which were used in all calculations. IAM: The final *R*<sub>1</sub> was 0.0269 (*I* > 2 $\sigma$ (*I*)) and *wR*<sub>2</sub> was 0.0675 (all data). CCDC no. 2222838. HAR: The final *R*<sub>1</sub> was 0.0184 (*I* > 2 $\sigma$ (*I*)) and *wR*<sub>2</sub> was 0.0404 (all data). CCDC no. 2222839. The Flack parameters for the IAM and HAR model have the value of *x* = 0.01(7) and 0.07(7), respectively. The Hooft parameter has a value of *y* = 0.04(6) for both models.

**Table S1.** Hydrogen Bonds for *ent*-17a (IAM).

| D   | H    | A               | d(D-H)/Å | d(H-A)/Å   | d(D-A)/Å   | D-H-A/°    |
|-----|------|-----------------|----------|------------|------------|------------|
| O3  | H3   | O2              | 0.8400   | 1.8161(17) | 2.5503(15) | 145.03(13) |
| C11 | H11  | O4 <sup>1</sup> | 1.0000   | 2.4857(17) | 3.4719(17) | 168.75(3)  |
| C2  | H2   | O1 <sup>2</sup> | 1.0000   | 2.5860(16) | 3.5763(16) | 170.62(4)  |
| C12 | H12a | O5 <sup>2</sup> | 0.9900   | 2.4544(16) | 3.3739(16) | 154.31(3)  |
| C12 | H12b | O2 <sup>3</sup> | 0.9900   | 2.5997(16) | 3.4750(17) | 147.41(4)  |

<sup>1</sup>-1+*X*,+*Y*,+*Z*; <sup>2</sup>1+*X*,+*Y*,+*Z*; <sup>3</sup>1-*X*,1/2+*Y*,1-*Z*

**Table S2.** Hydrogen Bonds for *ent*-**17a** (HAR).

| D   | H    | A               | d(D-H)/Å | d(H-A)/Å  | d(D-A)/Å   | D-H-A/°   |
|-----|------|-----------------|----------|-----------|------------|-----------|
| O3  | H3   | O2              | 0.990(9) | 1.664(11) | 2.5451(11) | 145.9(13) |
| C11 | H11  | O4 <sup>1</sup> | 1.104(8) | 2.387(8)  | 3.4763(12) | 168.8(9)  |
| C2  | H2   | O1 <sup>2</sup> | 1.105(8) | 2.488(8)  | 3.5814(12) | 170.0(9)  |
| C12 | H12a | O5 <sup>2</sup> | 1.099(8) | 2.327(8)  | 3.3774(12) | 159.2(8)  |
| C12 | H12b | O2 <sup>3</sup> | 1.109(8) | 2.472(9)  | 3.4762(12) | 149.8(10) |

<sup>1</sup>-1+X,+Y,+Z; <sup>2</sup>1+X,+Y,+Z; <sup>3</sup>1-X,1/2+Y,1-Z

**Table S3.** Comparison of the NMR data of synthetic and natural heterocornol D.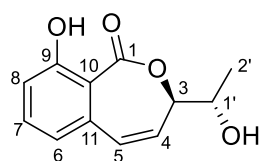

heterocornol D

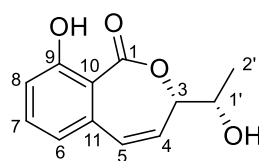diastereoisomer (**3b**)

| position | natural<br>(Lei et al. <sup>8</sup> ) | synthetic                                                         |                                                                |
|----------|---------------------------------------|-------------------------------------------------------------------|----------------------------------------------------------------|
|          | $\delta_{\text{H}}$ (m, $J$ [Hz])     | heterocornol D ( <b>3a</b> )<br>$\delta_{\text{H}}$ (m, $J$ [Hz]) | diastereoisomer <b>3b</b><br>$\delta_{\text{H}}$ (m, $J$ [Hz]) |
| 1        | -                                     | -                                                                 | -                                                              |
| 3        | 4.45 (brt, 5.8)                       | 4.46 (ddd, 5.8, 4.7, 1.8)                                         | 4.46 (td, 5.8, 1.7)                                            |
| 4        | 6.42 (dd, 10.3, 5.8)                  | 6.41 (dd, 10.4, 5.8)                                              | 6.34 (dd, 10.3, 5.9)                                           |
| 5        | 6.97 (brd, 10.3)                      | 6.98 (brd, 10.4)                                                  | 6.95 (brd, 10.4)                                               |
| 6        | 6.88 (d, 8.1)                         | 6.88 (d, 7.6)                                                     | 6.88 (d, $J = 7.5$ )                                           |
| 7        | 7.45 (t, 7.9)                         | 7.45 (t, 7.9)                                                     | 7.45 (t, 7.9)                                                  |
| 8        | 6.97 (d, 7.9)                         | 6.98 – 6.96 (m)                                                   | 6.97 (dd, 8.2, 1.1)                                            |
| 9        | -                                     | -                                                                 | -                                                              |
| 10       | -                                     | -                                                                 | -                                                              |
| 11       | -                                     | -                                                                 | -                                                              |
| 1'       | 4.08 (m)                              | 4.10 – 4.05 (m)                                                   | 4.06 (quint., 6.4)                                             |
| 2'       | 1.27 (d, 6.4)                         | 1.27 (d, 6.5)                                                     | 1.28 (d, 6.5)                                                  |

| position | natural<br>(Lei et al. <sup>8</sup> ) | synthetic                                             |                                                  |
|----------|---------------------------------------|-------------------------------------------------------|--------------------------------------------------|
|          | $\delta_{\text{C}}$                   | heterocornol D ( <b>3a</b> )<br>$\delta_{\text{C}}^*$ | diastereoisomer <b>3b</b><br>$\delta_{\text{C}}$ |
| 1        | 171.0, C                              | 172.5                                                 | 172.5                                            |
| 3        | 77.5, CH                              | 79.0                                                  | 79.1                                             |
| 4        | 135.3, CH                             | 136.8                                                 | 136.8                                            |
| 5        | 129.7, CH                             | 131.2                                                 | 131.4                                            |
| 6        | 120.3, CH                             | 121.8                                                 | 121.8                                            |
| 7        | 133.2, CH                             | 134.7                                                 | 134.7                                            |
| 8        | 116.9, CH                             | 118.3                                                 | 118.4                                            |
| 9        | 160.3, C                              | 161.8                                                 | 161.8                                            |
| 10       | 115.0, C                              | 116.5                                                 | 116.5                                            |
| 11       | 136.9, C                              | 138.4                                                 | 138.3                                            |
| 1'       | 66.8, CH                              | 68.3                                                  | 68.1                                             |
| 2'       | 17.4, CH <sub>3</sub>                 | 18.8                                                  | 18.6                                             |

\* the difference of + 1.4 ppm in shifts for all signals compared to natural compound was caused by different locking of NMR spectra. The <sup>13</sup>C NMR spectrum of synthetic compound was locked to residual solvent peak (MeOH 49.00 ppm).

**Table S4.** Comparison of the NMR data of synthetic and natural heterocornol C.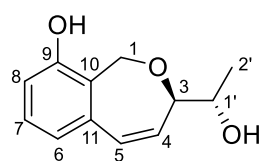

heterocornol C

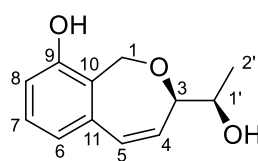diastereoisomer **18**

| position | natural<br>(Lei et al. <sup>8</sup> )  | synthetic                                                             |                                                                     |
|----------|----------------------------------------|-----------------------------------------------------------------------|---------------------------------------------------------------------|
|          | $\delta_{\text{H}}$ (m, <i>J</i> [Hz]) | heterocornol C ( <b>1</b> )<br>$\delta_{\text{H}}$ (m, <i>J</i> [Hz]) | diastereoisomer <b>18</b><br>$\delta_{\text{H}}$ (m, <i>J</i> [Hz]) |
| 1        | 5.23 (d, 13.7)                         | 5.23 (d, 13.8)                                                        | 5.25, (d, 13.8)                                                     |
| 3        | 4.35 (m)                               | 4.35 (dt, 5.0, 2.4)                                                   | 4.40 (dt, 5.0, 2.4)                                                 |
| 4        | 5.96, dd (12.4, 2.0)                   | 5.96 (dd, 12.4, 2.5)                                                  | 5.89 (dd, 12.5, 2.5)                                                |
| 5        | 6.50 (brd, 12.4)                       | 6.50 (dd, 12.5, 2.3)                                                  | 6.54 (dd, 12.5, 2.3)                                                |
| 6        | 6.72 (d, 7.5)                          | 6.72 (d, 7.5)                                                         | 6.73, d (7.5)                                                       |
| 7        | 7.02 (t, 7.5)                          | 7.03 (t, 7.8)                                                         | 7.03, t (7.8)                                                       |
| 8        | 6.66 (d, 7.5)                          | 6.67 (d, 8.1)                                                         | 6.67, d (8.1)                                                       |
| 9        | -                                      | -                                                                     | -                                                                   |
| 10       | 4.44 (d, 13.7)                         | 4.45 (d, 13.8)                                                        | 4.46, (d, 13.8)                                                     |
| 11       | -                                      | -                                                                     | -                                                                   |
| 1'       | 3.76 (m)                               | 3.77 (qd, 6.4, 5.3)                                                   | 3.85 (qd, 6.4, 5.3)                                                 |
| 2'       | 1.19 (d, 6.4)                          | 1.19 (d, 6.4)                                                         | 1.15 (d, 6.4)                                                       |

| position | natural<br>(Lei et al. <sup>8</sup> ) | synthetic                                            |                                                  |
|----------|---------------------------------------|------------------------------------------------------|--------------------------------------------------|
|          | $\delta_{\text{C}}$                   | heterocornol C ( <b>1</b> )<br>$\delta_{\text{C}}^*$ | diastereoisomer <b>18</b><br>$\delta_{\text{C}}$ |
| 1        | 63.5, CH <sub>2</sub>                 | 64.9, CH <sub>2</sub>                                | 64.8, CH <sub>2</sub>                            |
| 3        | 86.1, CH                              | 87.4, CH                                             | 87.3, CH                                         |
| 4        | 132.2, CH                             | 133.6, CH                                            | 133.0, CH                                        |
| 5        | 130.1, CH                             | 131.4, CH                                            | 132.1 CH                                         |
| 6        | 121.8, CH                             | 123.2, CH                                            | 123.1, CH                                        |
| 7        | 127.6, CH                             | 129.0, CH                                            | 129.0, CH                                        |
| 8        | 113.8, CH                             | 115.1, CH                                            | 115.2, CH                                        |
| 9        | 153.5, C                              | 154.9, C                                             | 155.1, C                                         |
| 10       | 125.7, C                              | 127.1, C                                             | 127.2, C                                         |
| 11       | 137.6, C                              | 139.0, C                                             | 139.0, C                                         |
| 1'       | 69.4, CH                              | 70.8, CH                                             | 70.3, CH                                         |
| 2'       | 17.7, CH <sub>3</sub>                 | 19.1, CH <sub>3</sub>                                | 18.7, CH <sub>3</sub>                            |

\* the difference of + 1.4 ppm in shifts for all signals compared to natural compound was caused by different locking of NMR spectra. The <sup>13</sup>C NMR spectrum of synthetic compound was locked to residual solvent peak (MeOH 49.00 ppm).

<sup>1</sup>H NMR (300MHz, CDCl<sub>3</sub>)

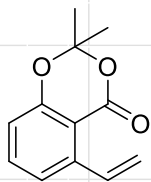

**8**

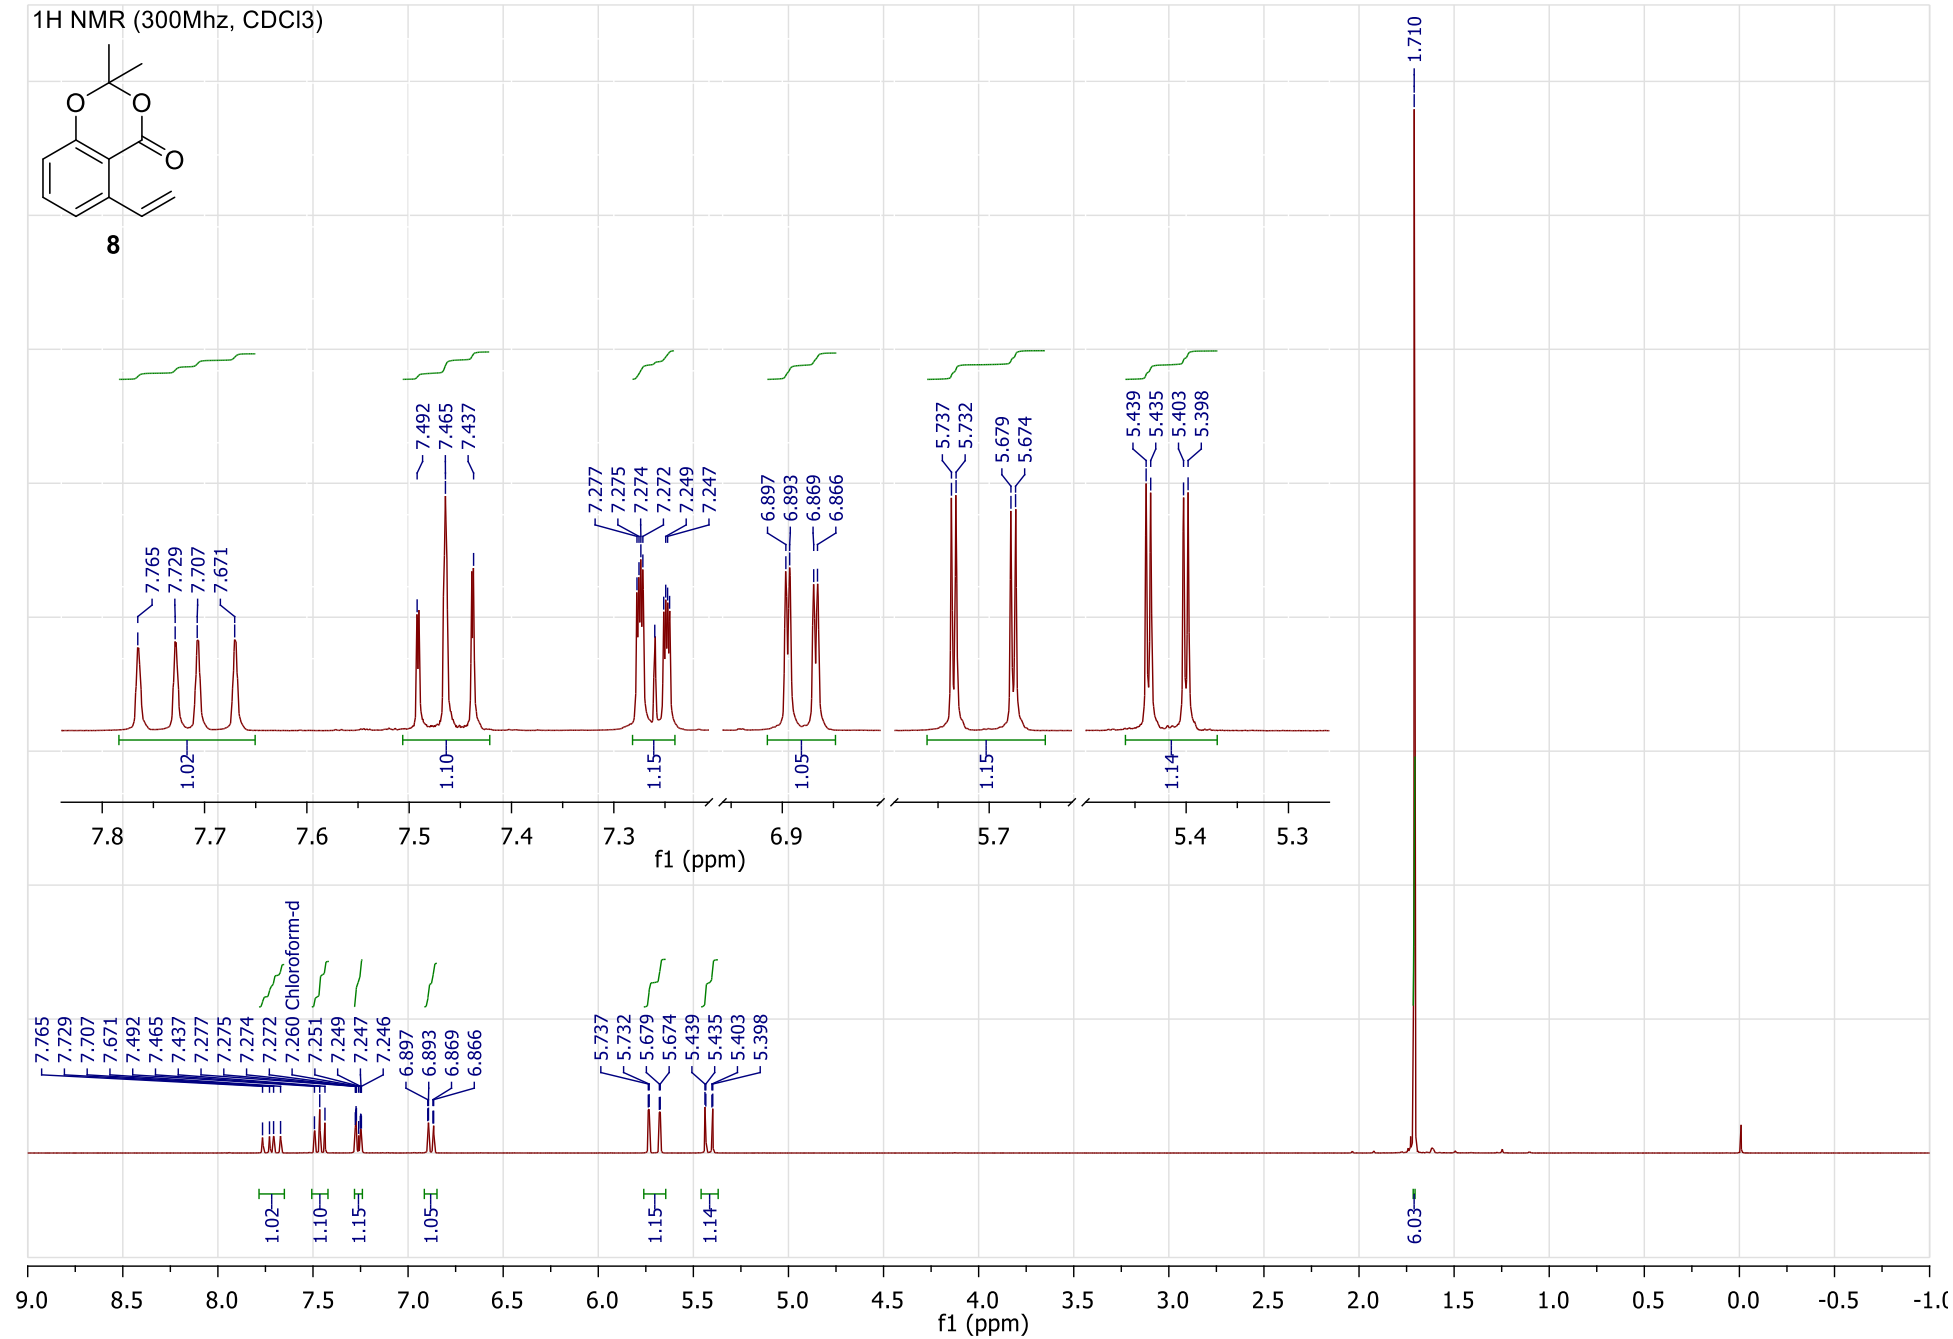

**Figure S4.** <sup>1</sup>H NMR spectrum of **8**.

$^{13}\text{C}\{^1\text{H}\}$  NMR (75 Mhz,  $\text{CDCl}_3$ )

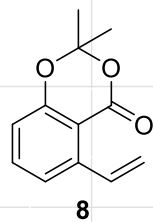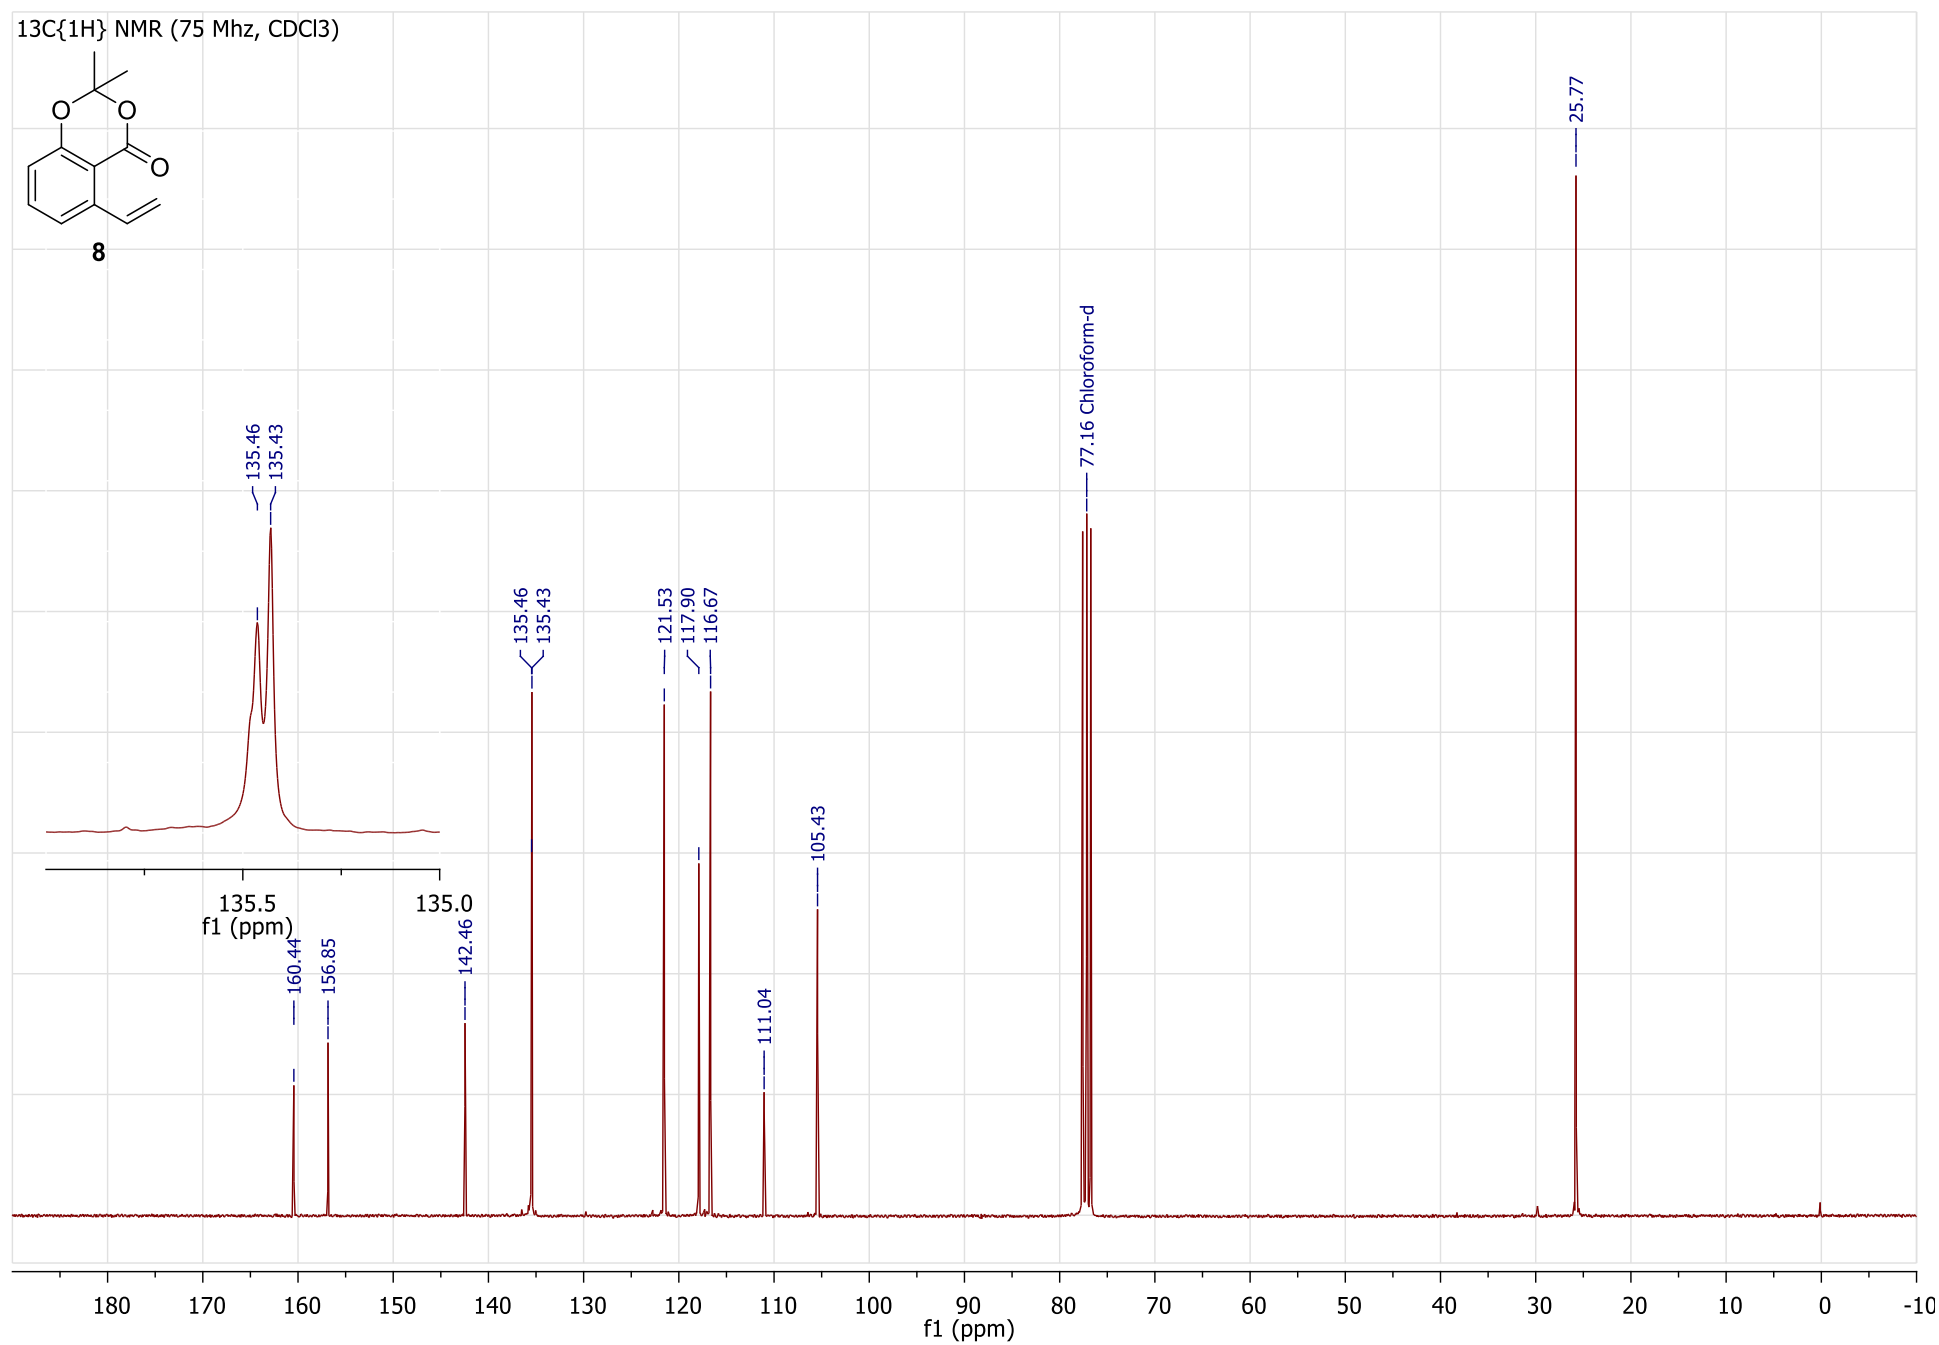

Figure S5.  $^{13}\text{C}$  NMR spectrum of **8**.

<sup>1</sup>H NMR (CDCl<sub>3</sub>, 300 MHz)

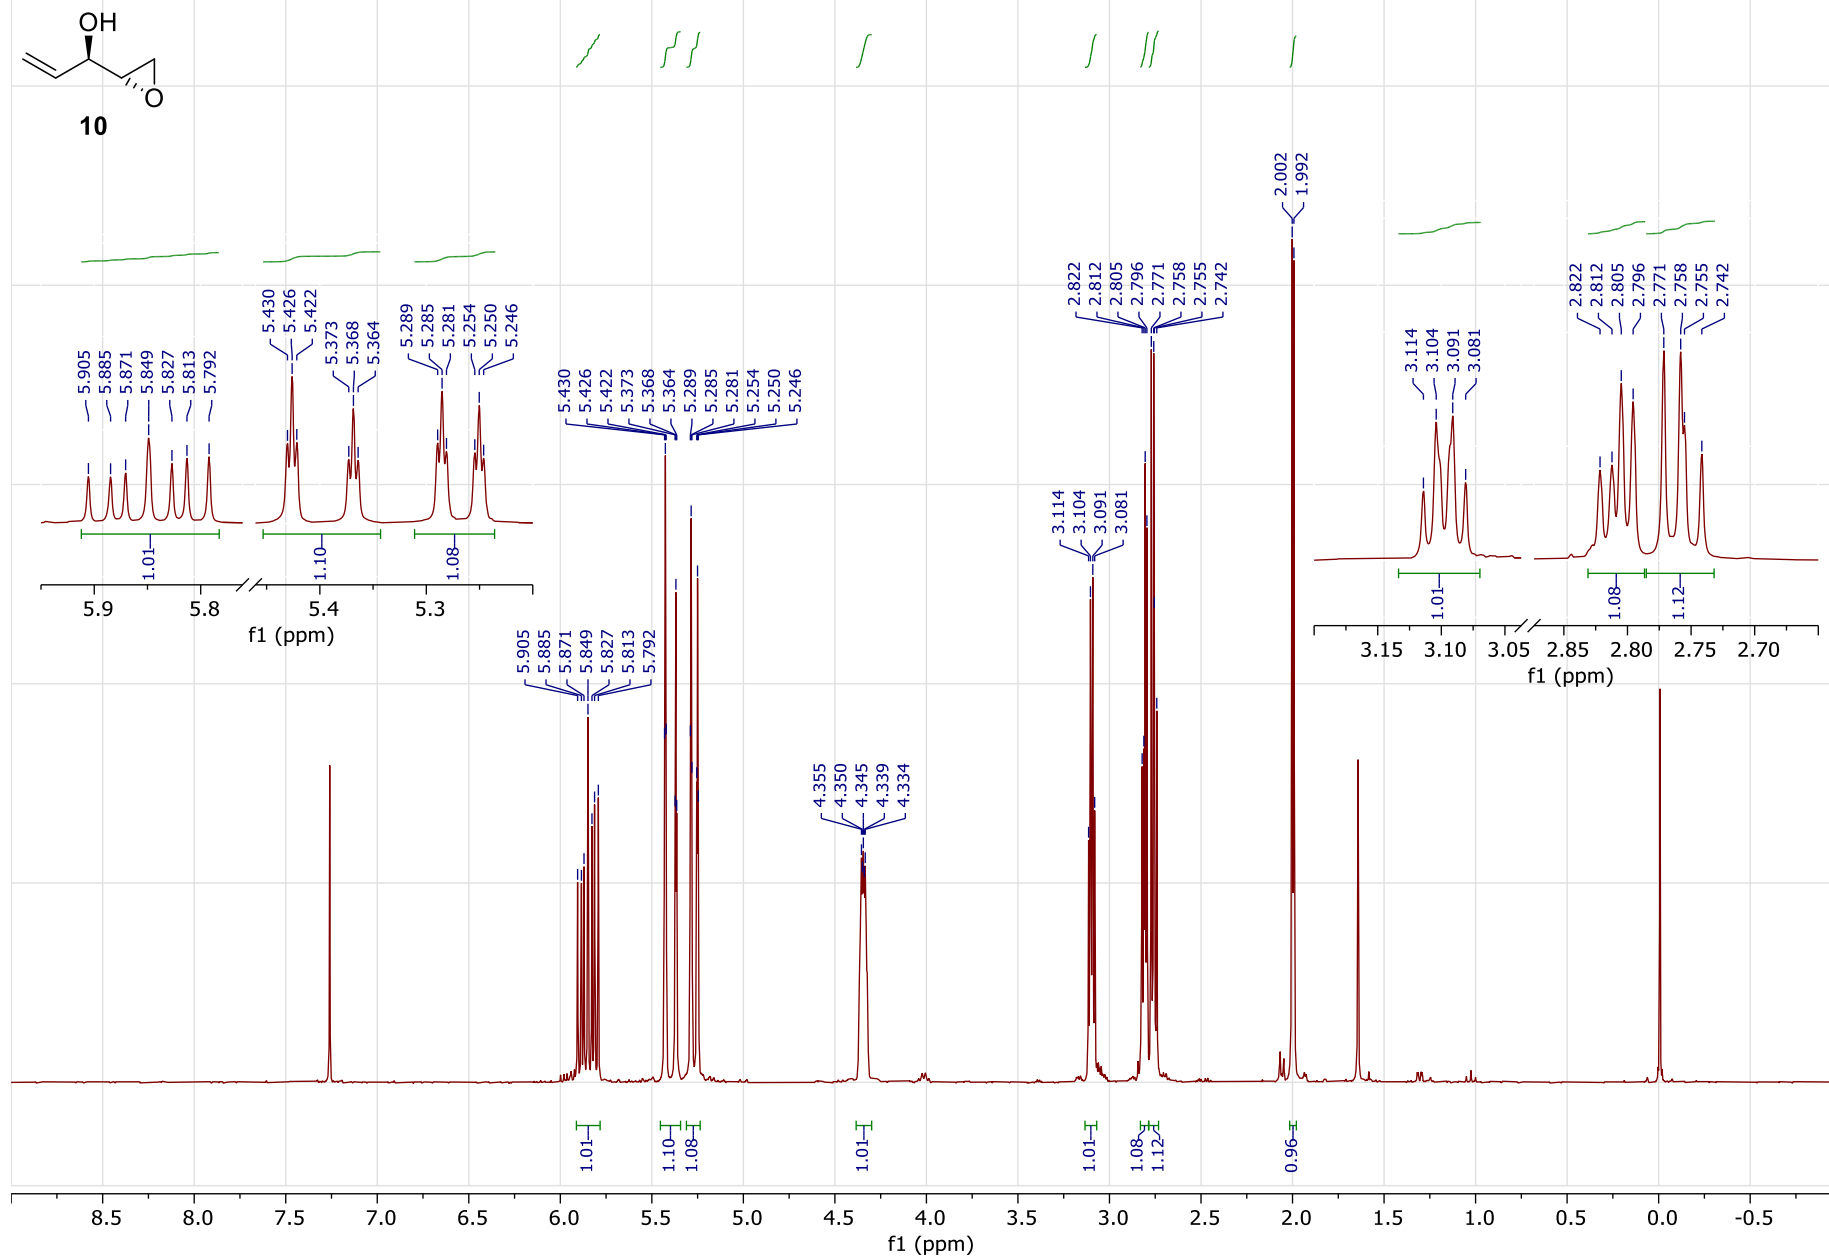

**Figure S6.** <sup>1</sup>H NMR spectrum of **10**.

$^{13}\text{C}\{^1\text{H}\}$  NMR (75 MHz,  $\text{CDCl}_3$ )

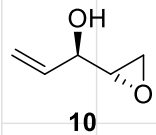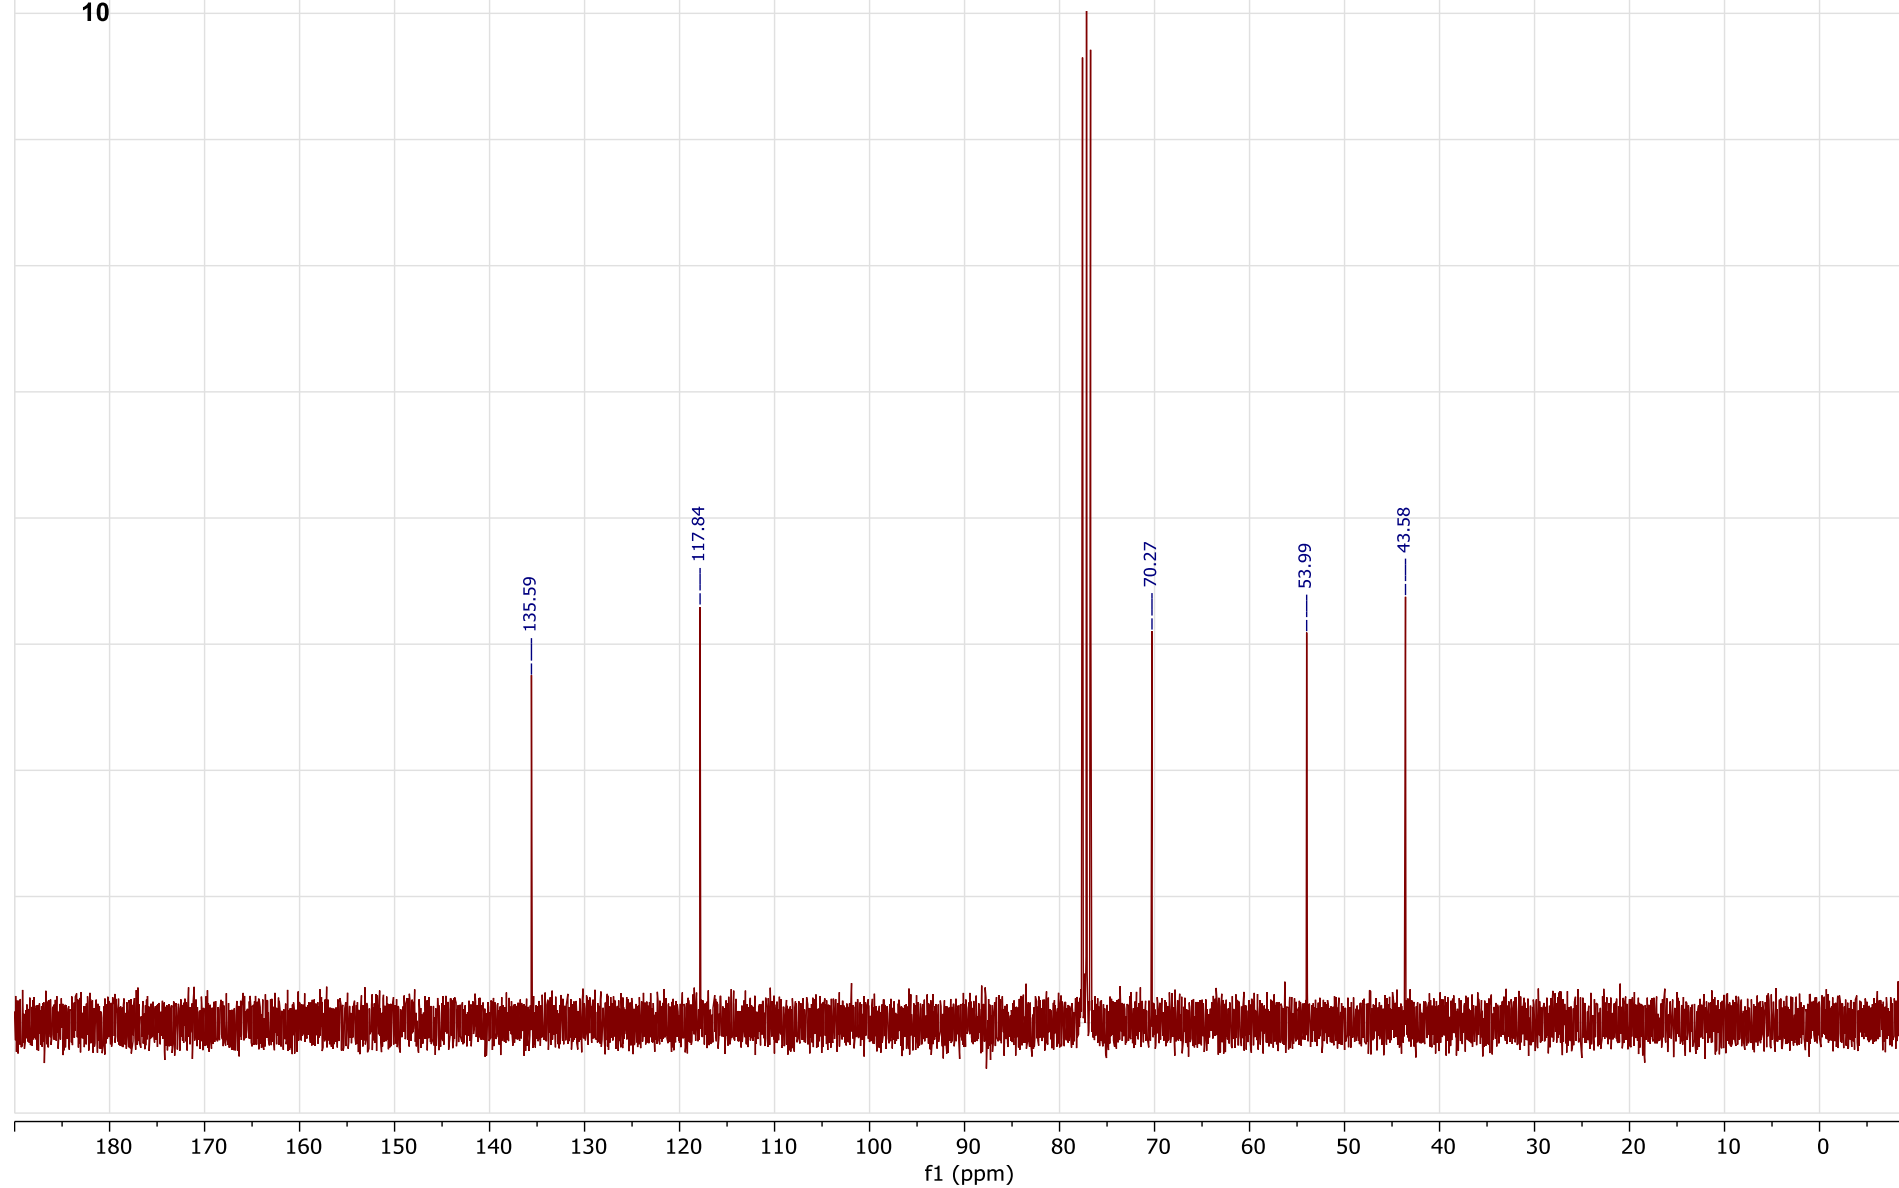

**Figure S7.**  $^{13}\text{C}$  NMR spectrum of **10**.



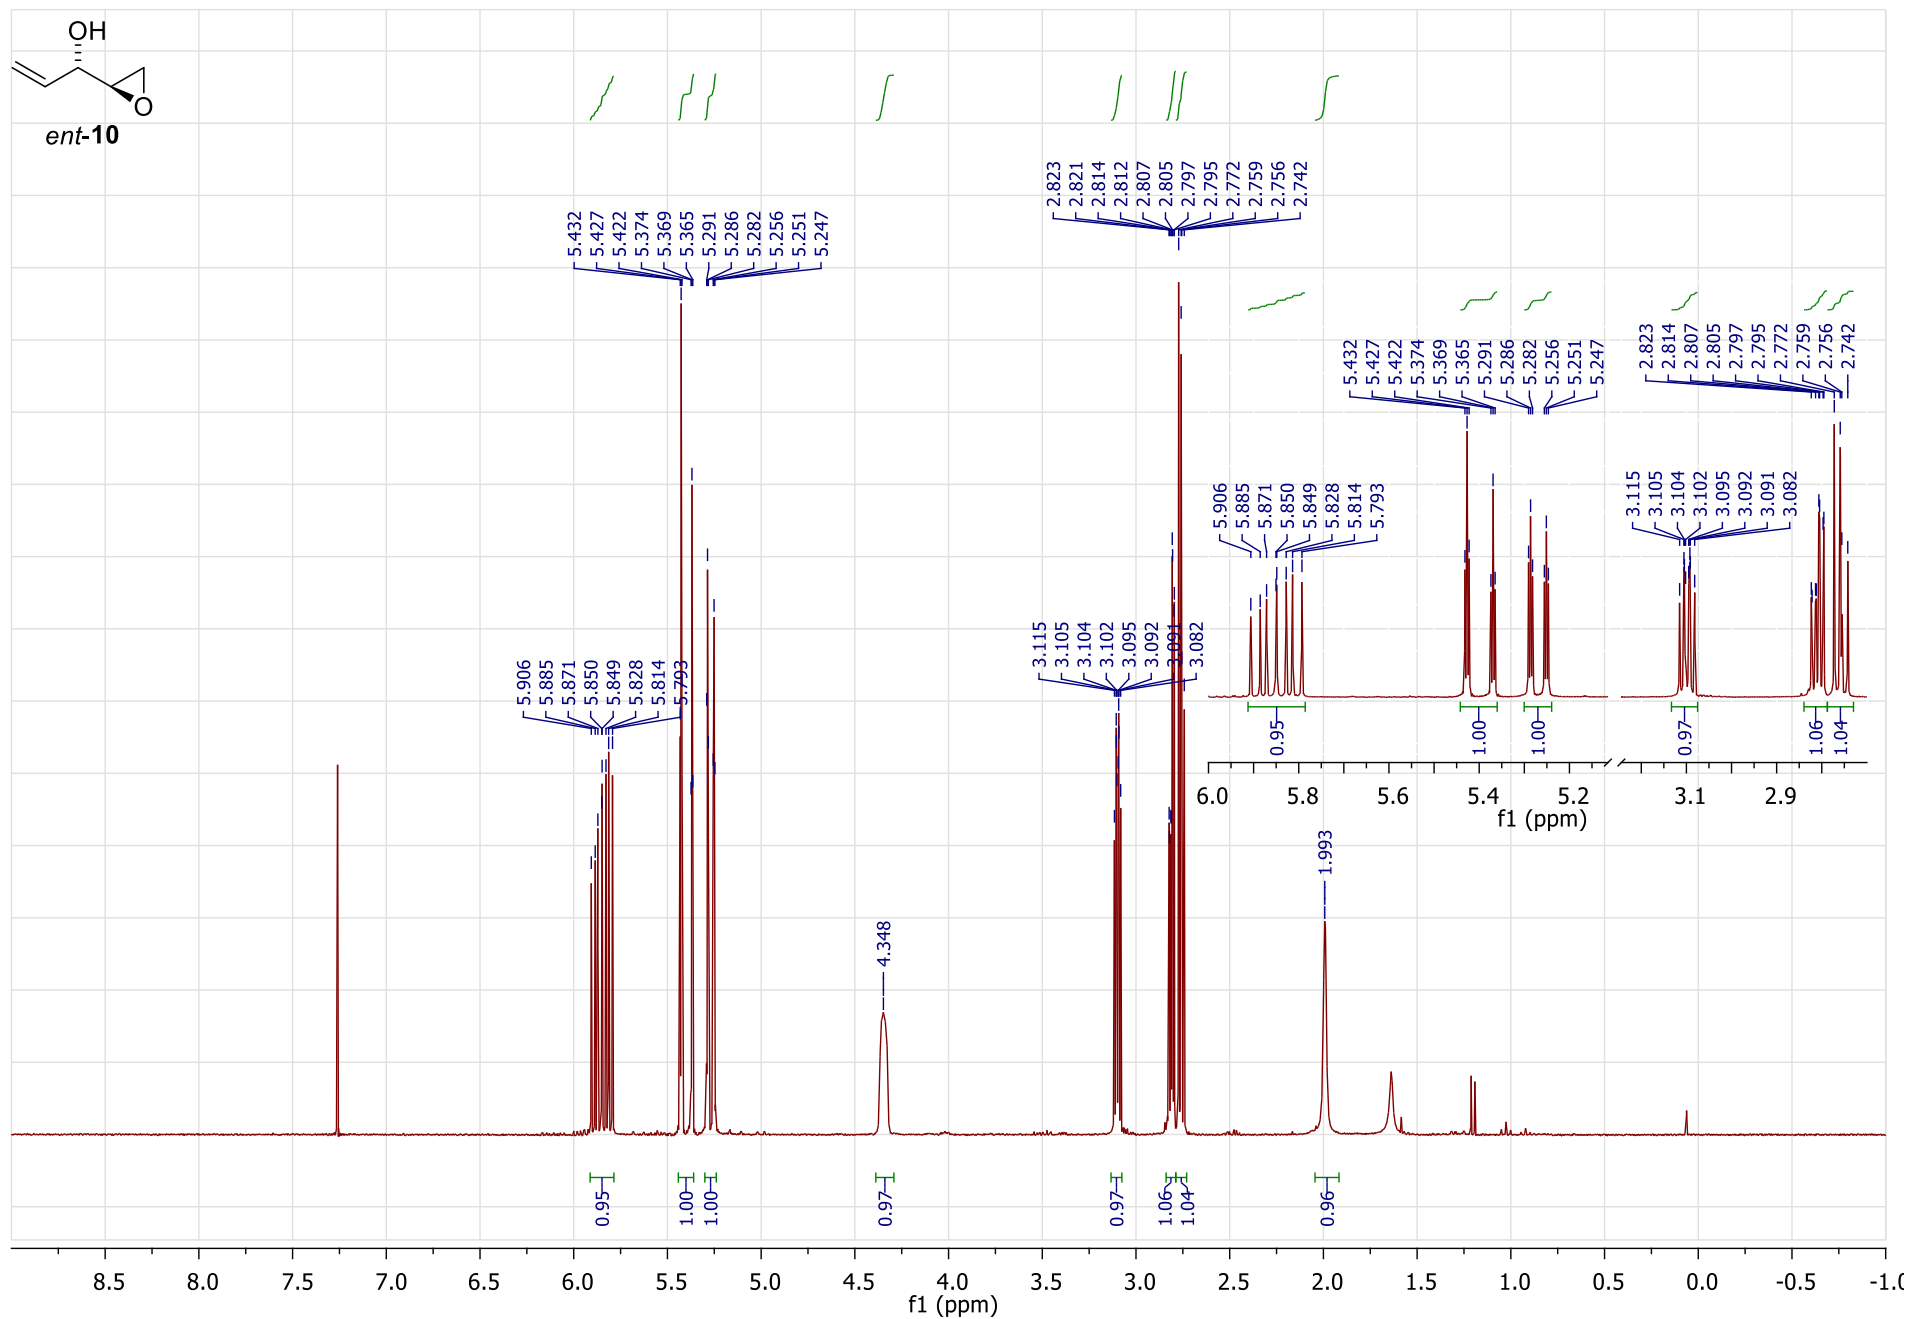

Figure S8.  $^1\text{H}$  NMR spectrum of *ent-10*.

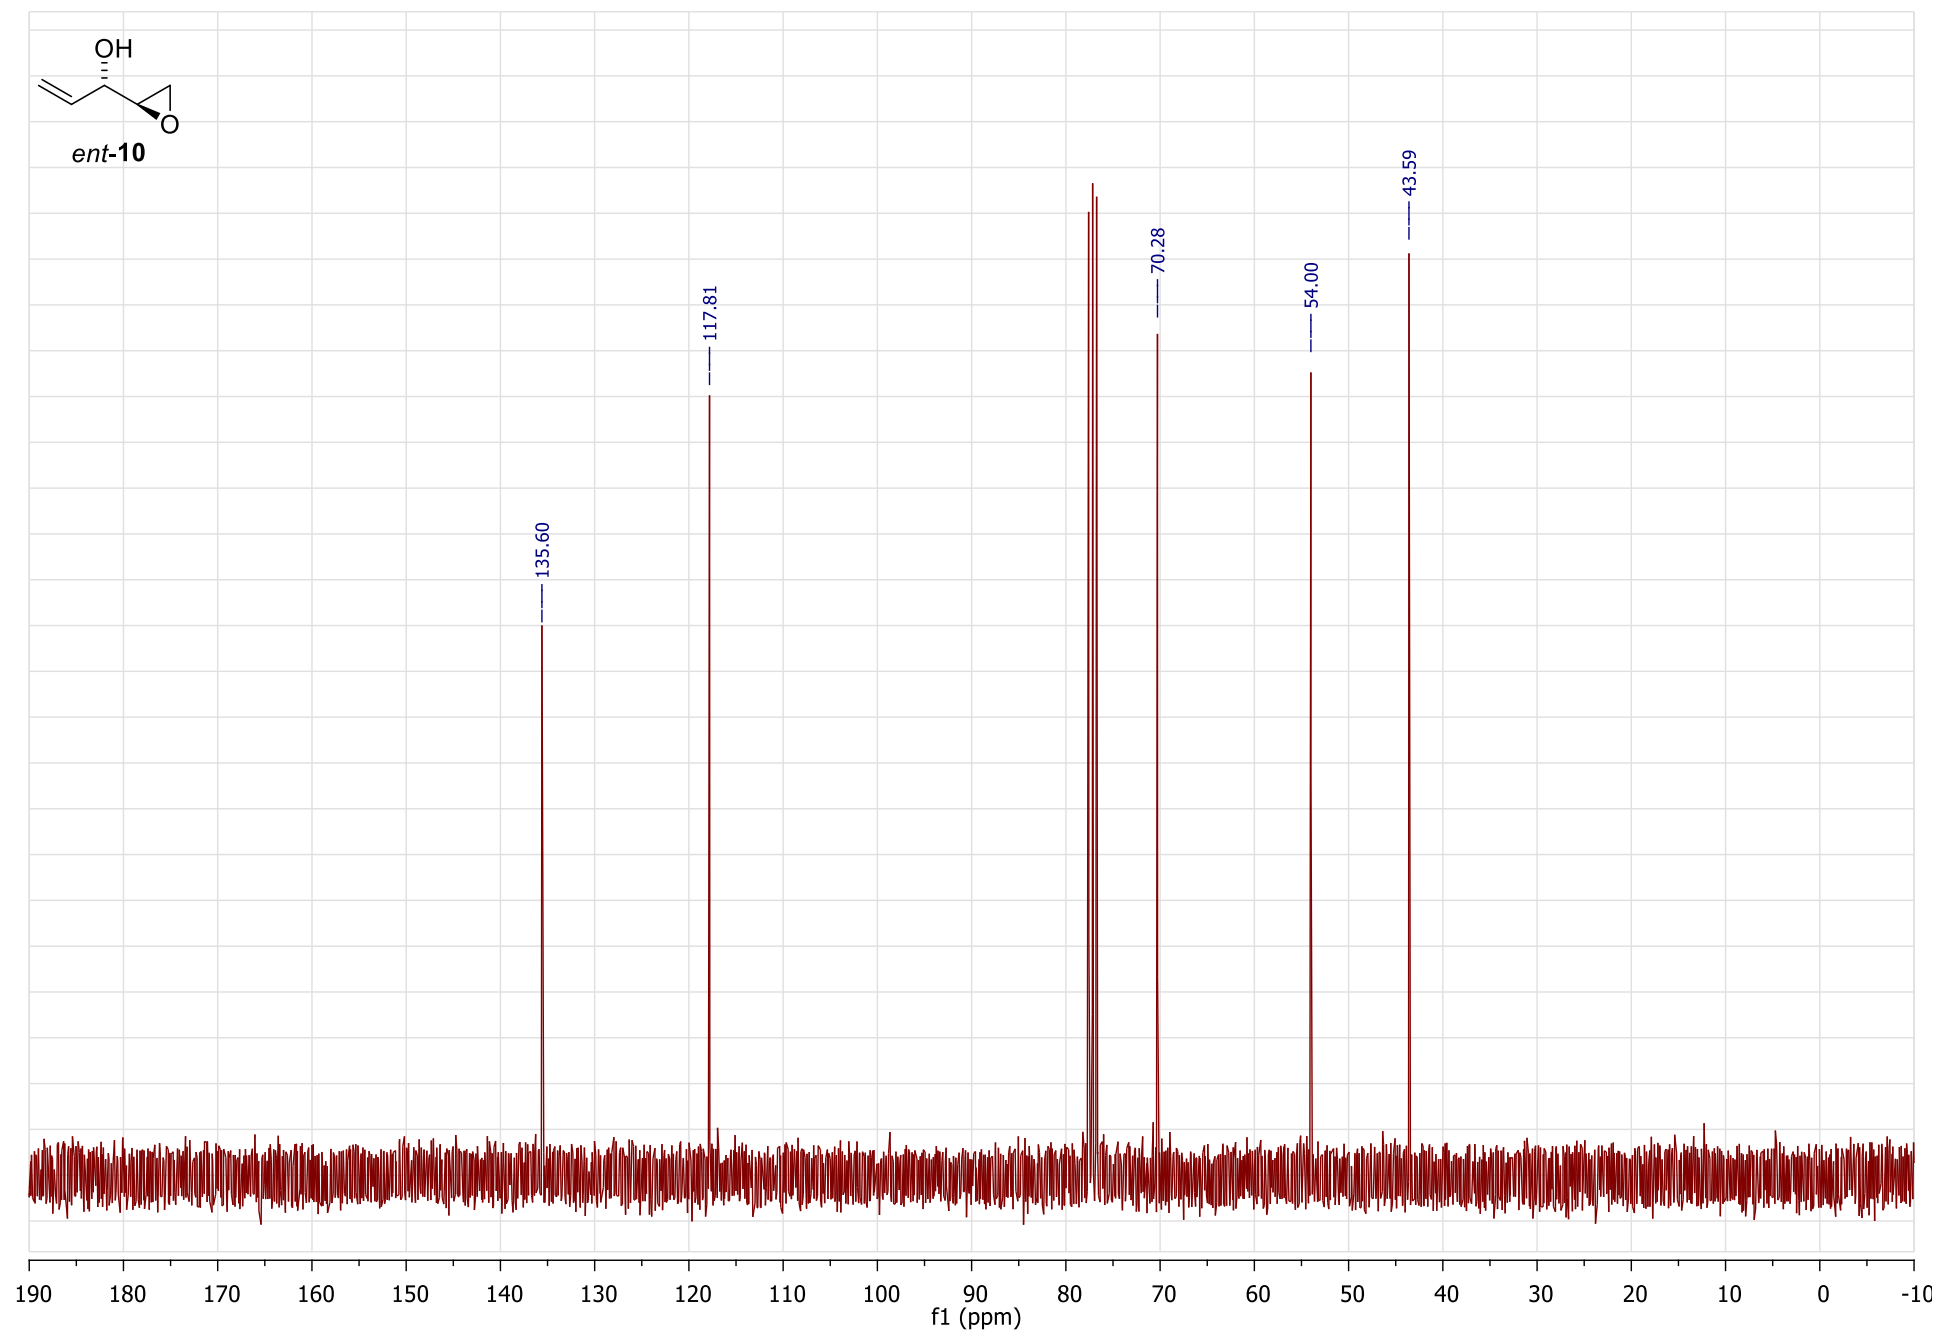

**Figure S9.**  $^{13}\text{C}$  NMR spectrum of *ent-10*.

<sup>1</sup>H NMR (300 Mhz, CDCl<sub>3</sub>)

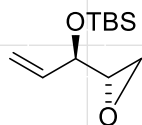

**11**

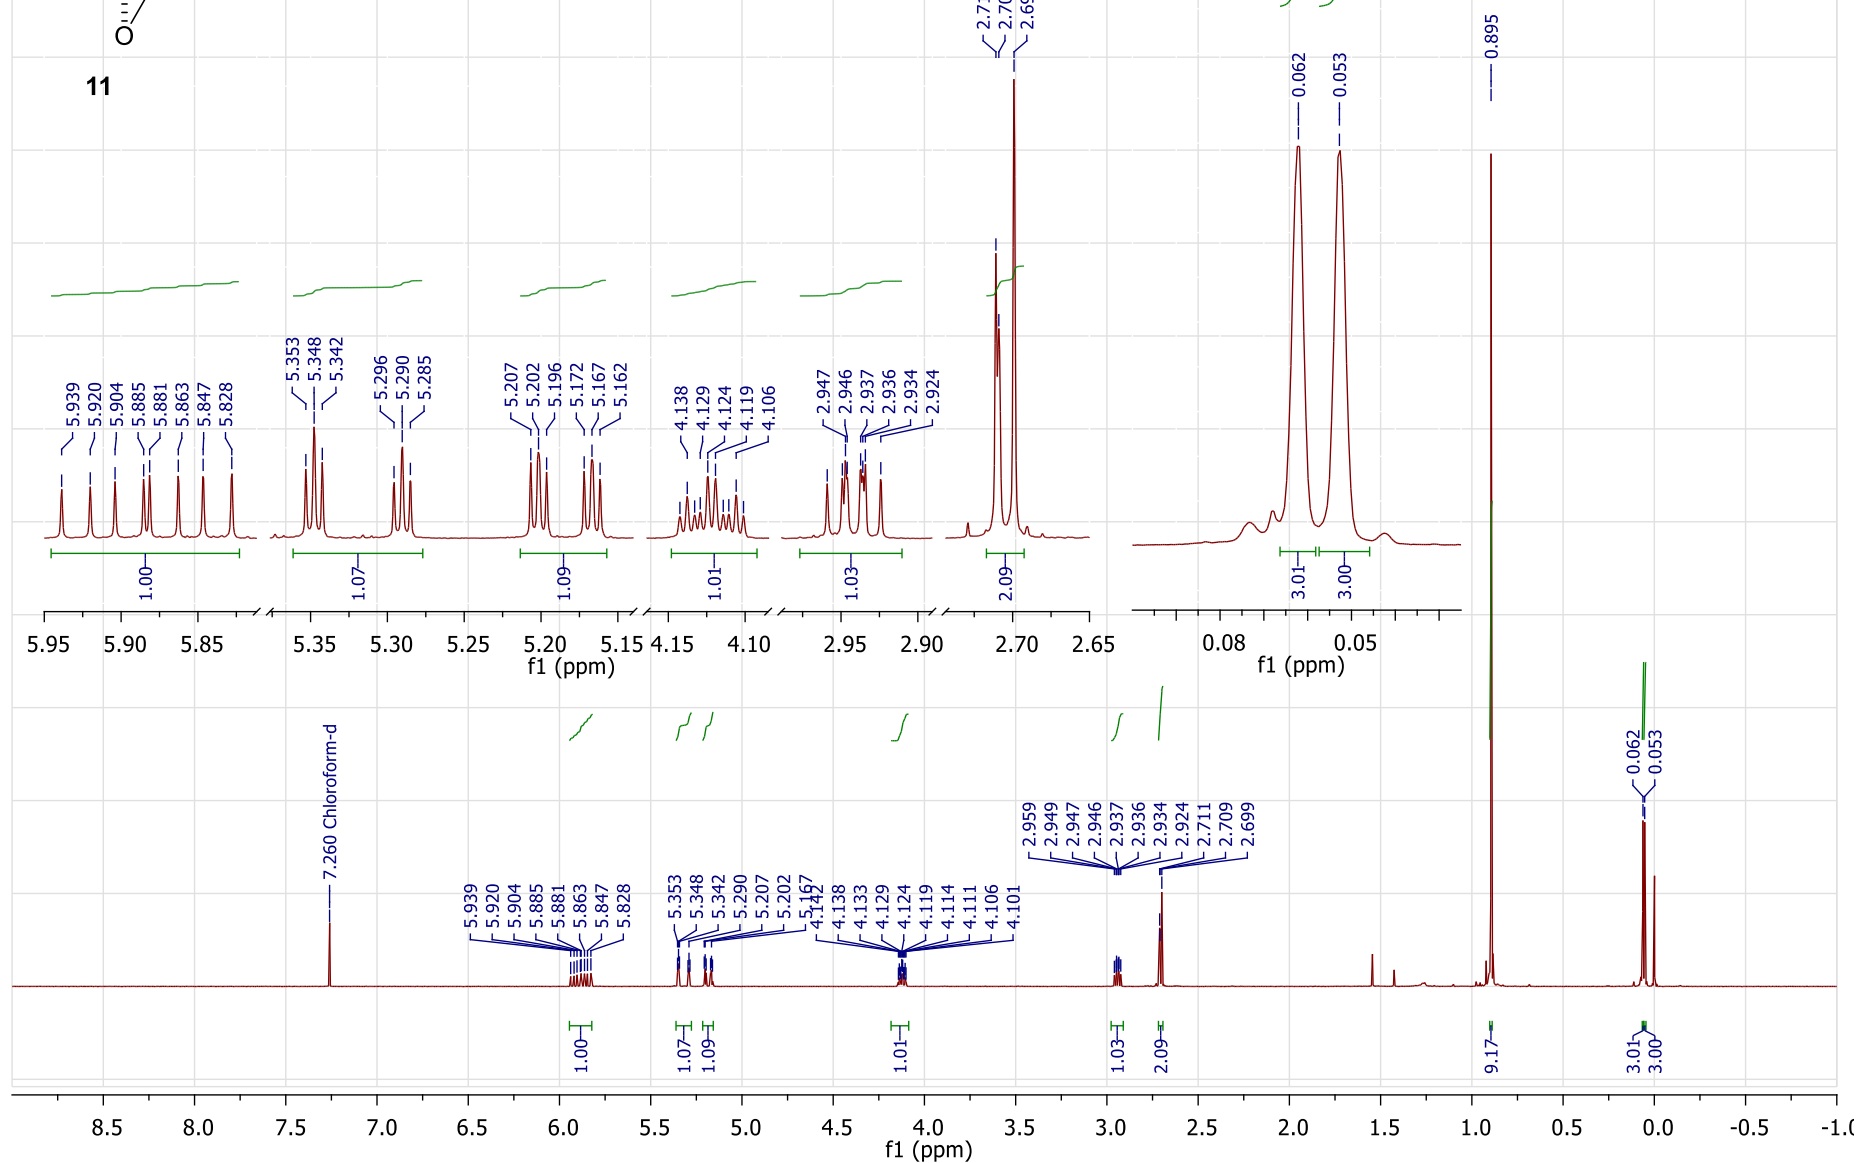

**Figure S10.** <sup>1</sup>H NMR spectrum of **11**.

$^{13}\text{C}\{^1\text{H}\}$  NMR (75 Mhz,  $\text{CDCl}_3$ )

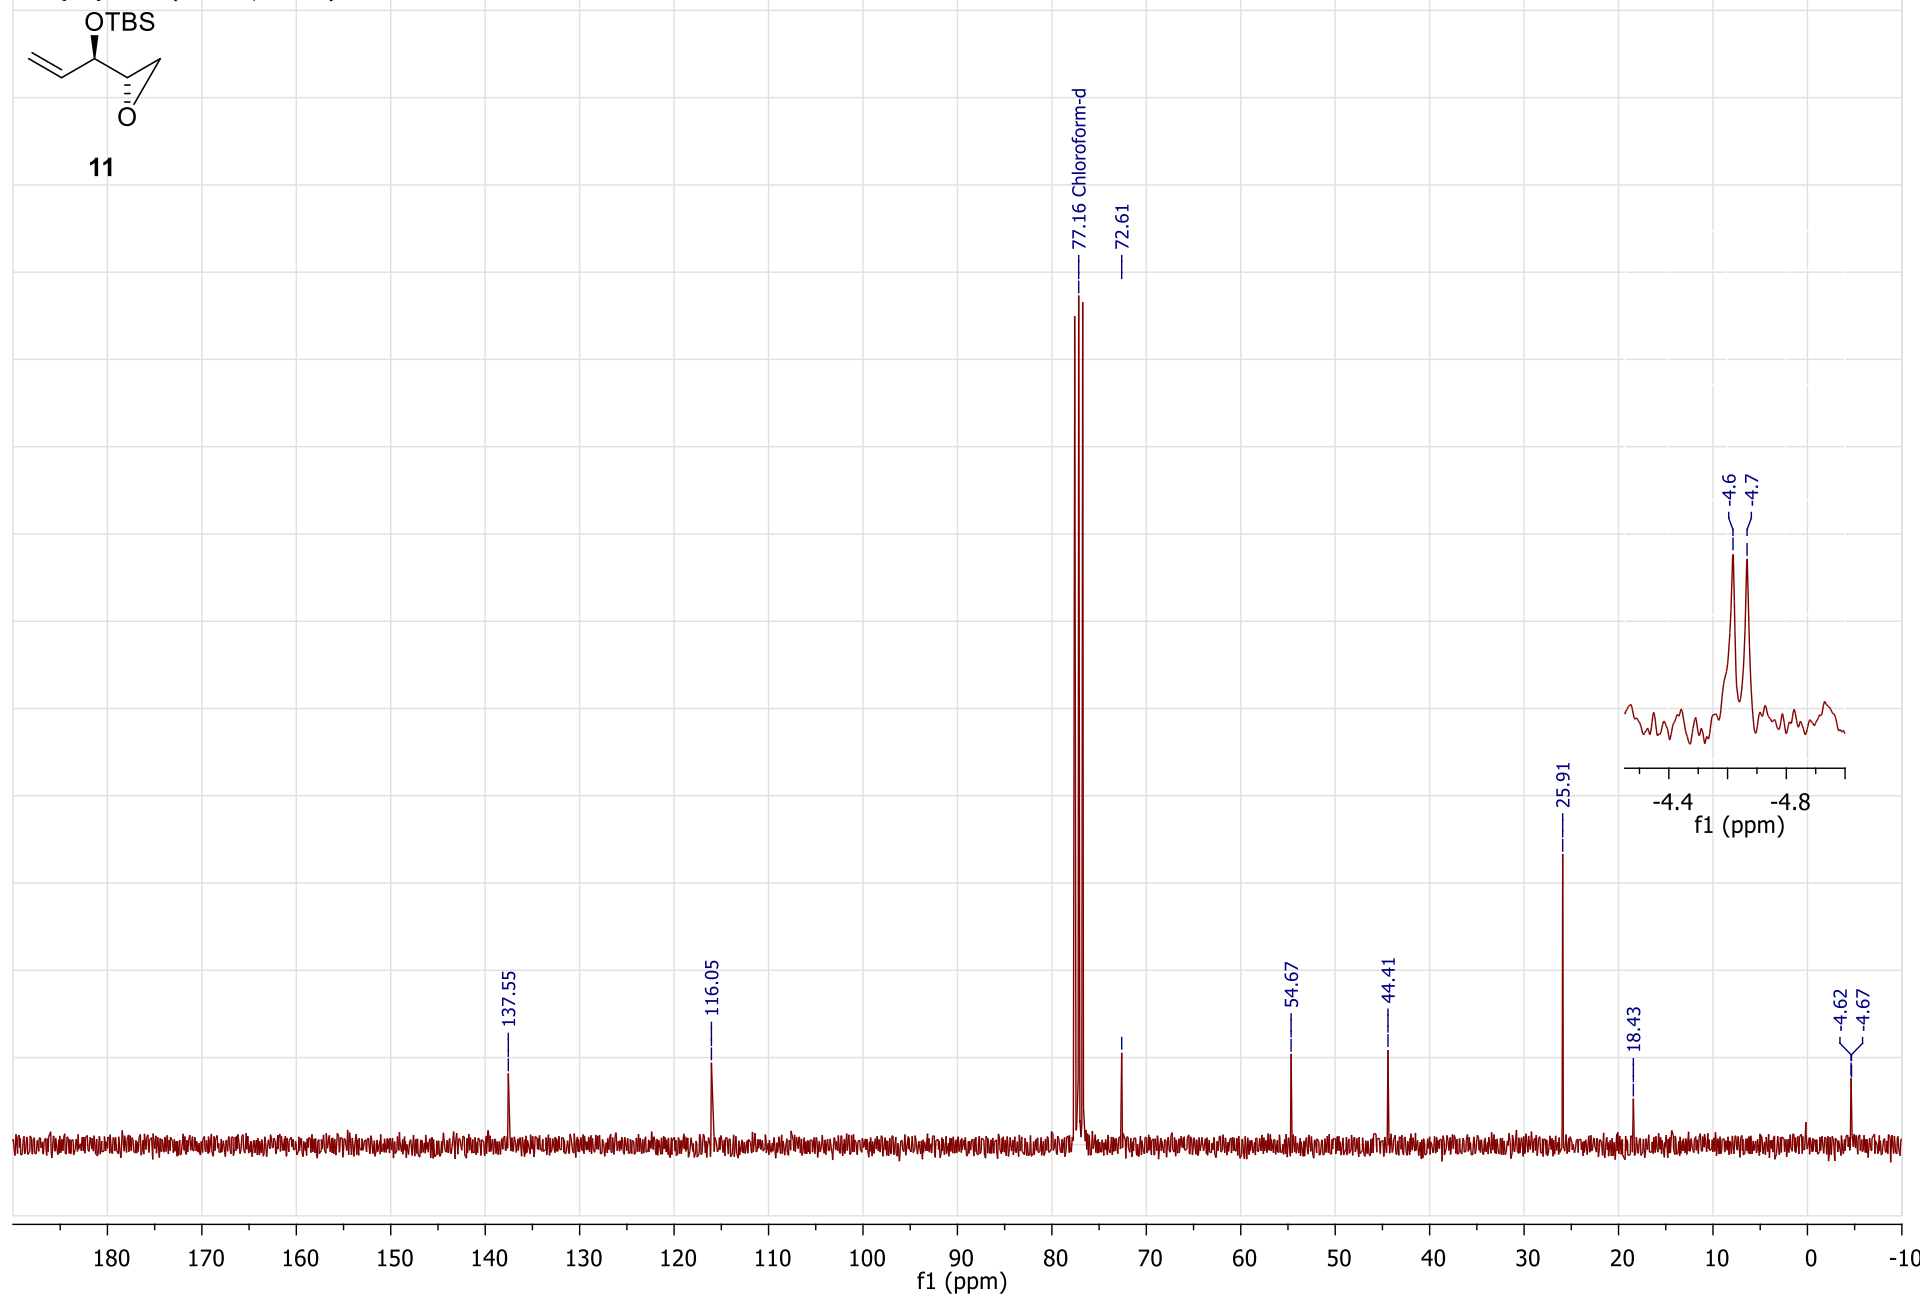

Figure S11.  $^{13}\text{C}$  NMR spectrum of **11**.

<sup>1</sup>H NMR (300 Mhz, CDCl<sub>3</sub>)

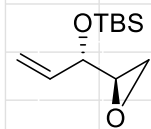

*ent*-11

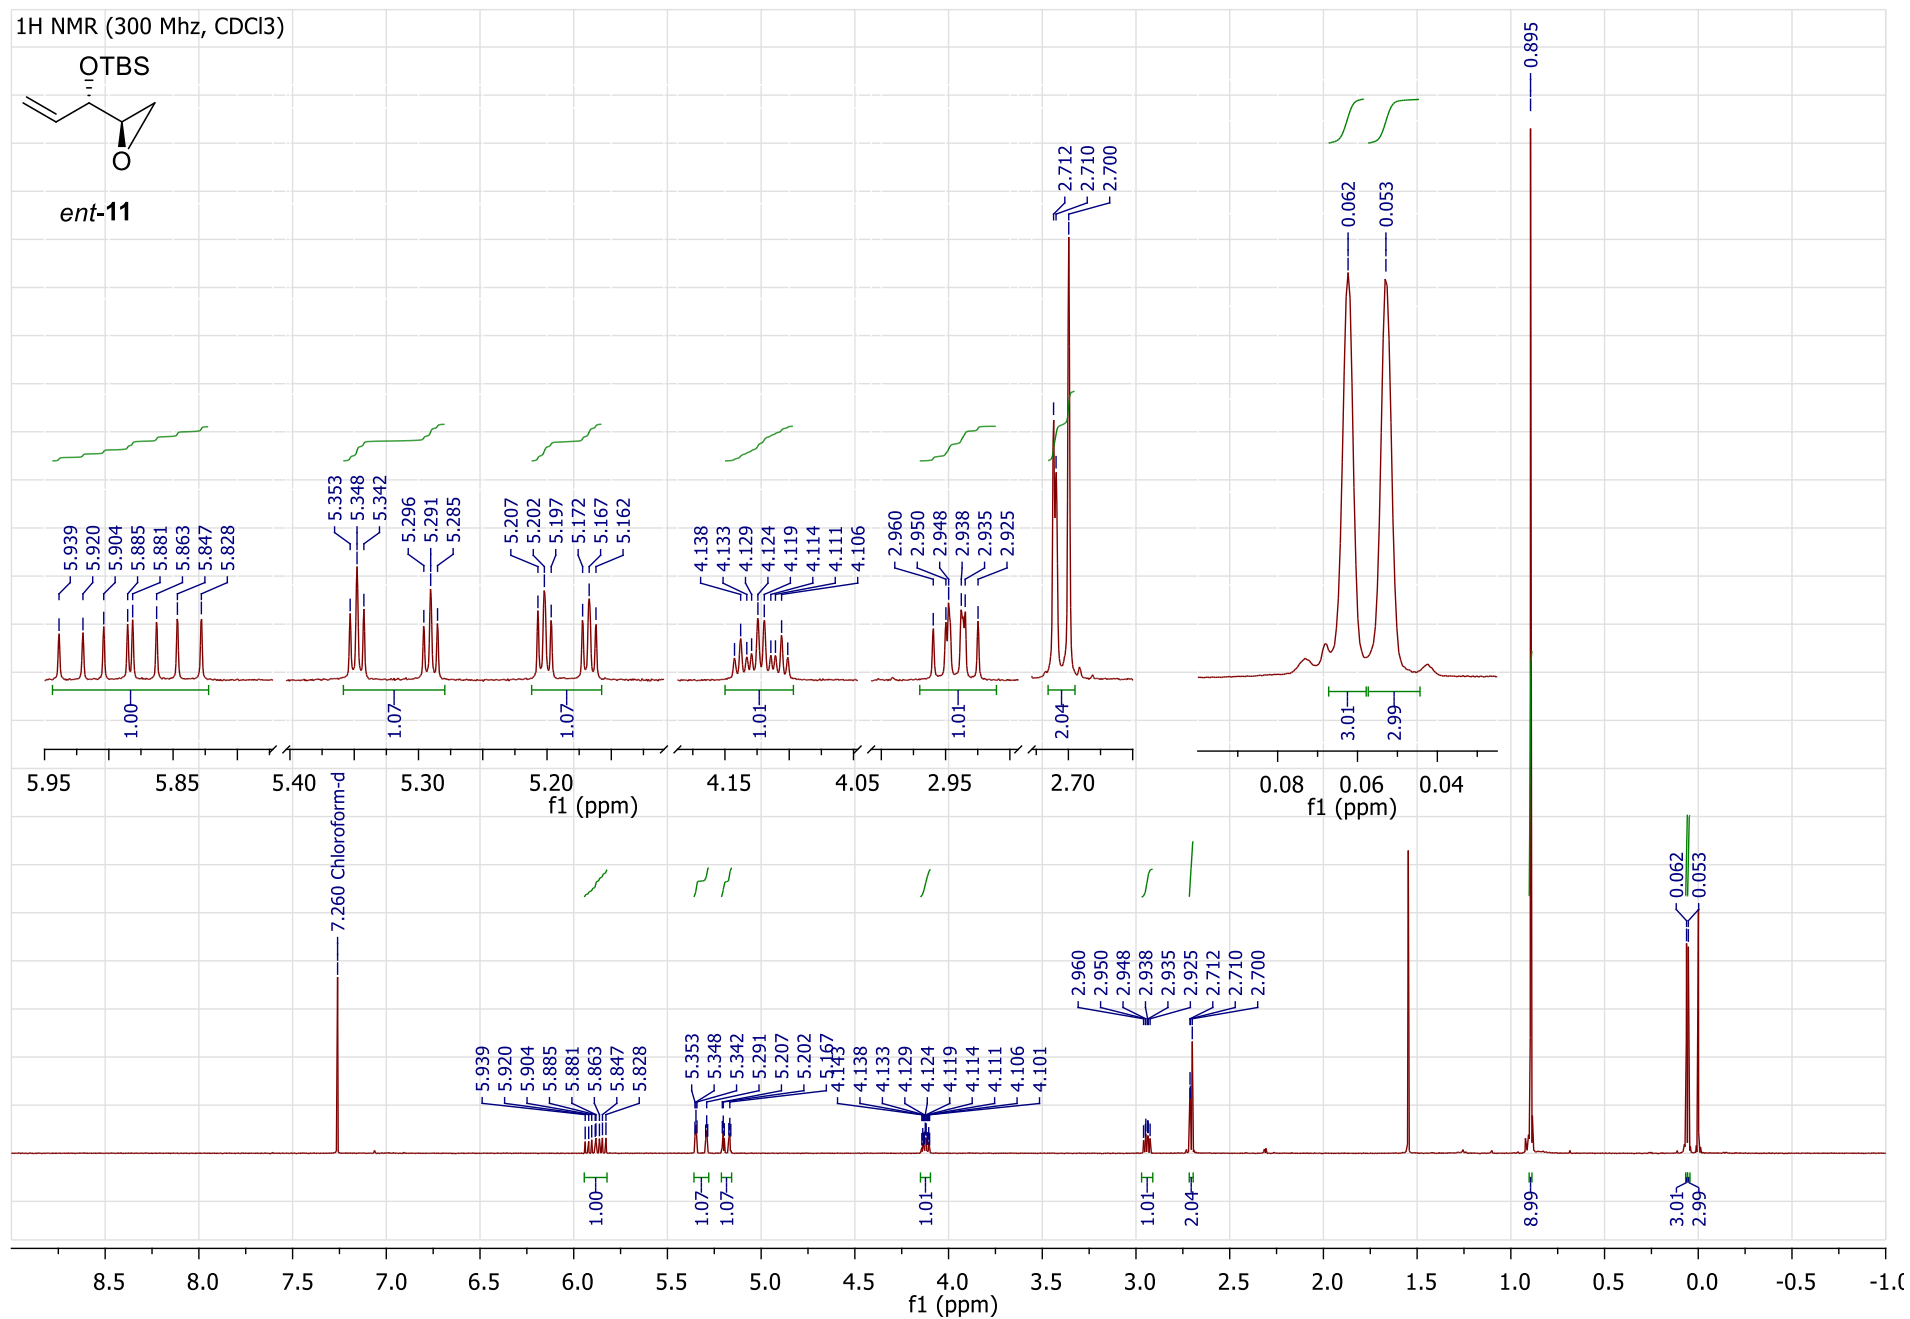

Figure S12. <sup>1</sup>H NMR spectrum of *ent*-11.

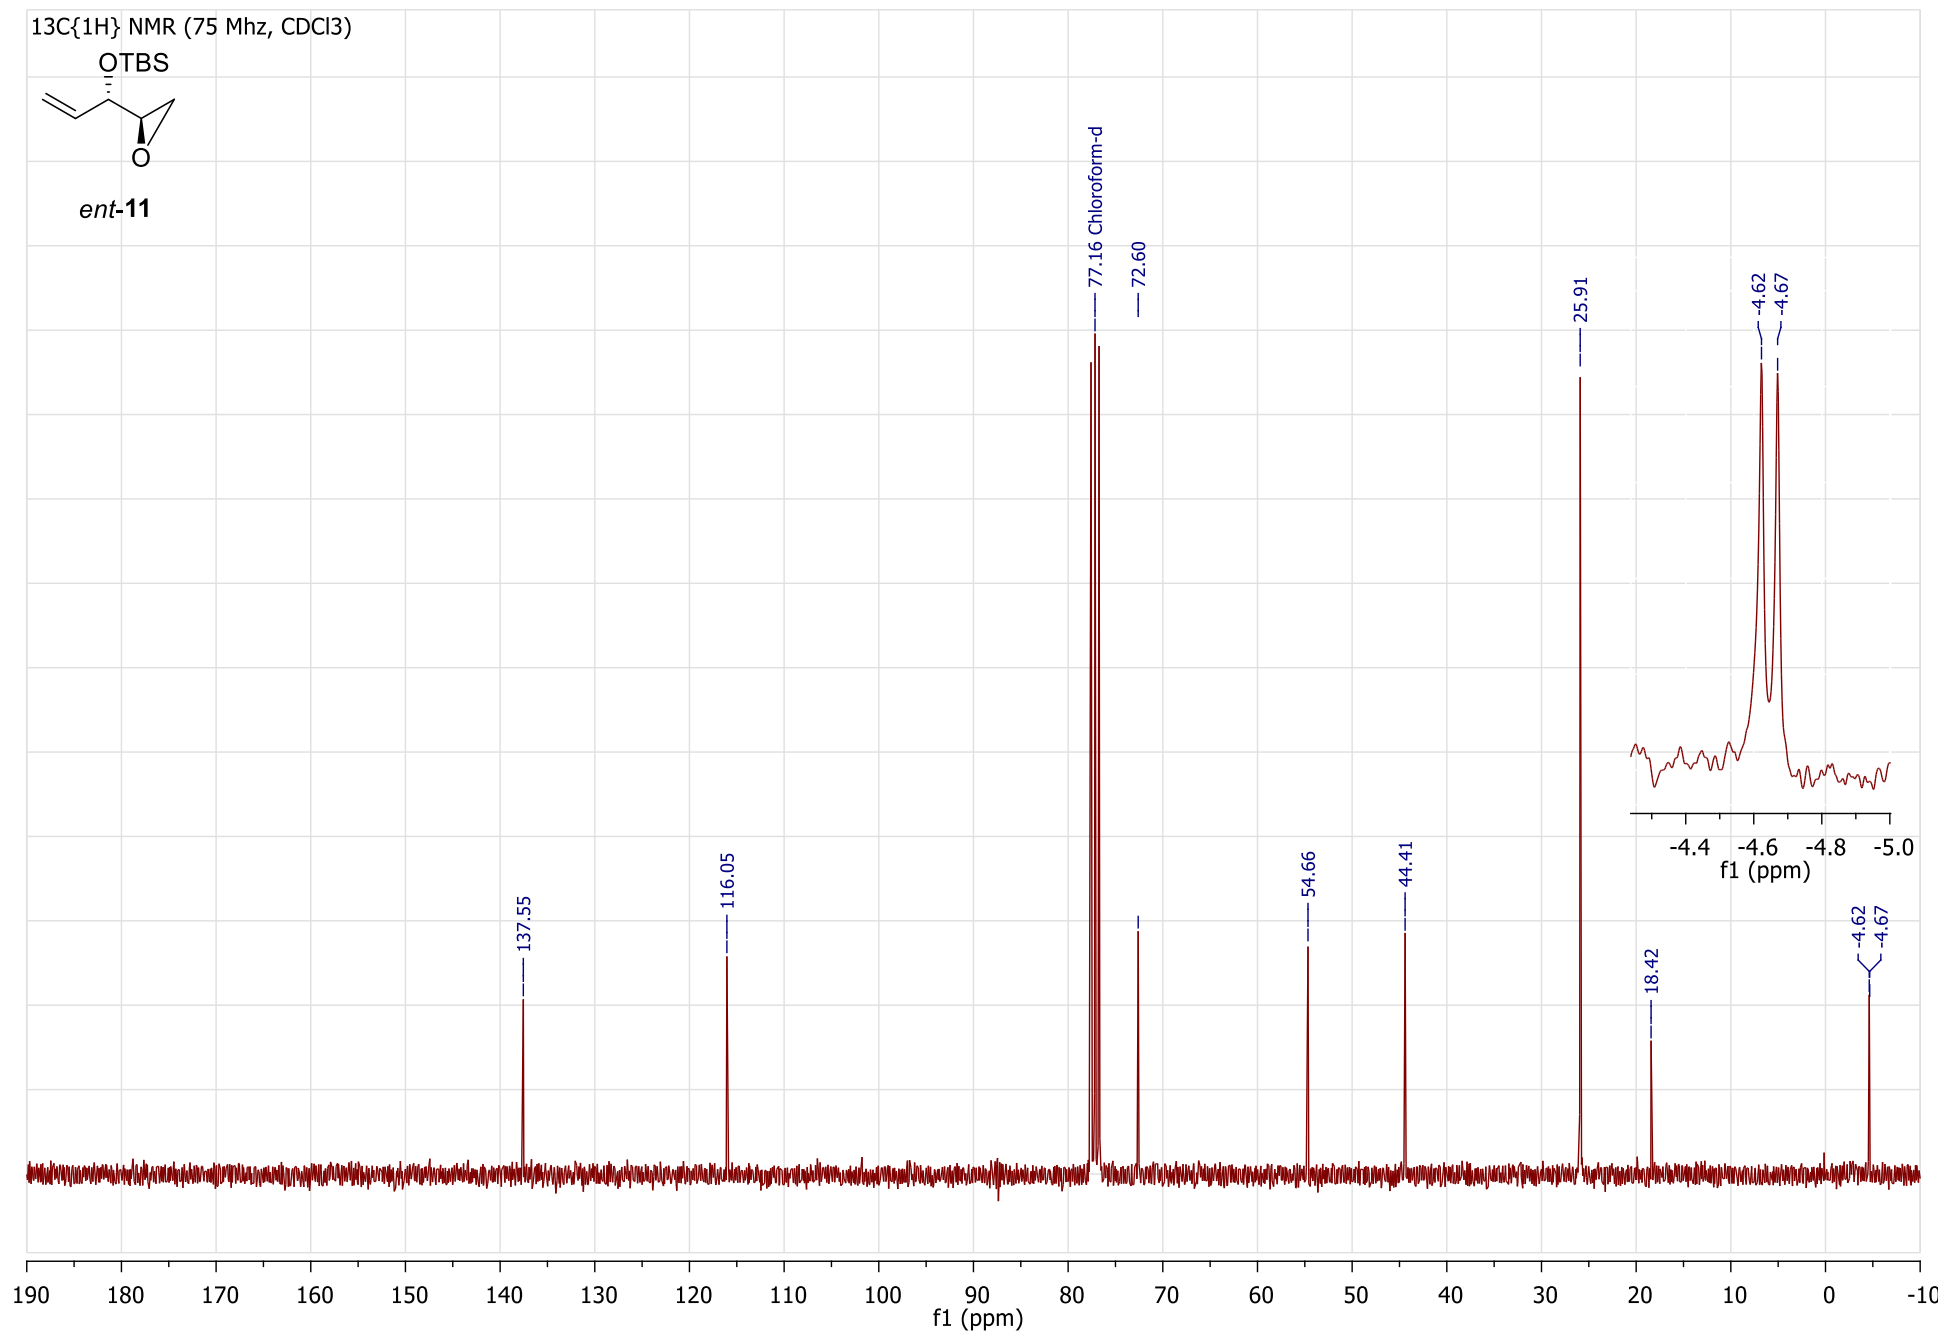

Figure S13.  $^{13}\text{C}$  NMR spectrum of *ent*-11.

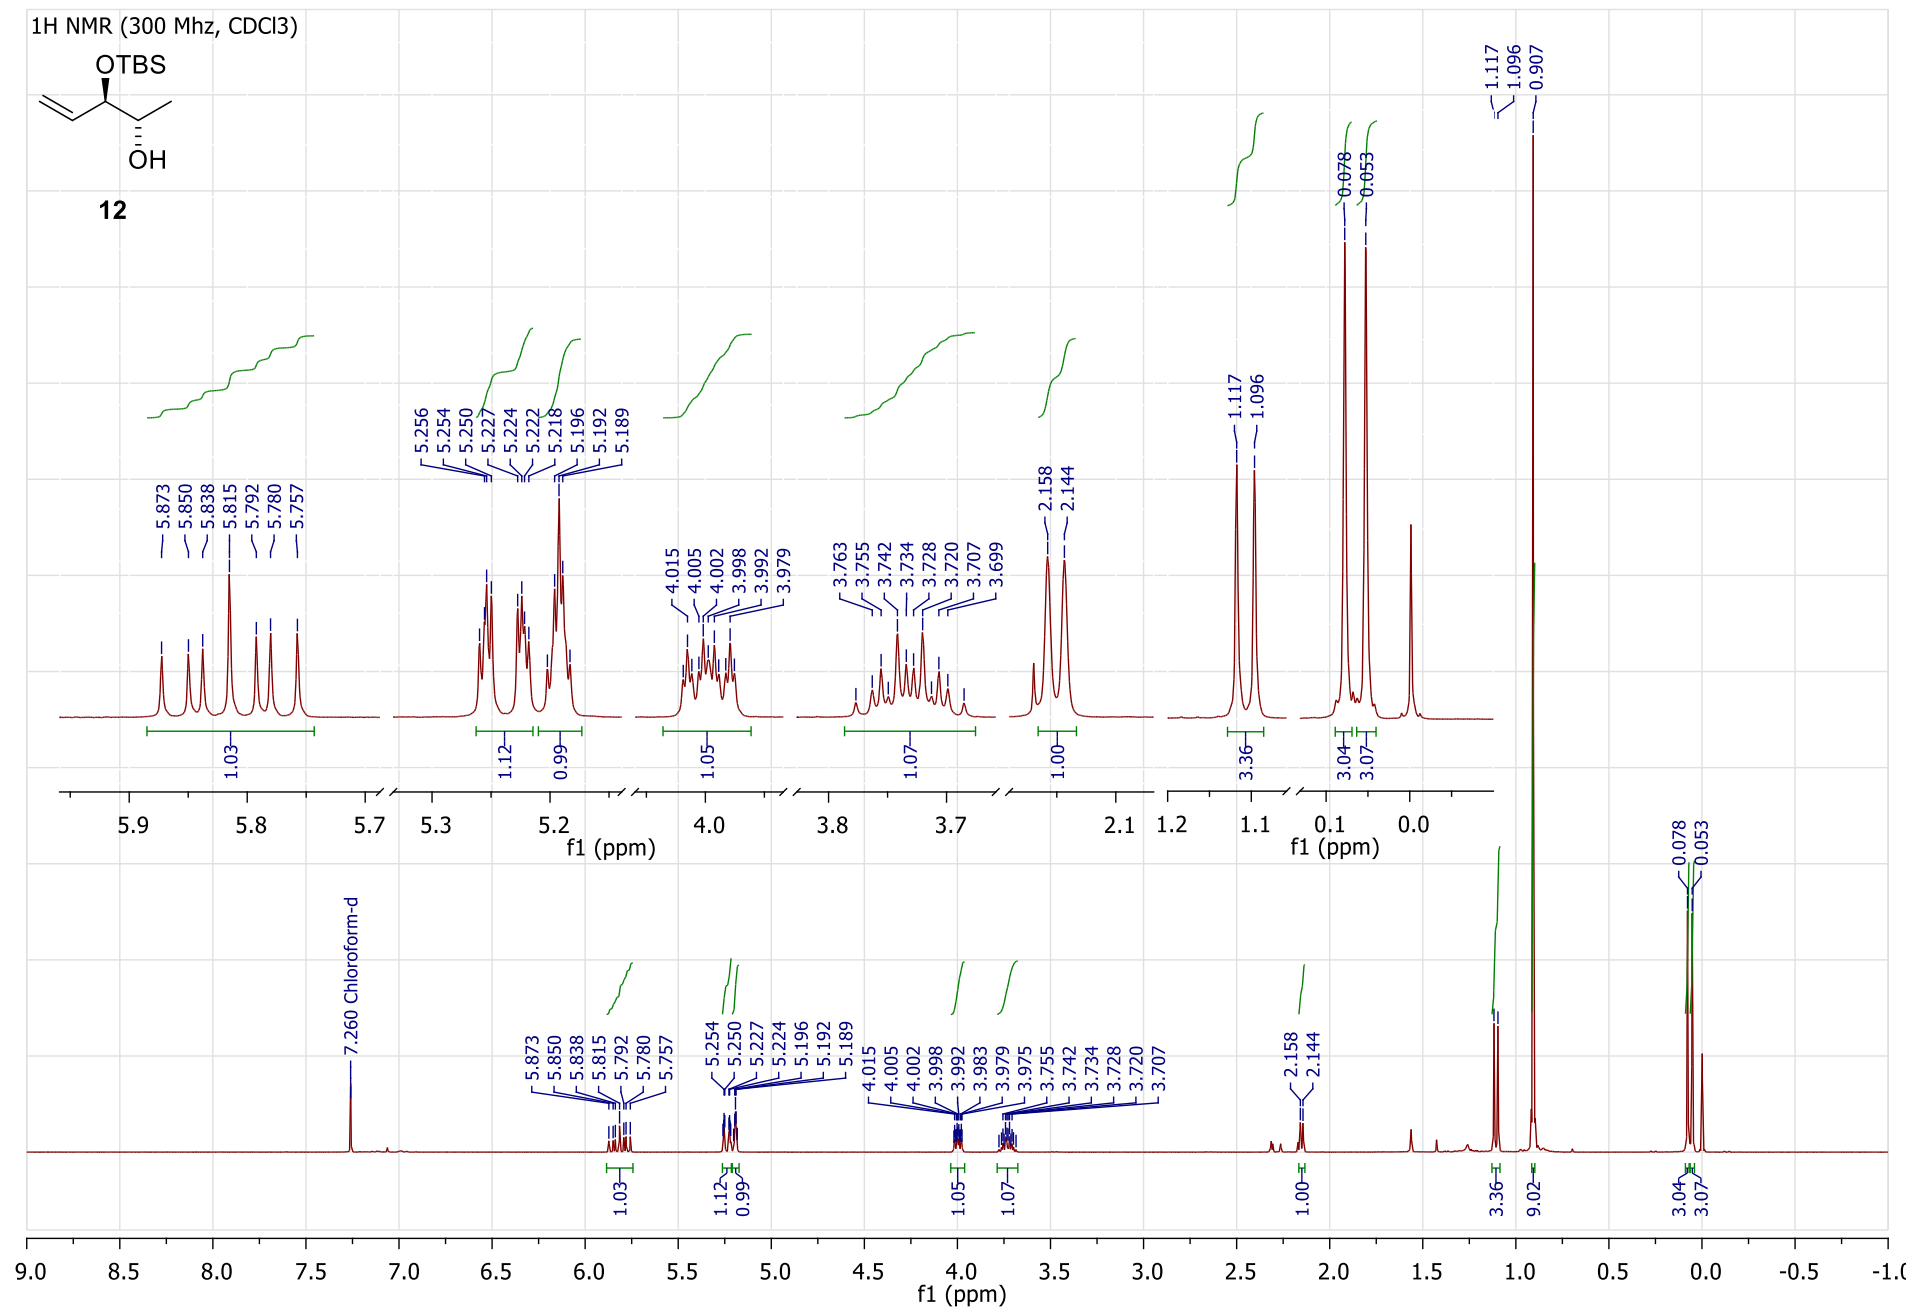

Figure S14. <sup>1</sup>H NMR spectrum of **12**.

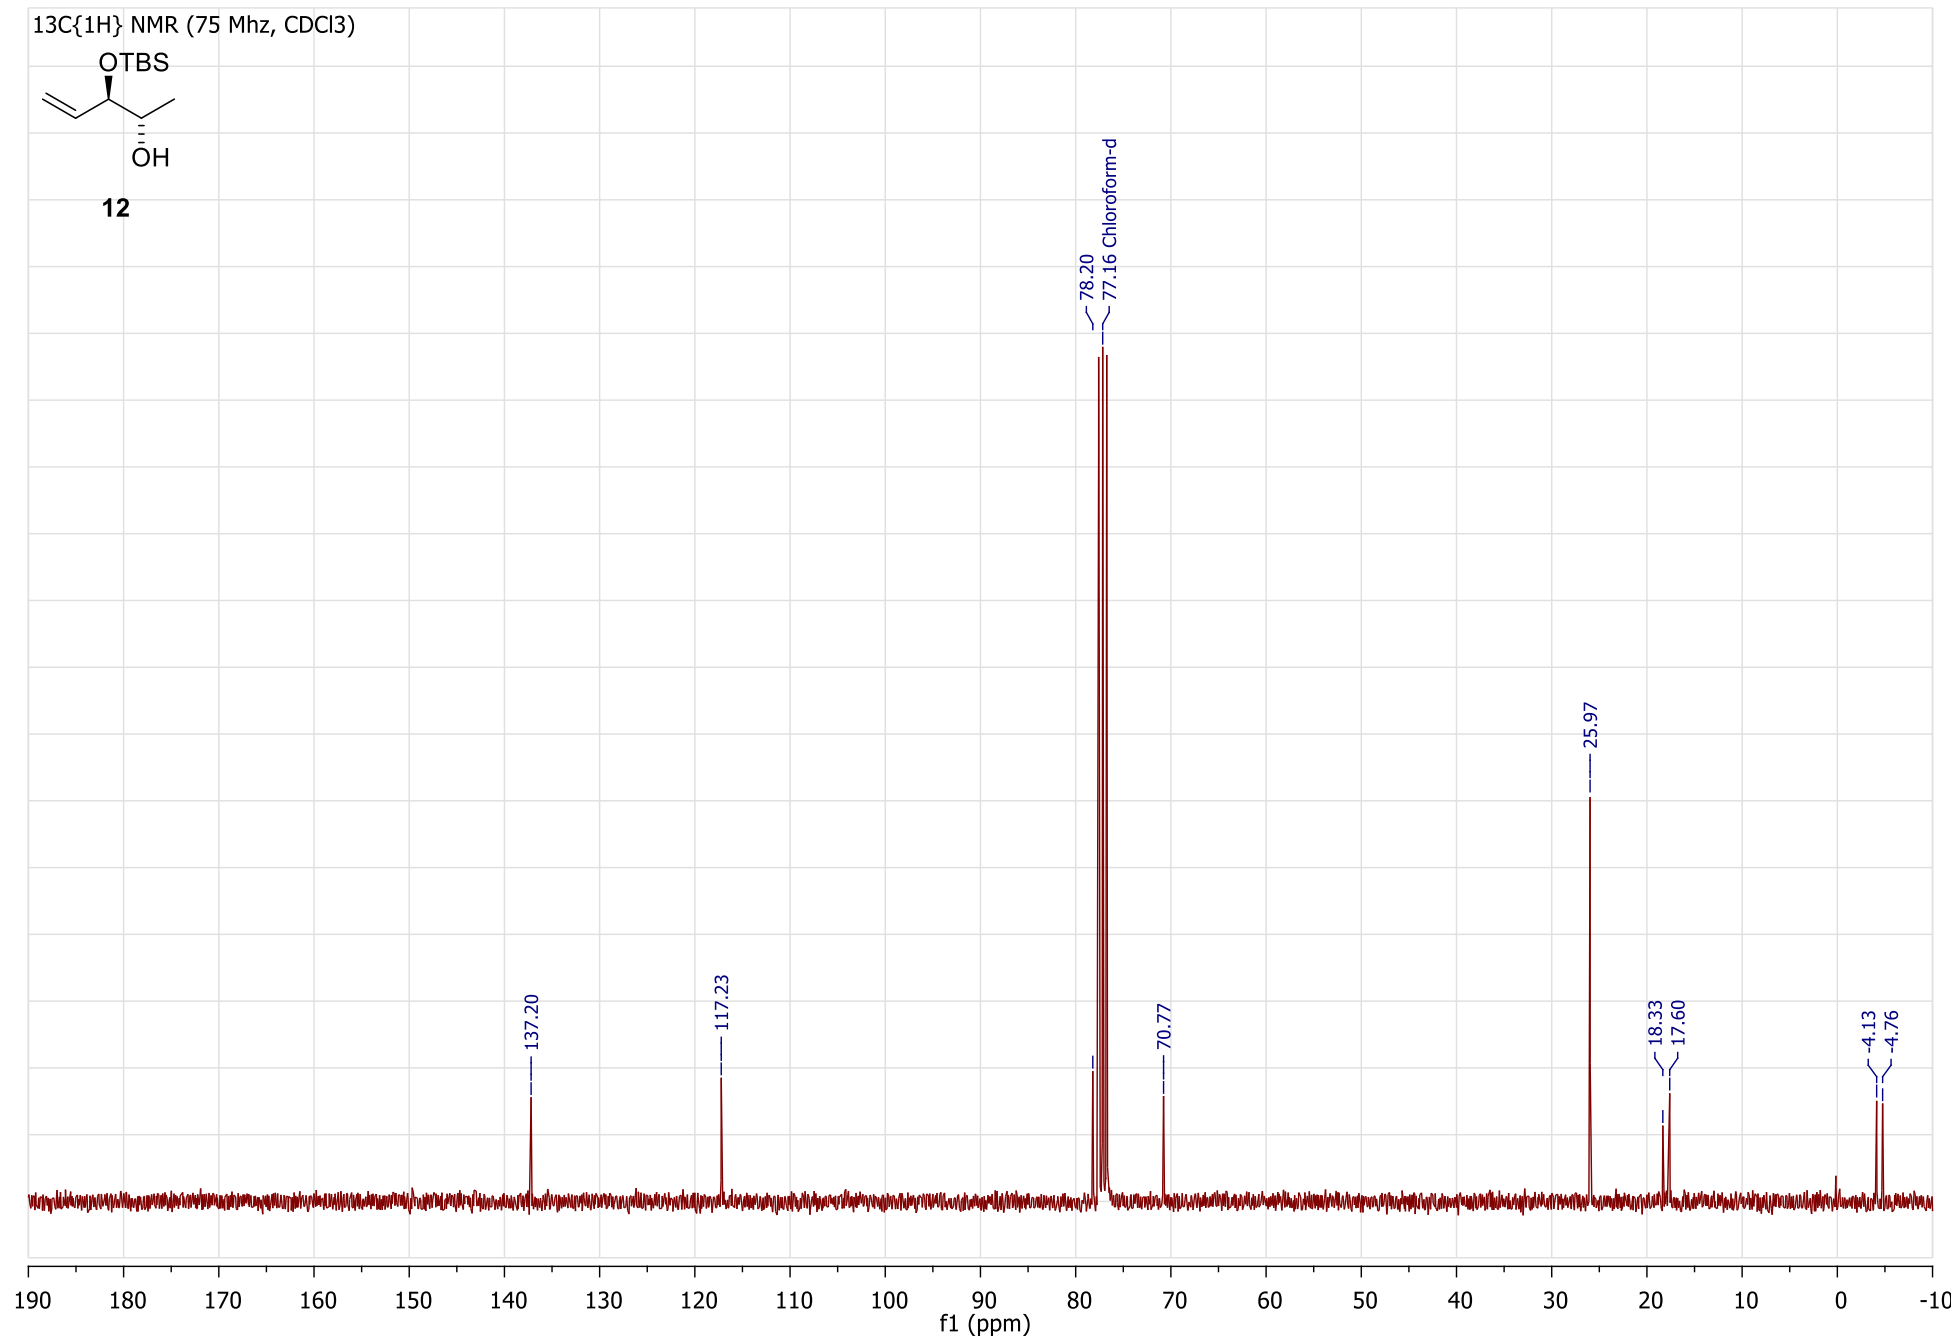

**Figure S15.**  $^{13}\text{C}$  NMR spectrum of **12**.



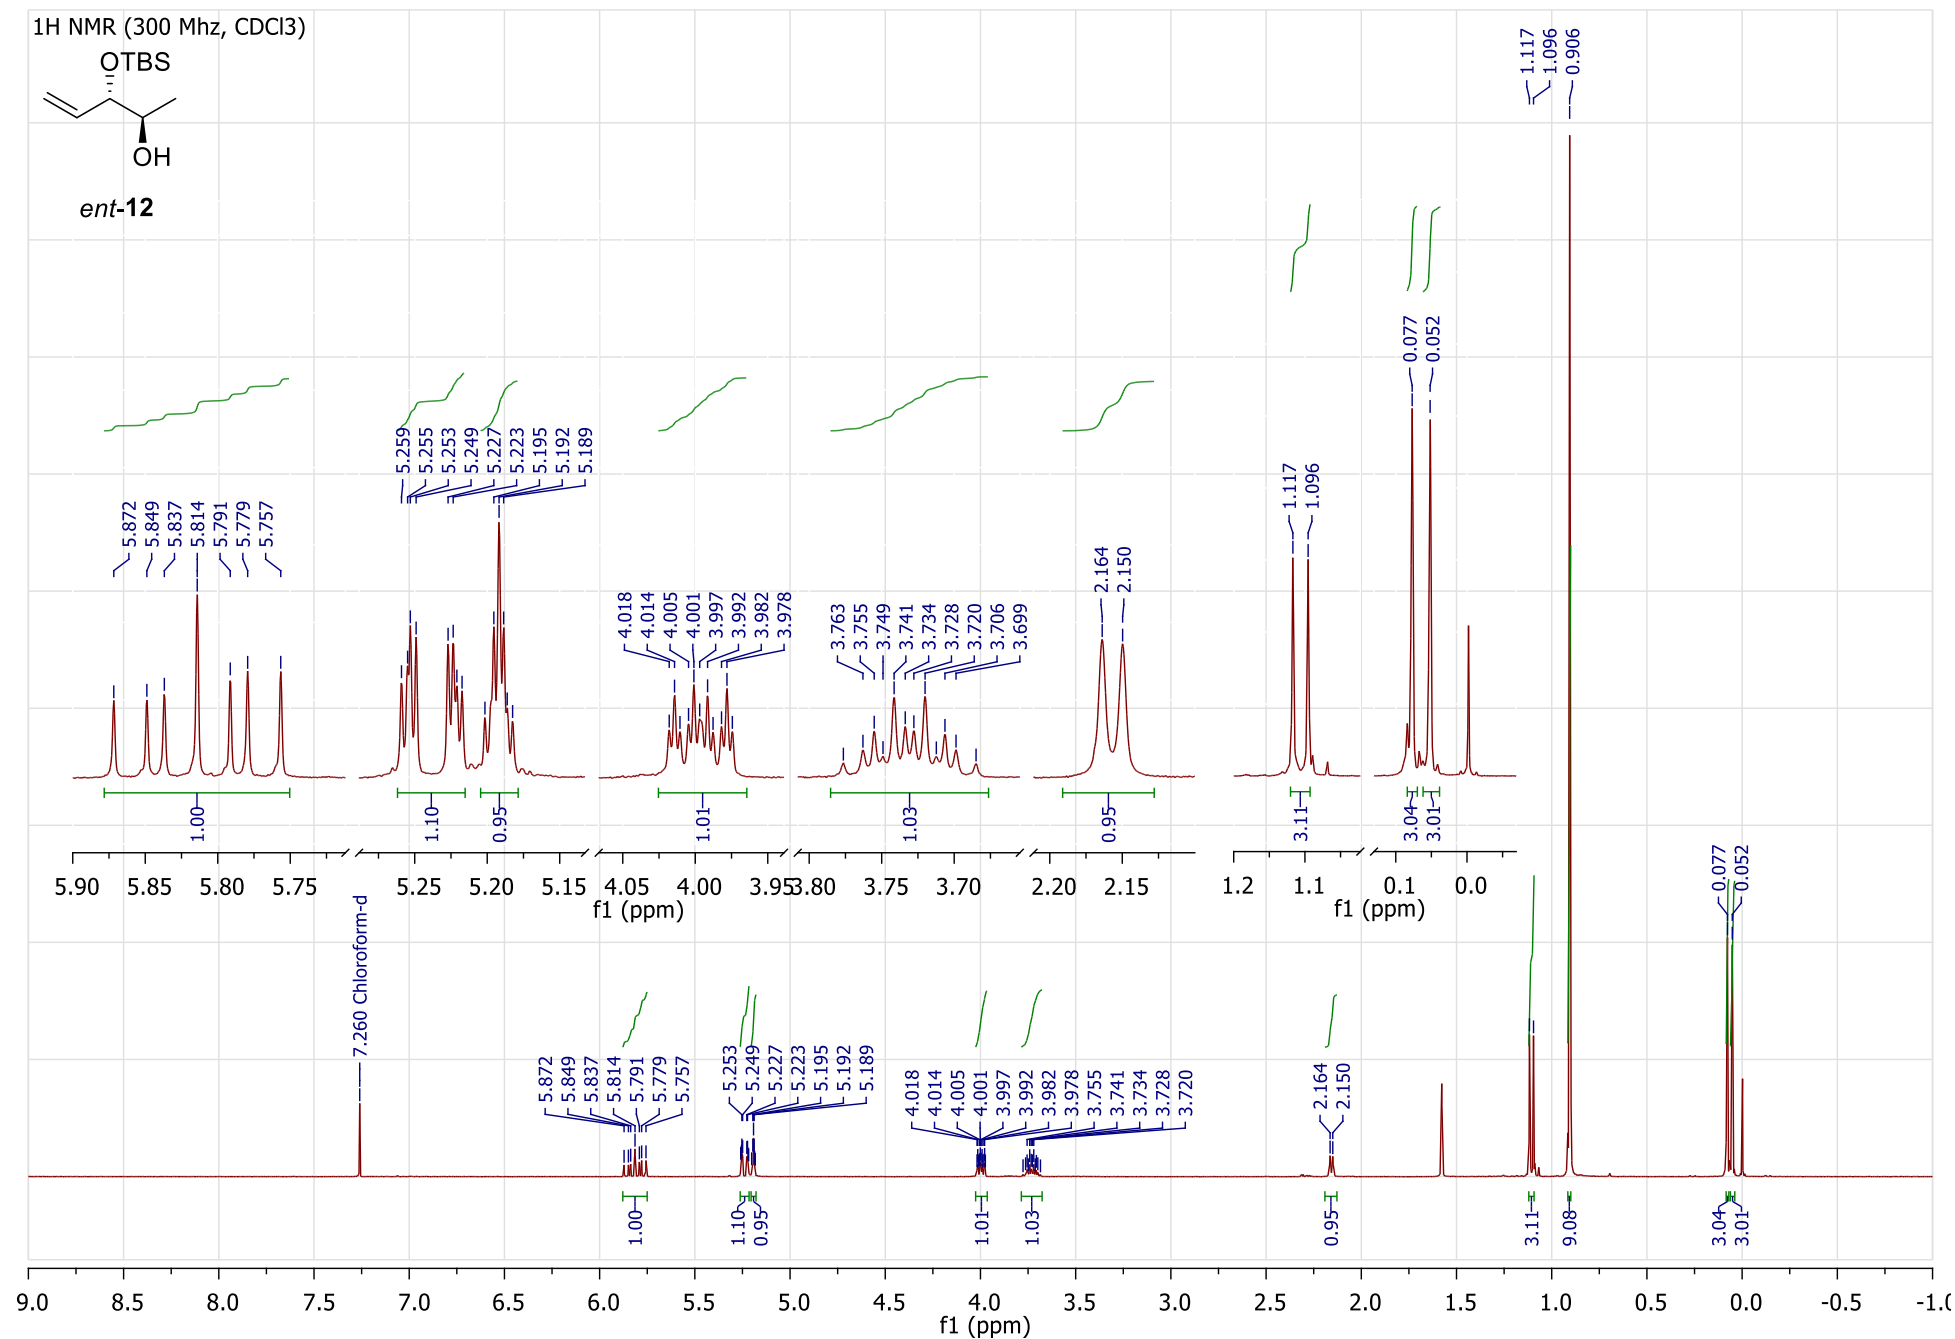

**Figure S16.** <sup>1</sup>H NMR spectrum of **ent-12**.

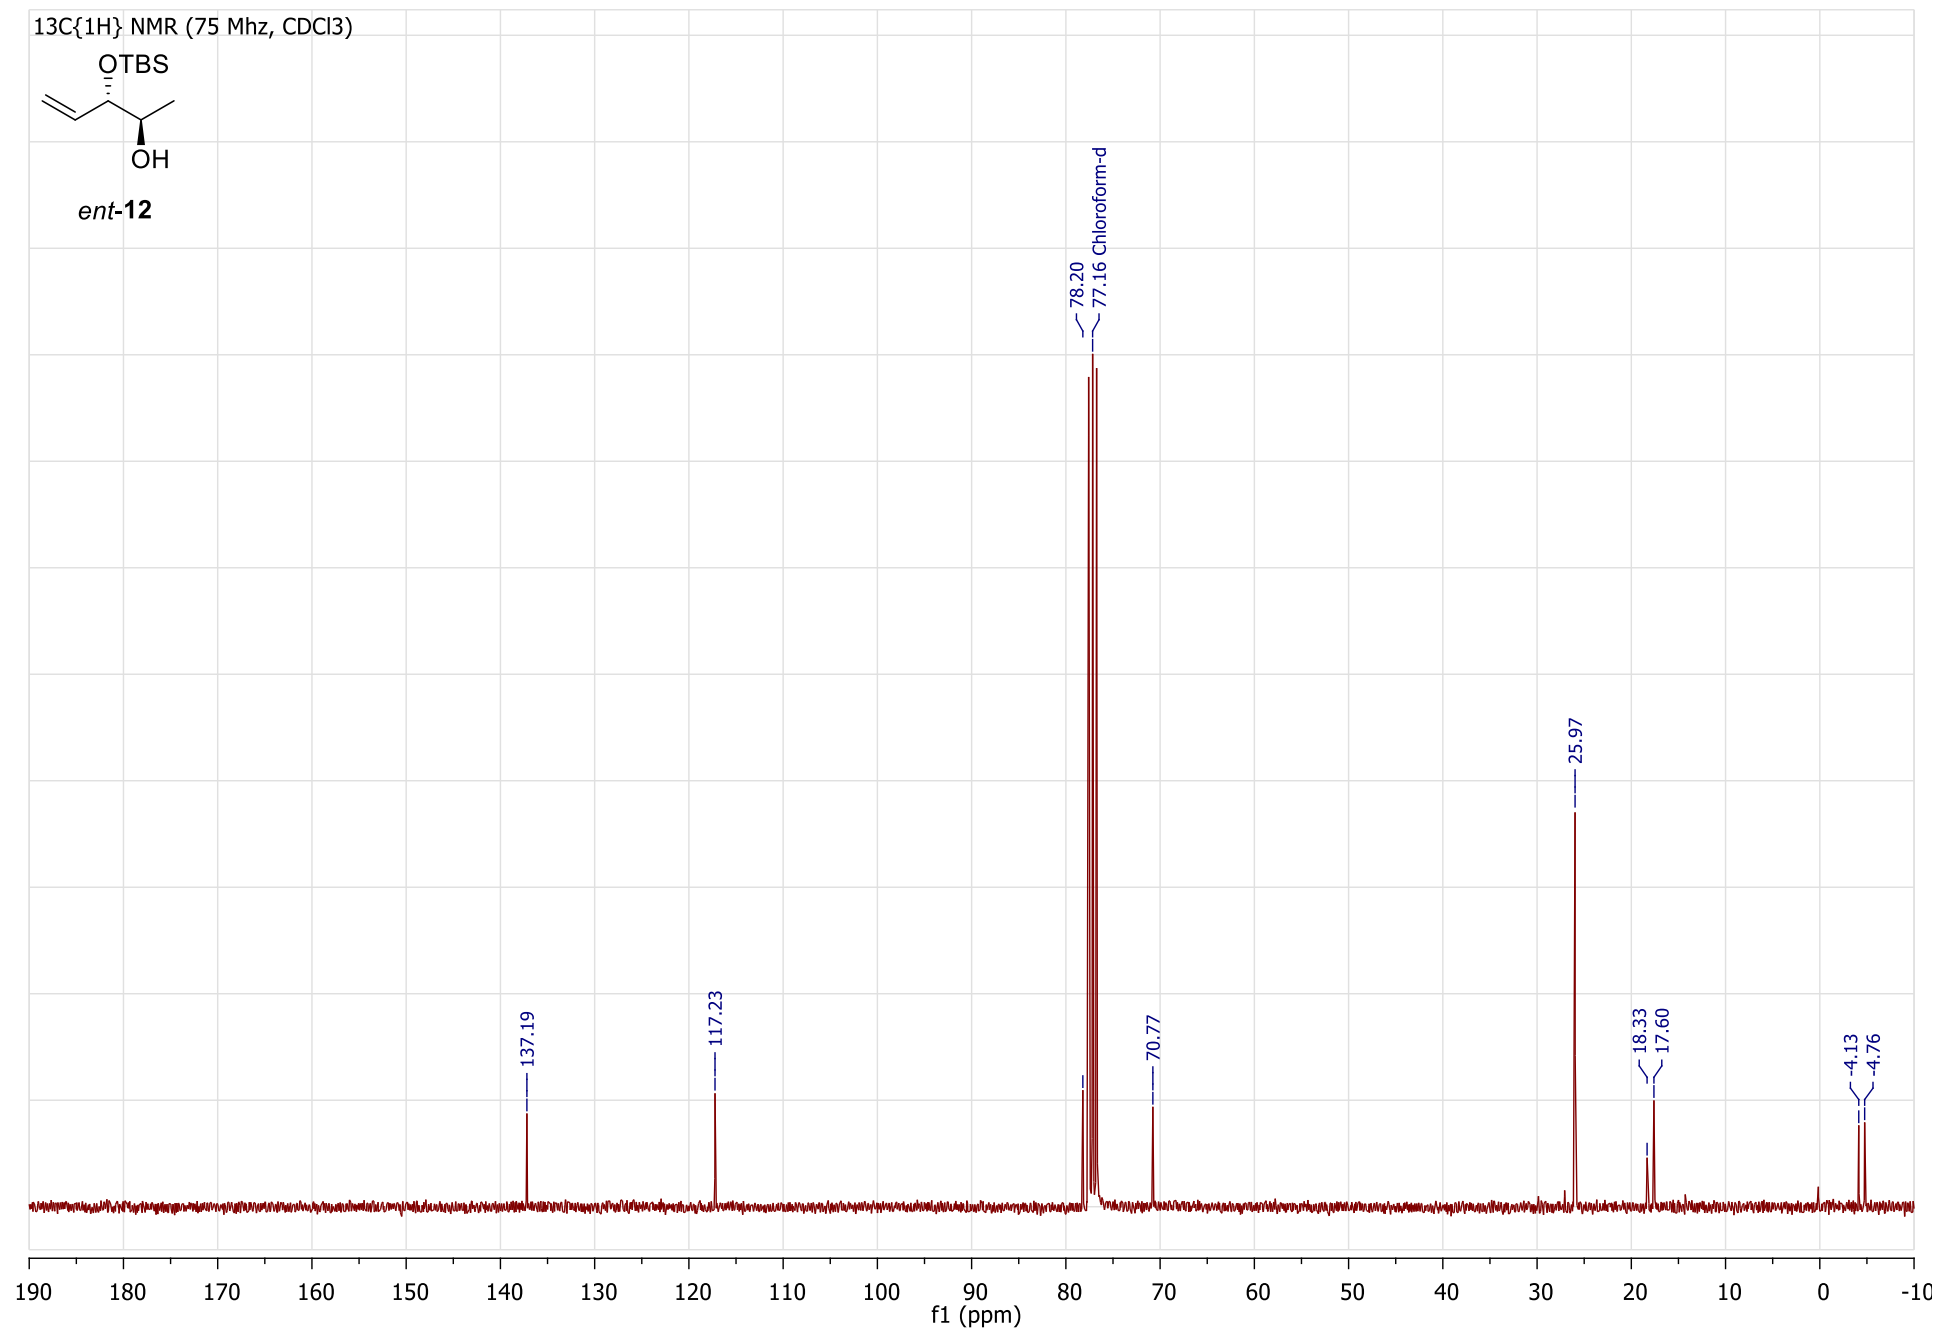

Figure S17.  $^{13}\text{C}$  NMR spectrum of *ent*-12.



  
**13**

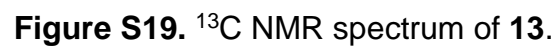

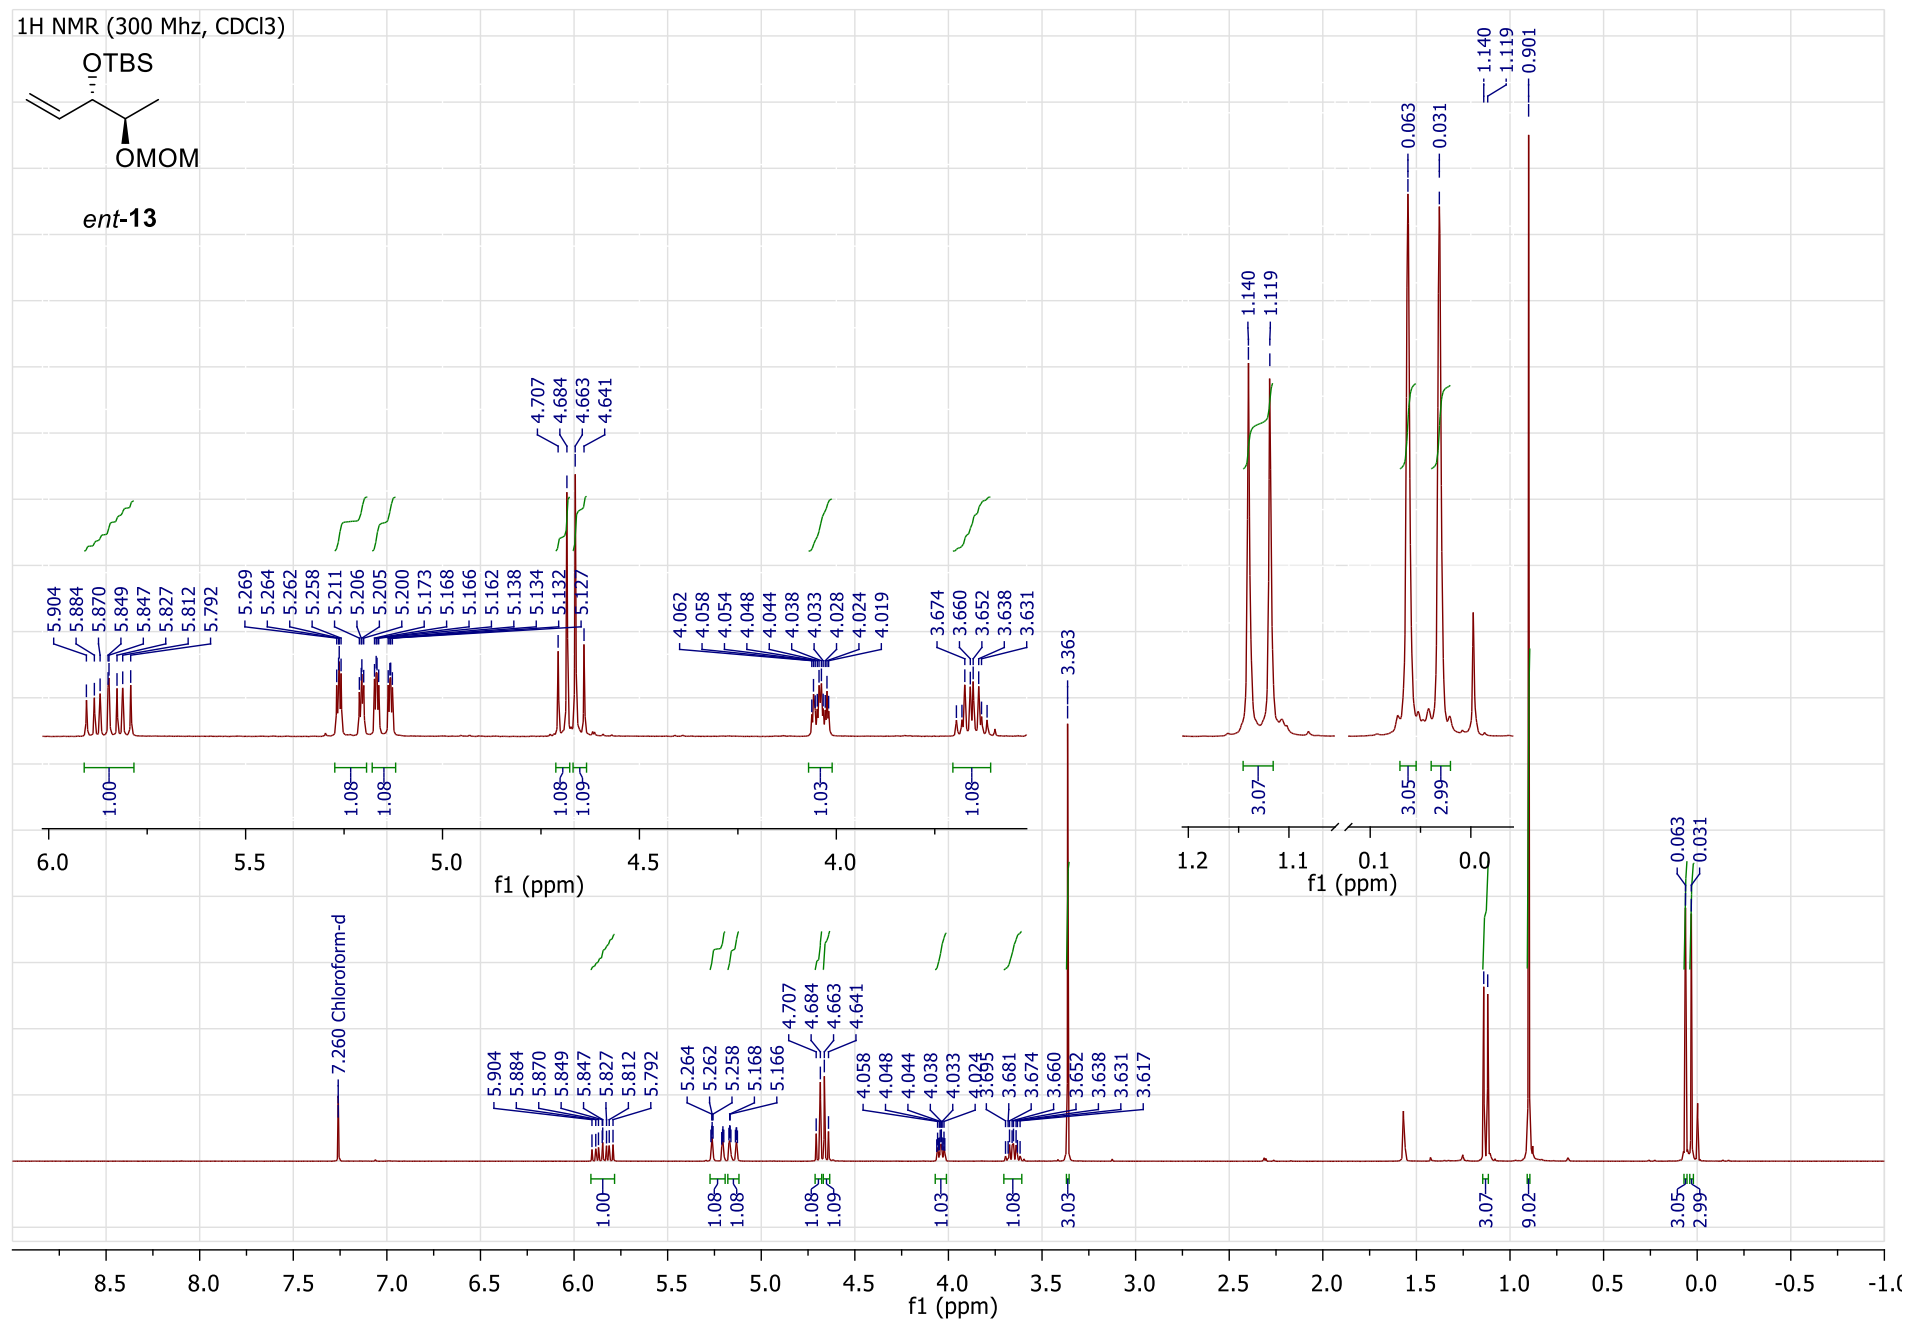

Figure S20. <sup>1</sup>H NMR spectrum of **ent-13**.

*ent*-**13**

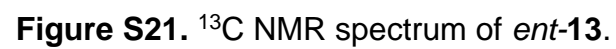

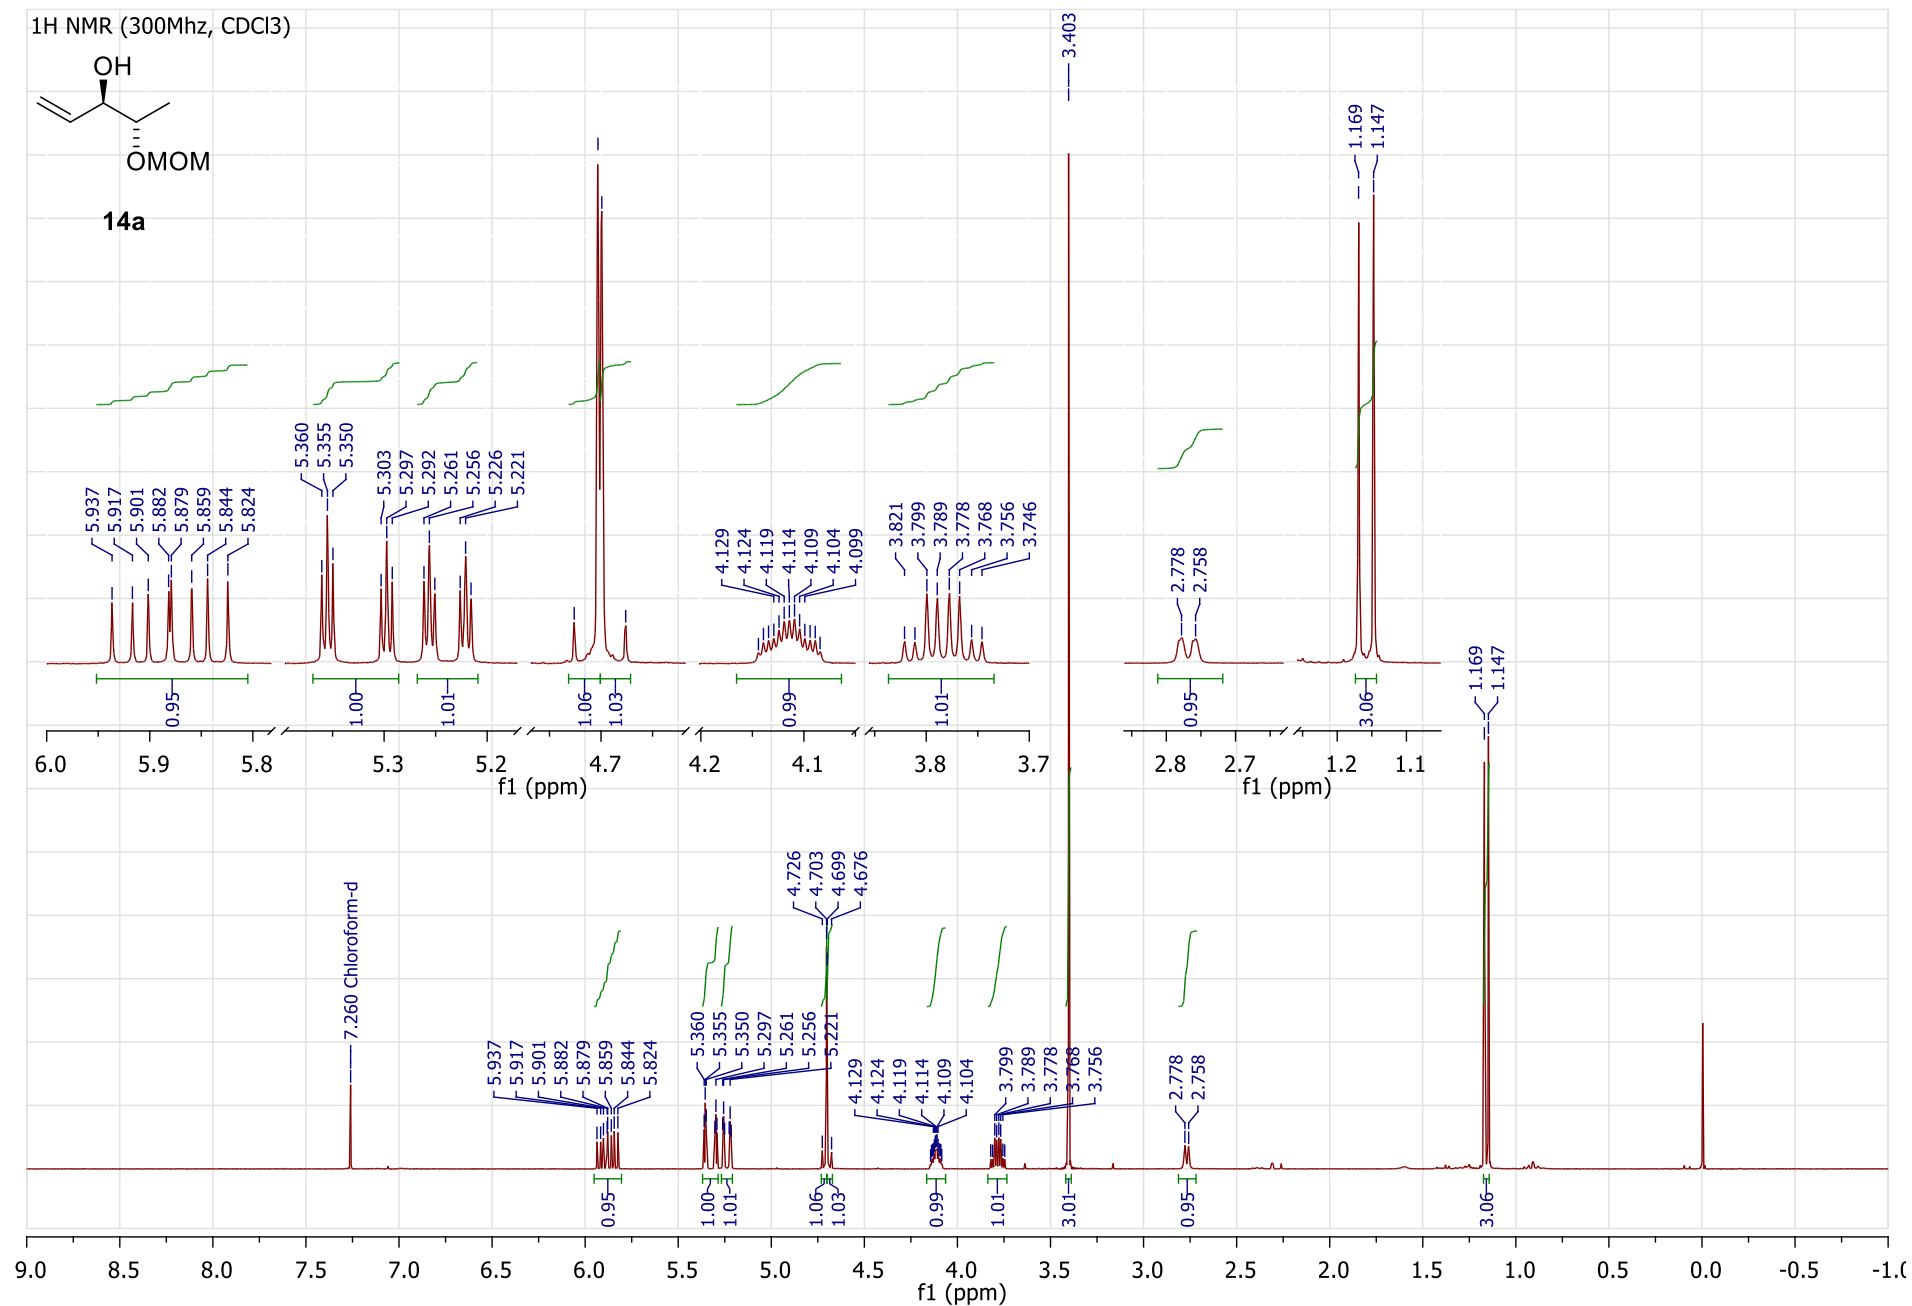

**Figure S22.** <sup>1</sup>H NMR spectrum of **14a**.

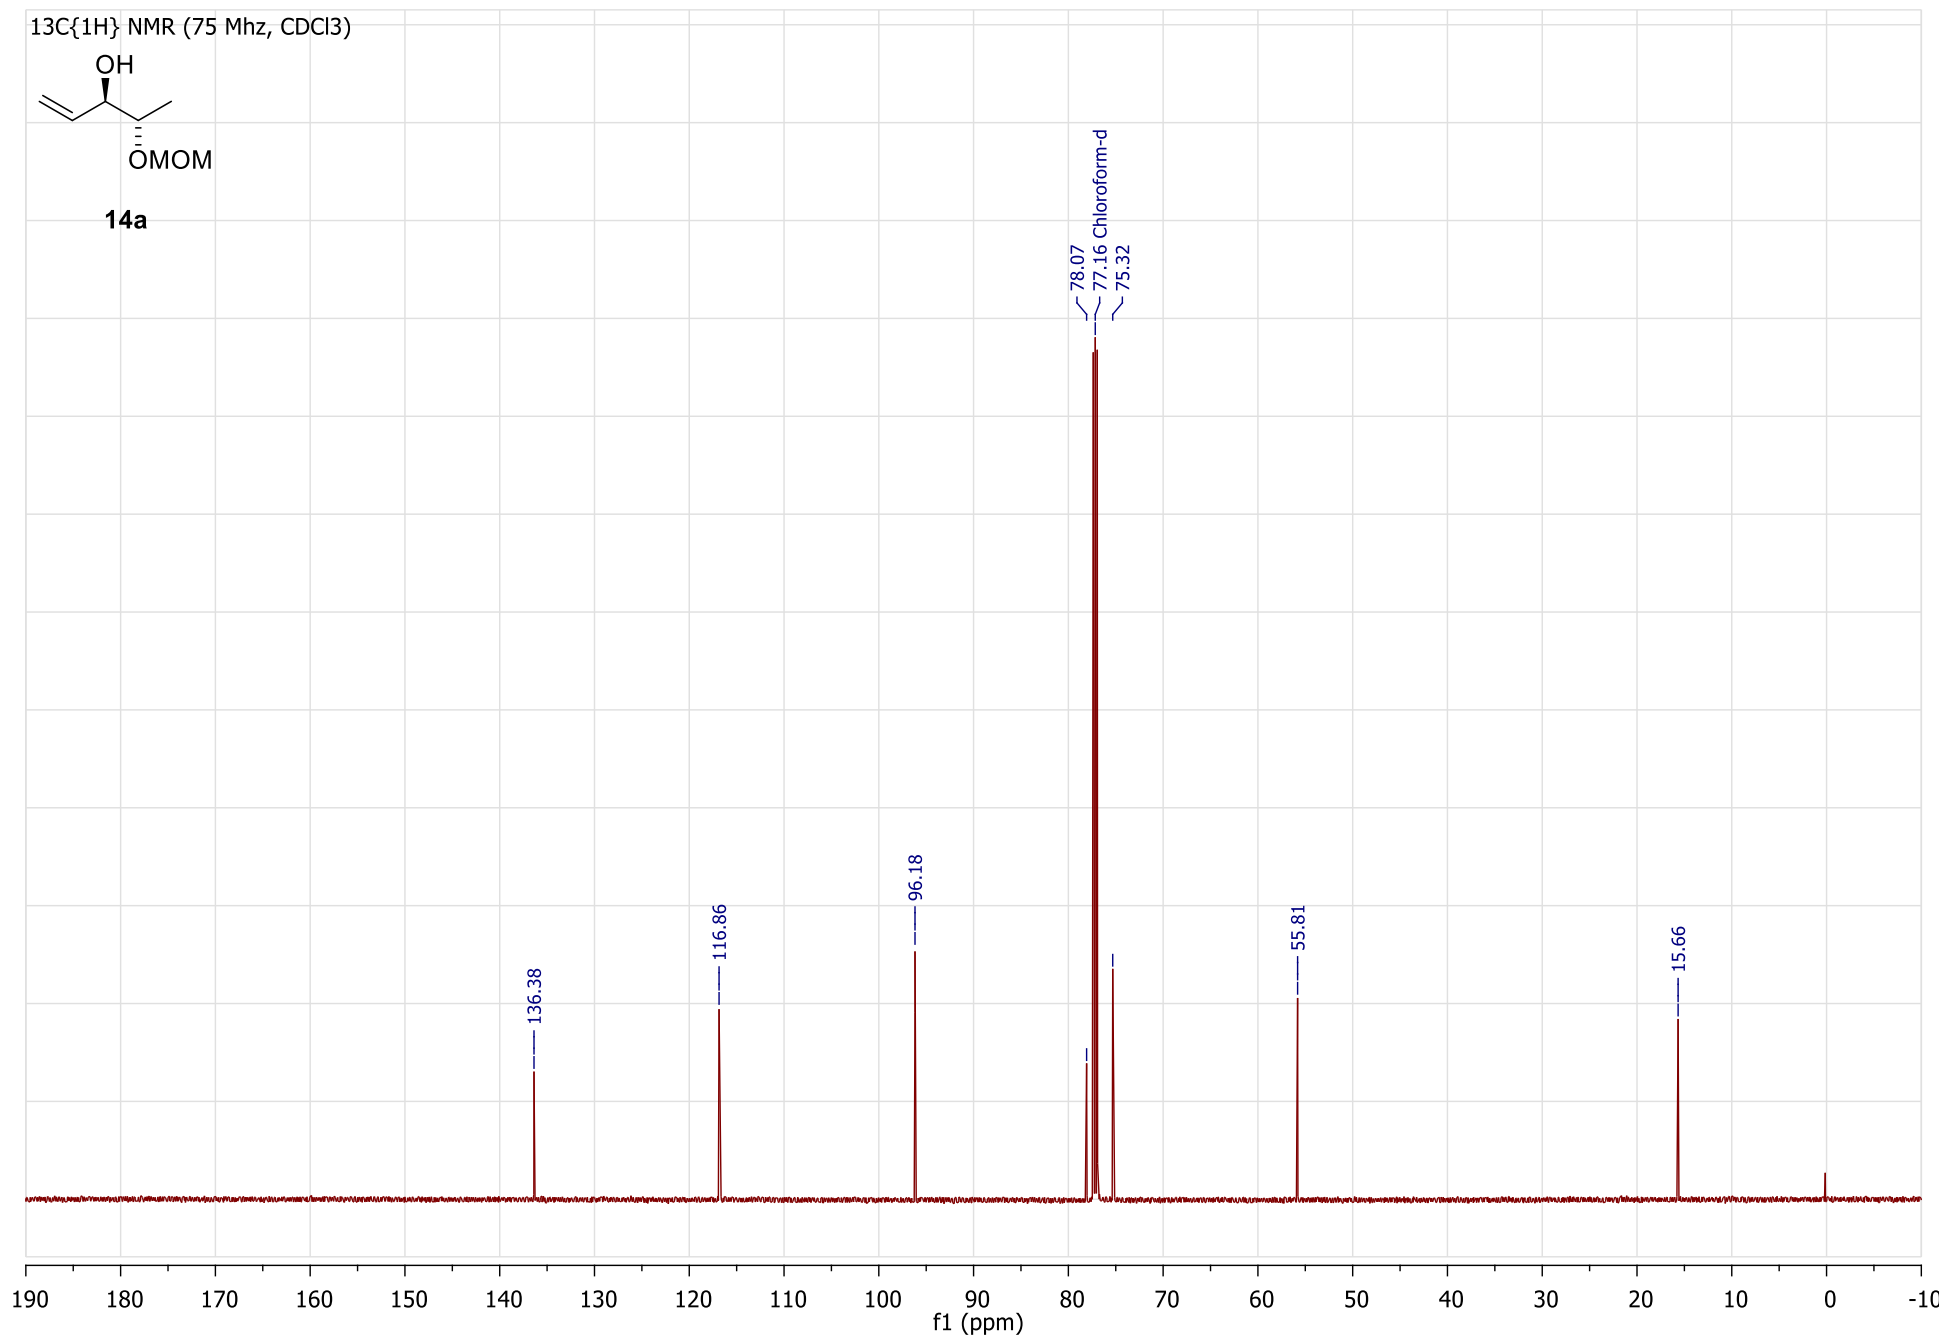

**Figure S23.** <sup>13</sup>C NMR spectrum of **14a**.



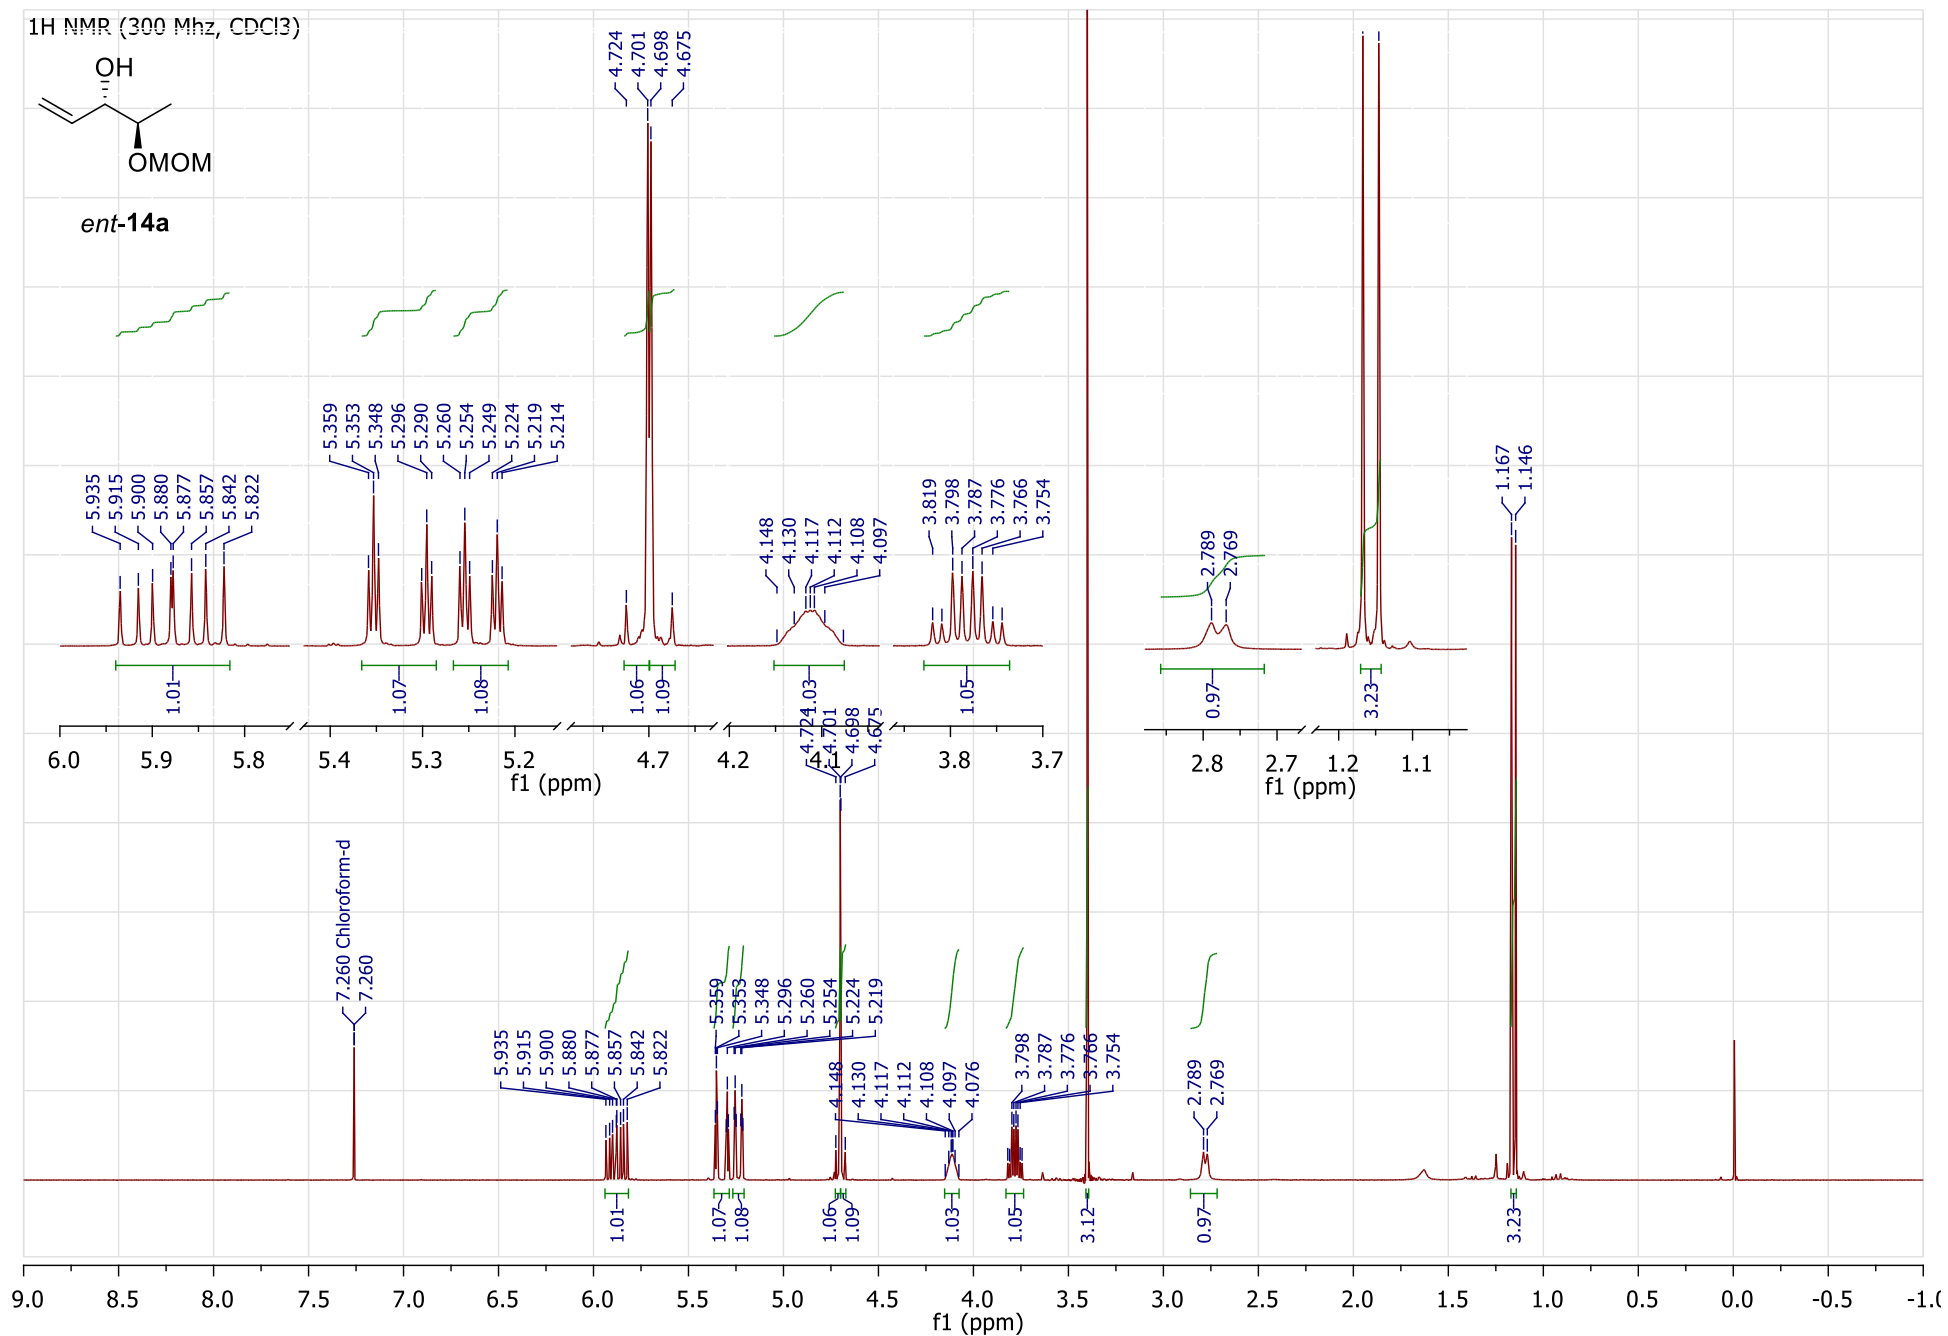

Figure S24. <sup>1</sup>H NMR spectrum of *ent*-14a.

$^{13}\text{C}\{^1\text{H}\}$  NMR (75 MHz,  $\text{CDCl}_3$ )

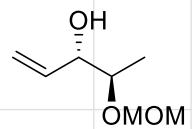

*ent*-14a

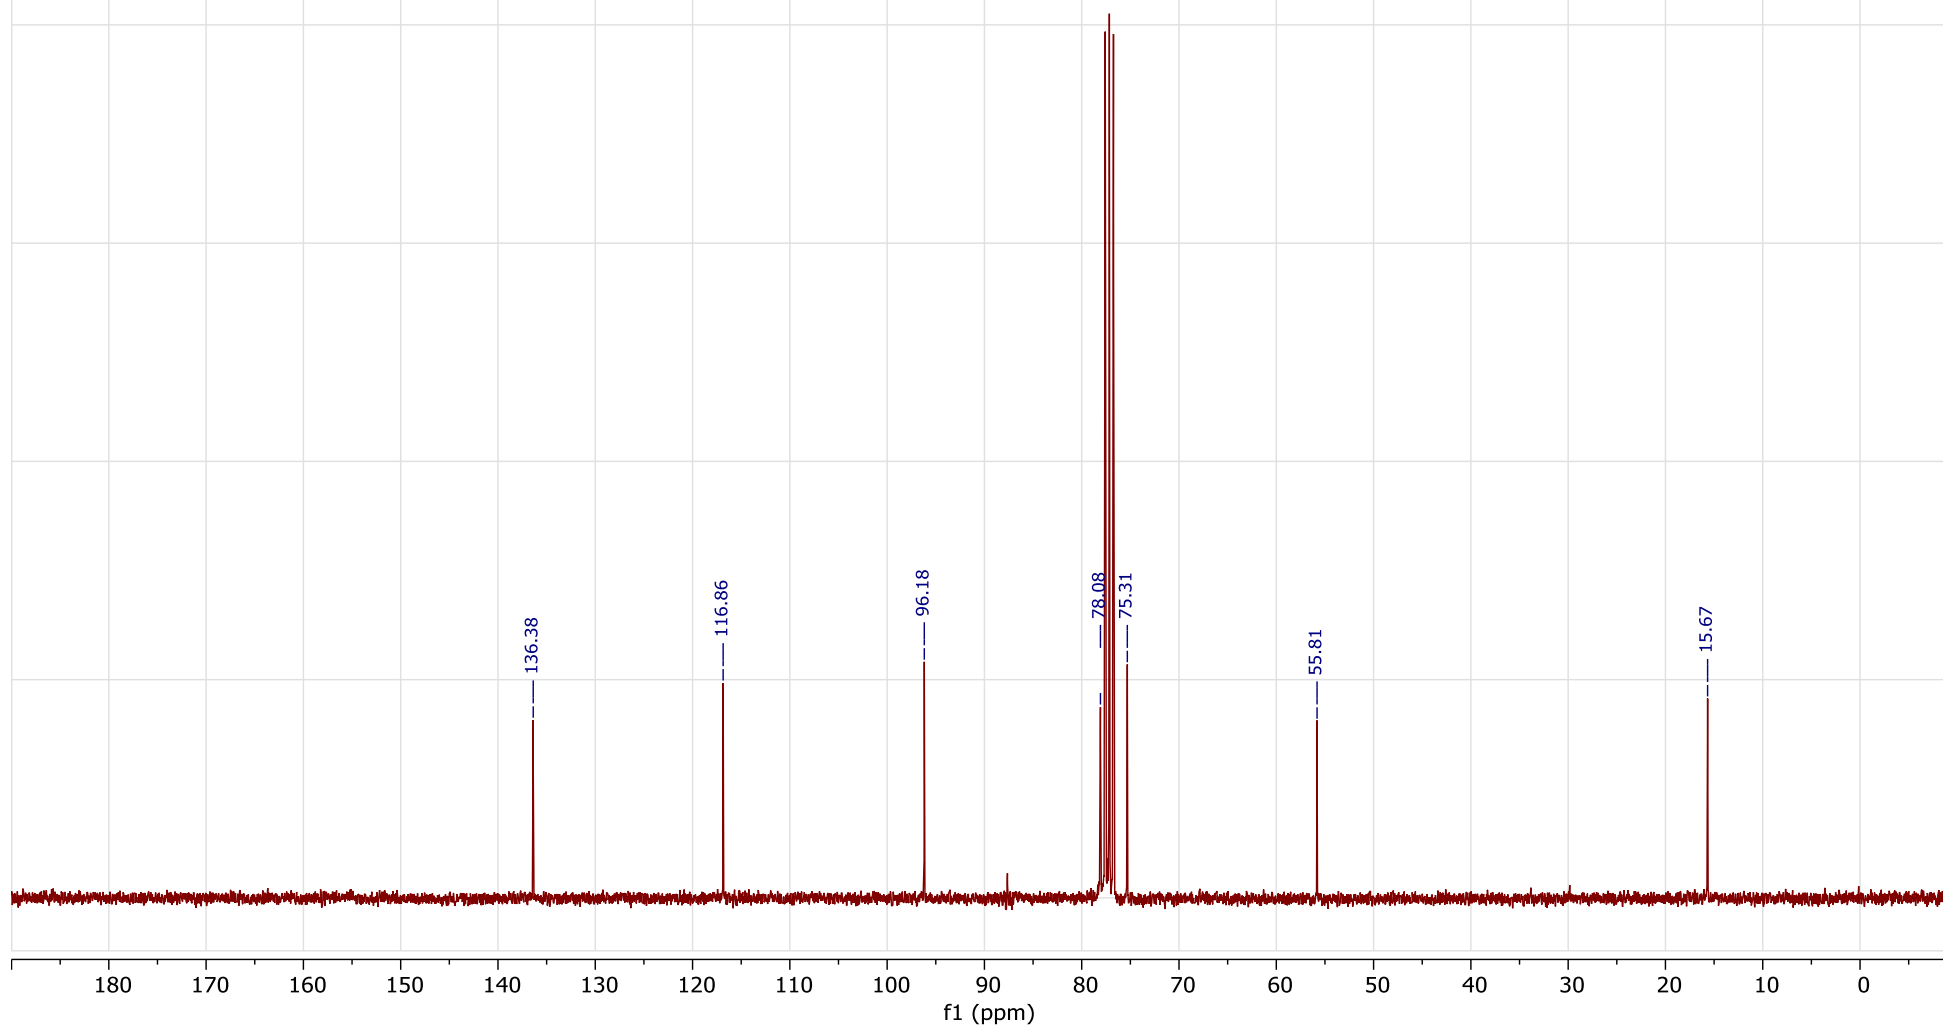

Figure S25.  $^{13}\text{C}$  NMR spectrum of *ent*-14a.

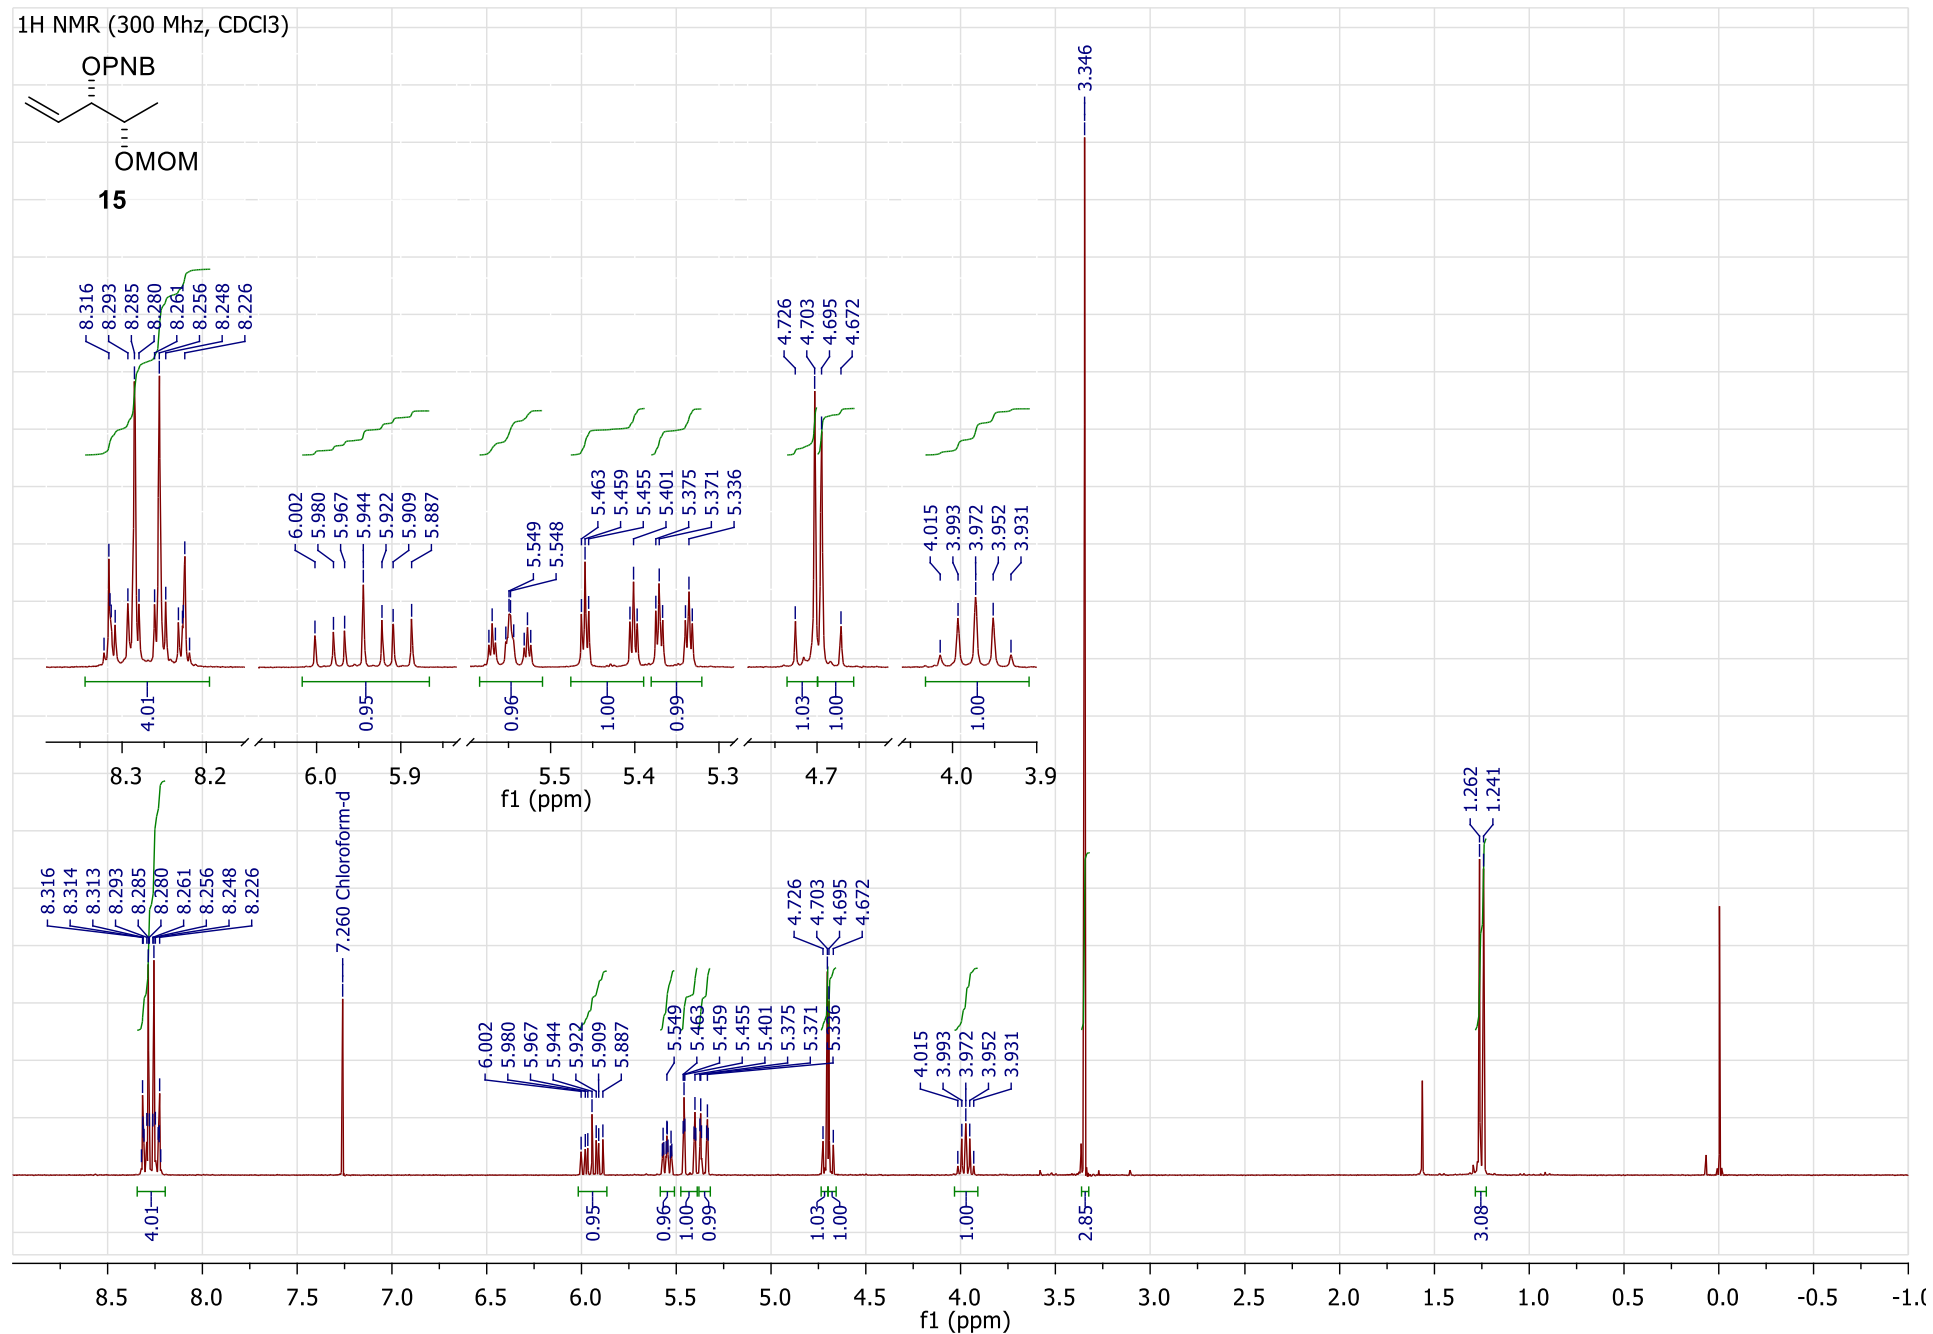

Figure S26. <sup>1</sup>H NMR spectrum of **15**.

$^{13}\text{C}\{^1\text{H}\}$  NMR (75 Mhz,  $\text{CDCl}_3$ )

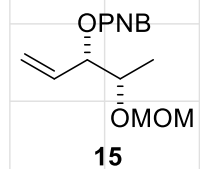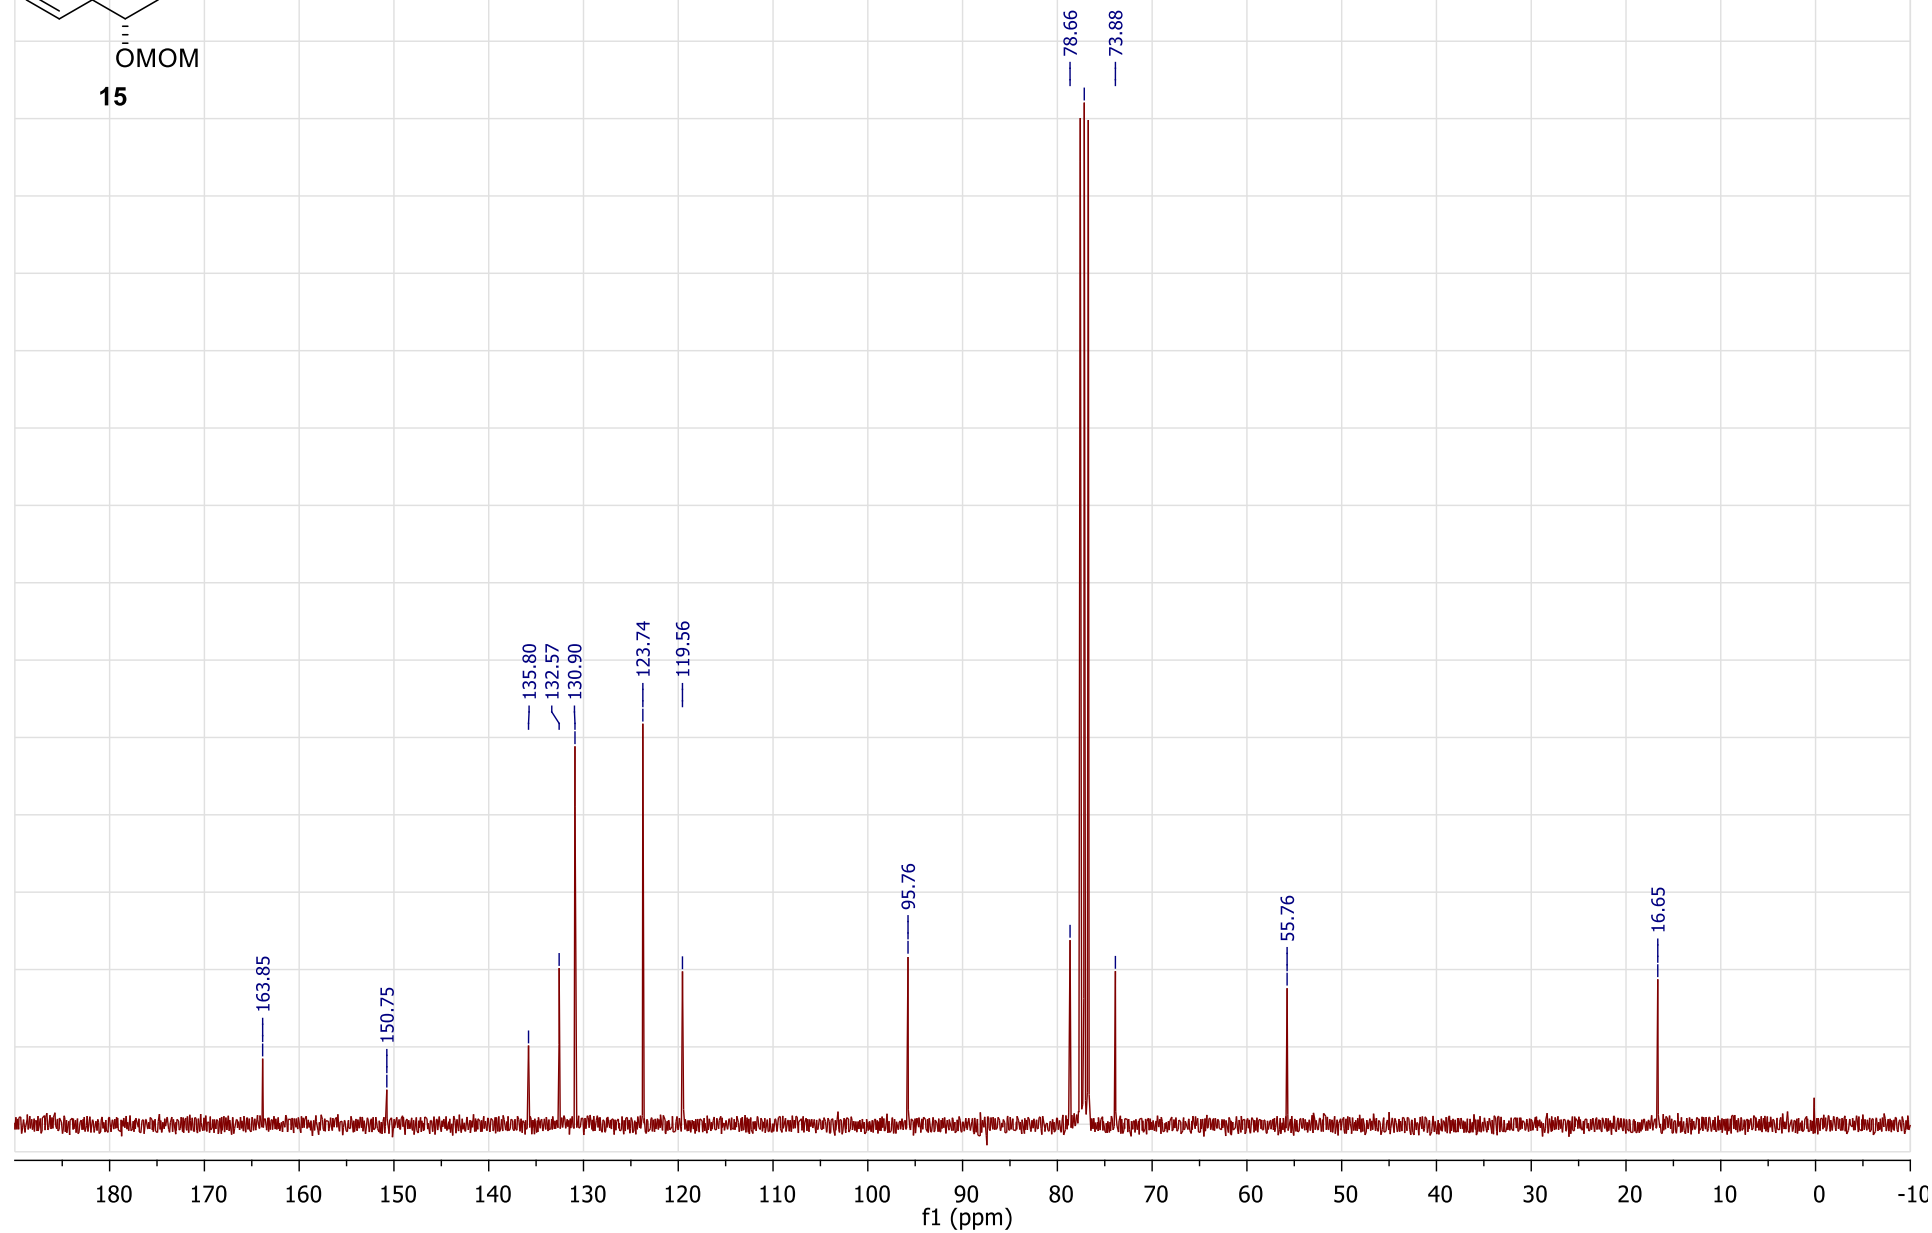

Figure S27.  $^{13}\text{C}$  NMR spectrum of **15**.

<sup>1</sup>H NMR (300 Mhz, CDCl<sub>3</sub>)

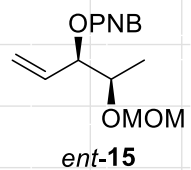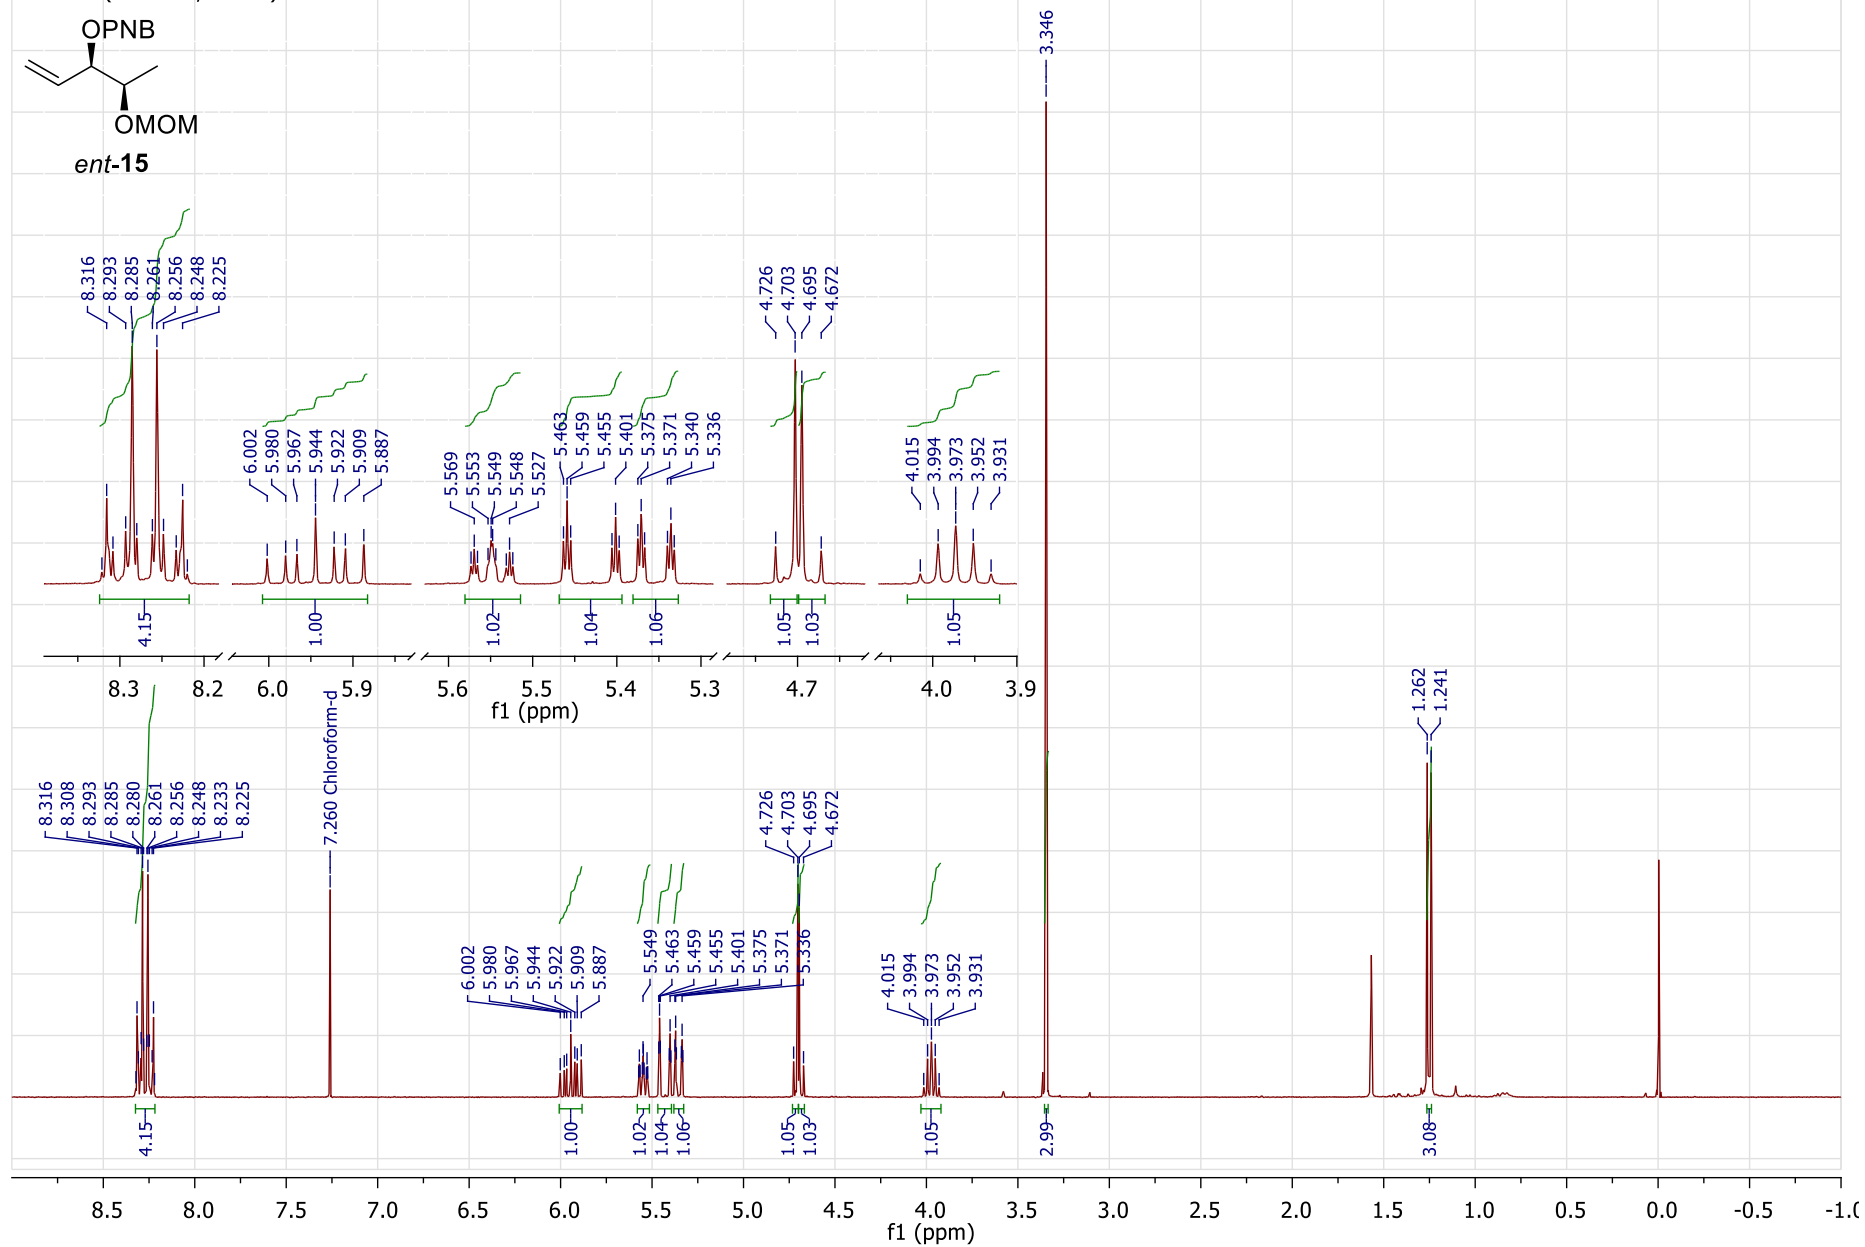

**Figure S28.** <sup>1</sup>H NMR spectrum of **ent-15**.

$^{13}\text{C}\{^1\text{H}\}$  NMR (75 Mhz,  $\text{CDCl}_3$ )

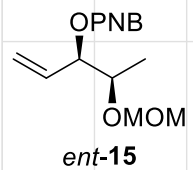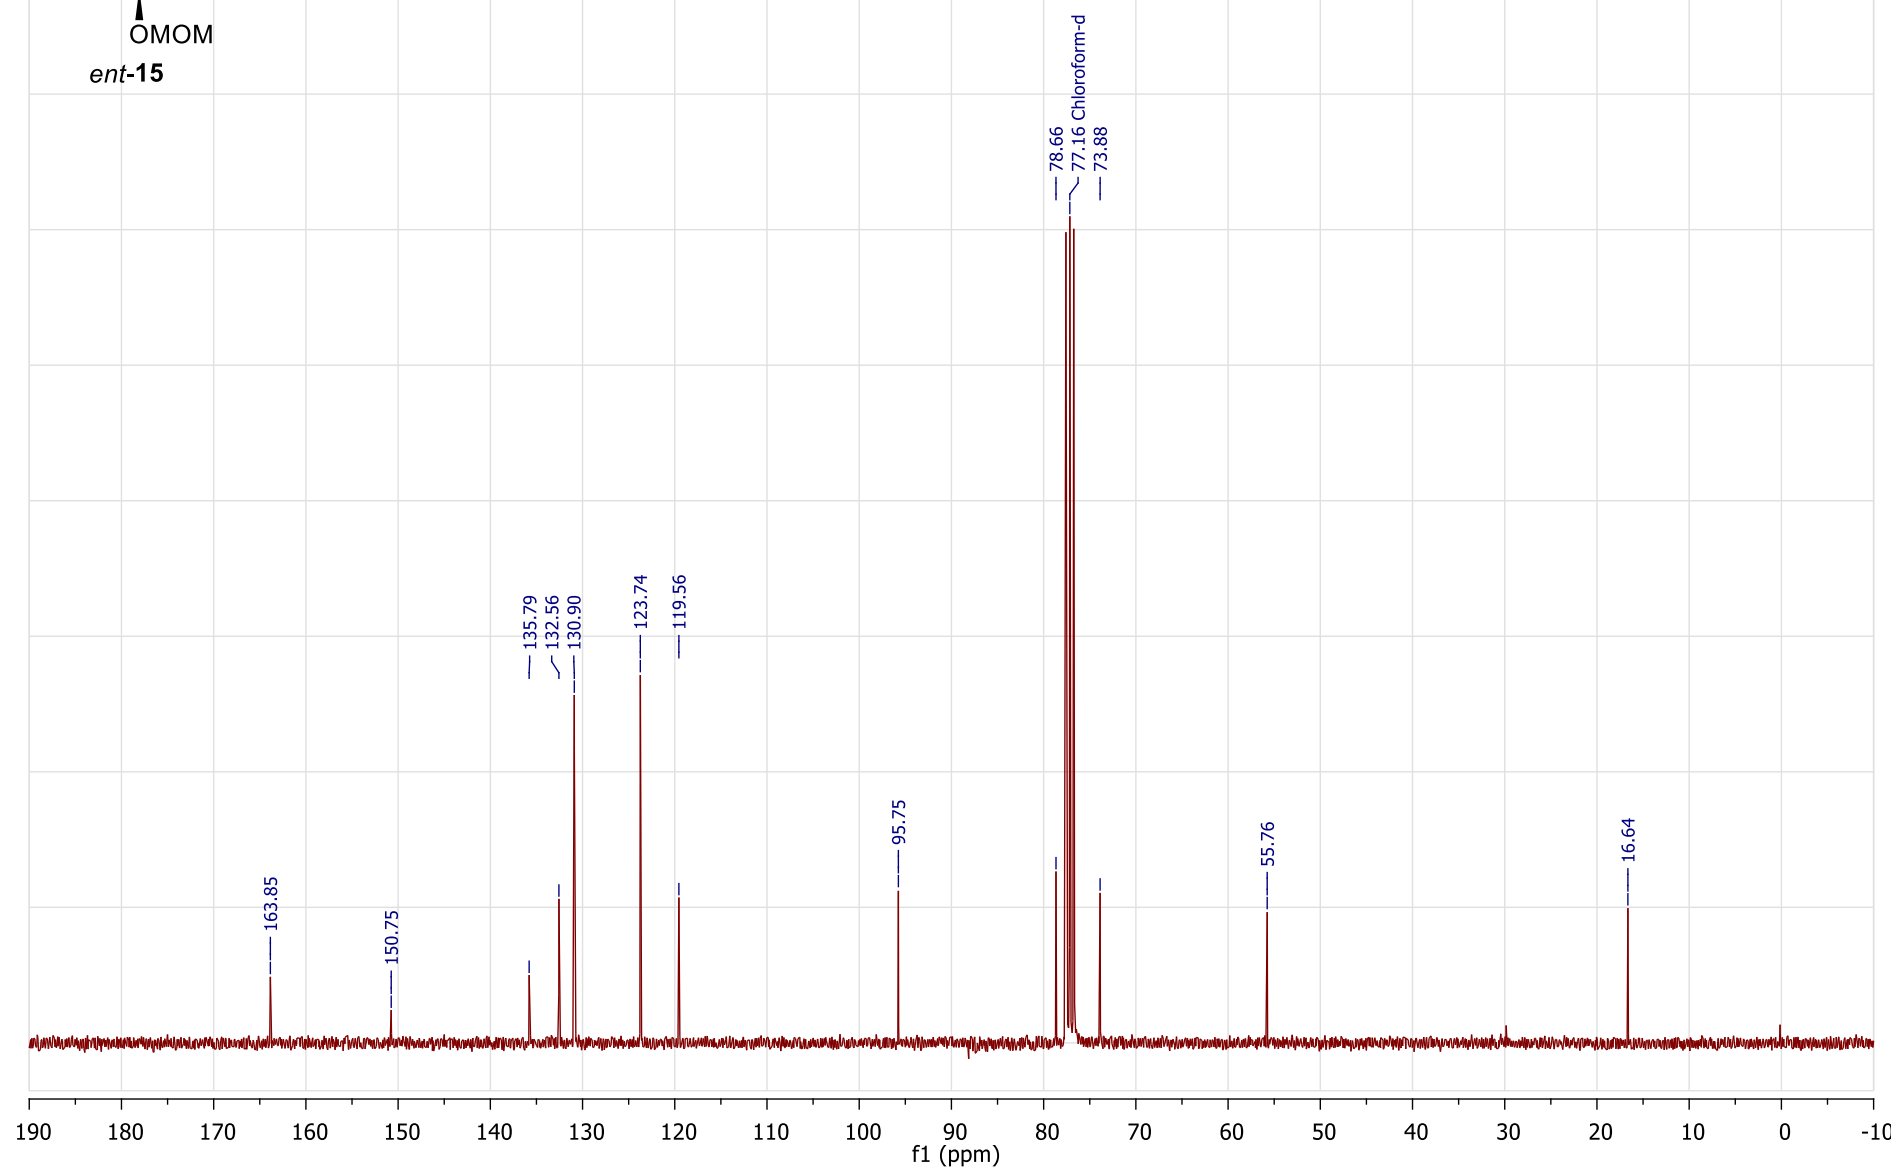

Figure S29.  $^{13}\text{C}$  NMR spectrum of *ent-15*.

<sup>1</sup>H NMR (300 Mhz, CDCl<sub>3</sub>)

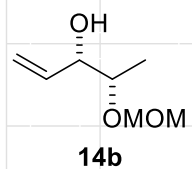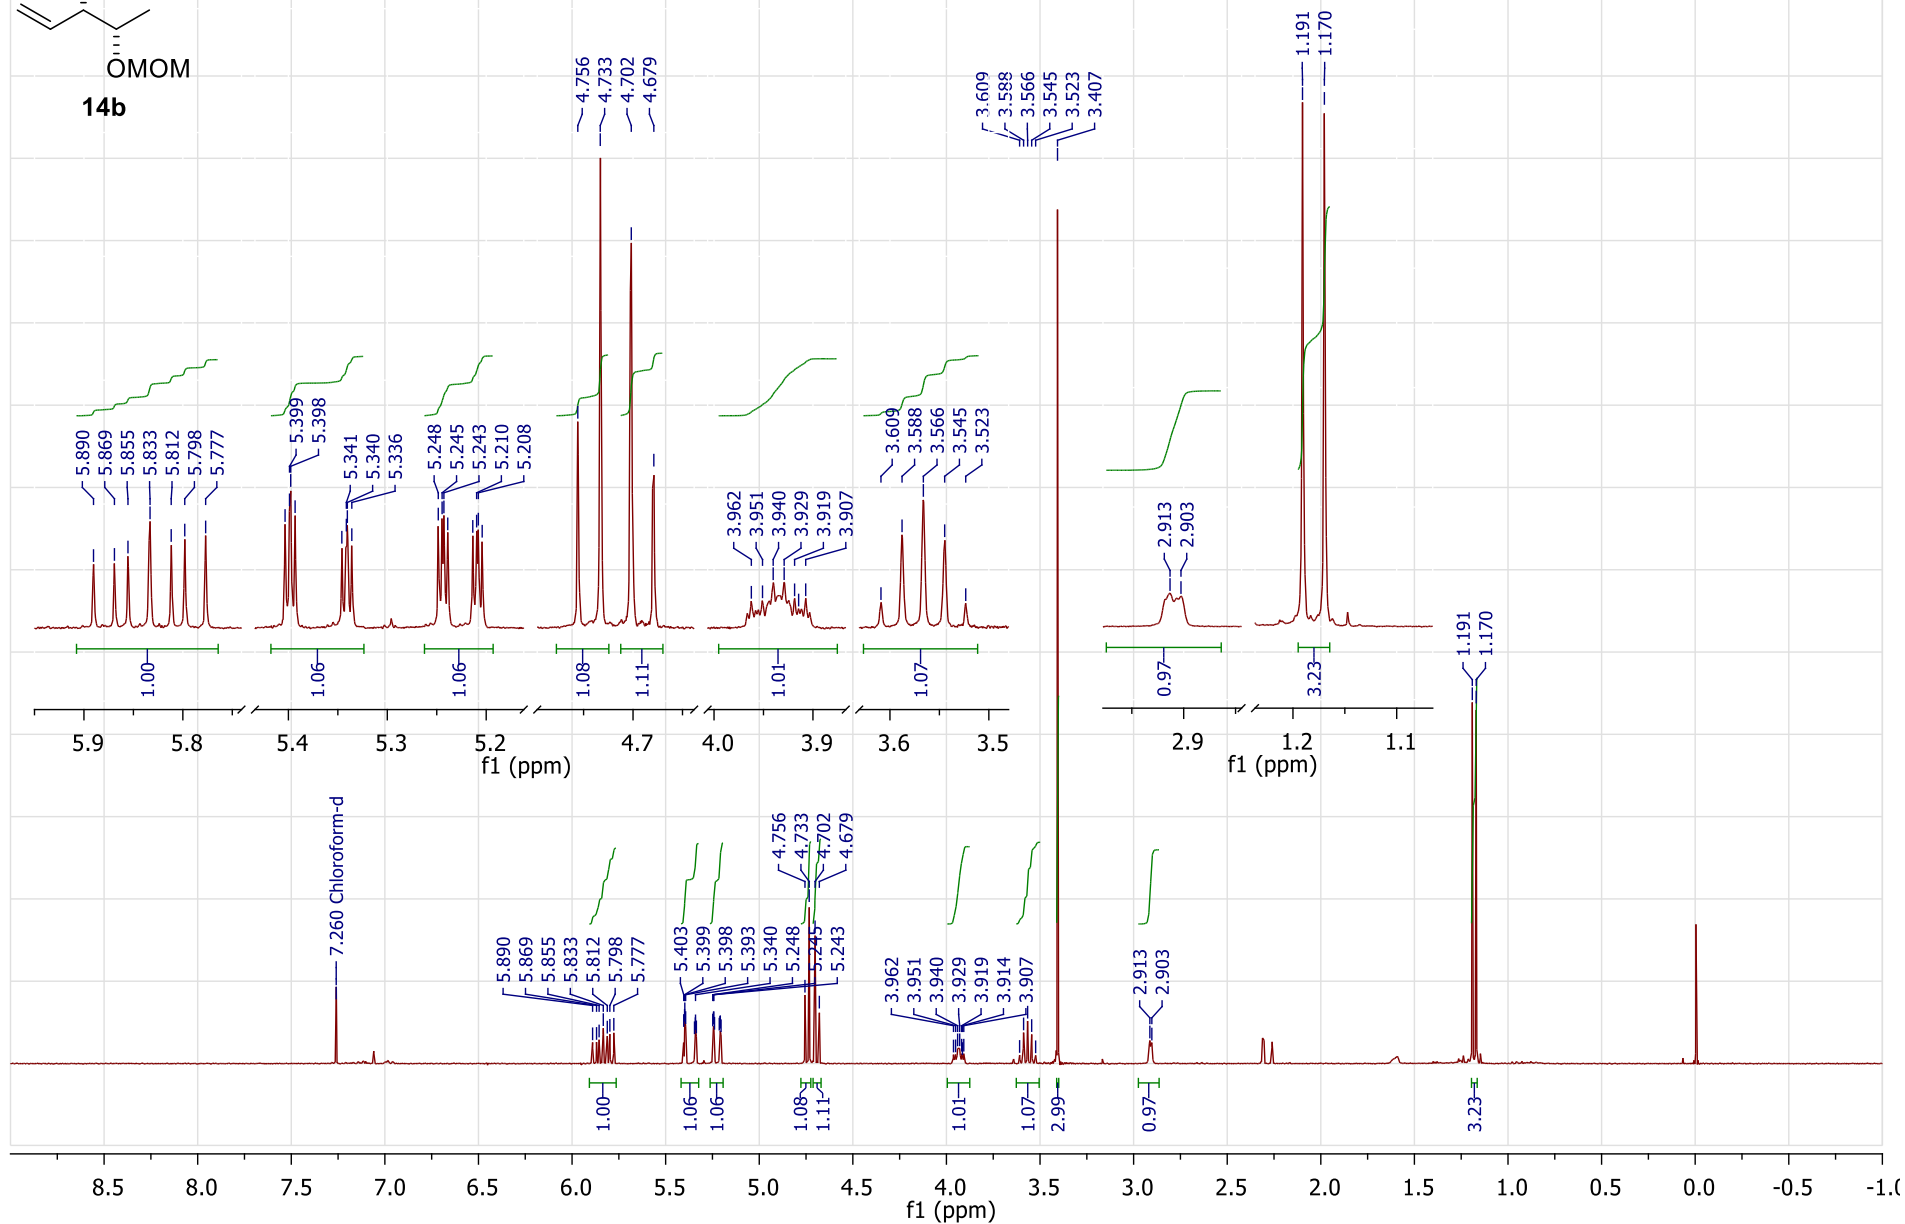

**Figure S30.** <sup>1</sup>H NMR spectrum of **14b**.

$^{13}\text{C}\{^1\text{H}\}$  NMR (75 Mhz,  $\text{CDCl}_3$ )

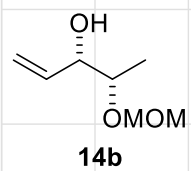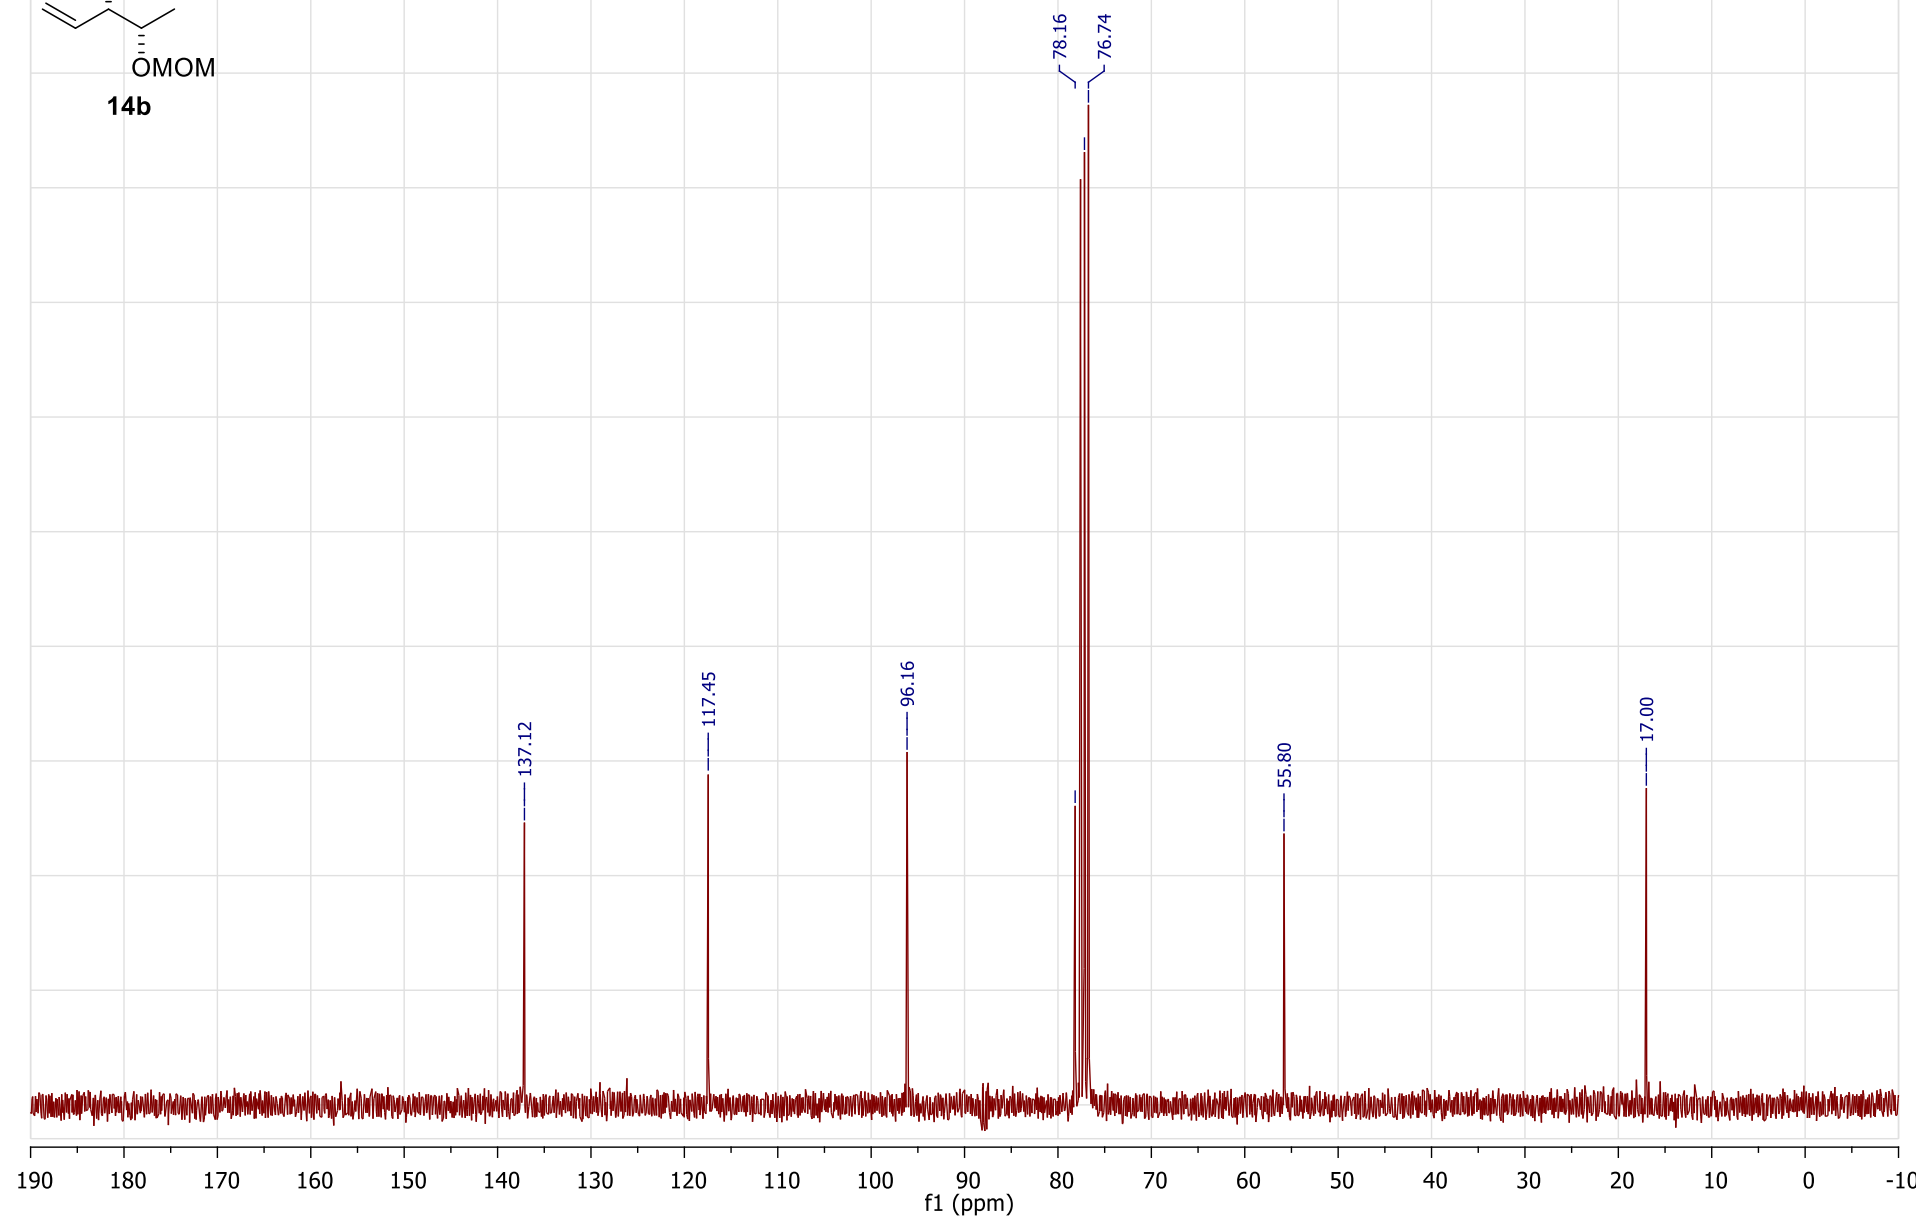

**Figure S31.**  $^{13}\text{C}$  NMR spectrum of **14b**.



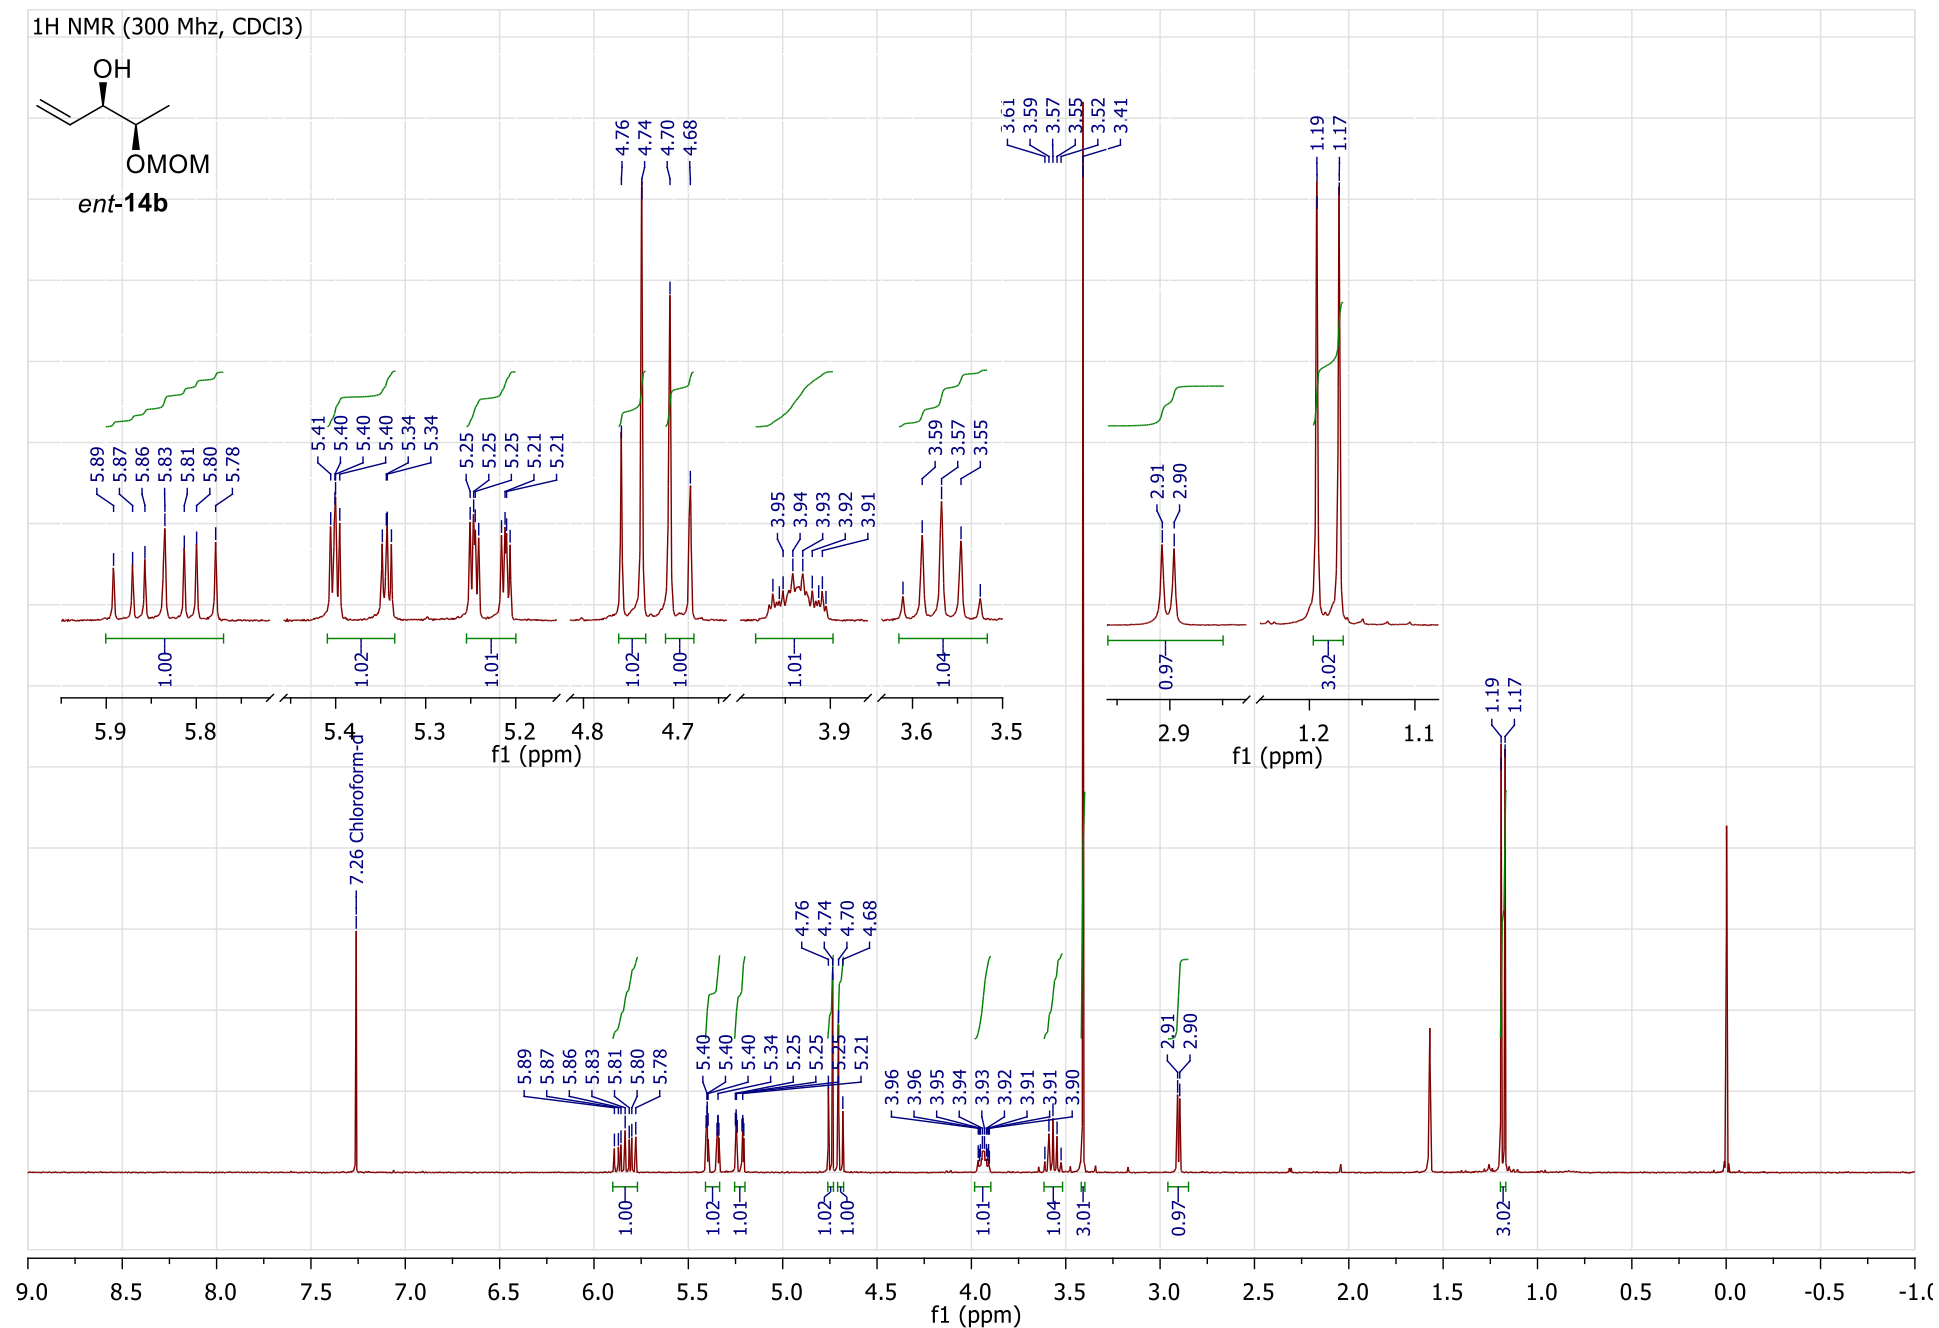

Figure S32. <sup>1</sup>H NMR spectrum of **ent-14b**.

$^{13}\text{C}\{^1\text{H}\}$  NMR (75 Mhz,  $\text{CDCl}_3$ )

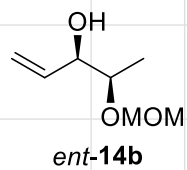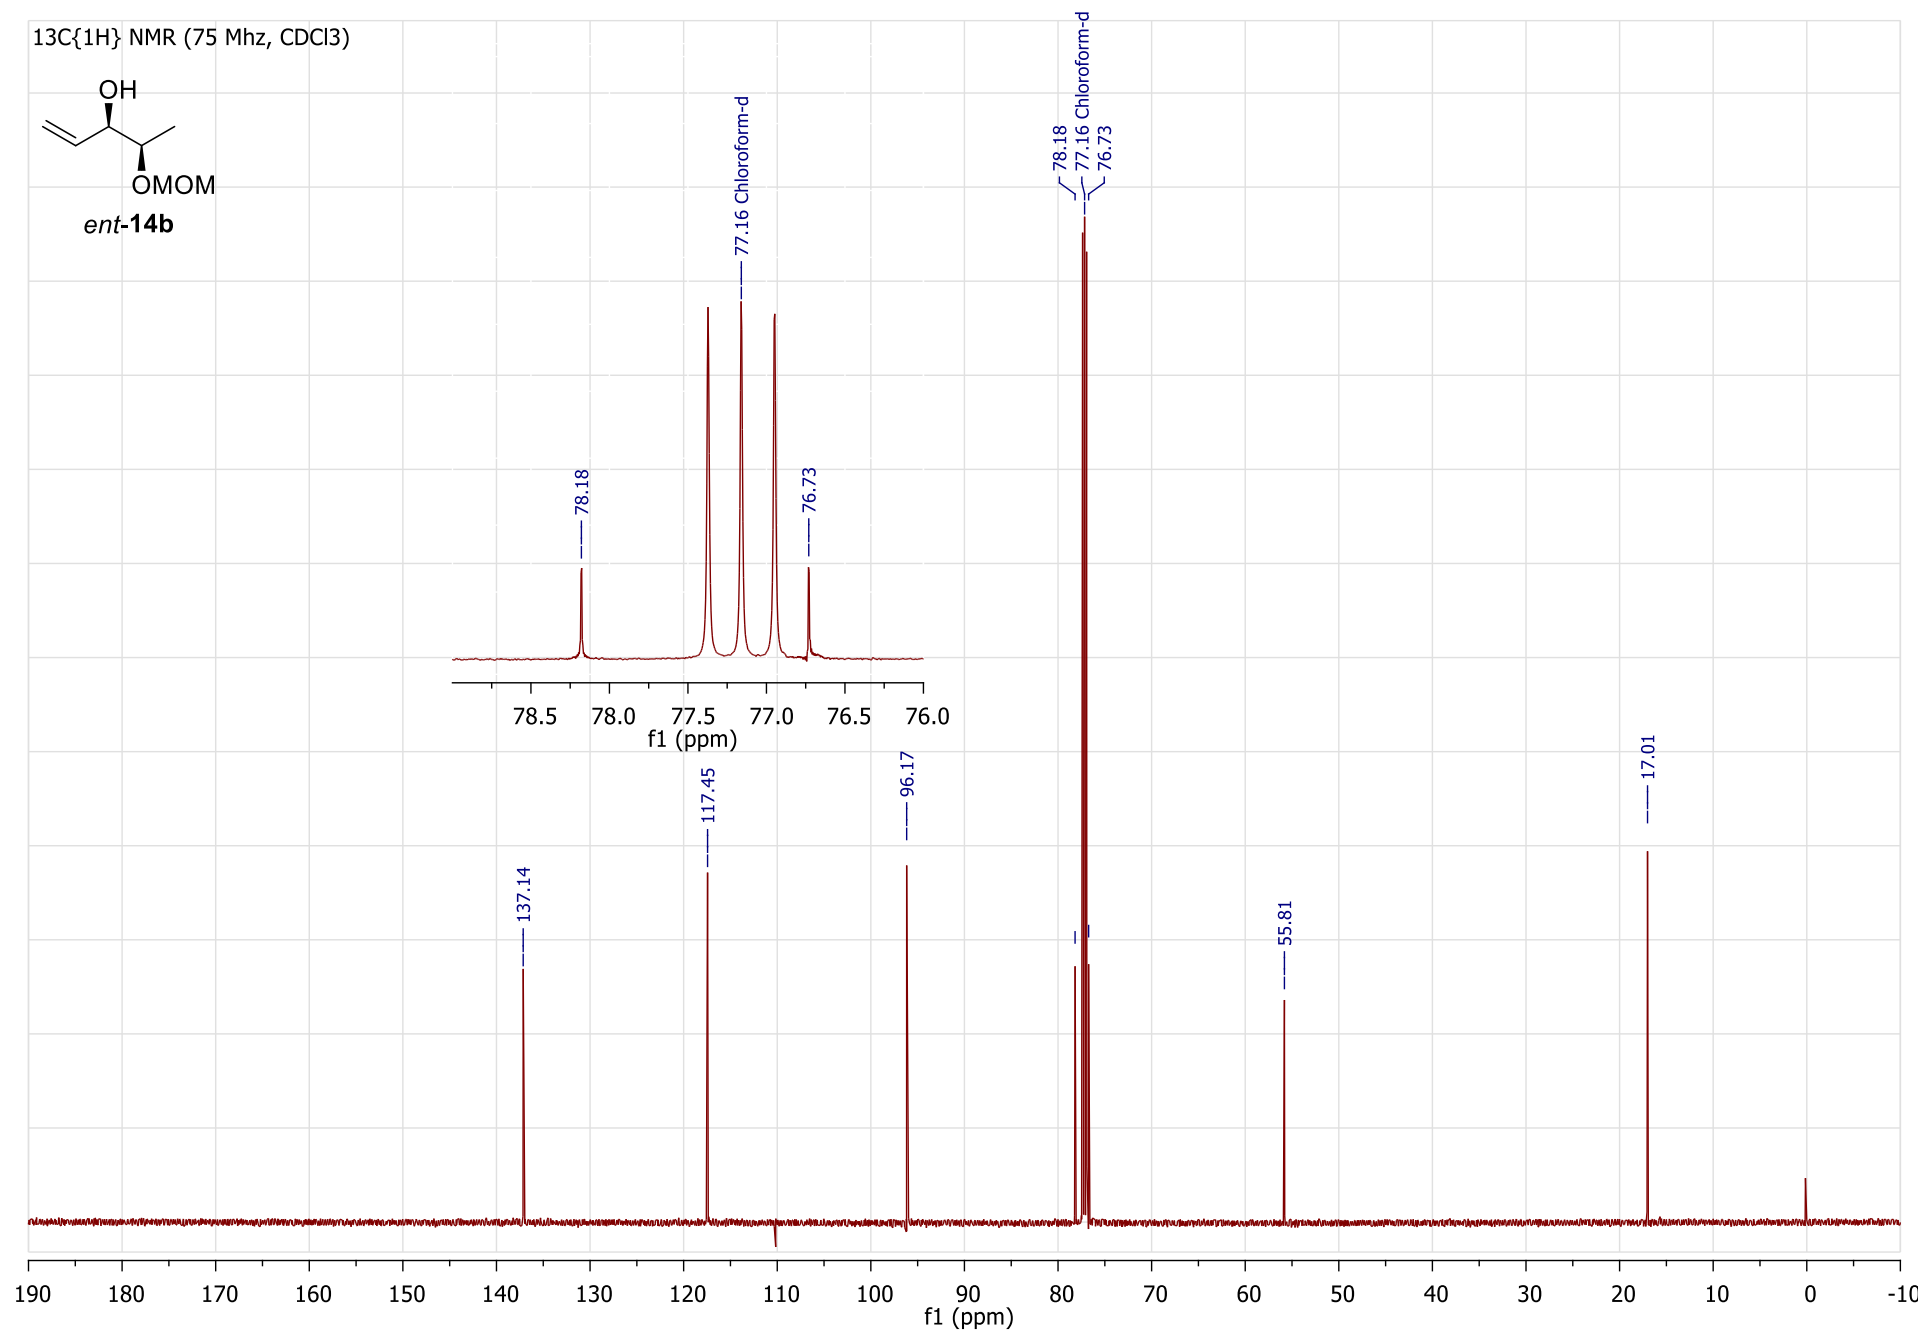

Figure S33.  $^{13}\text{C}$  NMR spectrum of *ent*-14b.

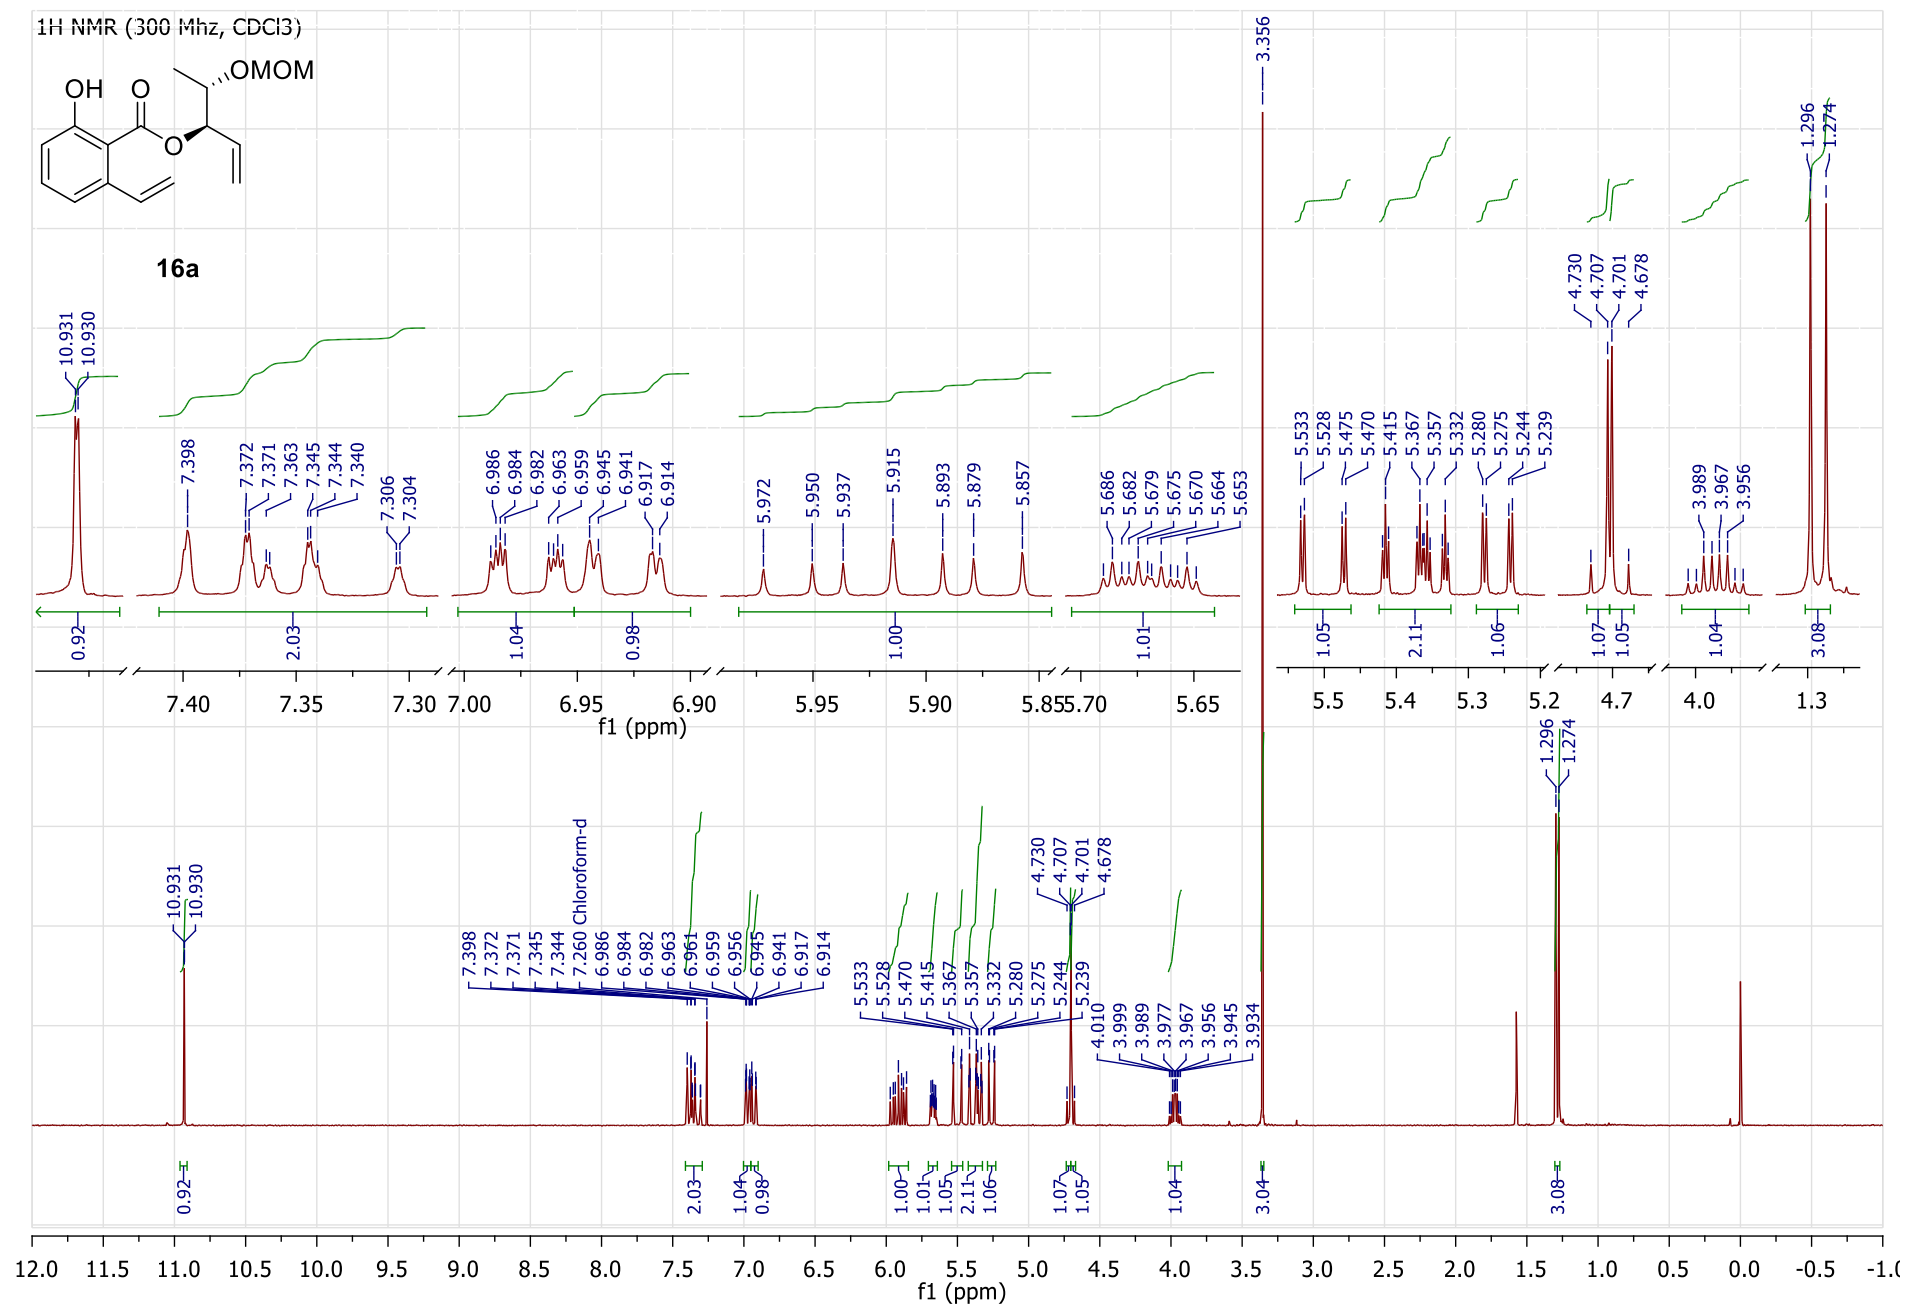

Figure S34. <sup>1</sup>H NMR spectrum of **16a**.

$^{13}\text{C}\{^1\text{H}\}$  NMR (75 Mhz,  $\text{CDCl}_3$ )

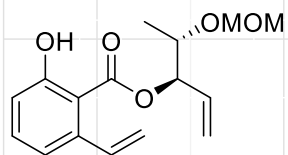

**16a**

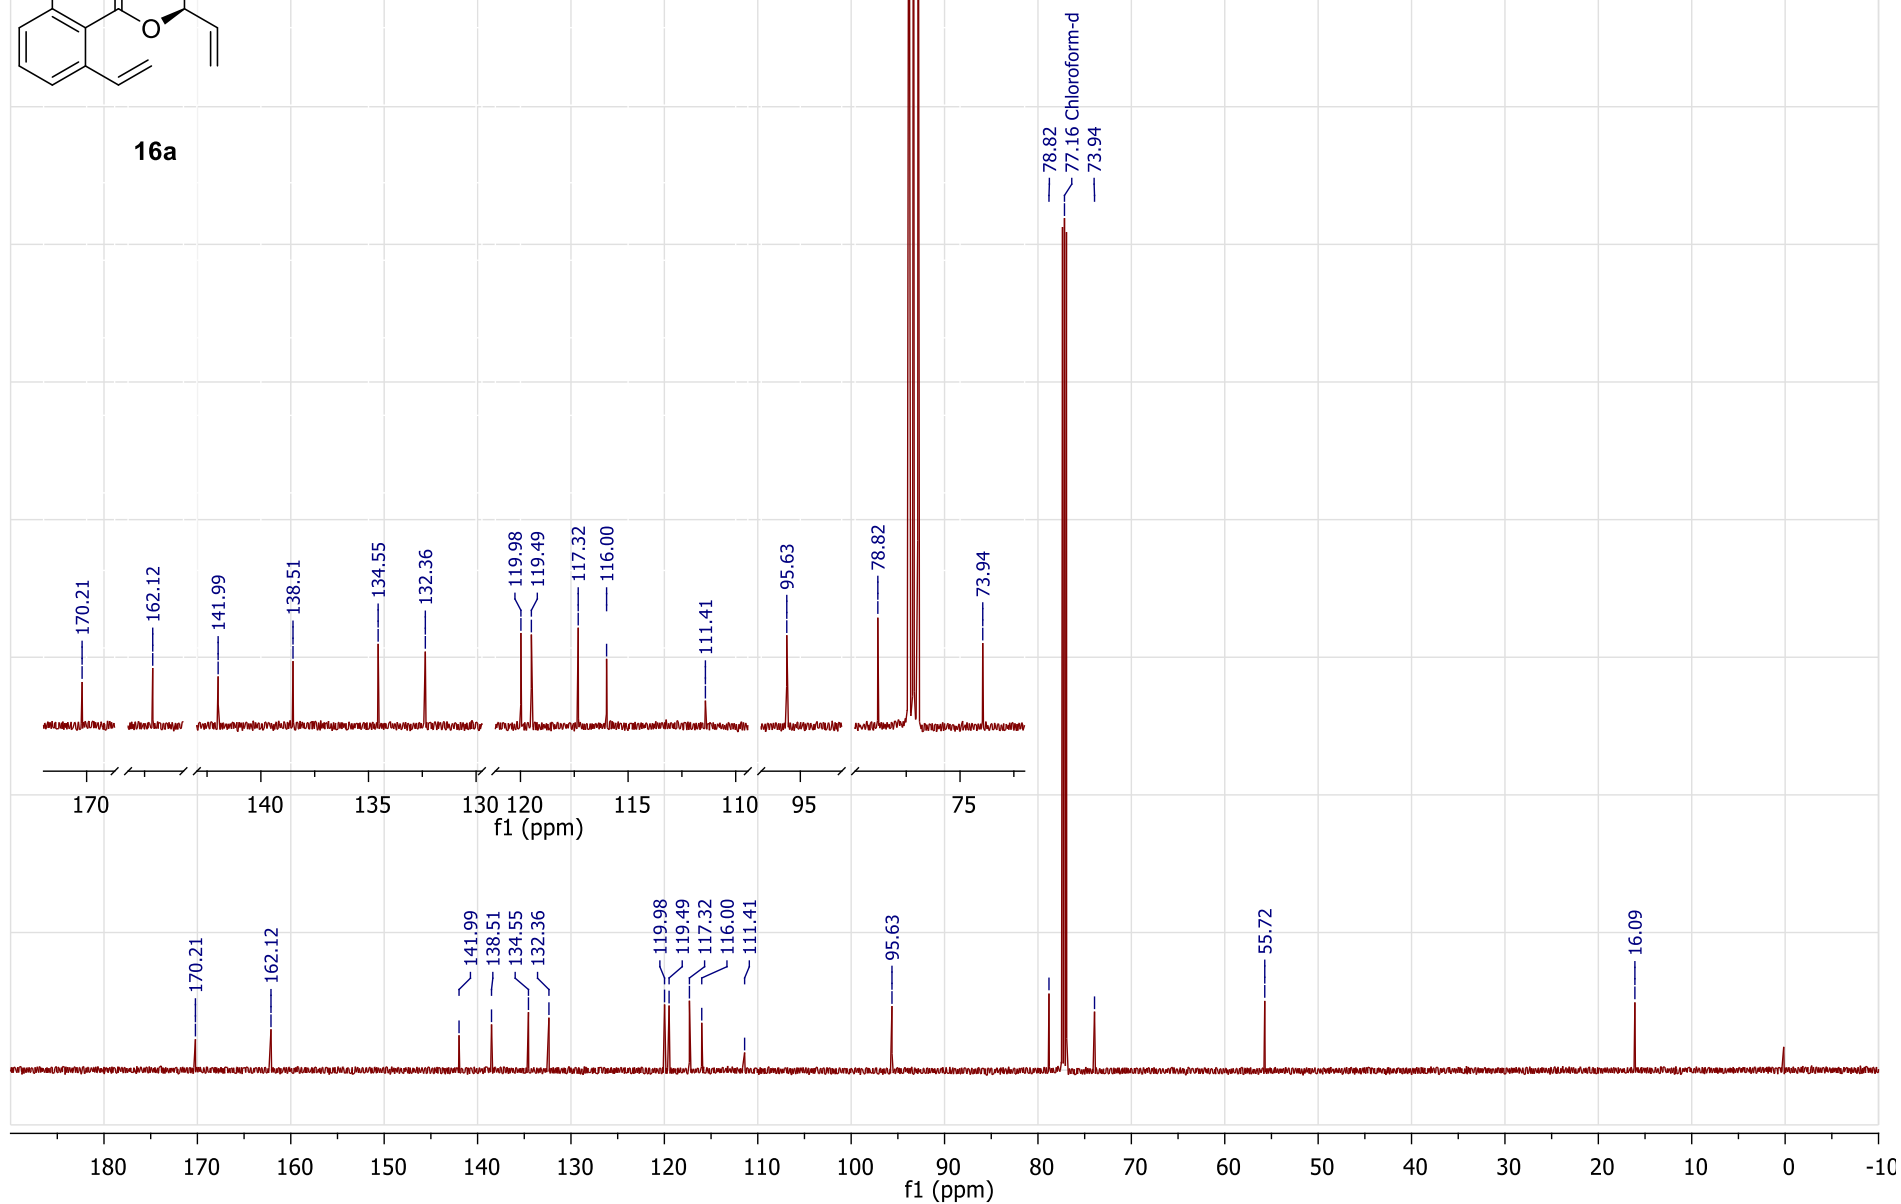

**Figure S35.**  $^{13}\text{C}$  NMR spectrum of **16a**.

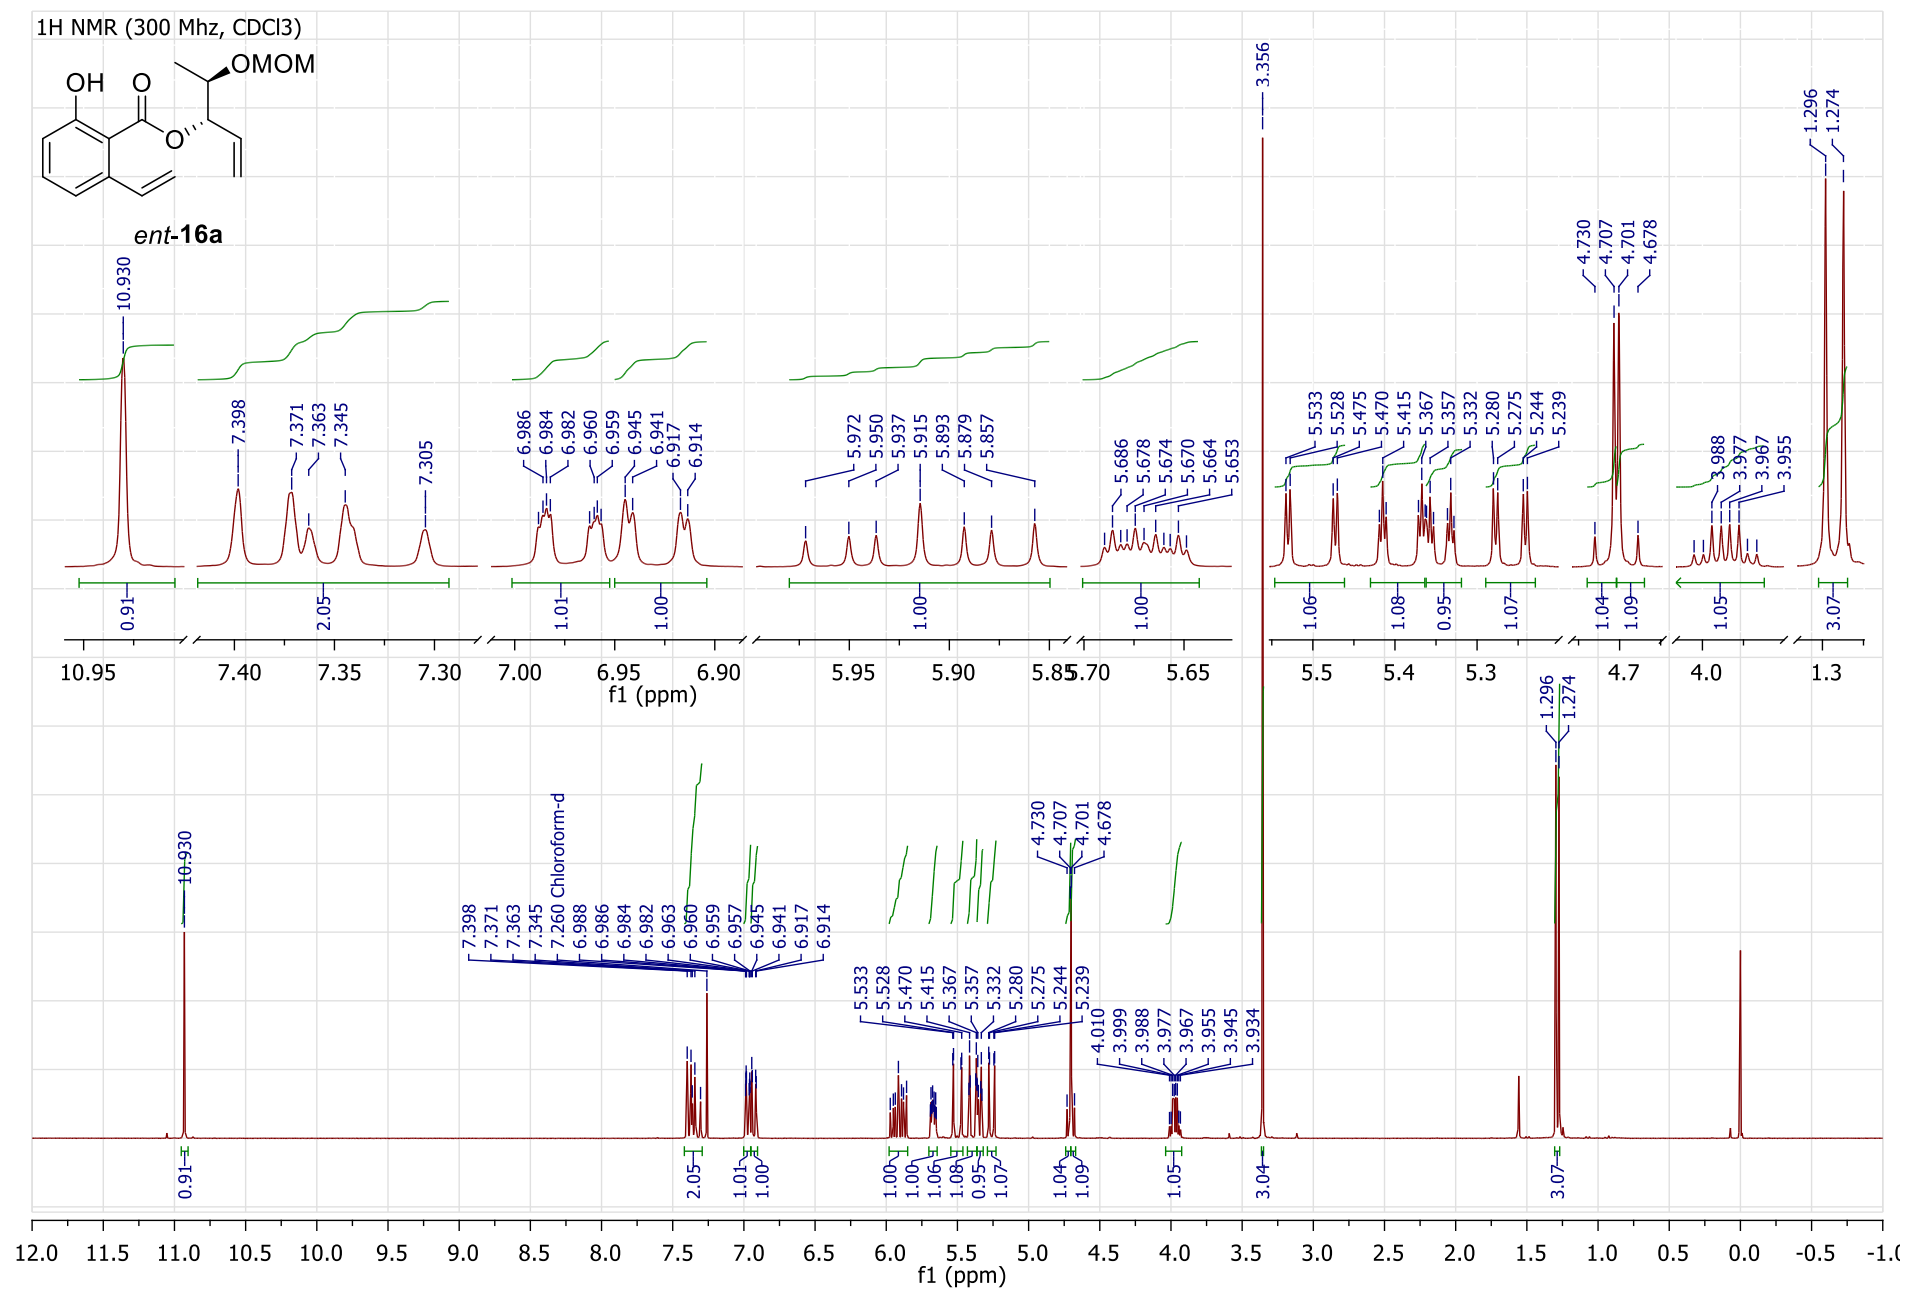

**Figure S36.** <sup>1</sup>H NMR spectrum of **ent-16a**.

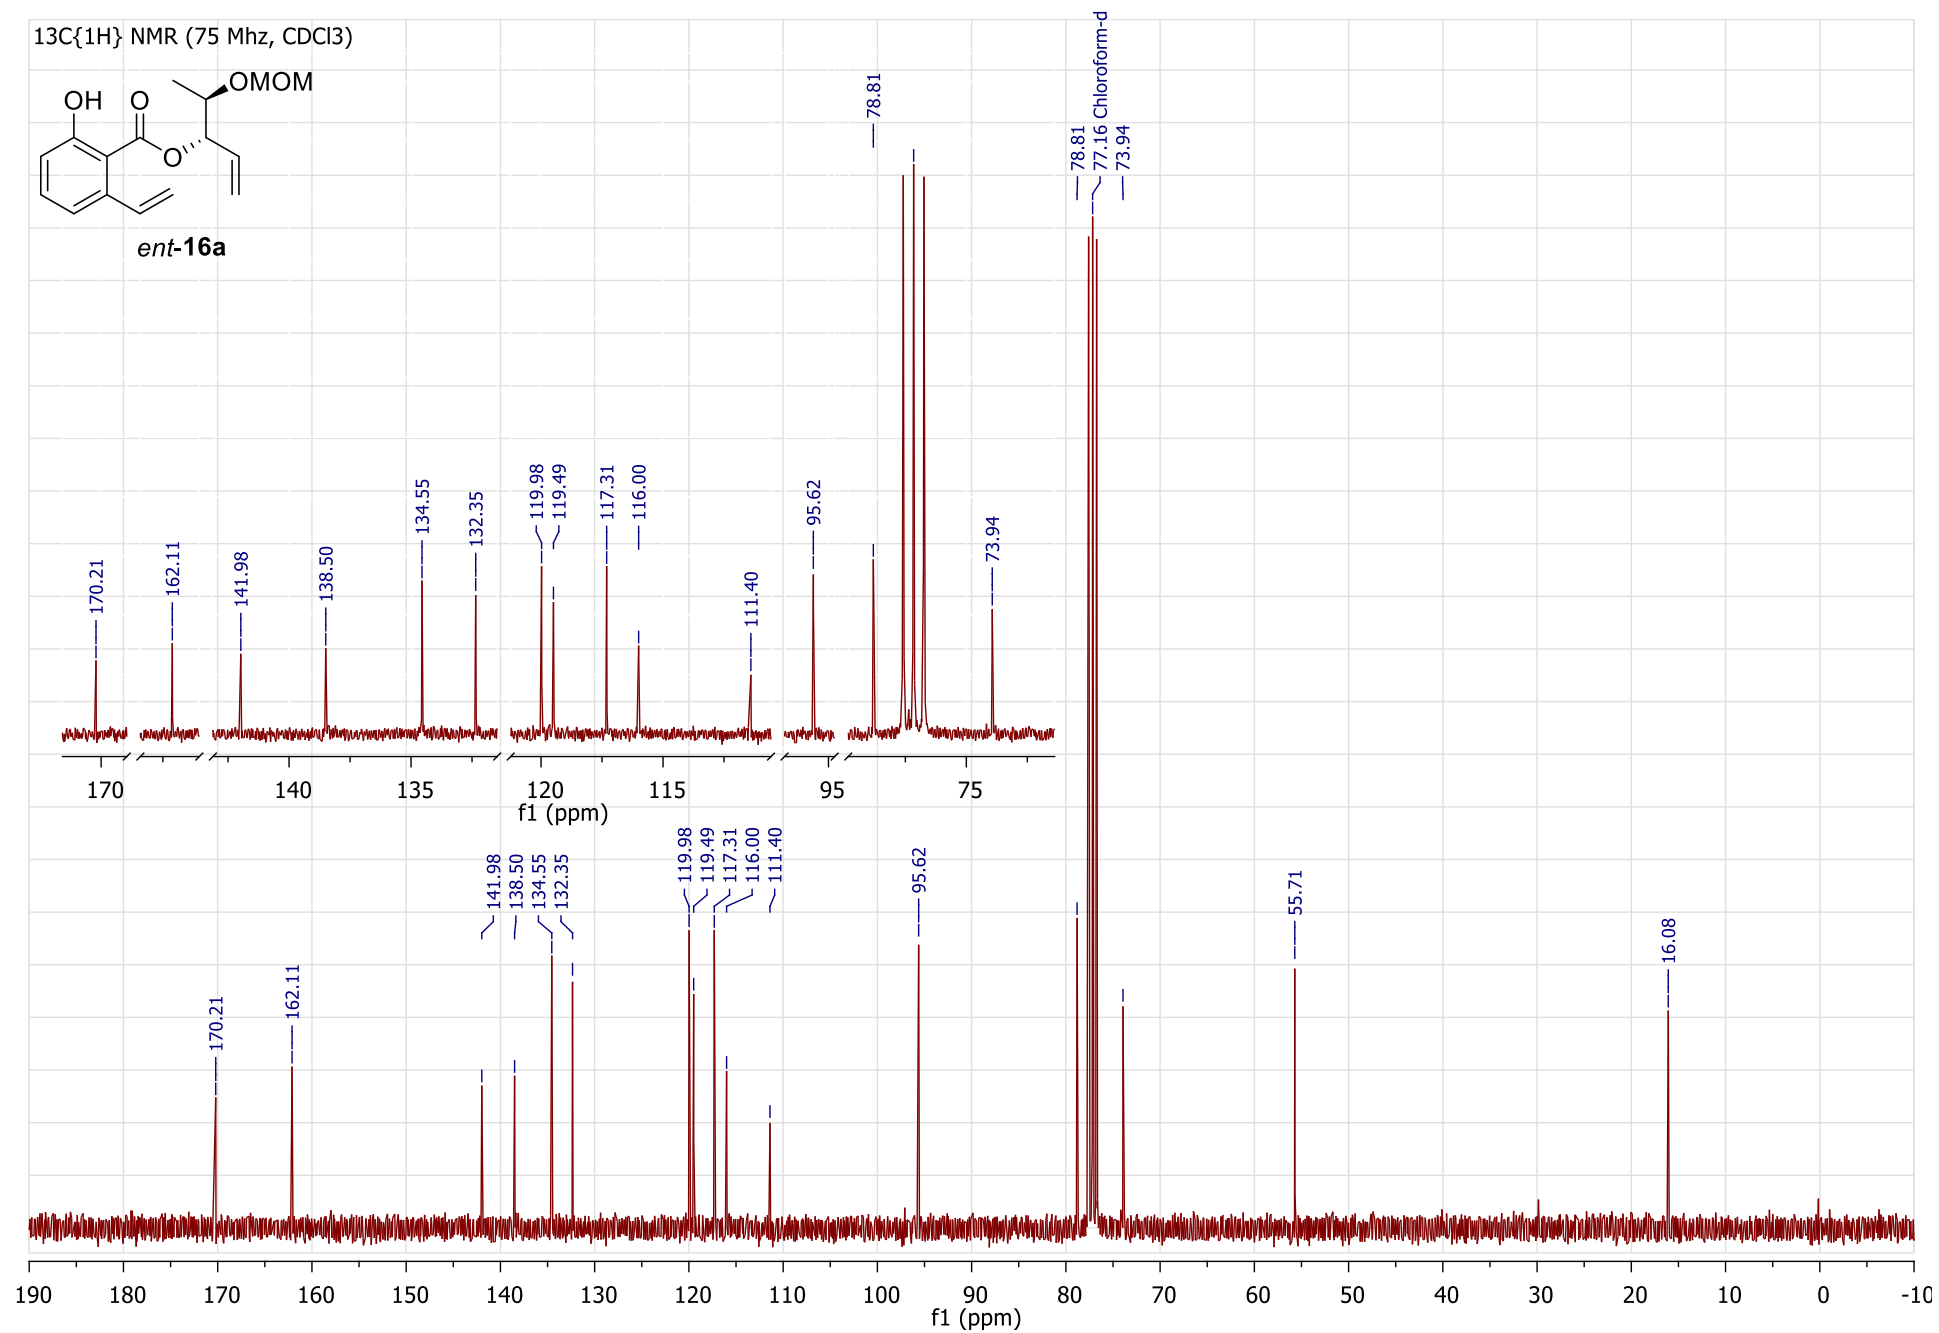

**Figure S37.**  $^{13}\text{C}$  NMR spectrum of **ent-16a**.

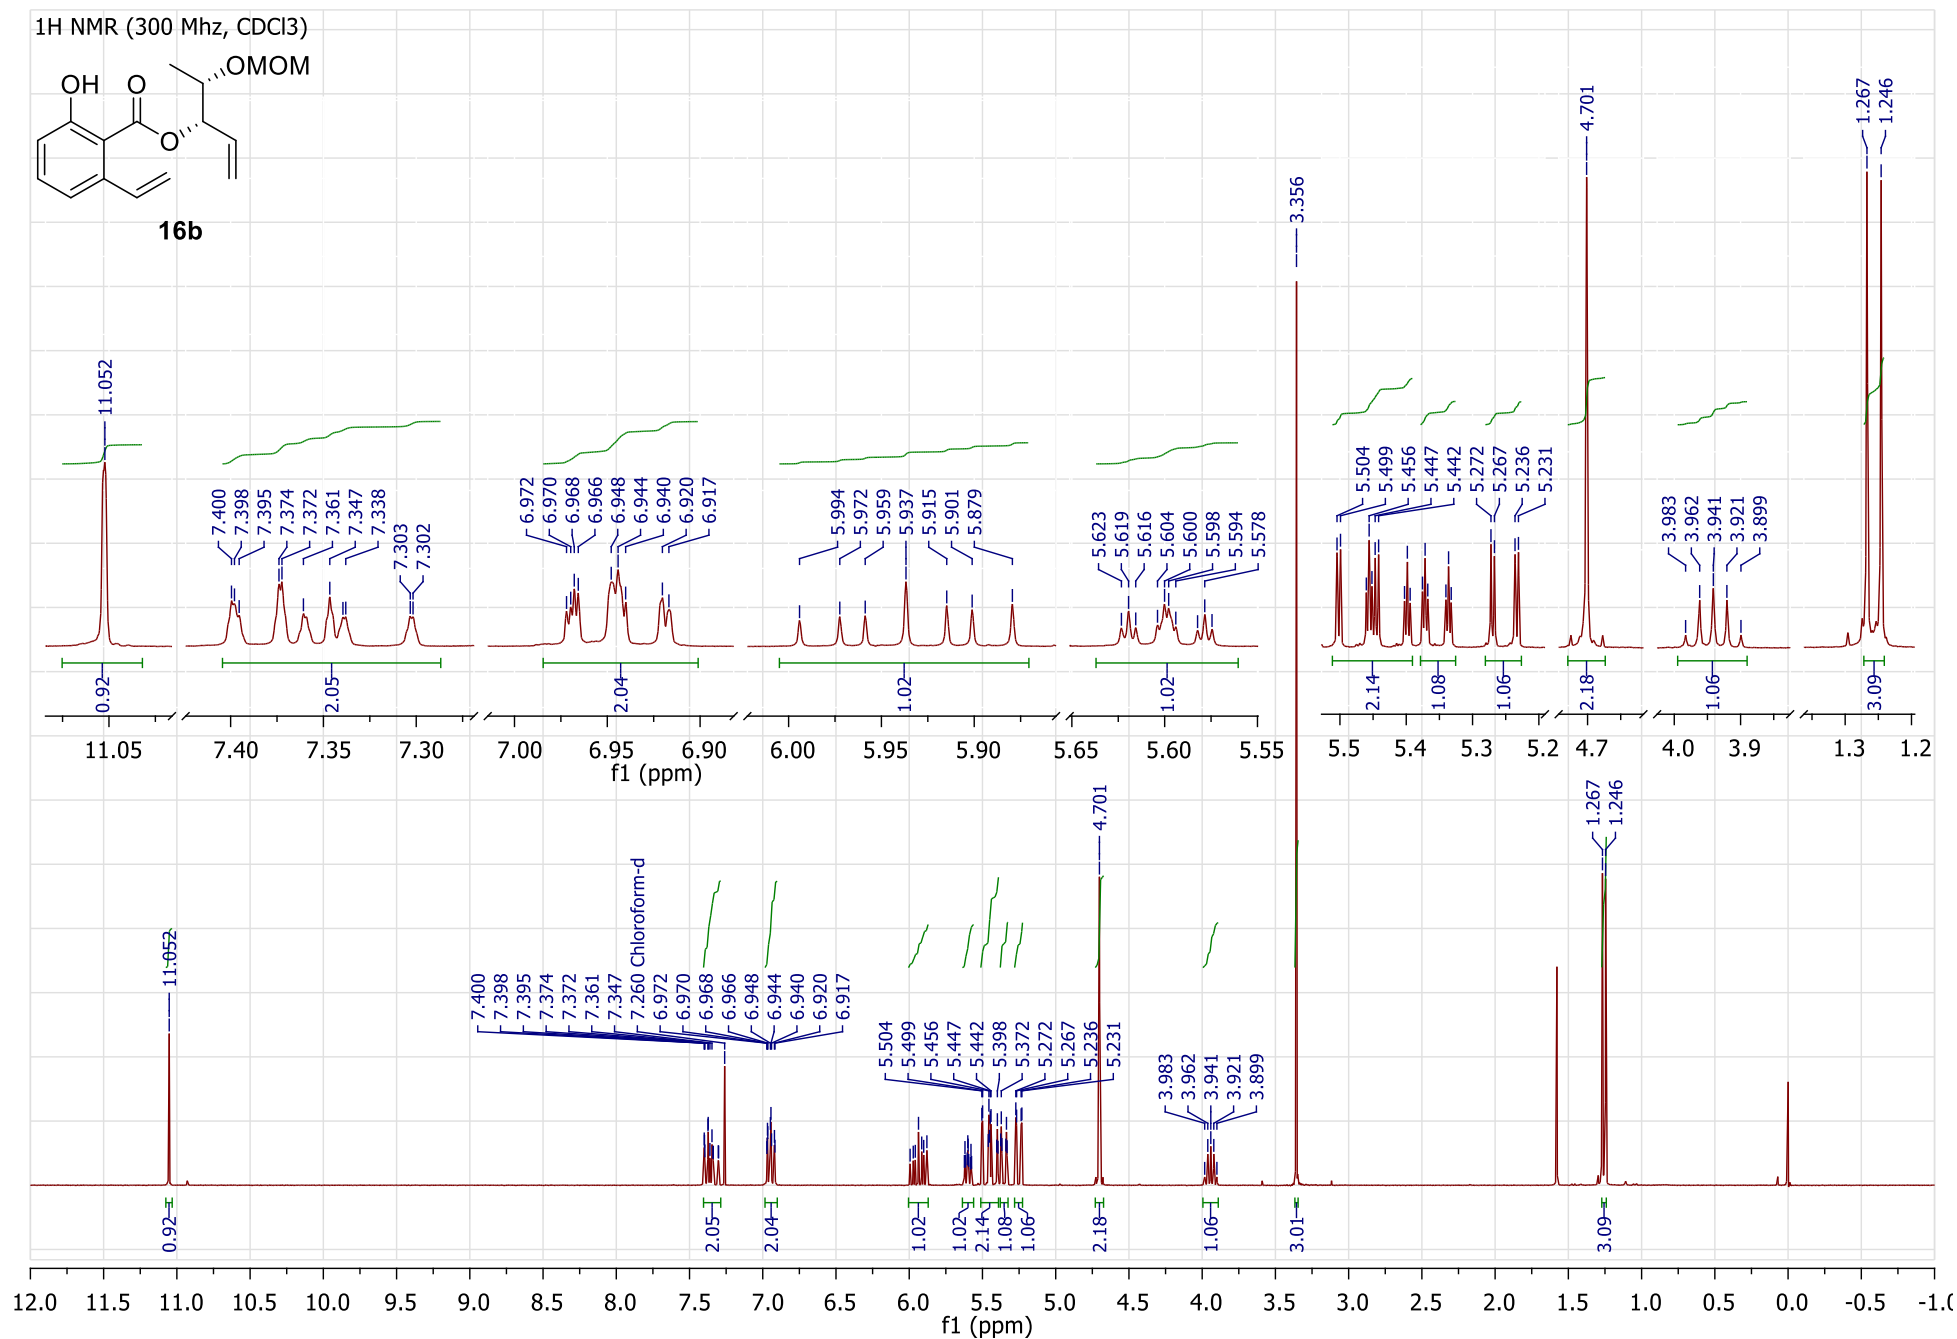

**Figure S38.** <sup>1</sup>H NMR spectrum of **16b**.

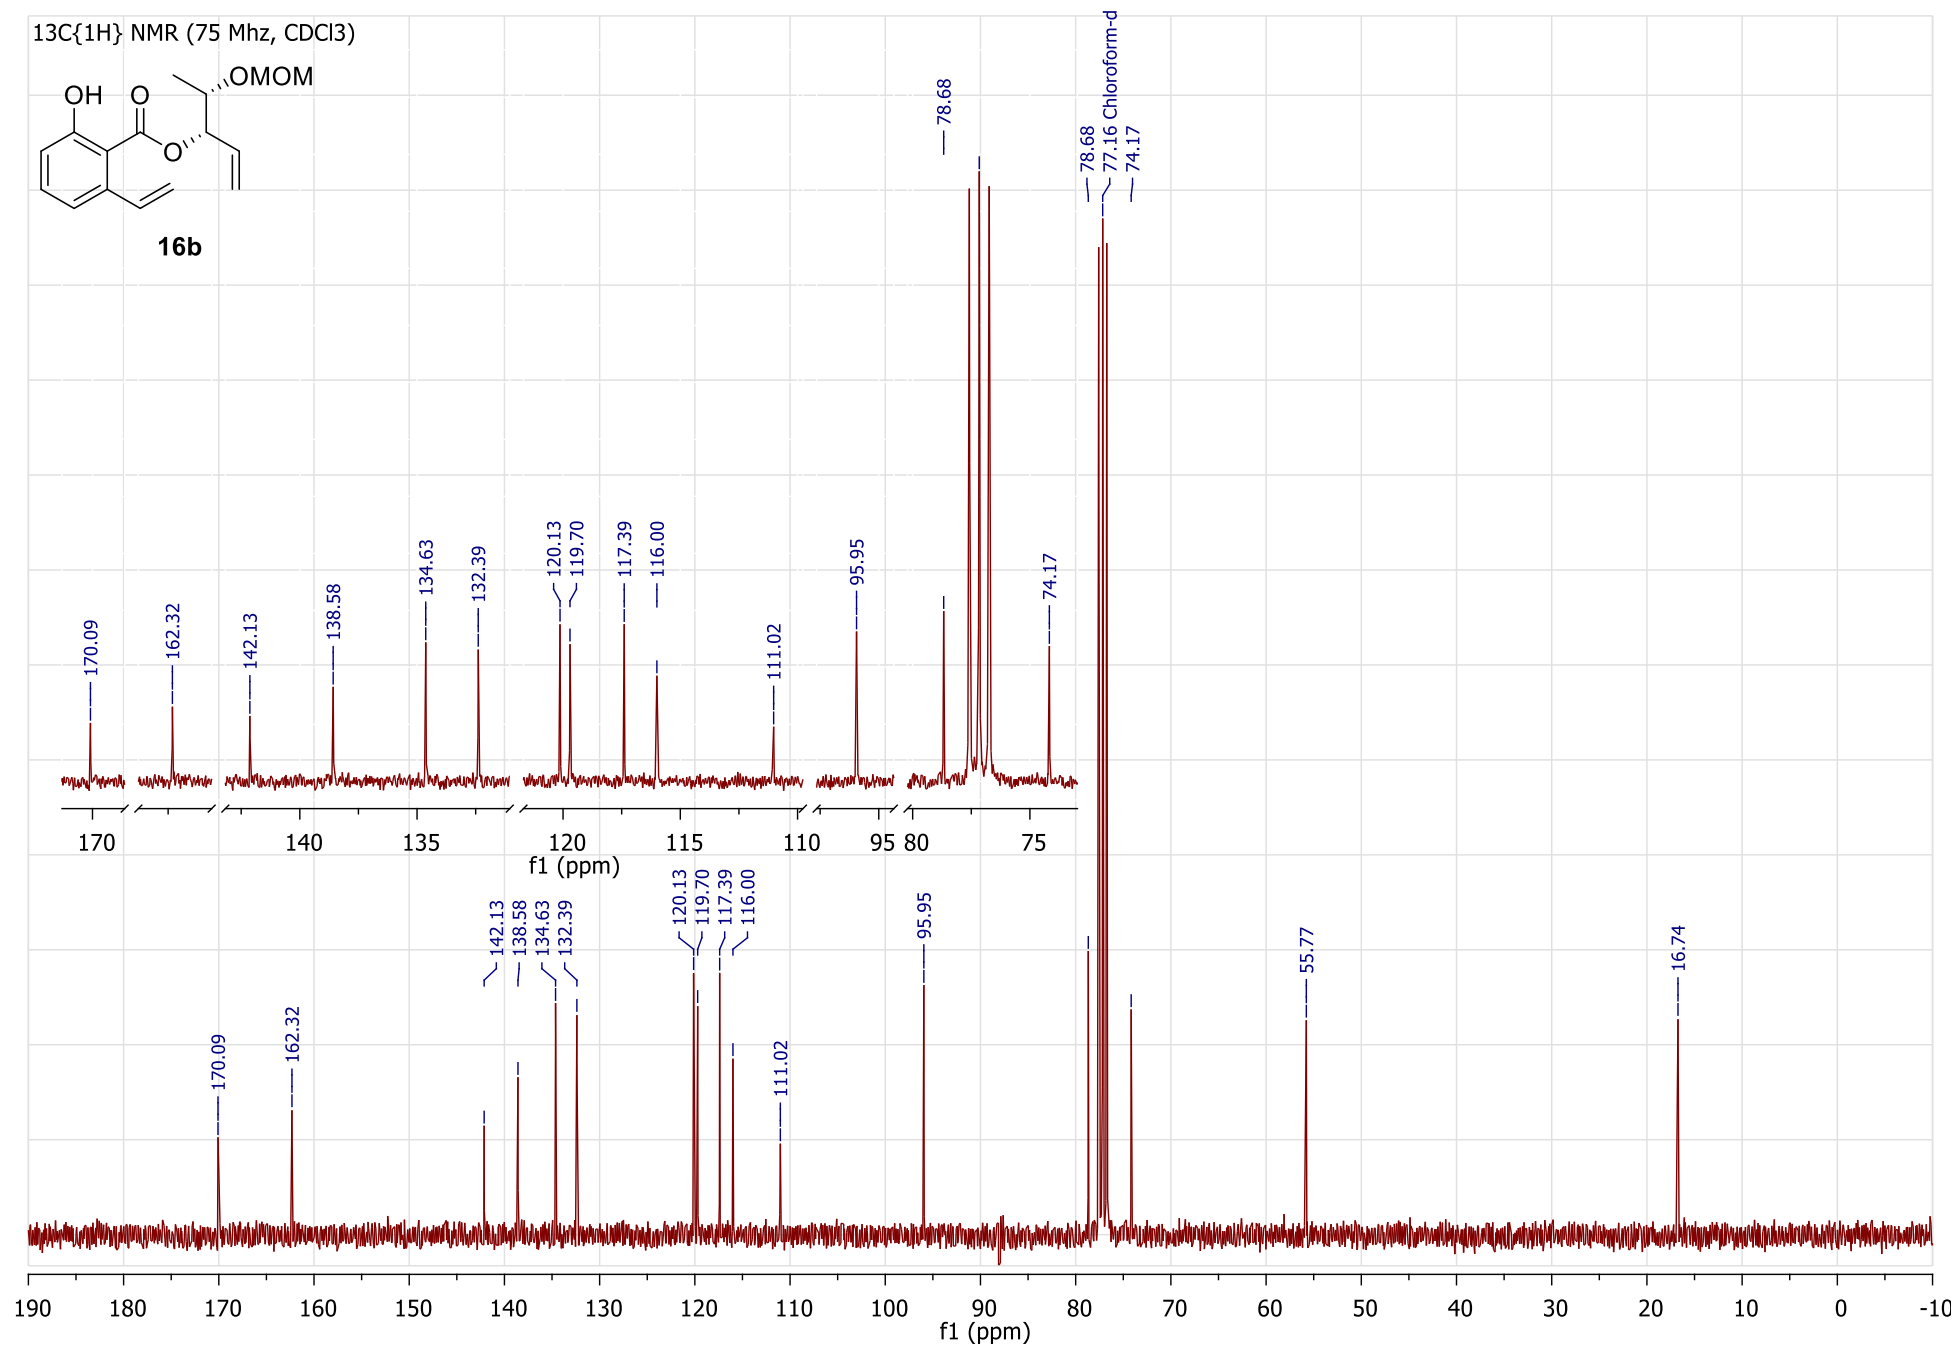

**Figure S39.** <sup>1</sup>H NMR spectrum of **16b**.



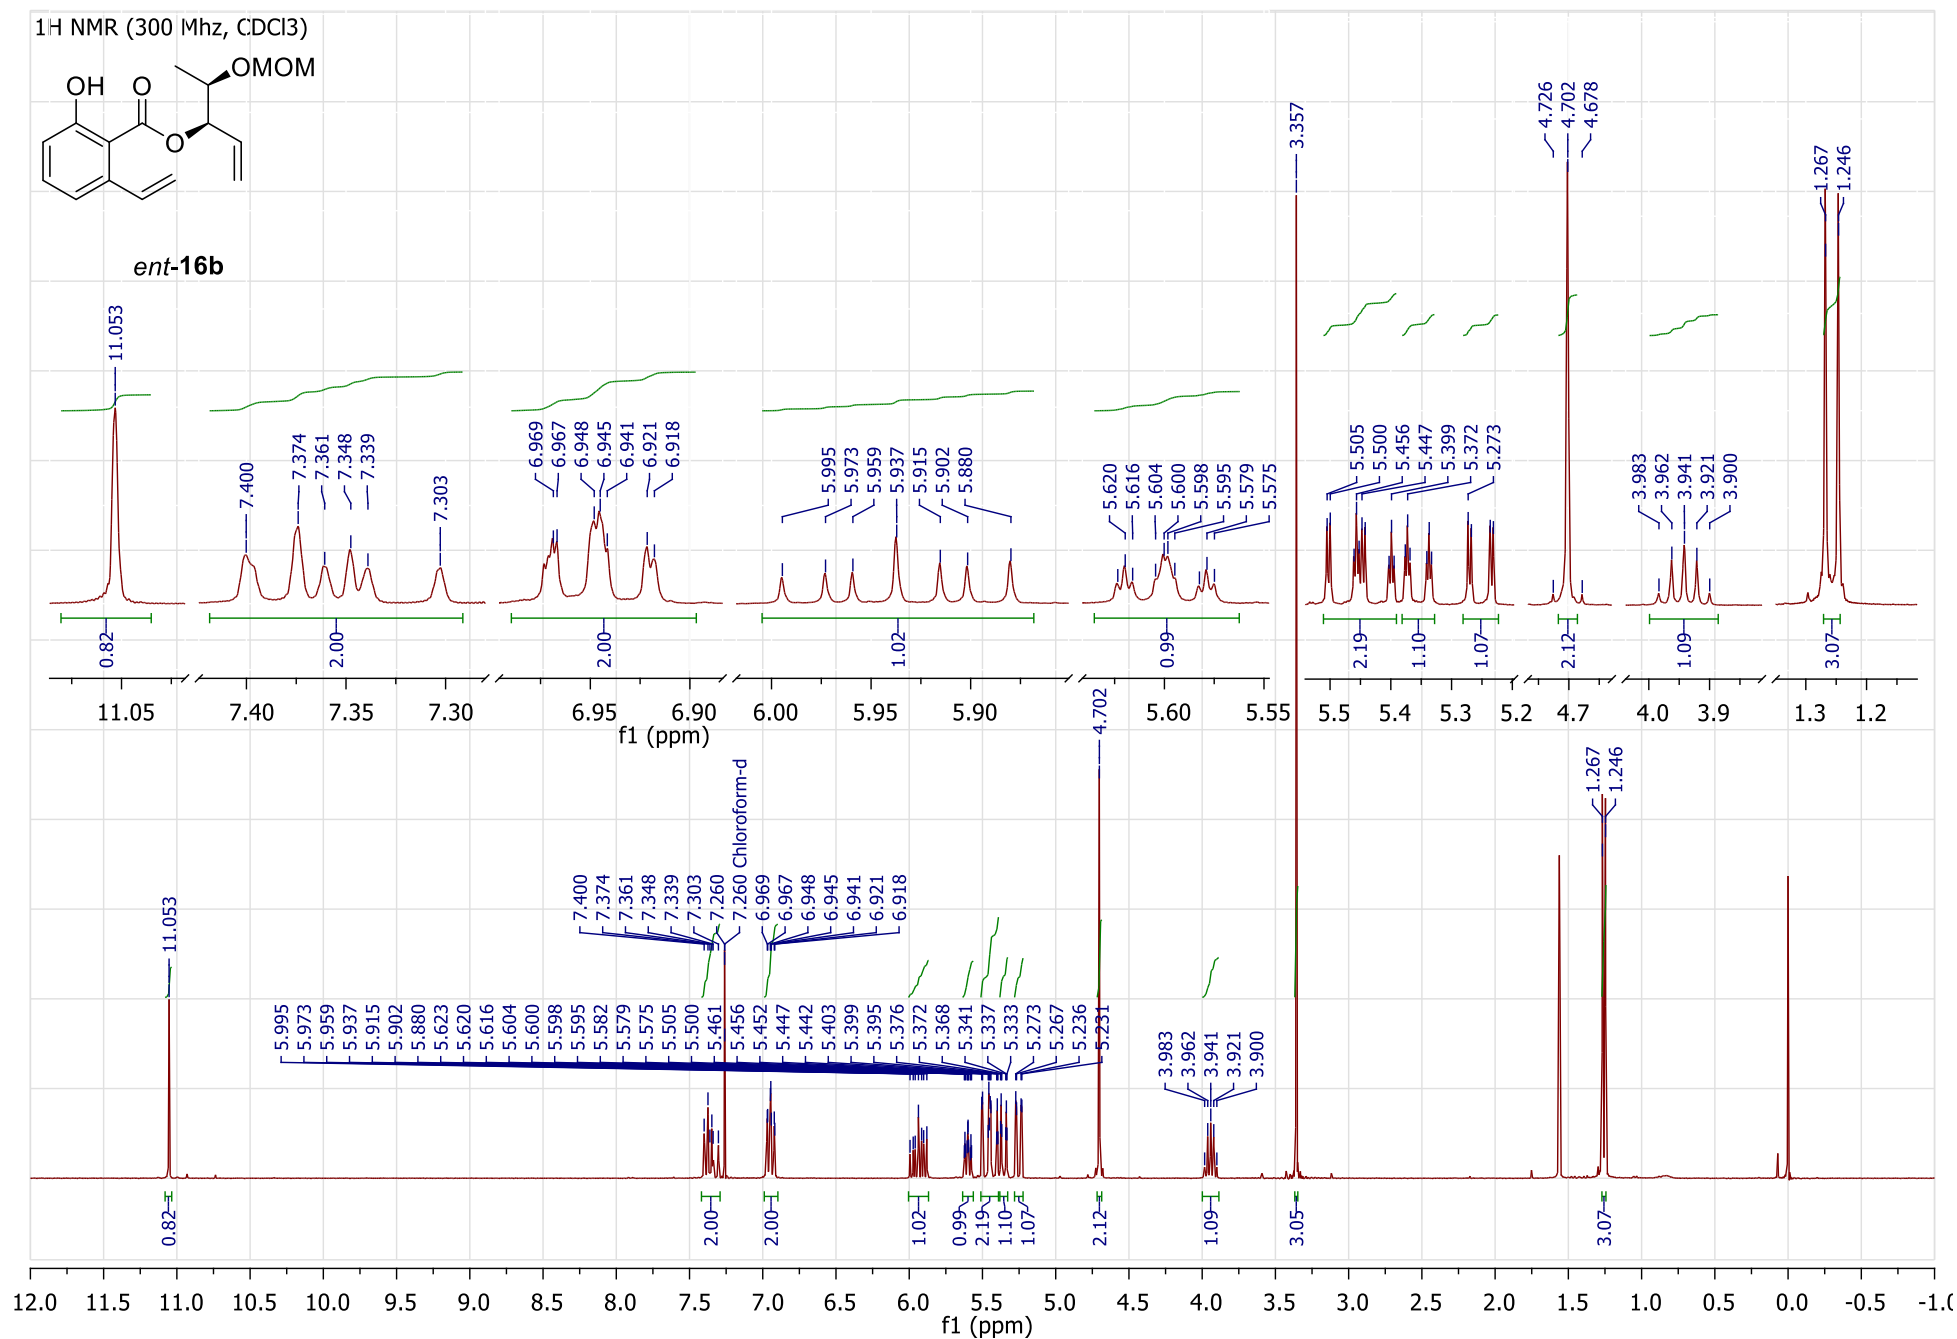

**Figure S40.** <sup>1</sup>H NMR spectrum of **ent-16b**.

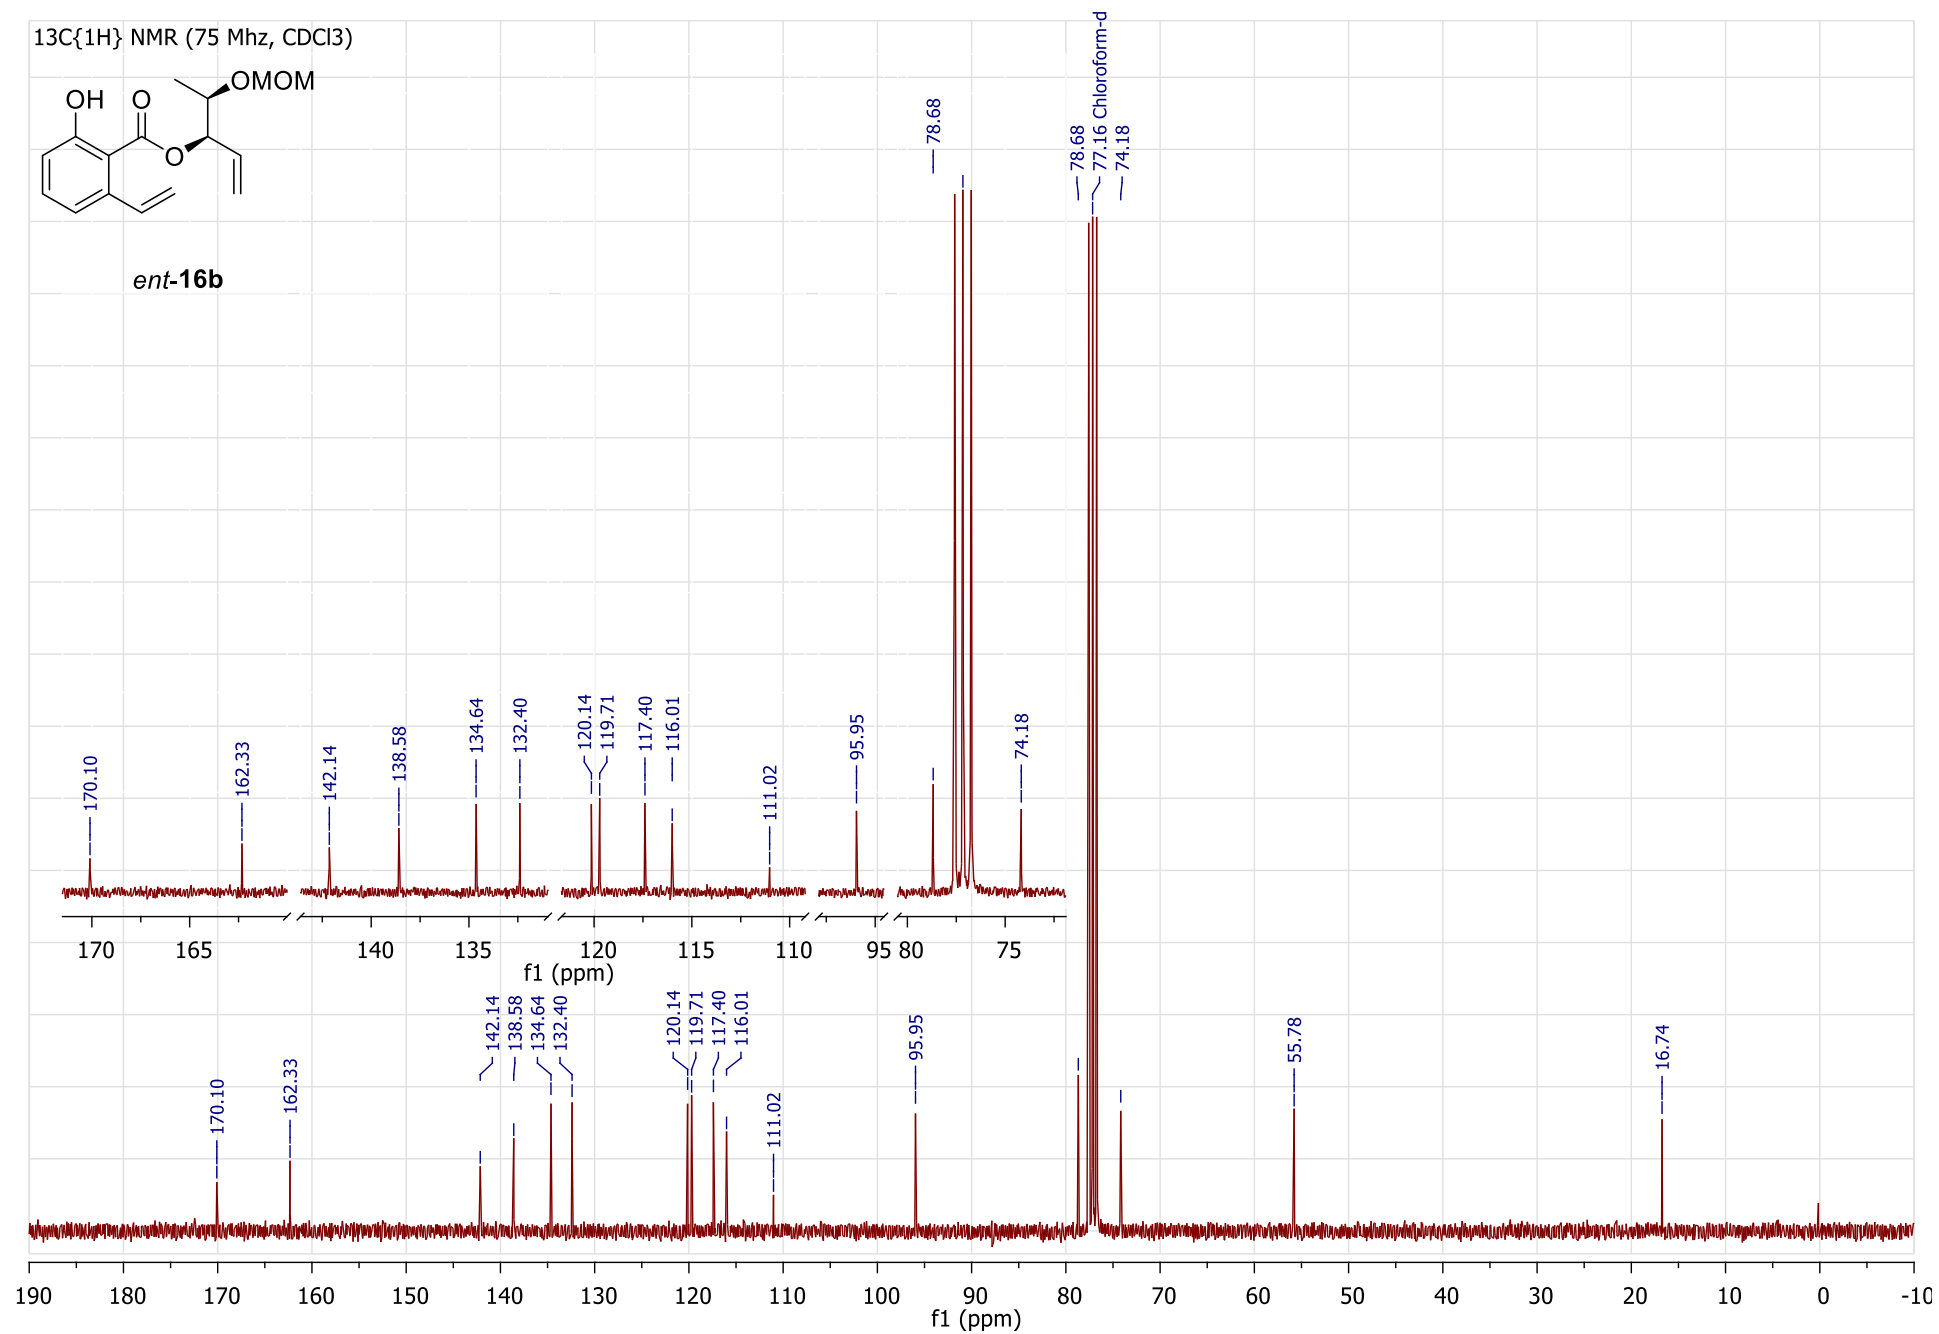

Figure S41. <sup>1</sup>H NMR spectrum of *ent*-**16b**.

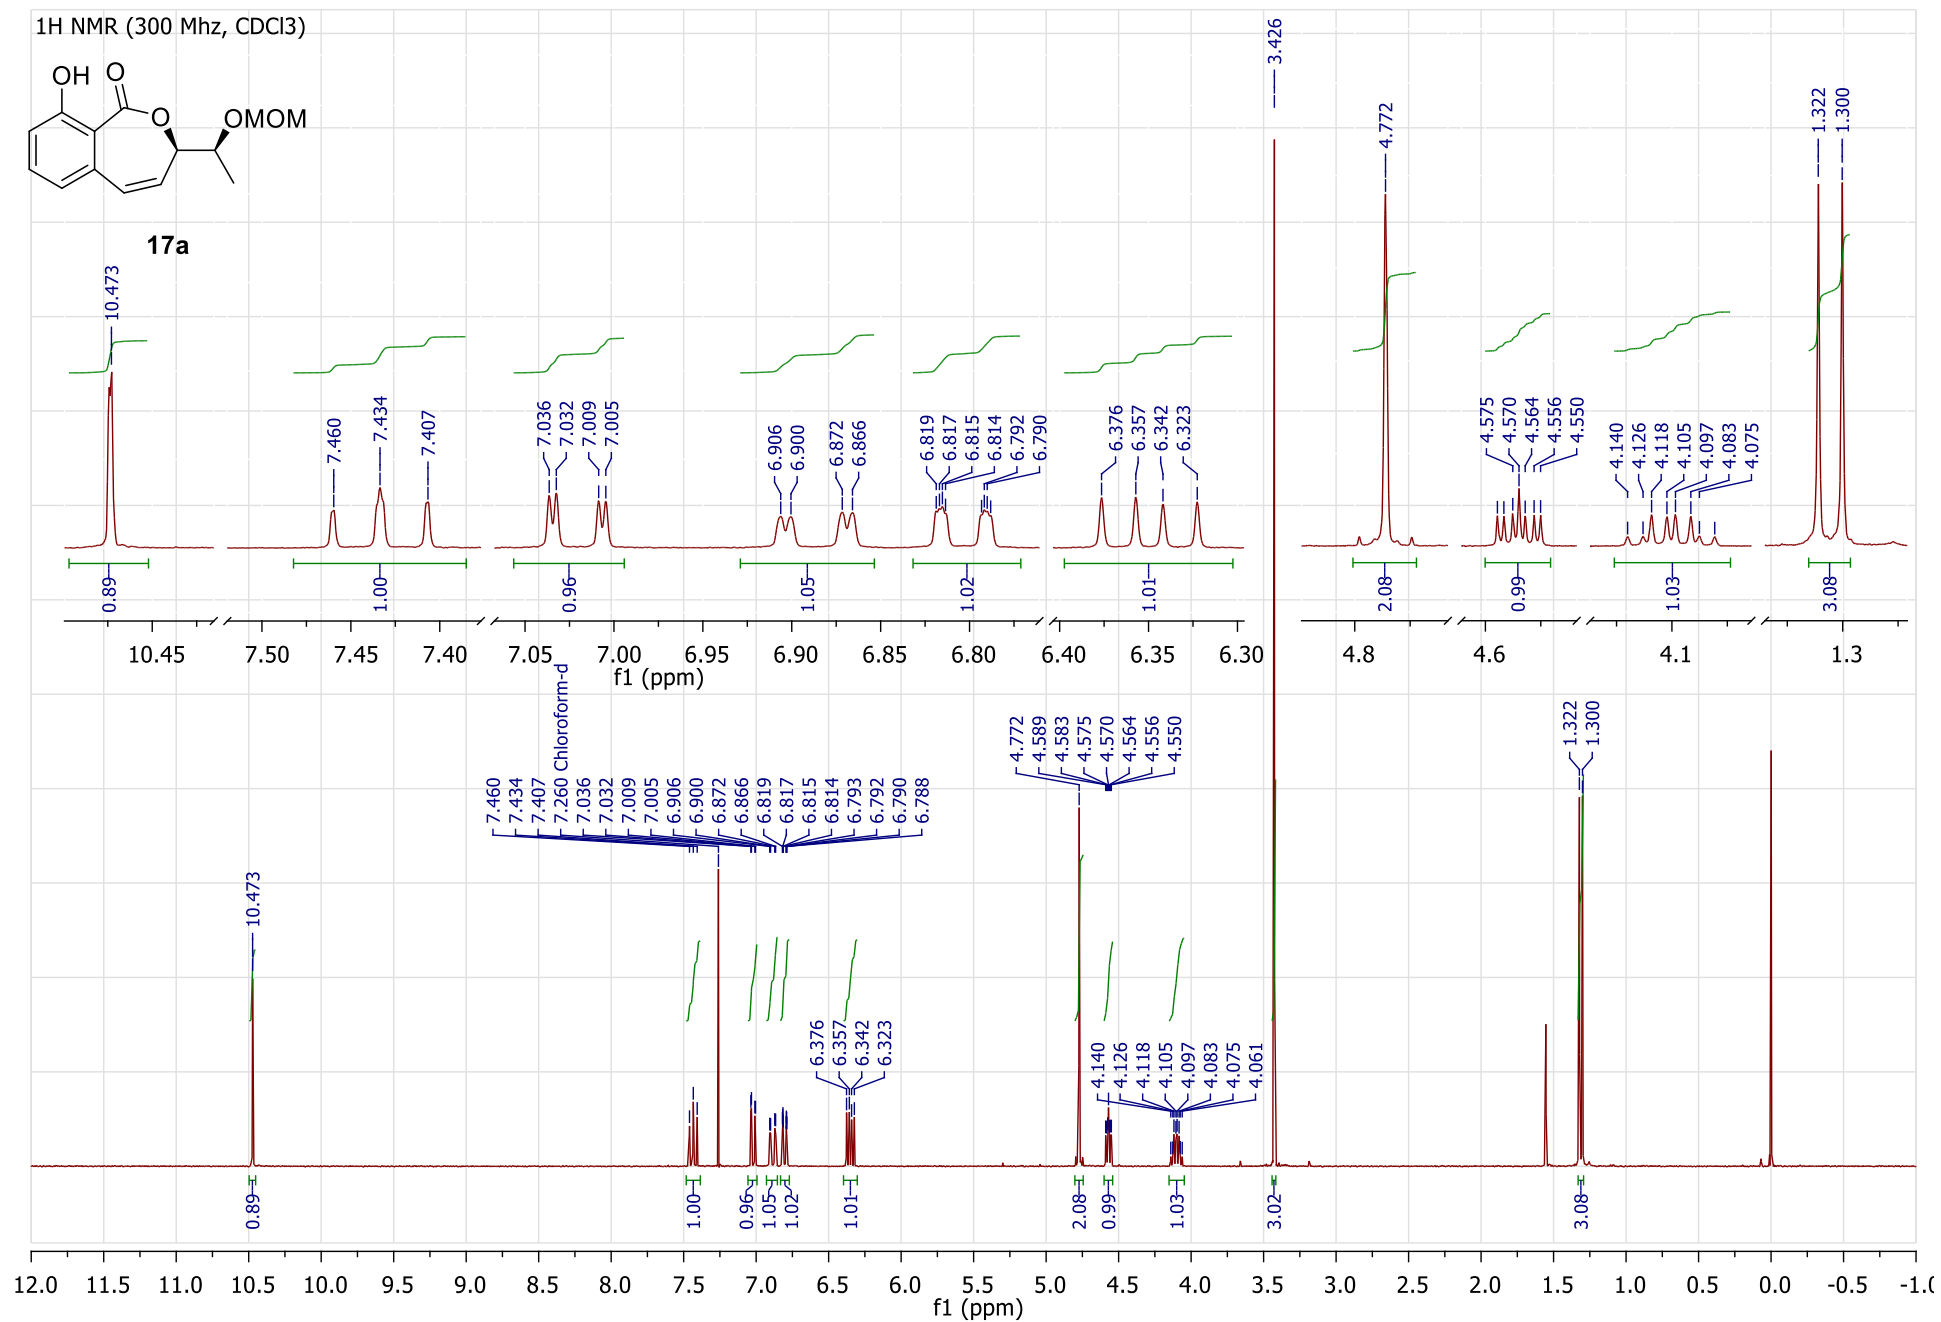

**Figure S42.** <sup>1</sup>H NMR spectrum of **17a**.

$^{13}\text{C}\{^1\text{H}\}$  NMR (75 MHz,  $\text{CDCl}_3$ )

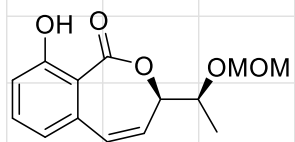

**17a**

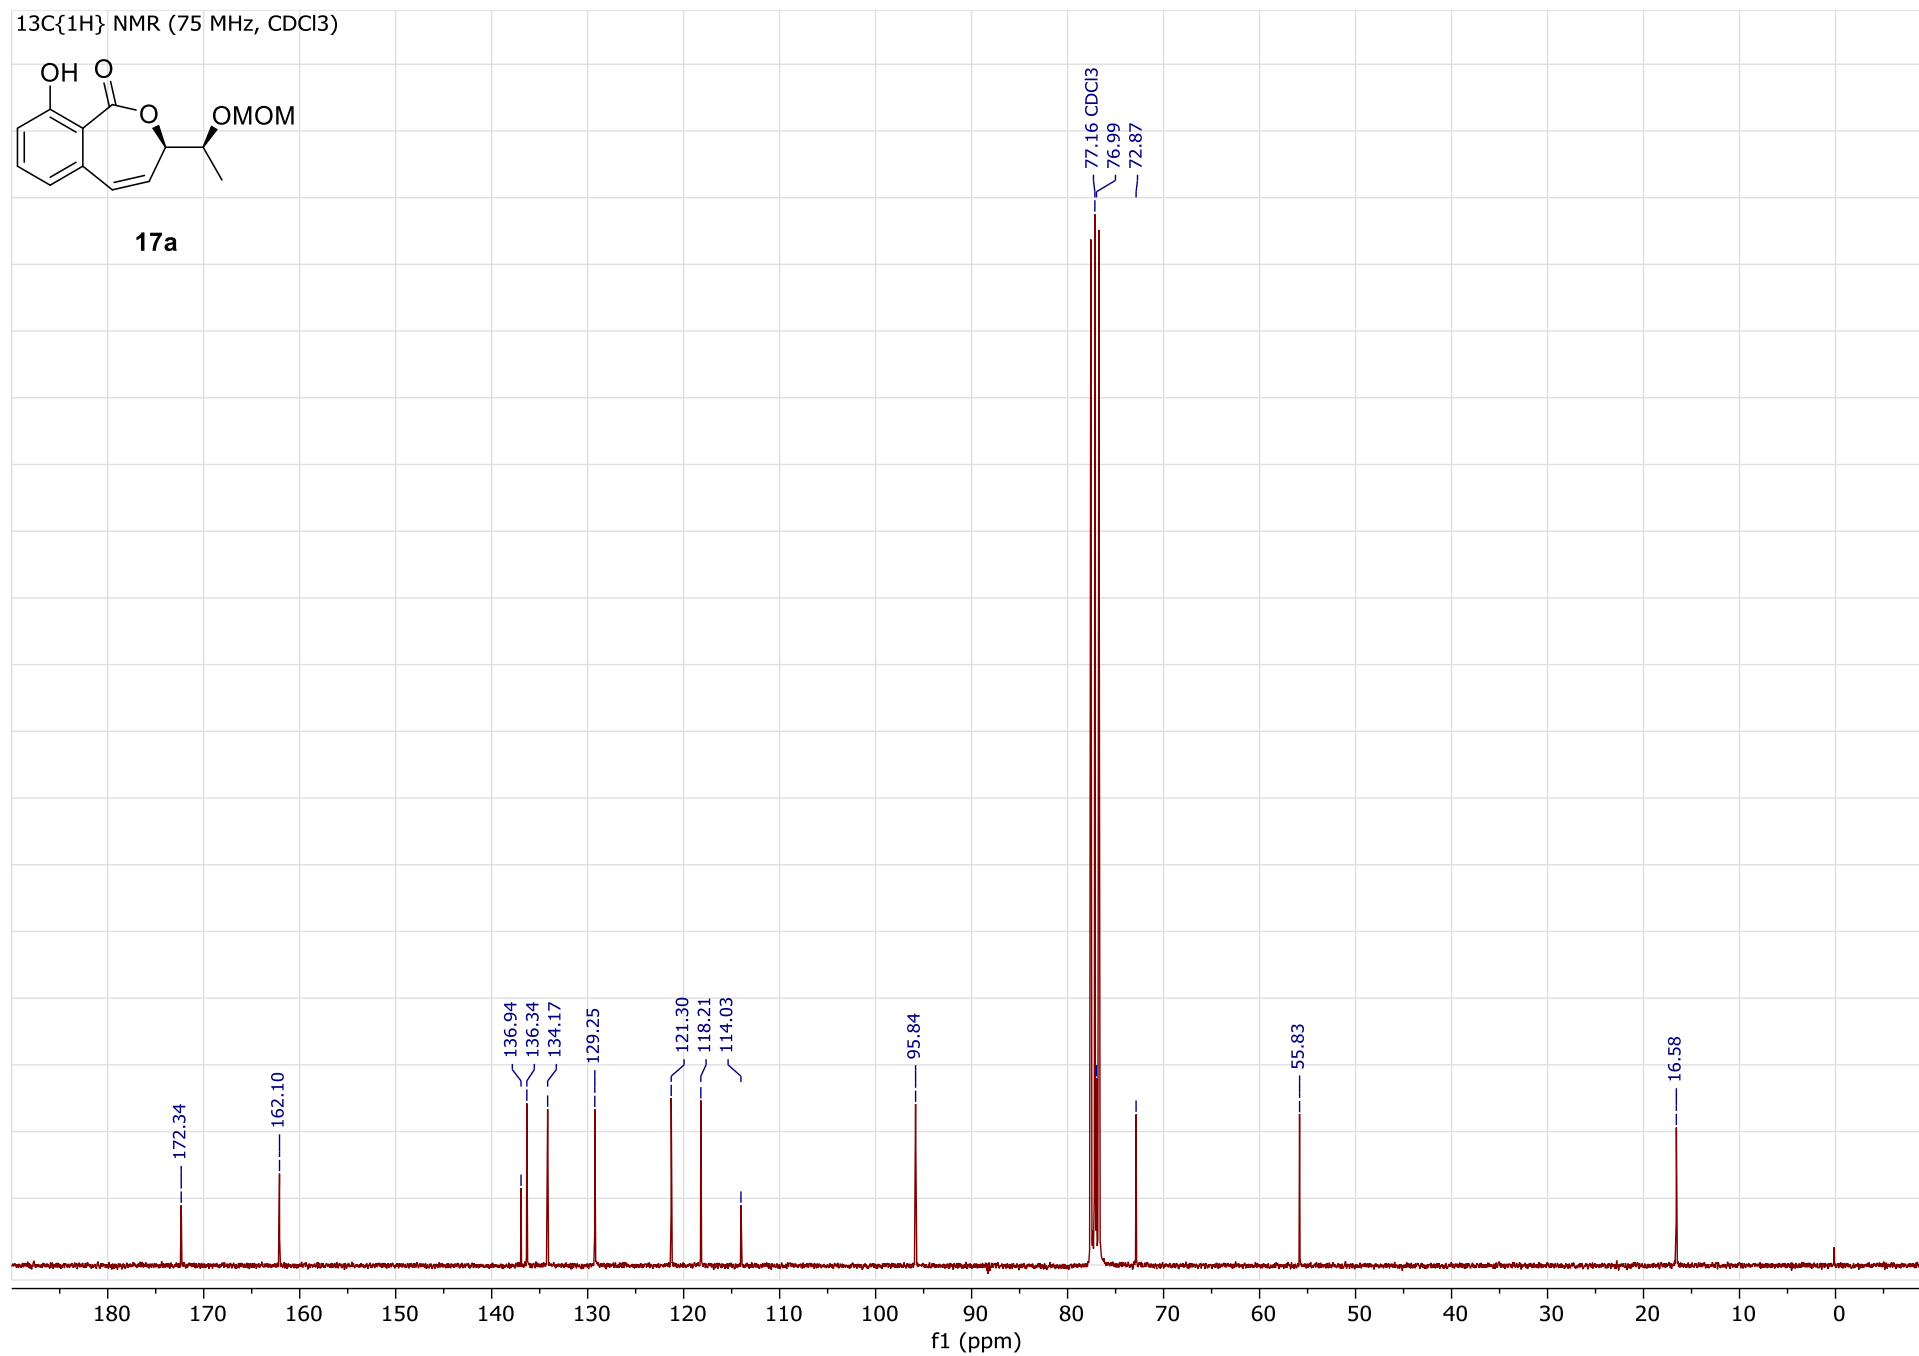

**Figure S43.**  $^{13}\text{C}$  NMR spectrum of **17a**.

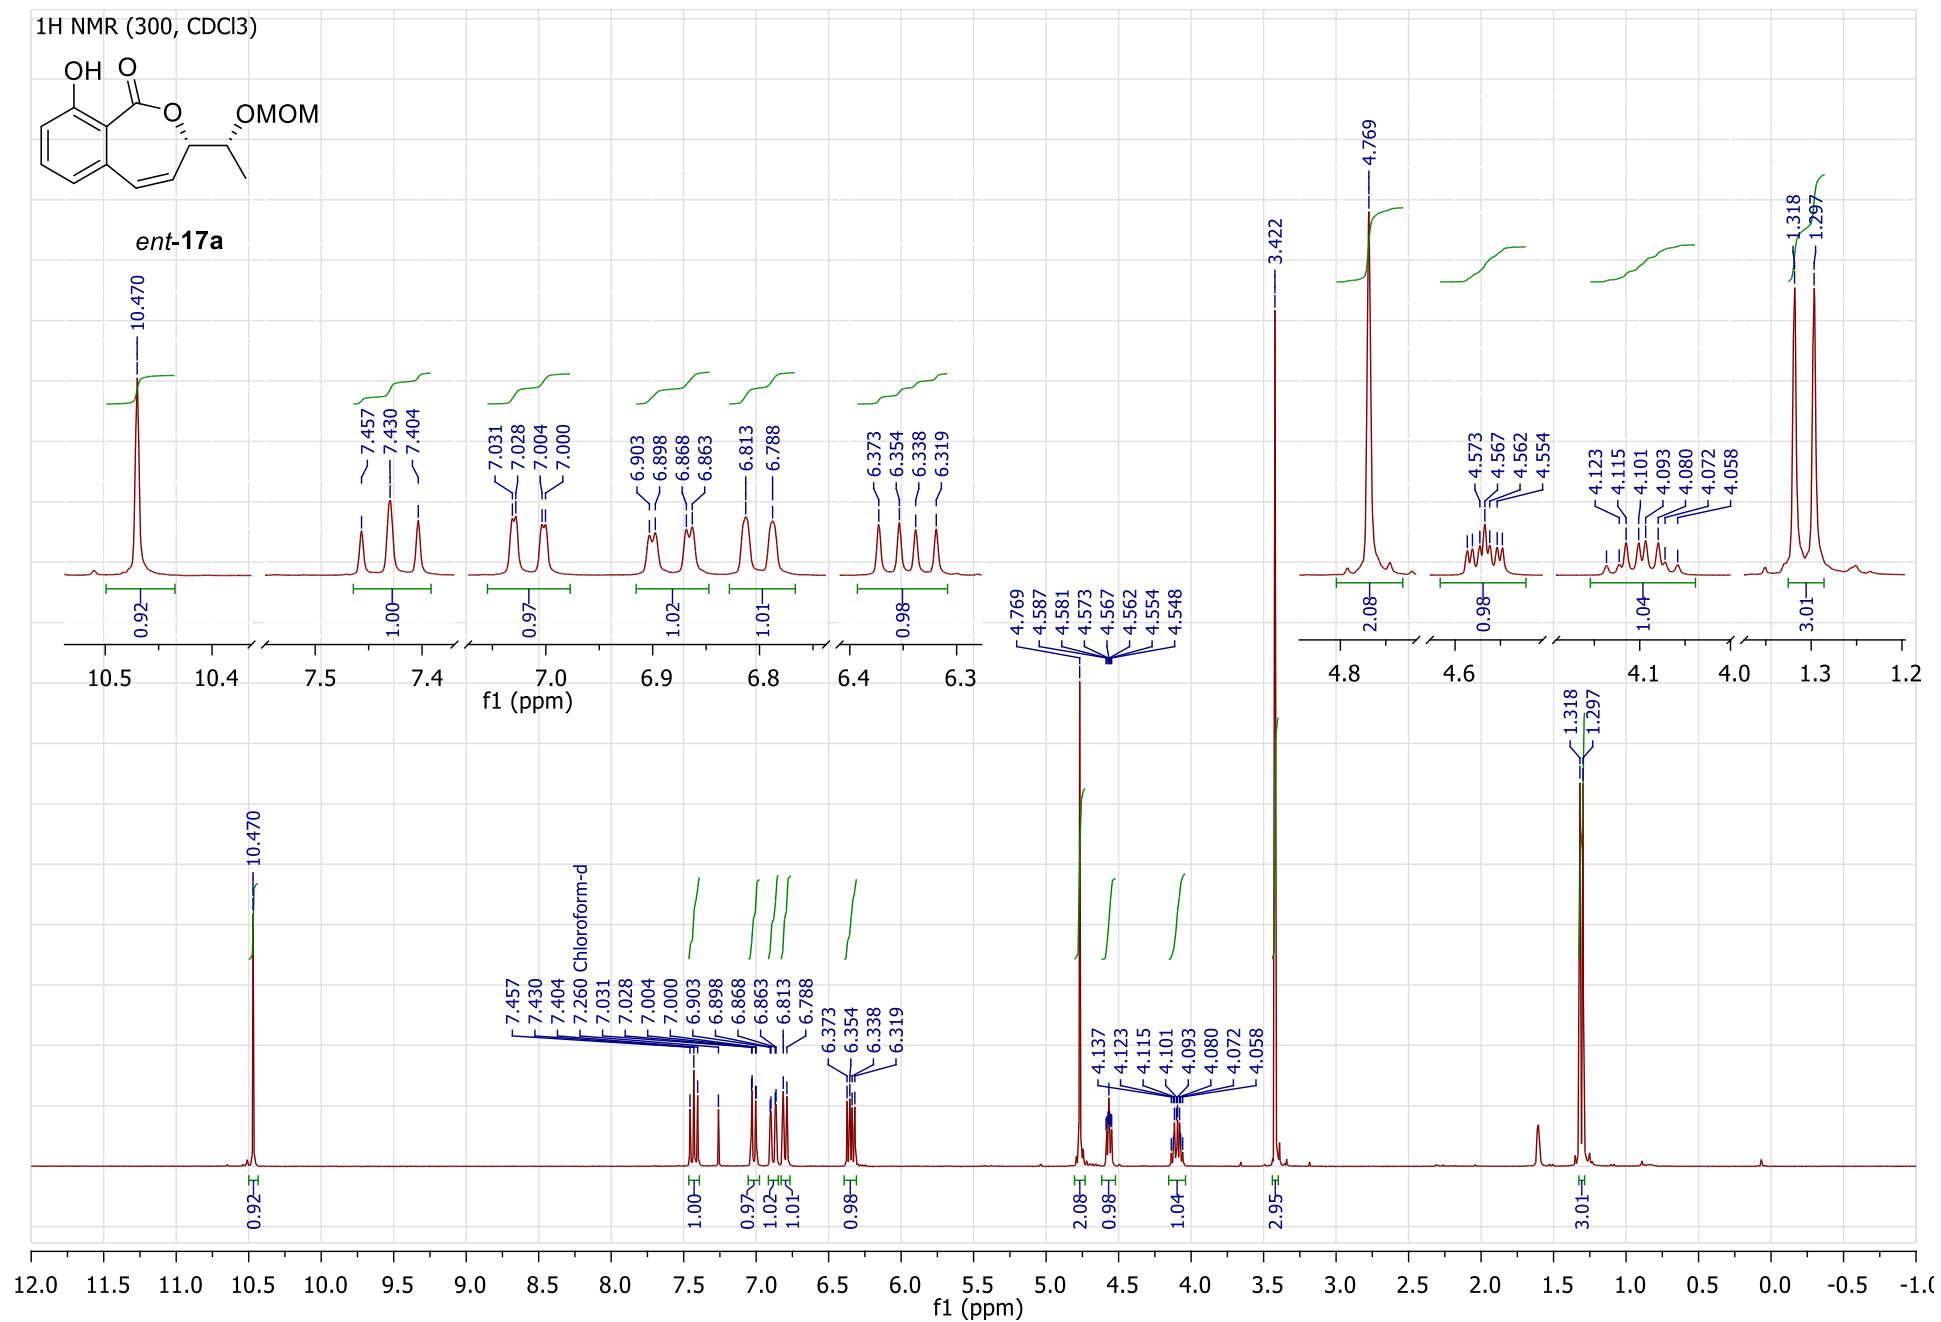

Figure S44. <sup>1</sup>H NMR spectrum of *ent*-17a.

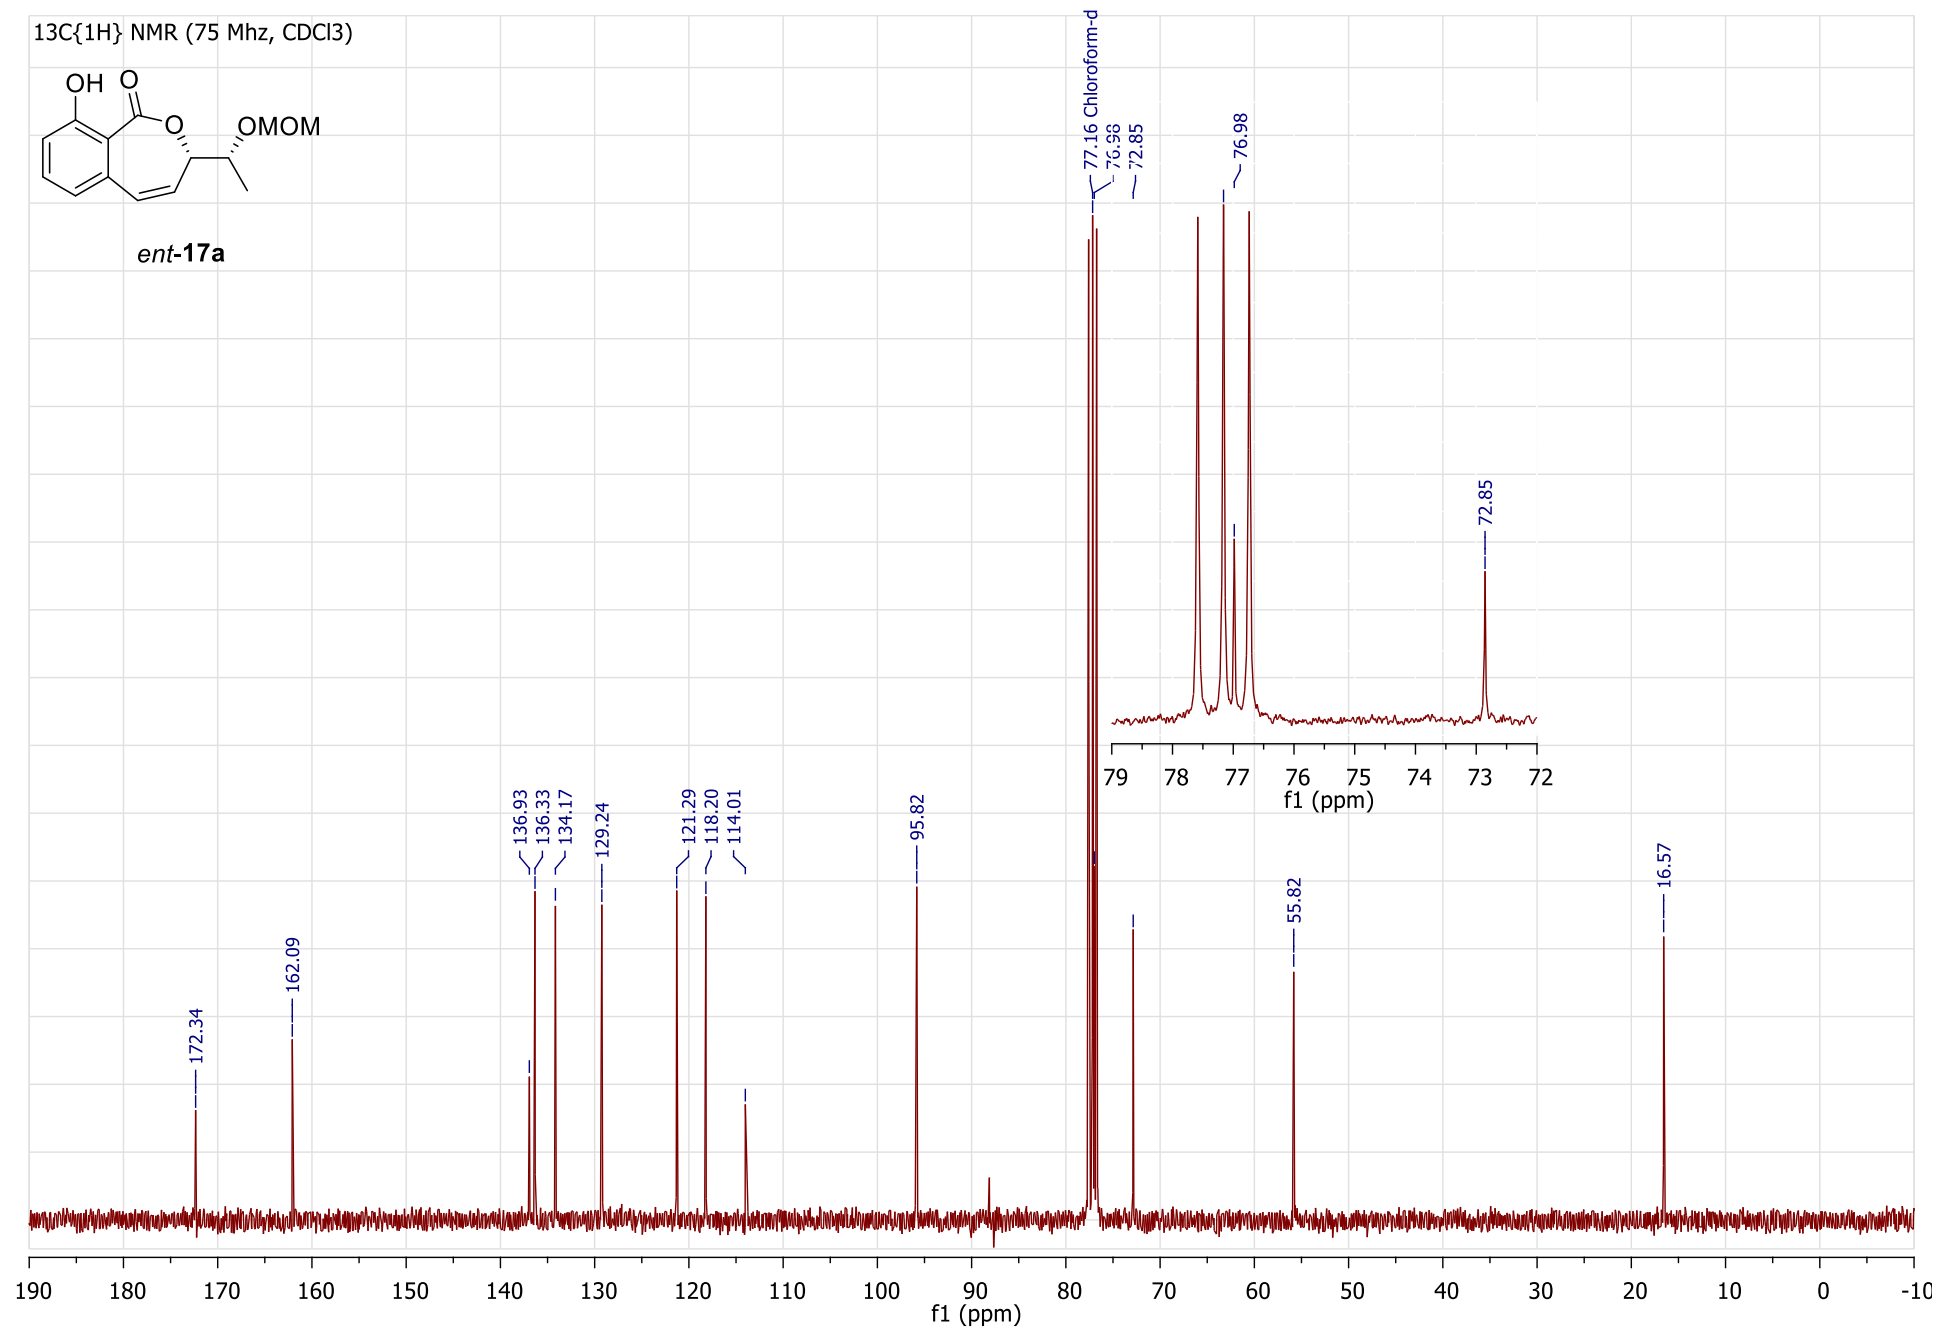

Figure S45.  $^{13}\text{C}$  NMR spectrum of *ent-17a*.

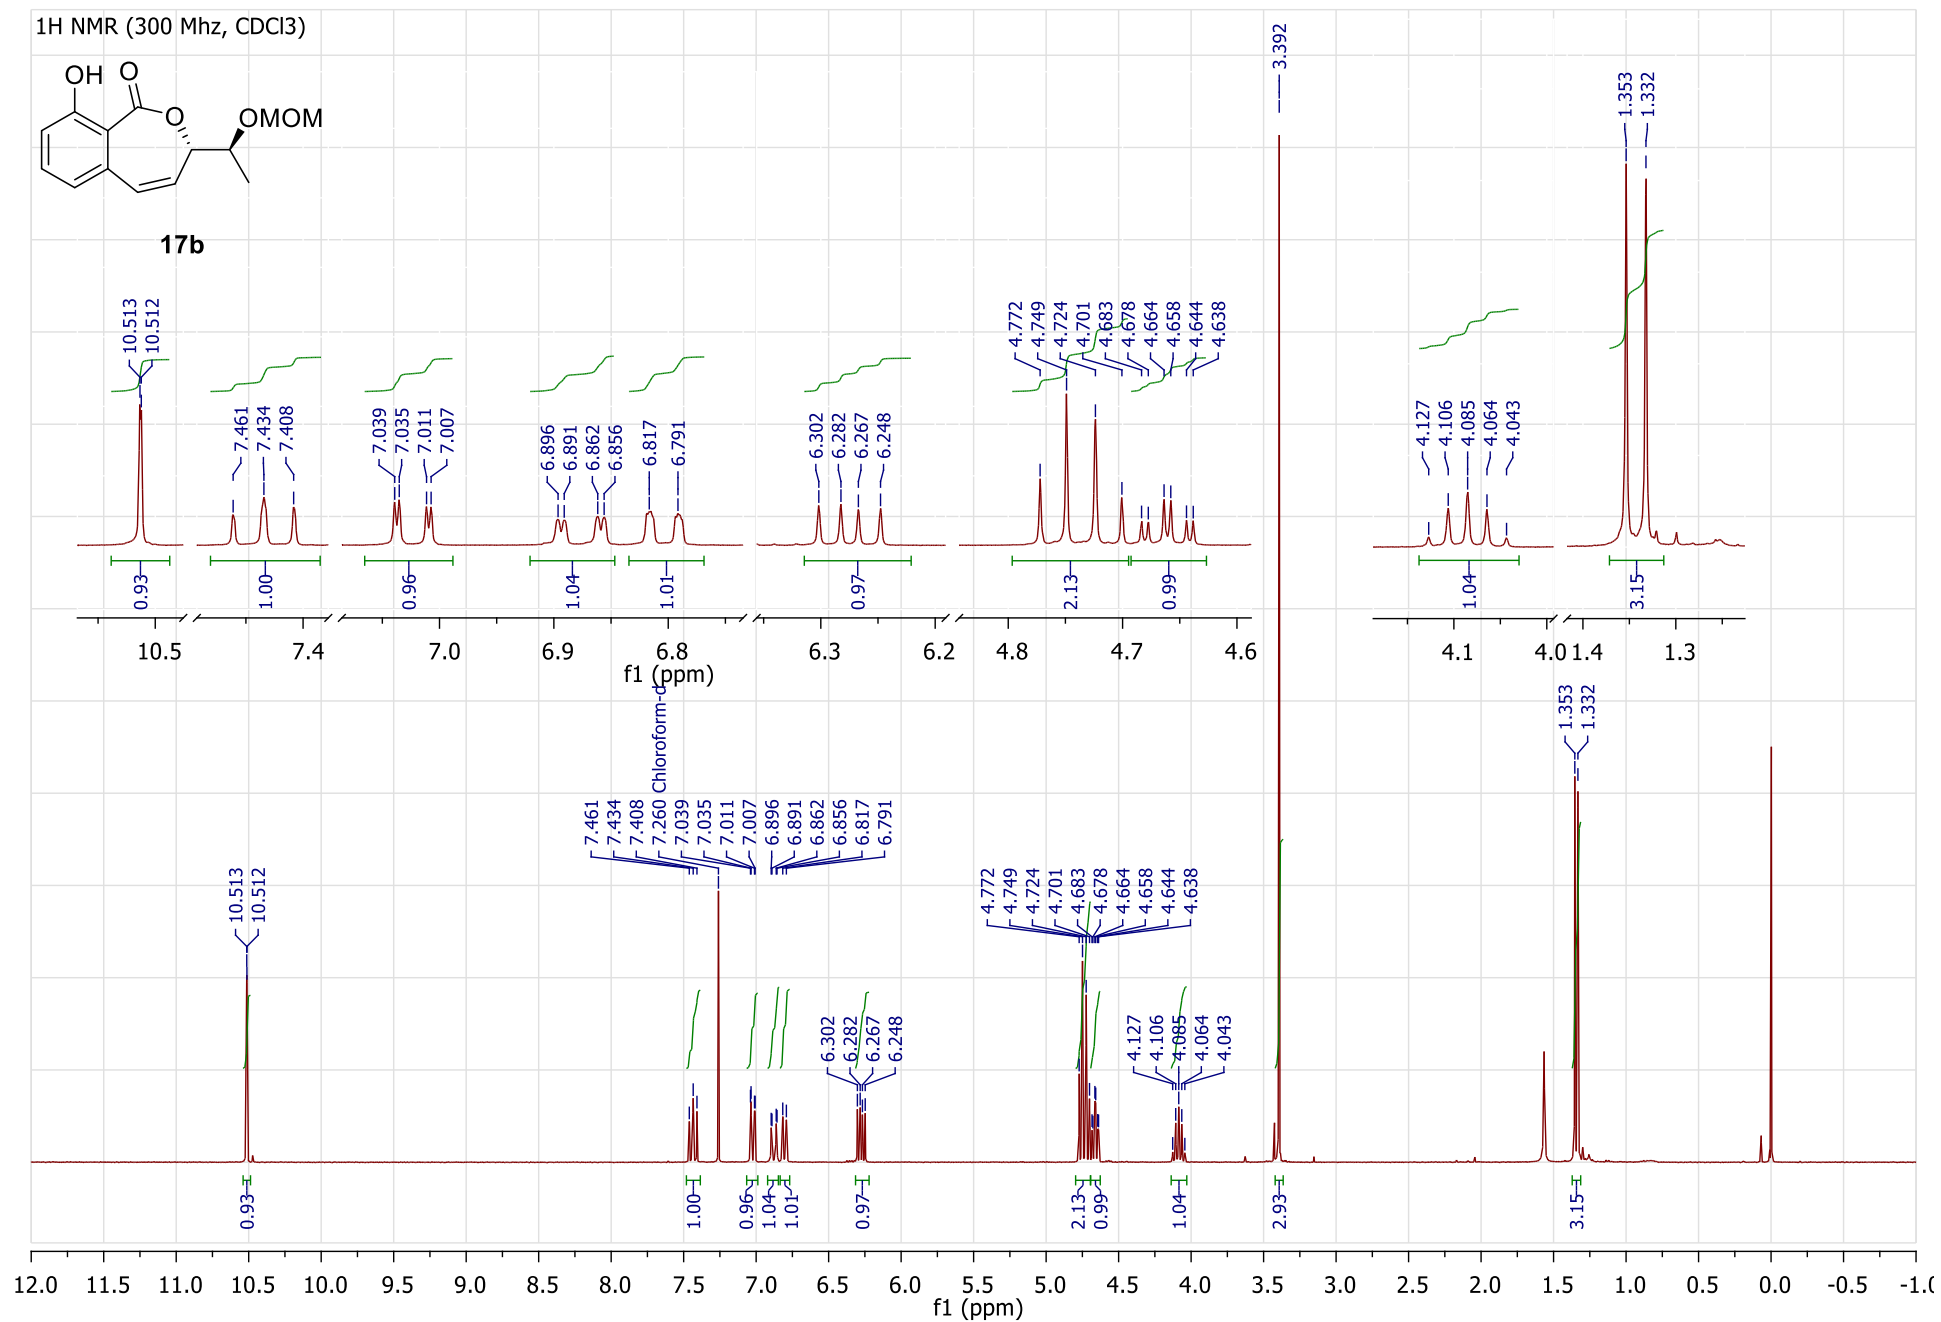

Figure S46. <sup>1</sup>H NMR spectrum of 17b.

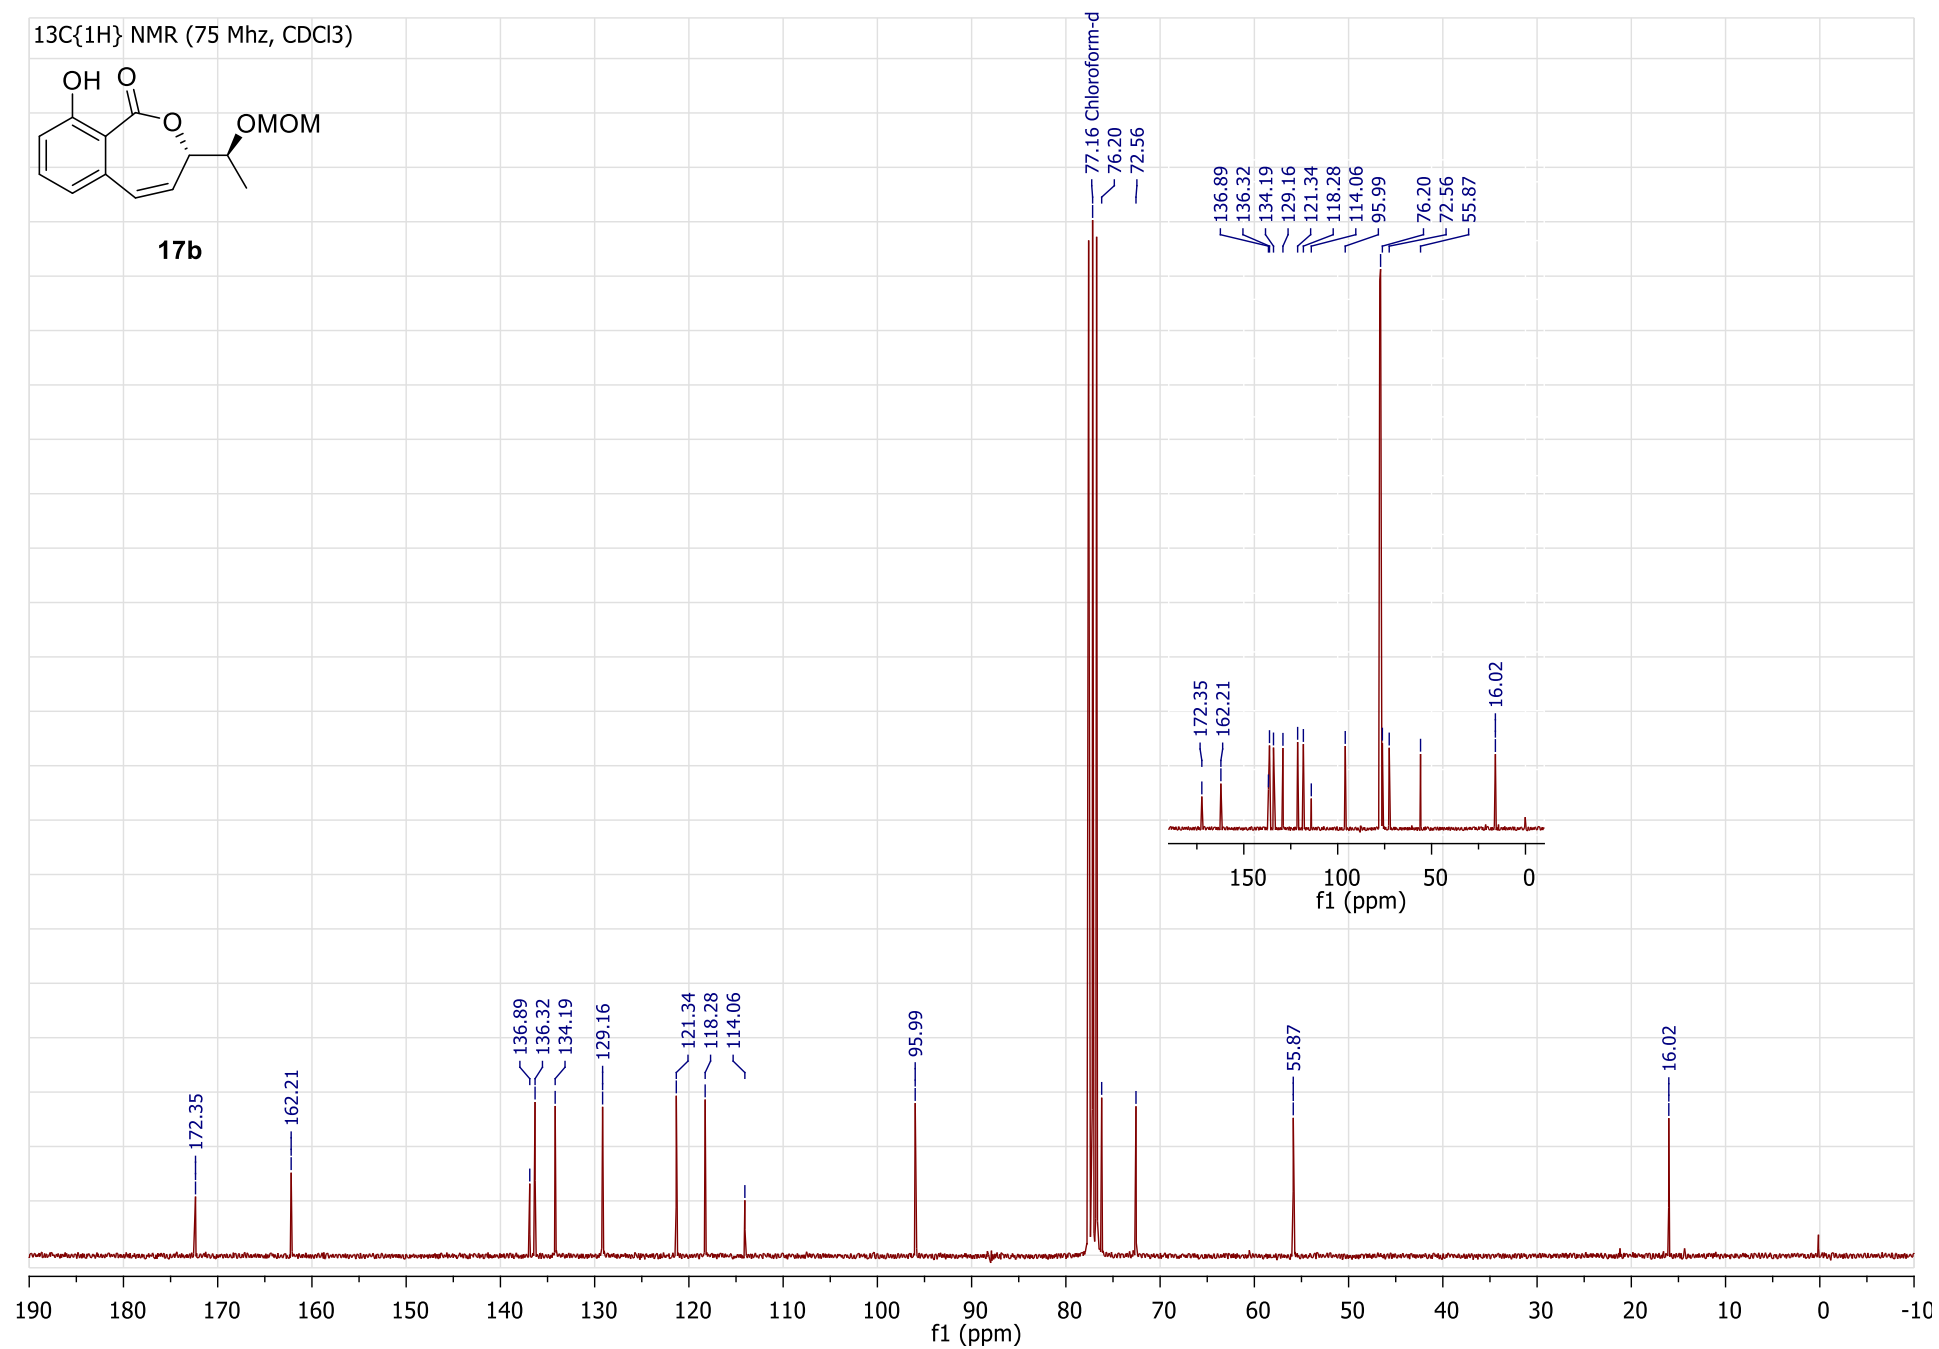

Figure S47.  $^{13}\text{C}$  NMR spectrum of 17b.



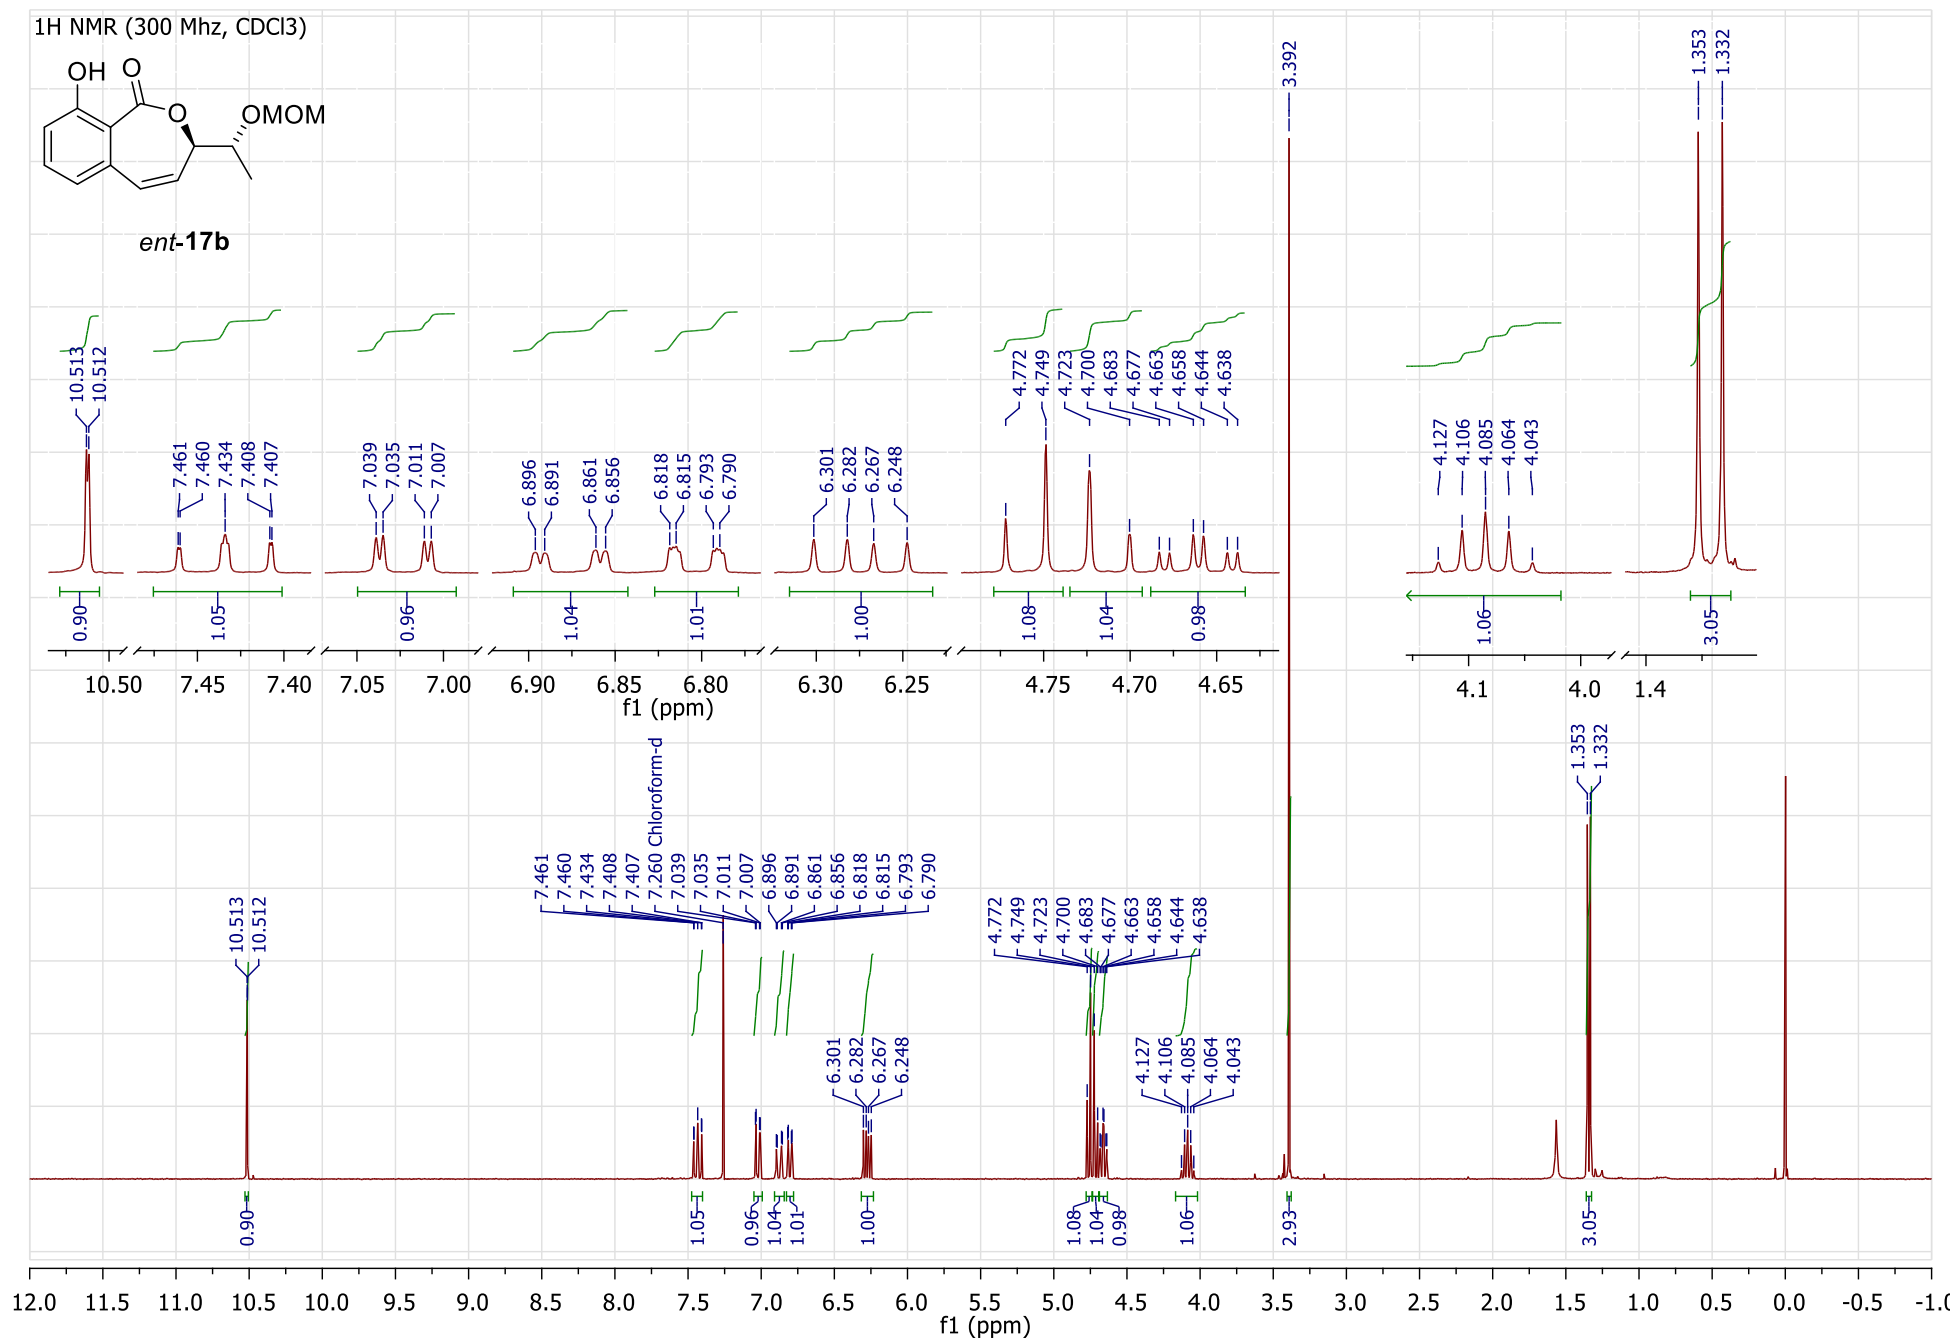

Figure S48. <sup>1</sup>H NMR spectrum of *ent-17b*.

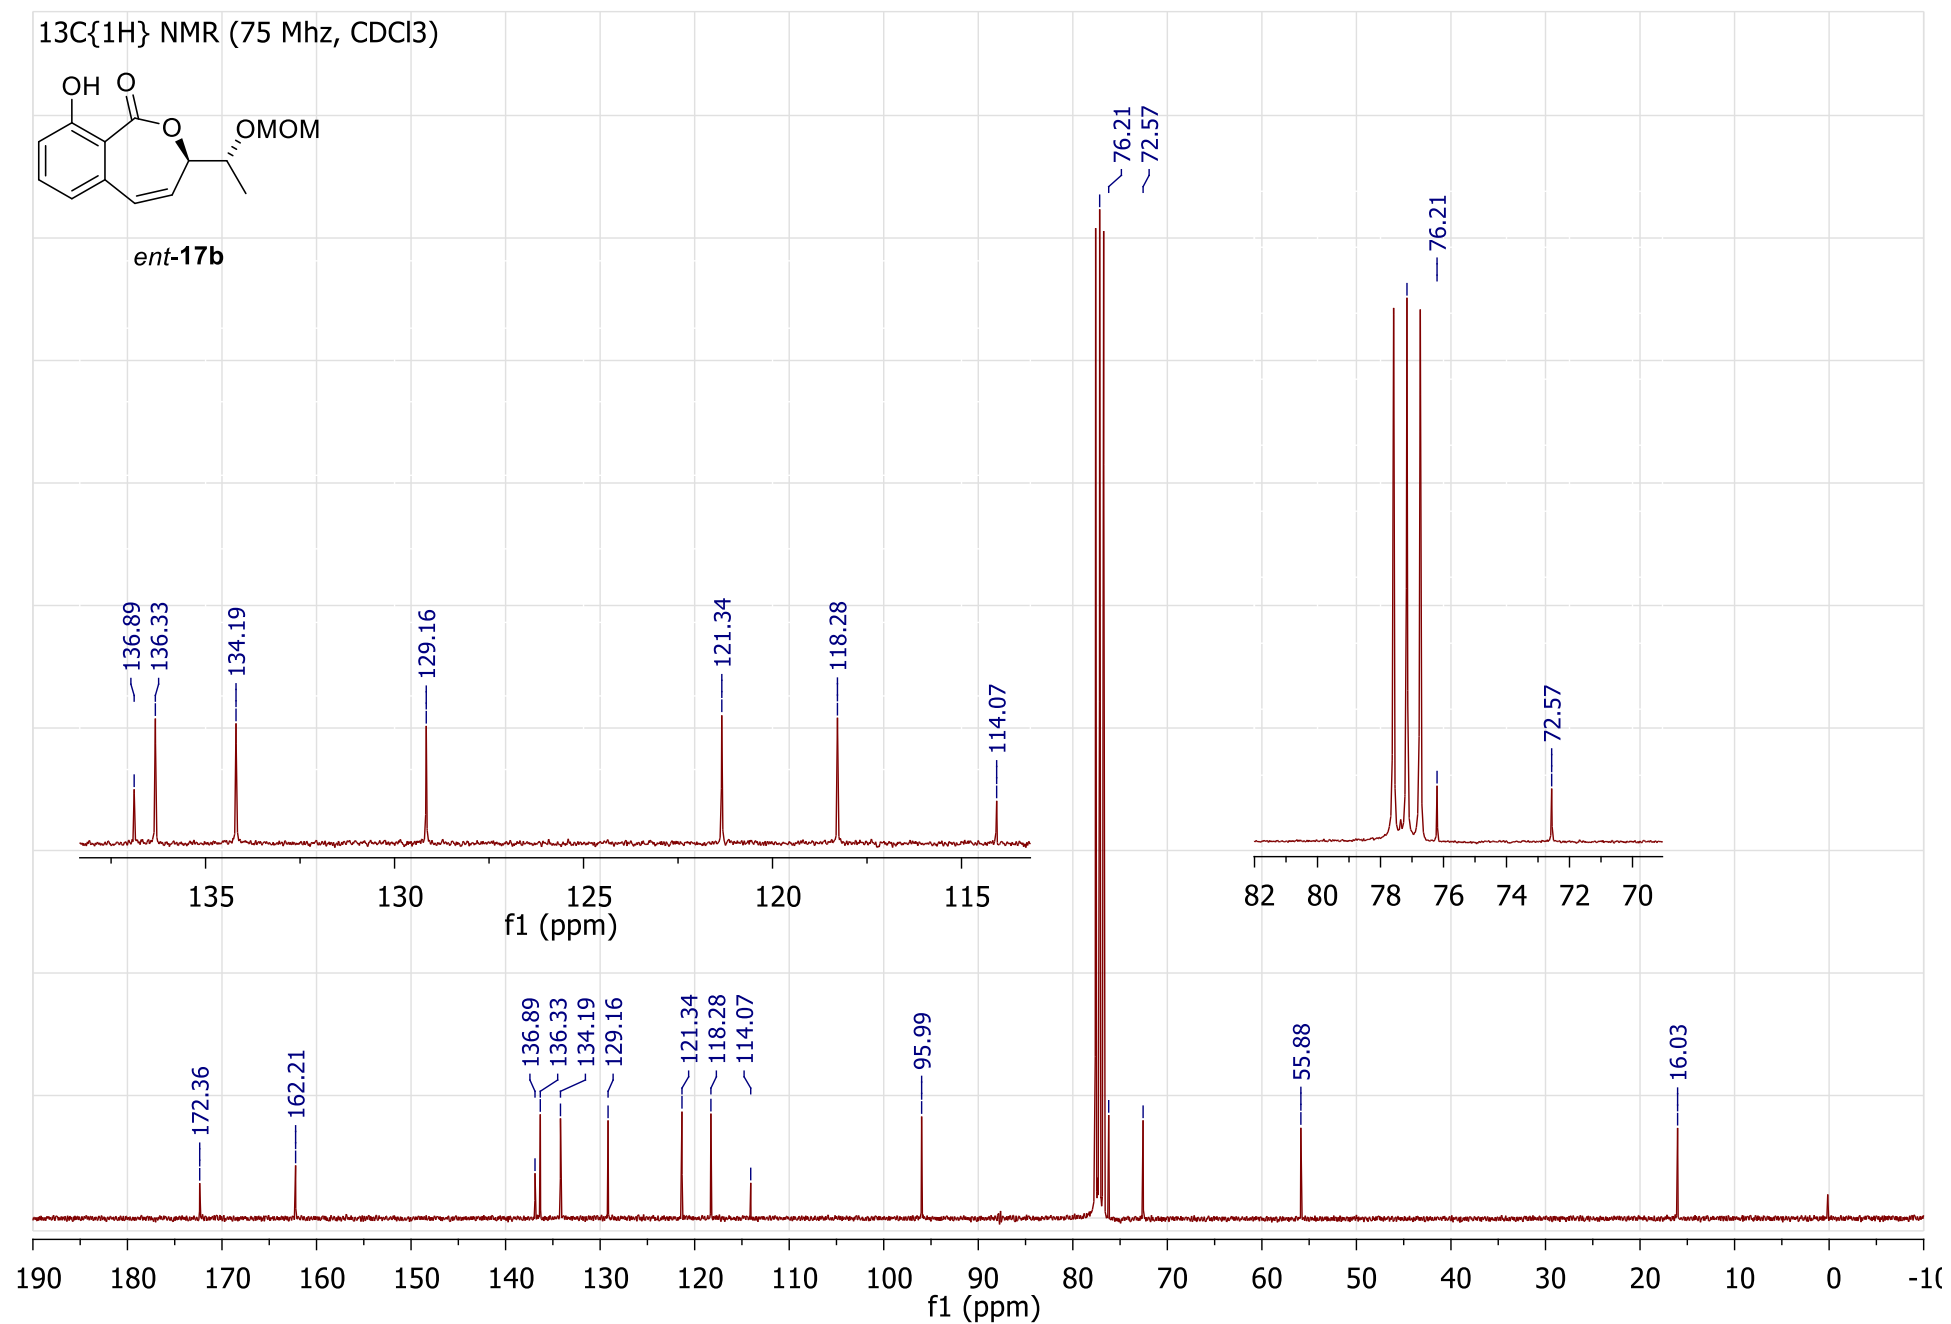

**Figure S49.**  $^{13}\text{C}$  NMR spectrum of **ent-17b**.

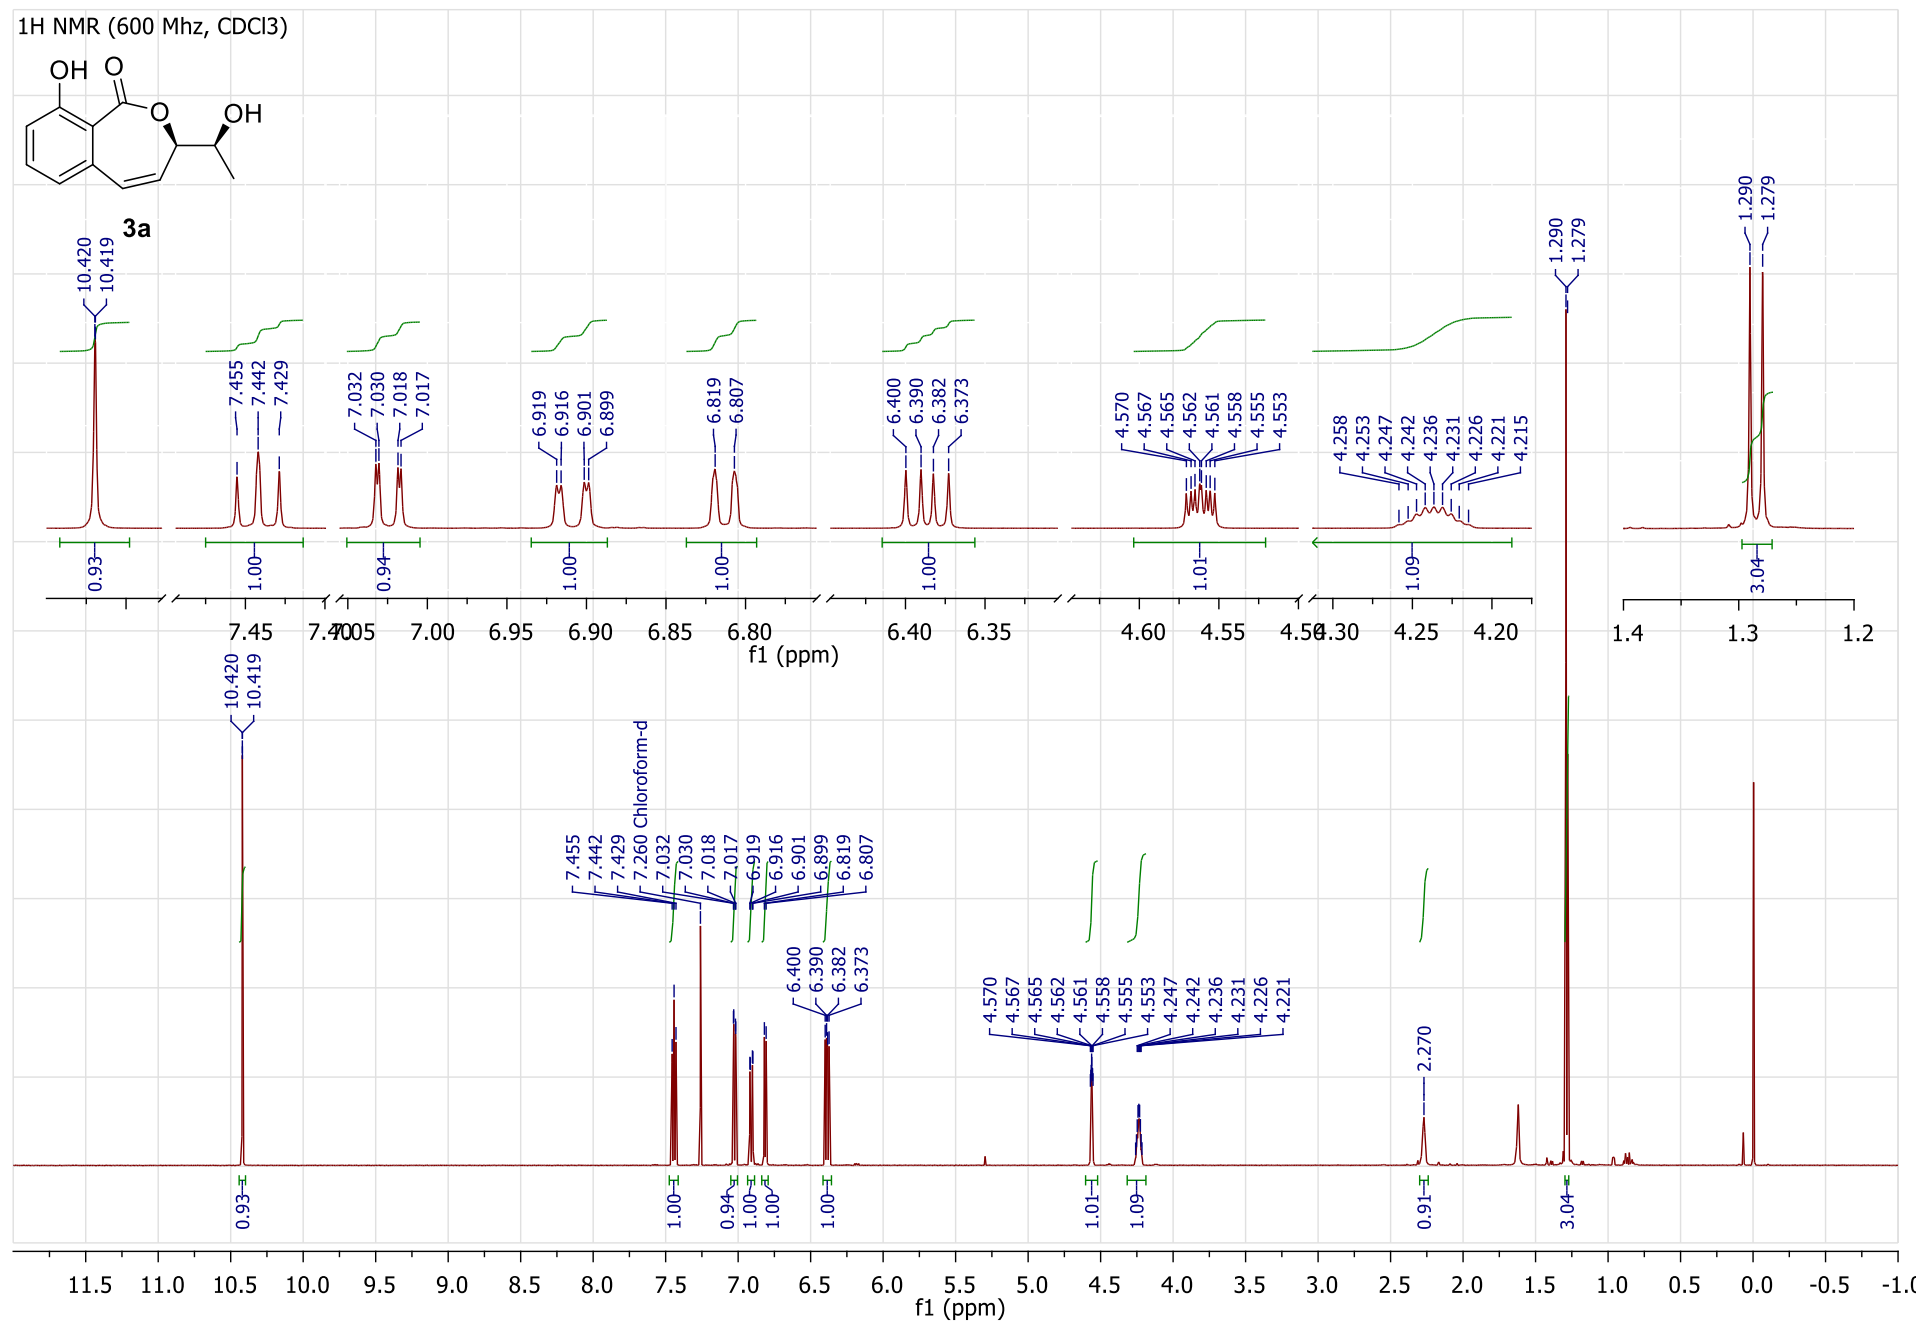

**Figure S50.** <sup>1</sup>H NMR spectrum of **3a** in CDCl<sub>3</sub>.

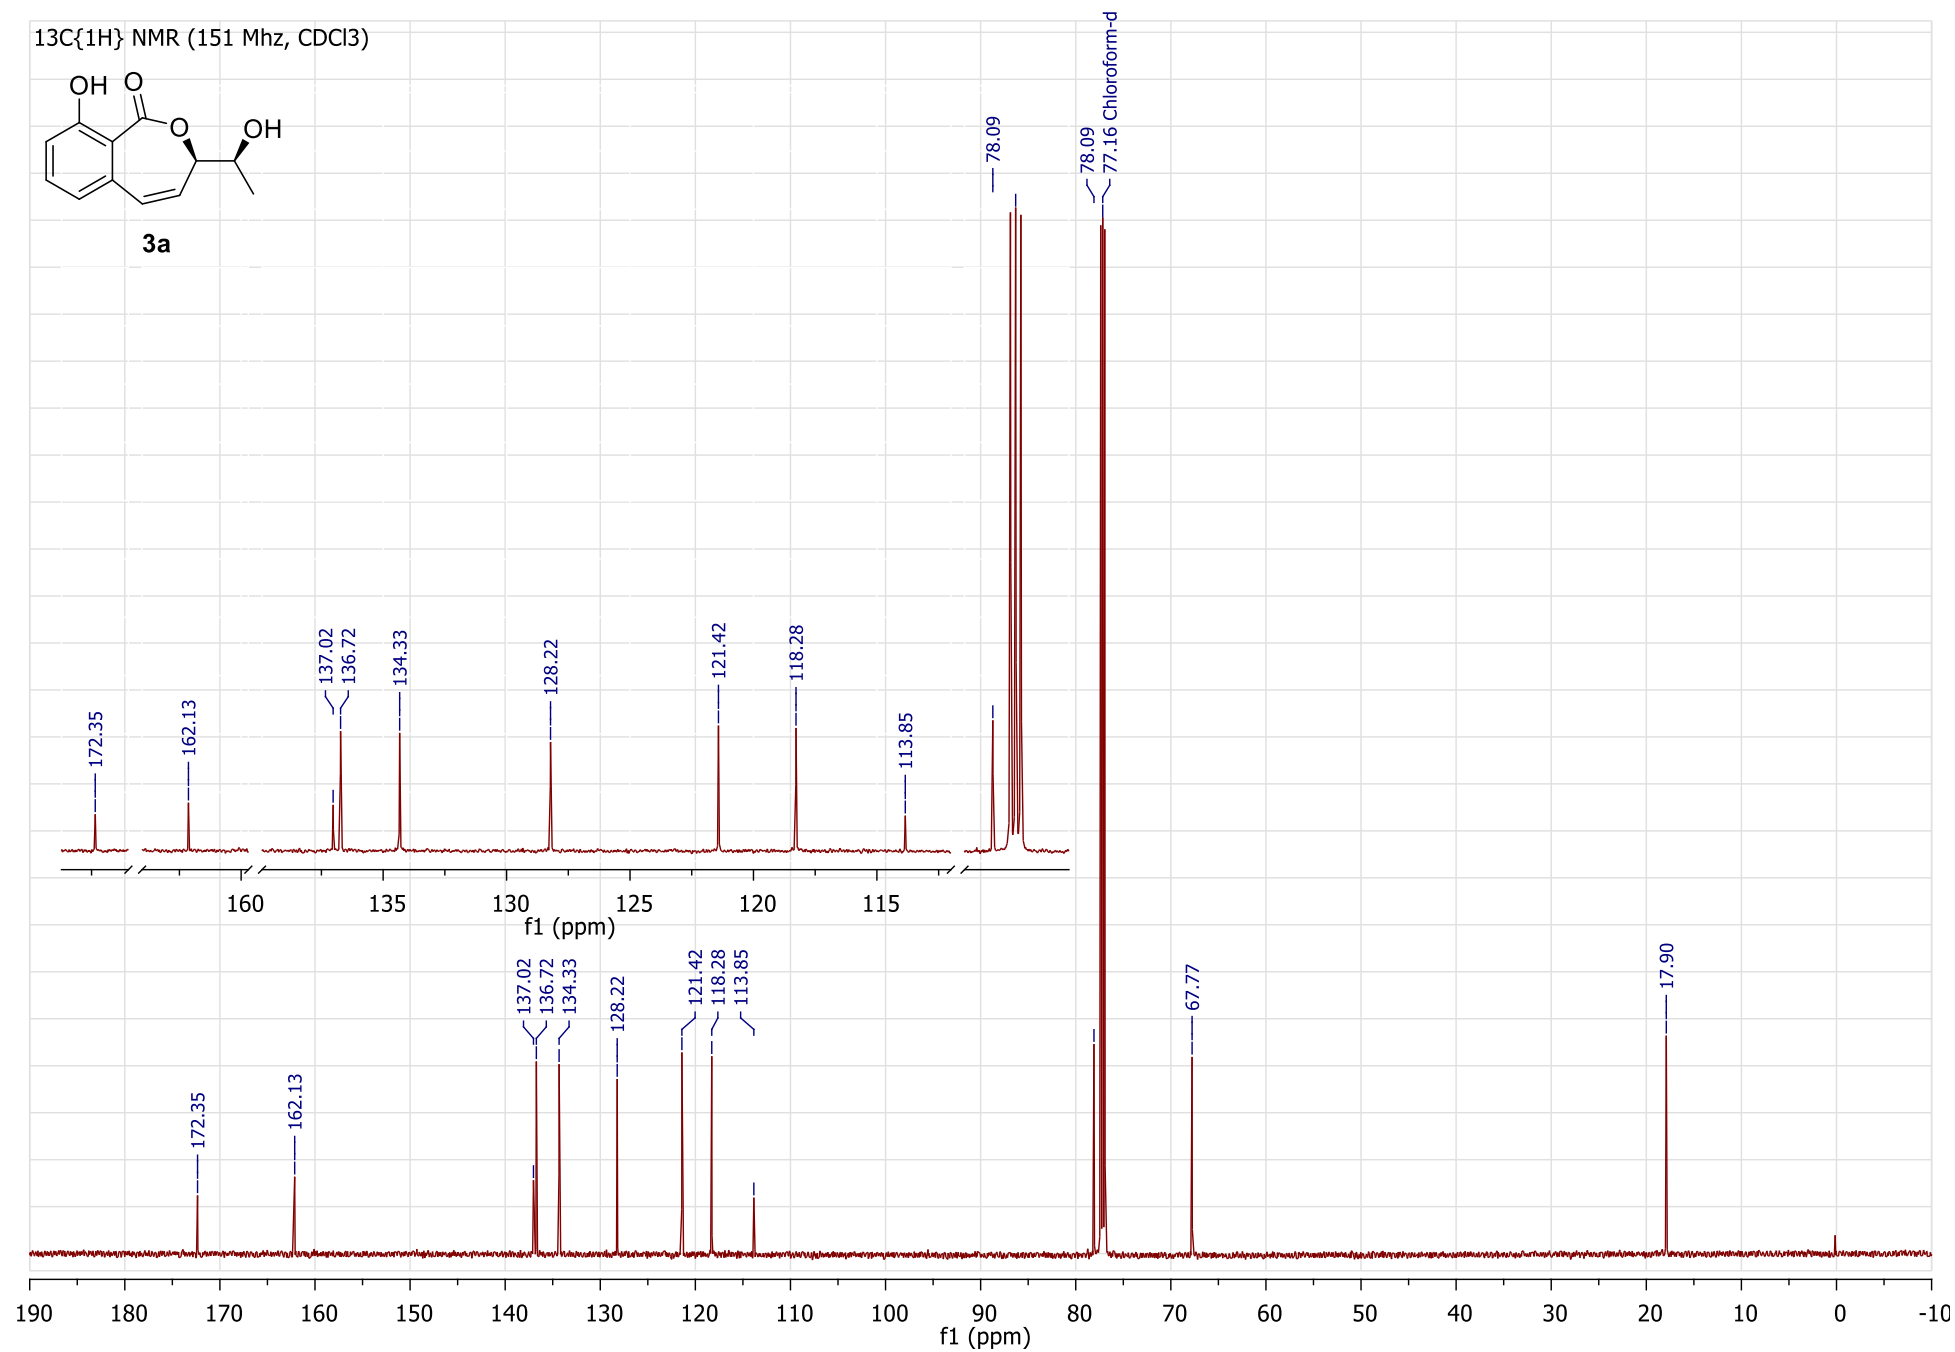

**Figure S51.**  $^{13}\text{C}$  NMR spectrum of **3a** in  $\text{CDCl}_3$ .

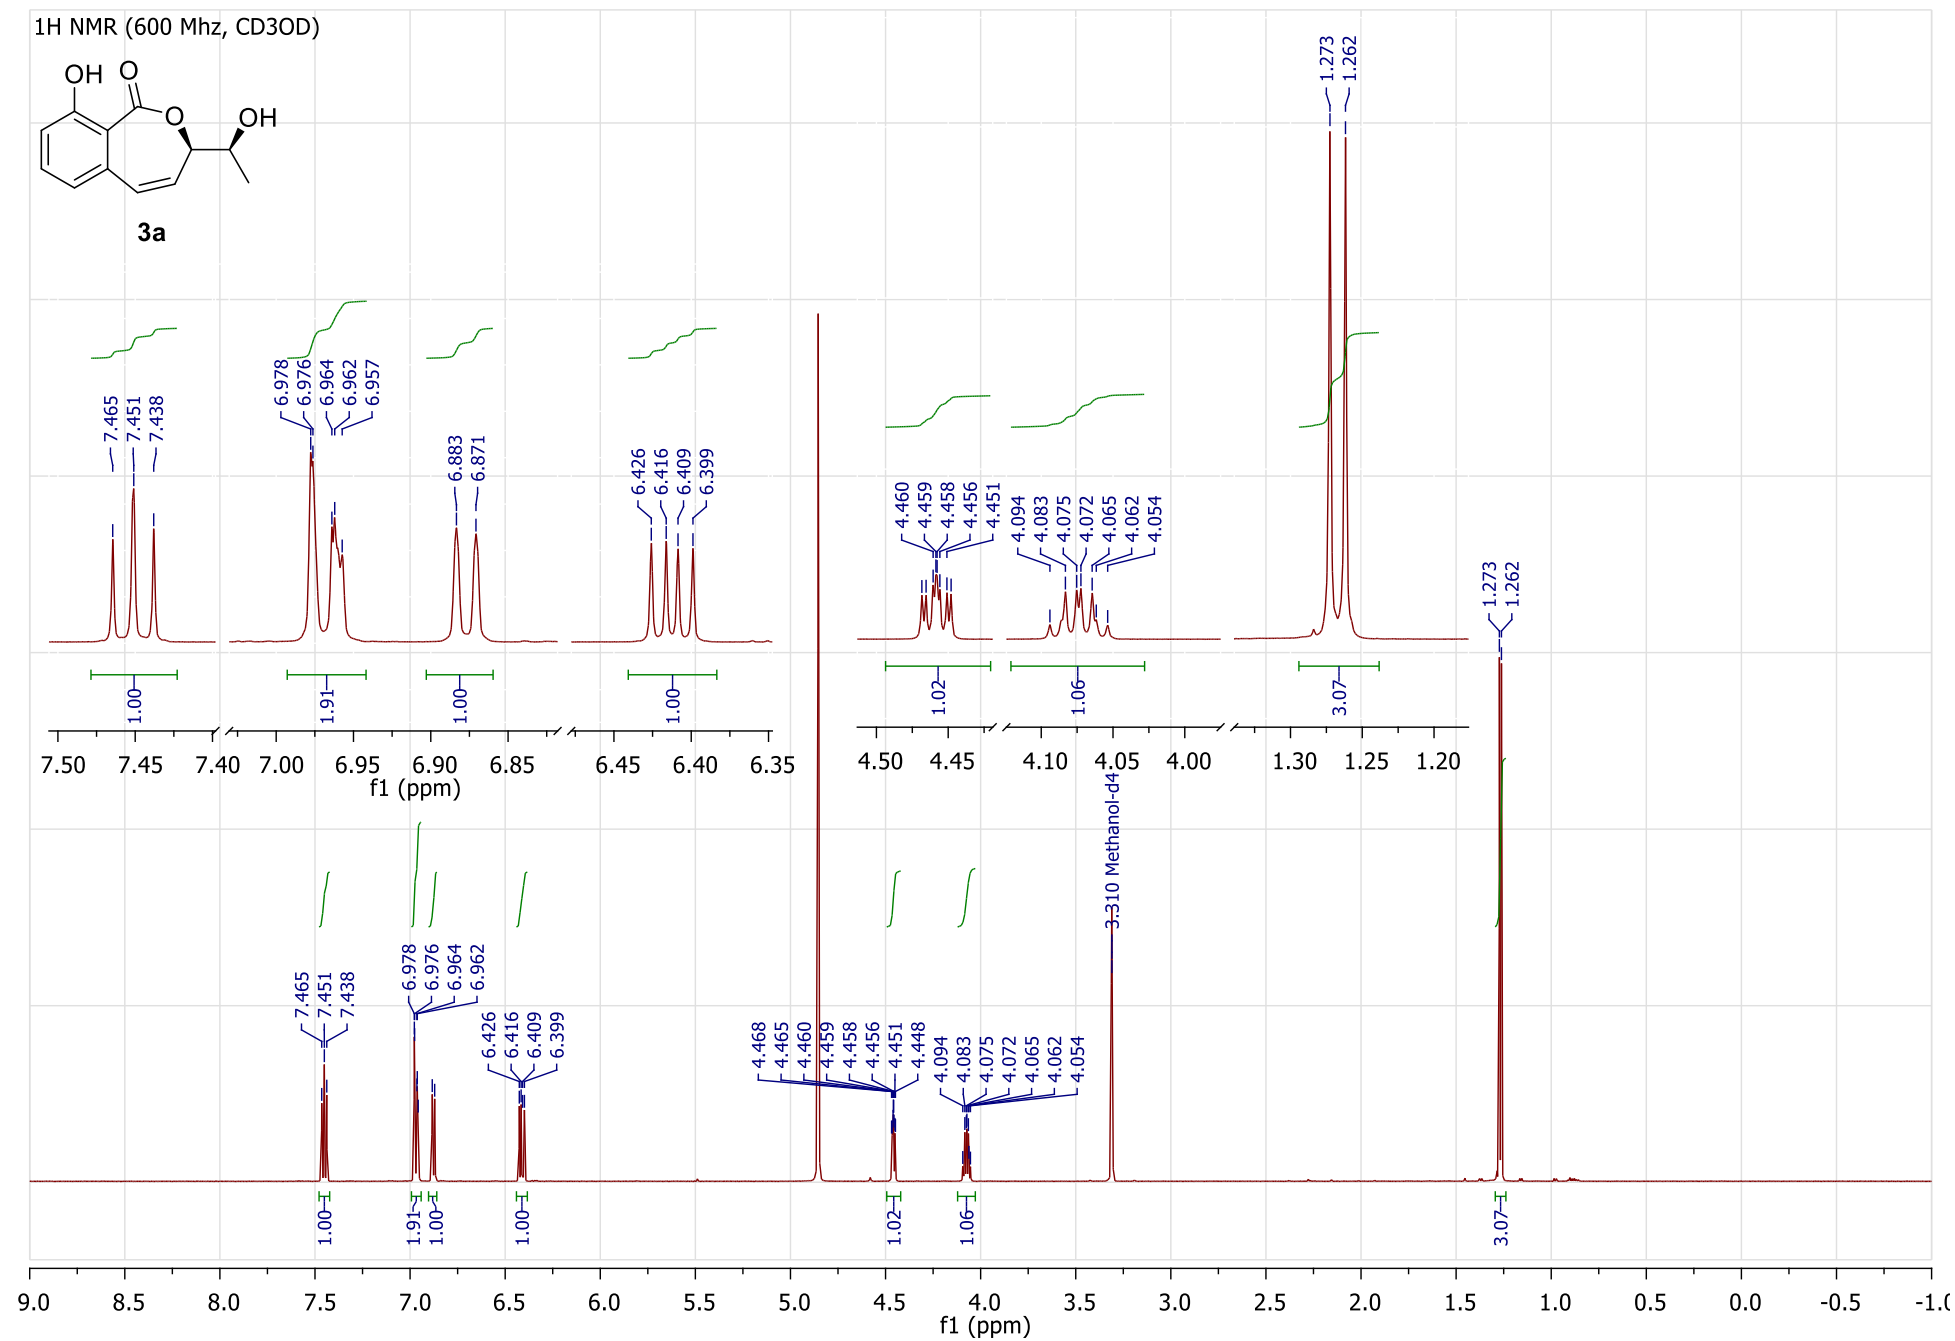

**Figure S52.** <sup>1</sup>H NMR spectrum of **3a** in CD<sub>3</sub>OD.

$^{13}\text{C}\{^1\text{H}\}$  NMR (151 Mhz,  $\text{CD}_3\text{OD}$ )

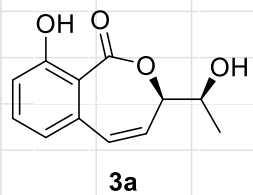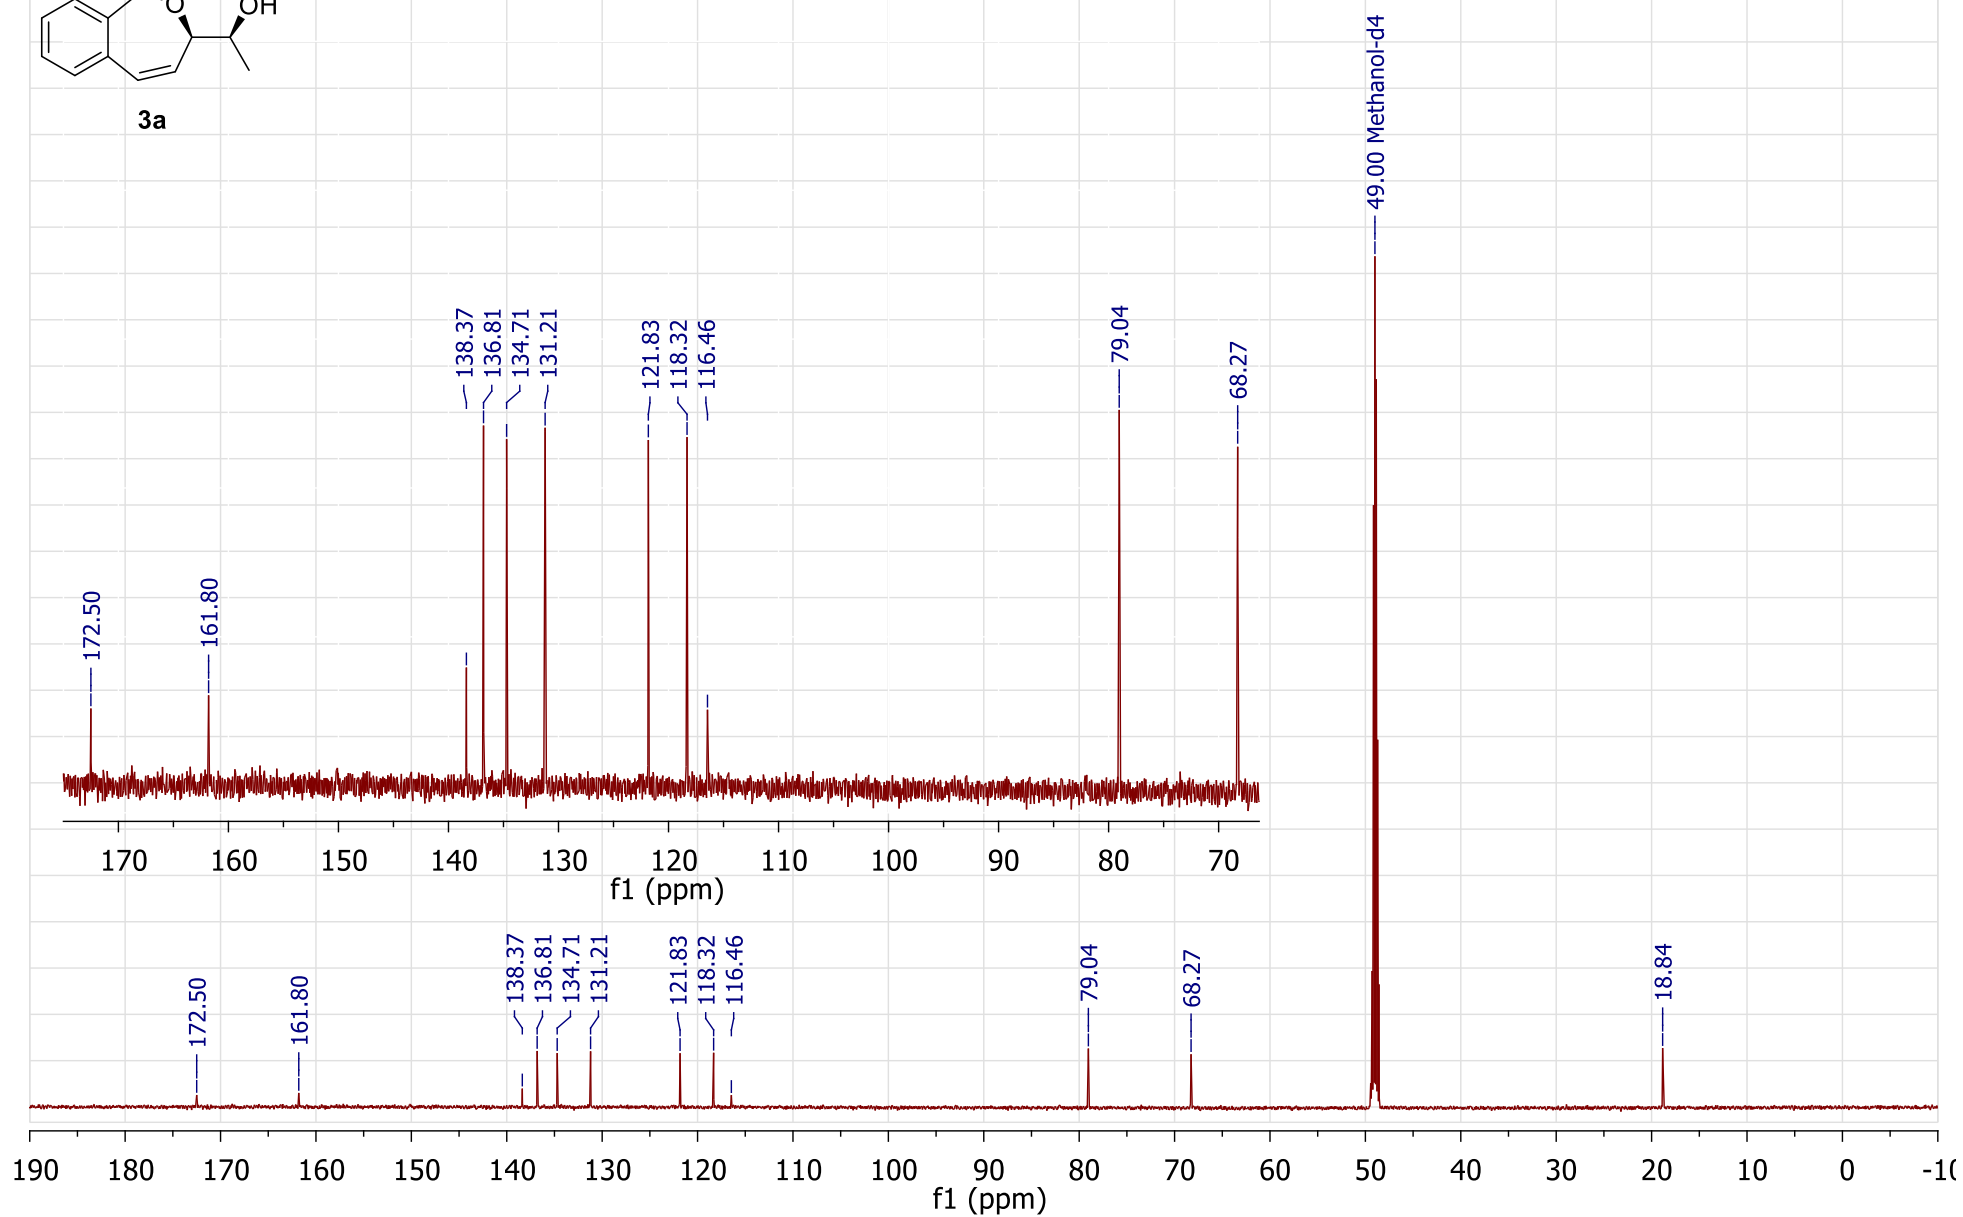

**Figure S53.**  $^{13}\text{C}$  NMR spectrum of **3a** in  $\text{CD}_3\text{OD}$ .

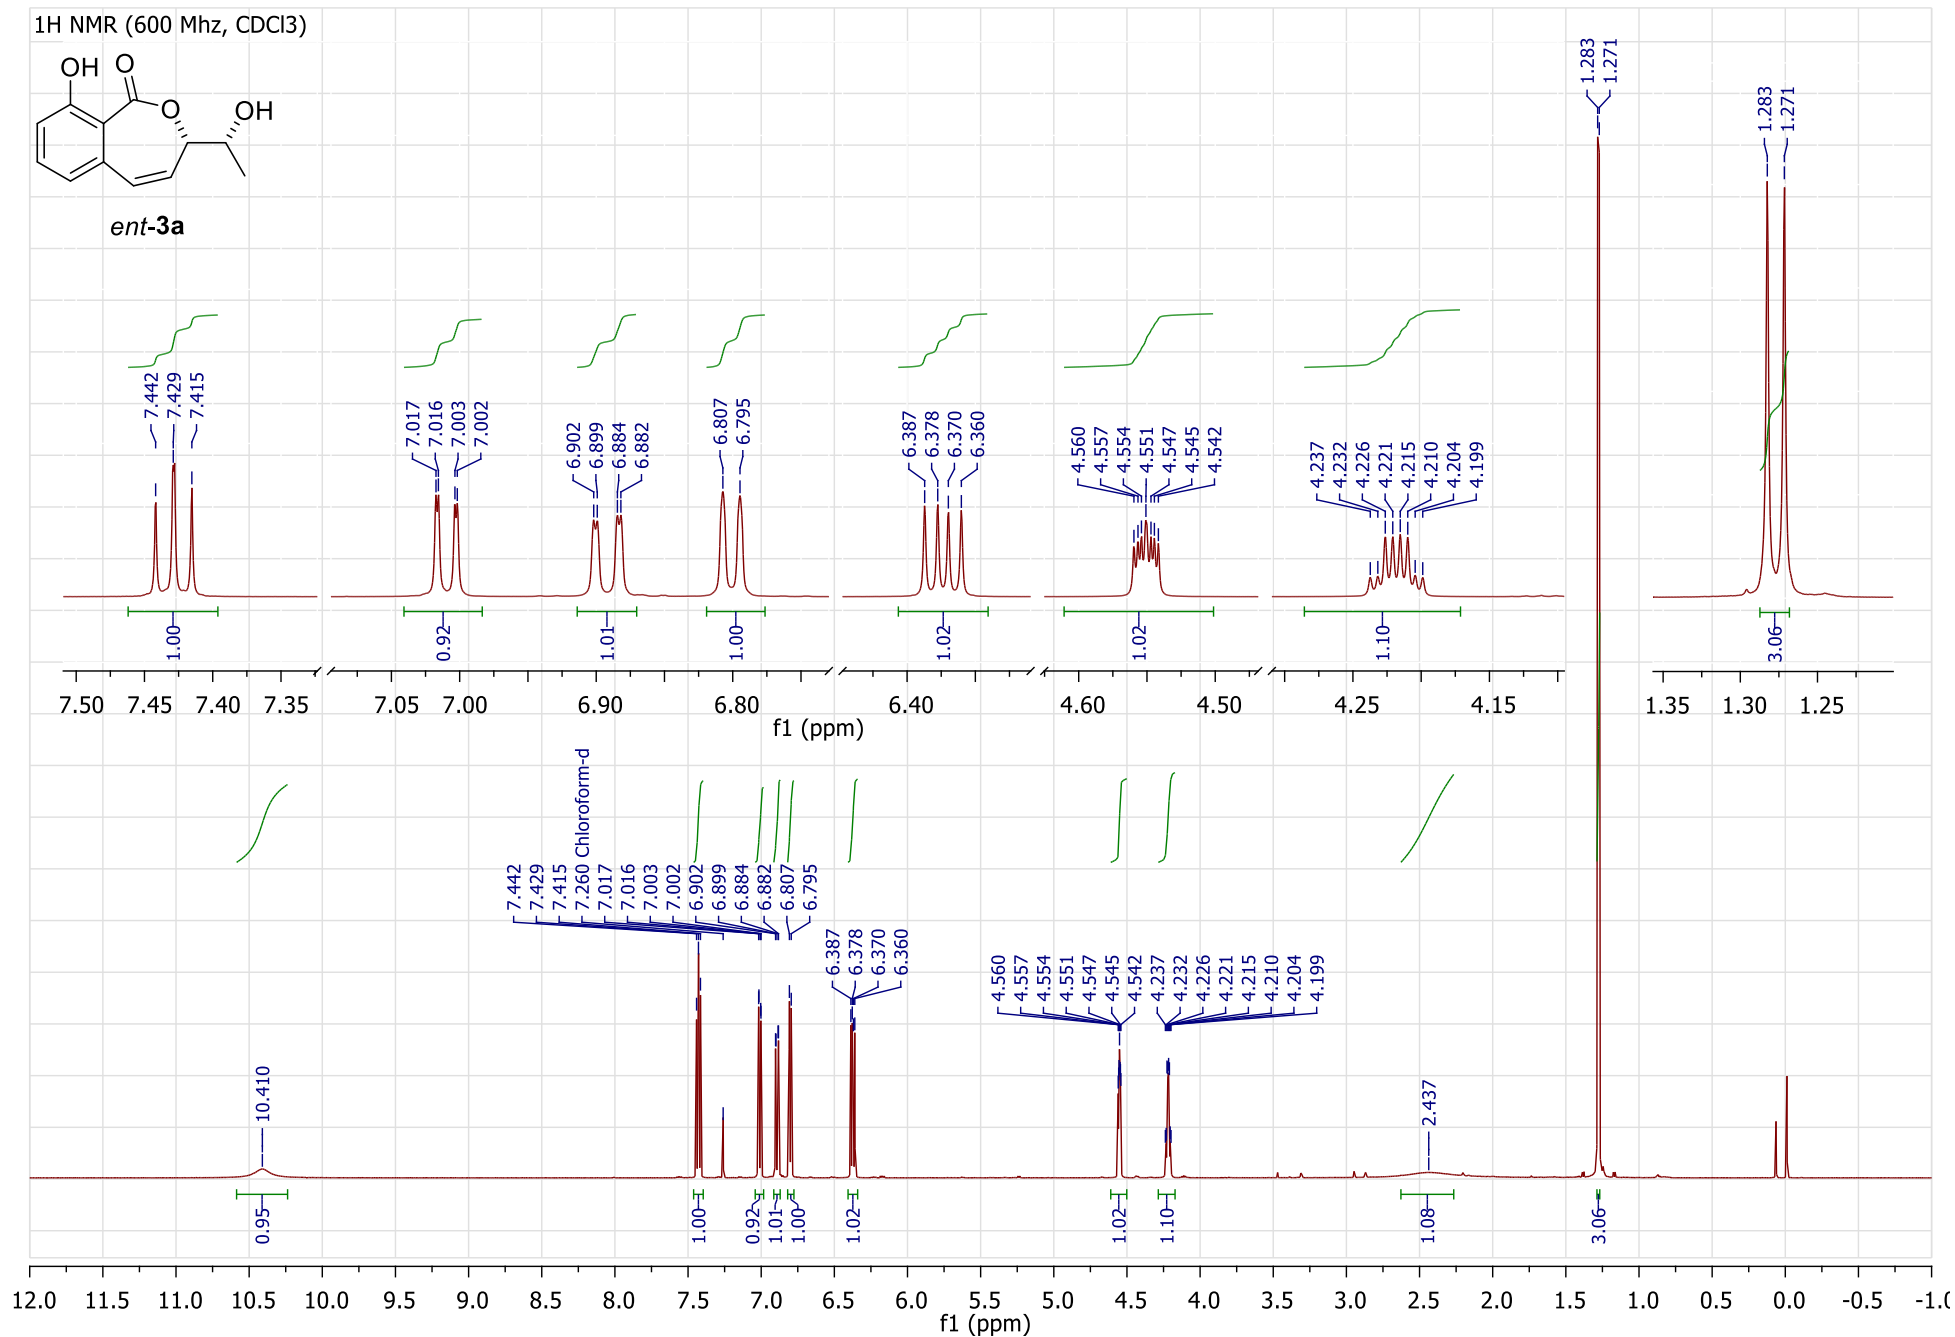

**Figure S54.** <sup>1</sup>H NMR spectrum of **ent-3a** in CDCl<sub>3</sub>.

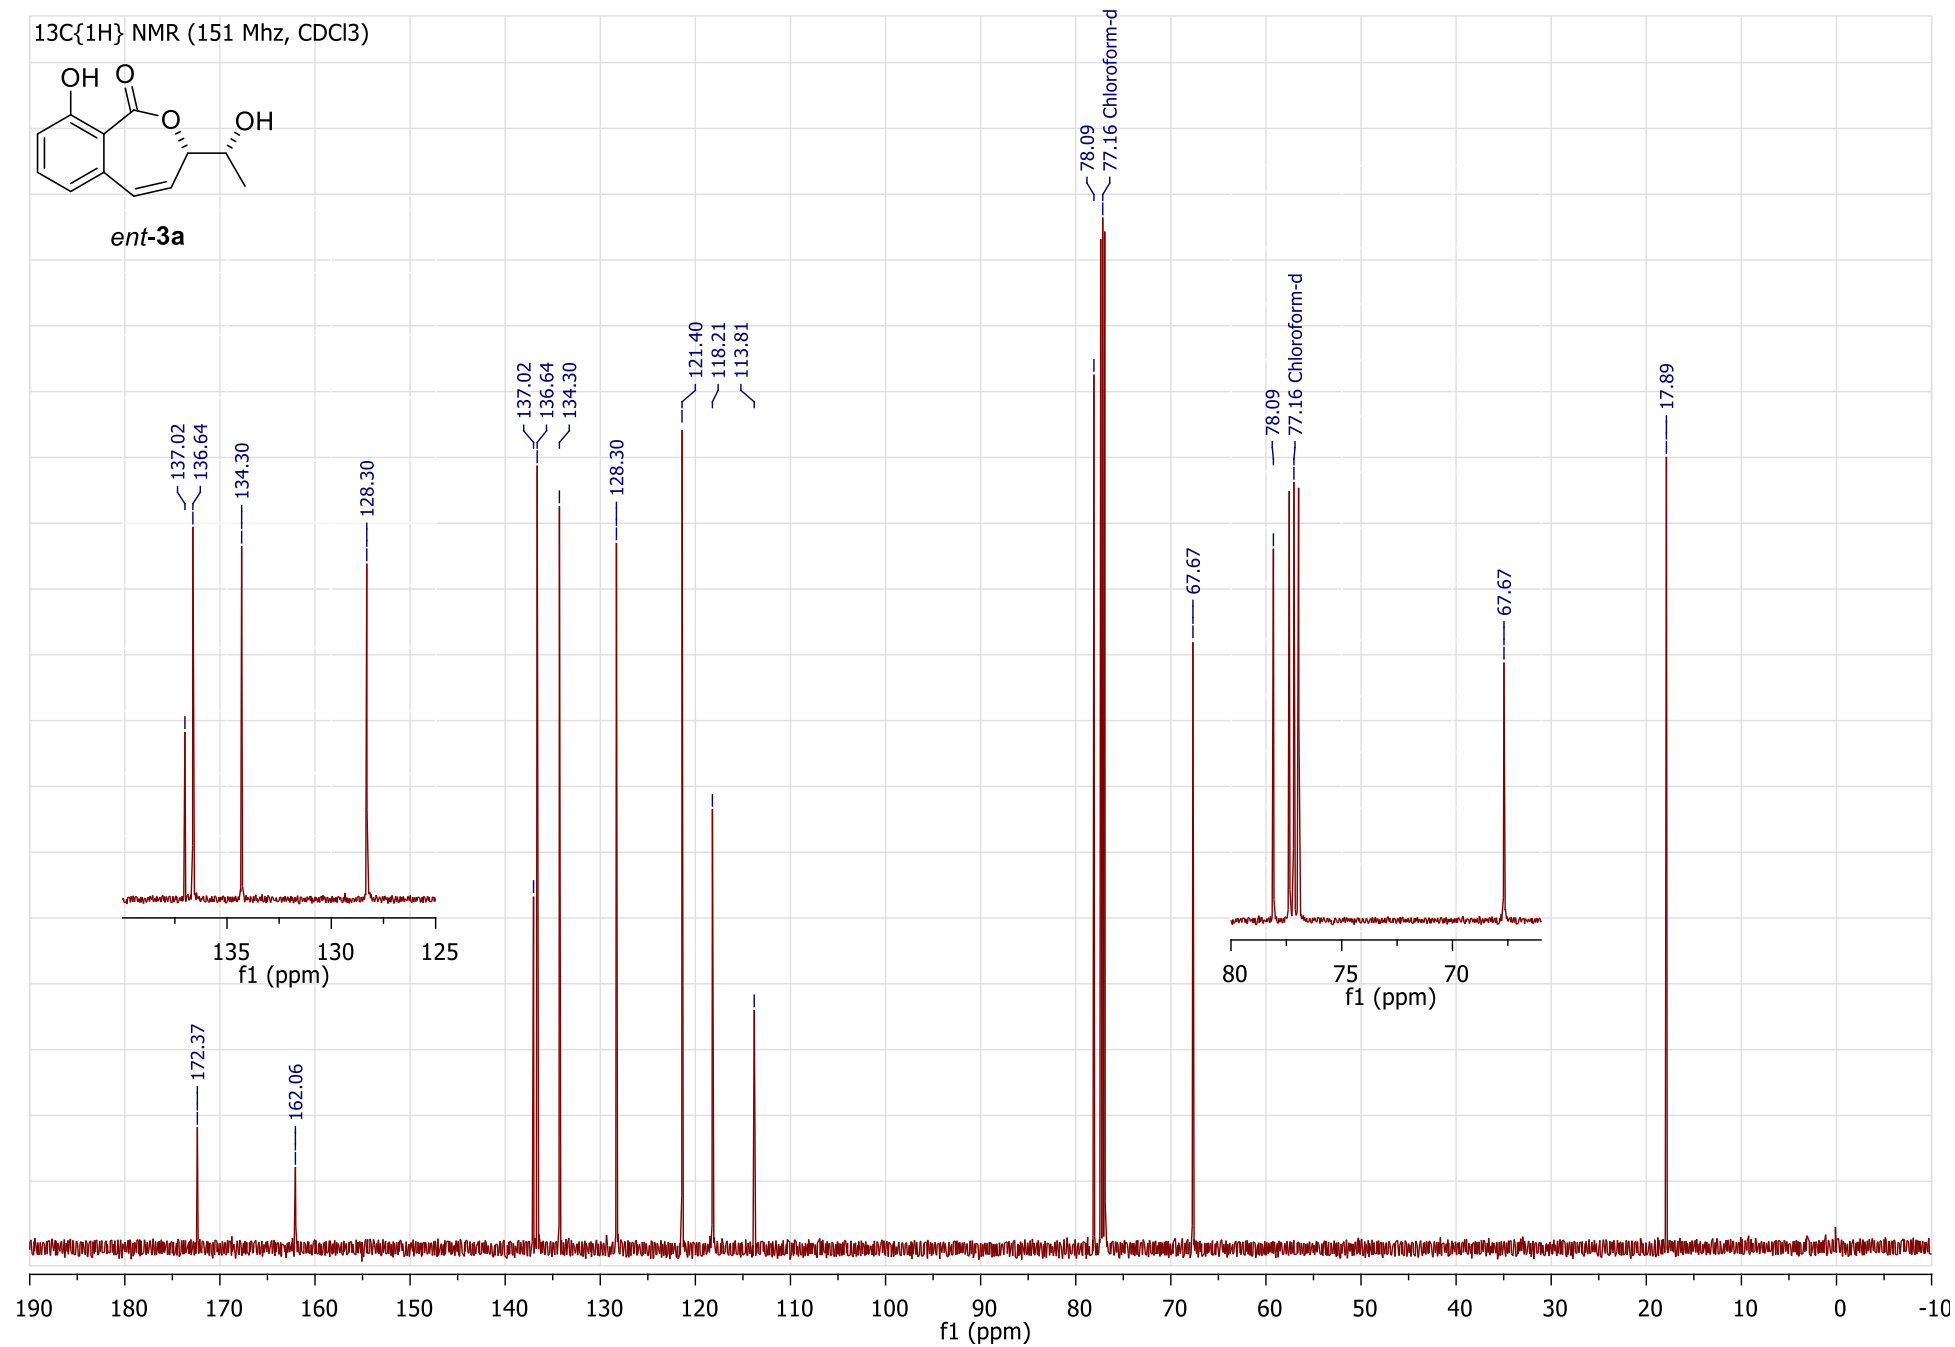

**Figure S55.**  $^{13}\text{C}$  NMR spectrum of **ent-3a** in  $\text{CDCl}_3$ .



<sup>1</sup>H NMR (600 Mhz, CD<sub>3</sub>OD)

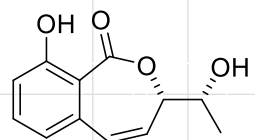

*ent*-**3a**

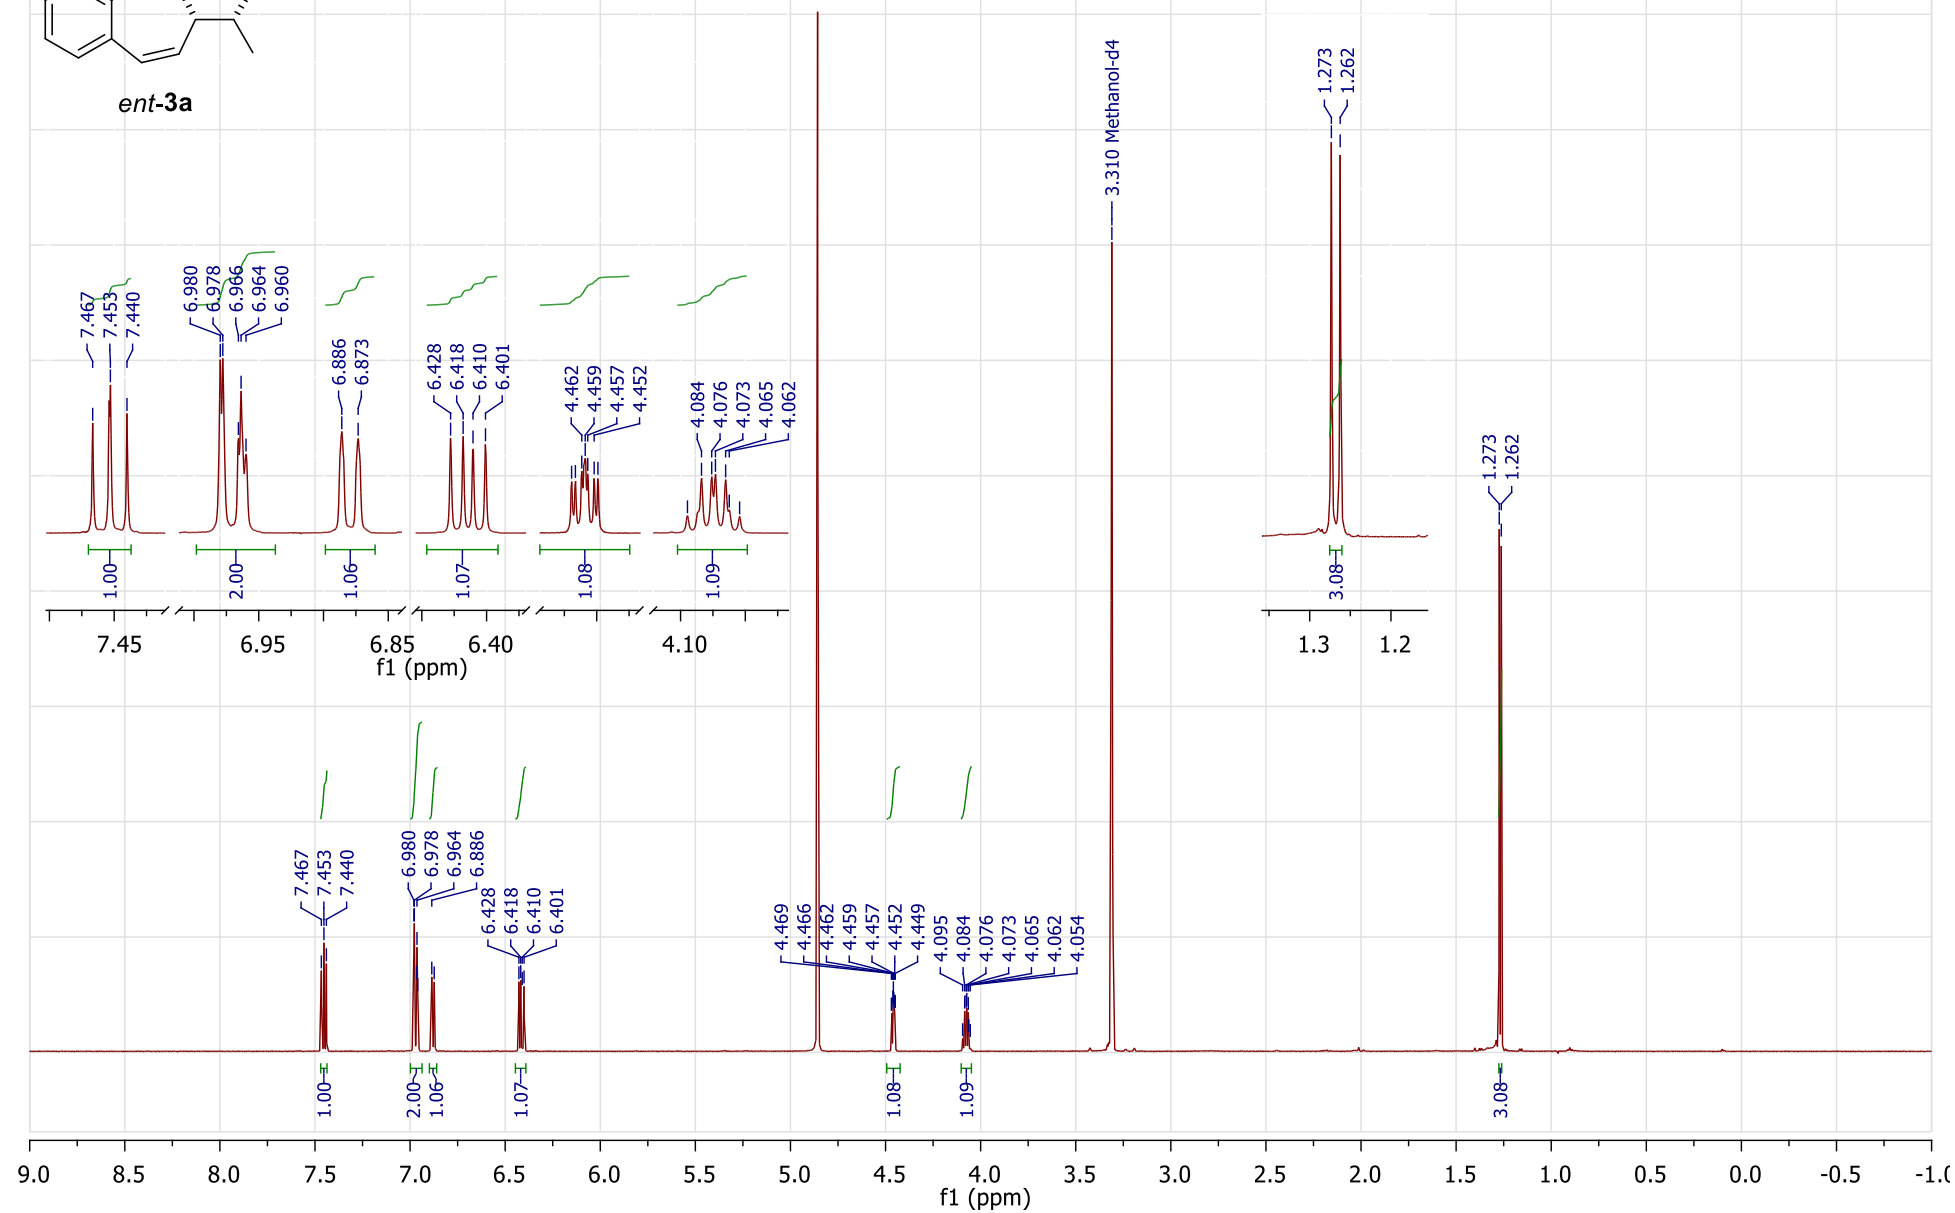

Figure S56. <sup>1</sup>H NMR spectrum of *ent*-**3a** in CD<sub>3</sub>OD.

$^{13}\text{C}\{^1\text{H}\}$  NMR (151 Mhz,  $\text{CD}_3\text{OD}$ )

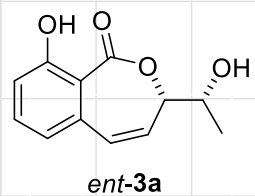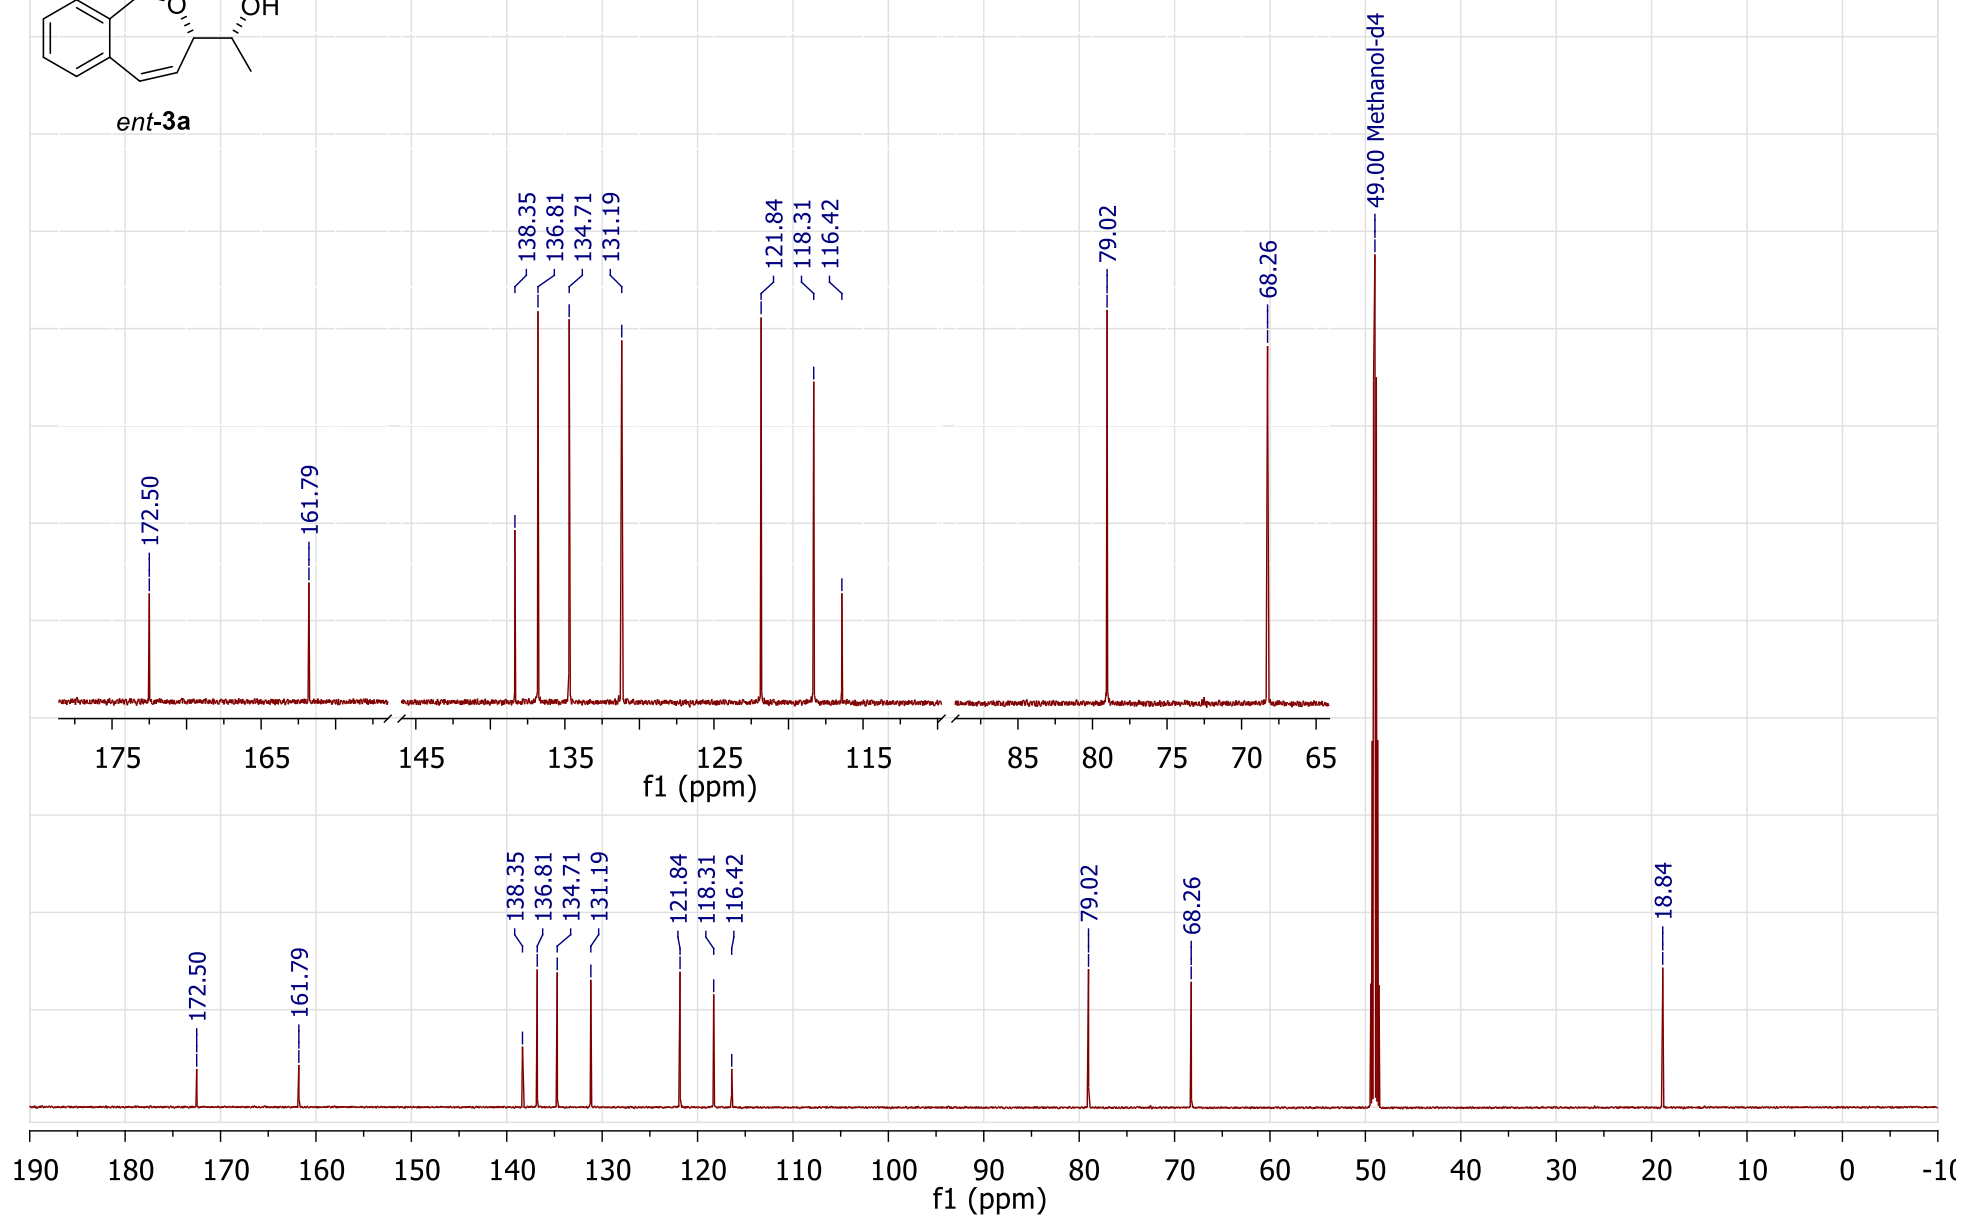

**Figure S57.**  $^{13}\text{C}$  NMR spectrum of *ent-3a* in  $\text{CD}_3\text{OD}$ .

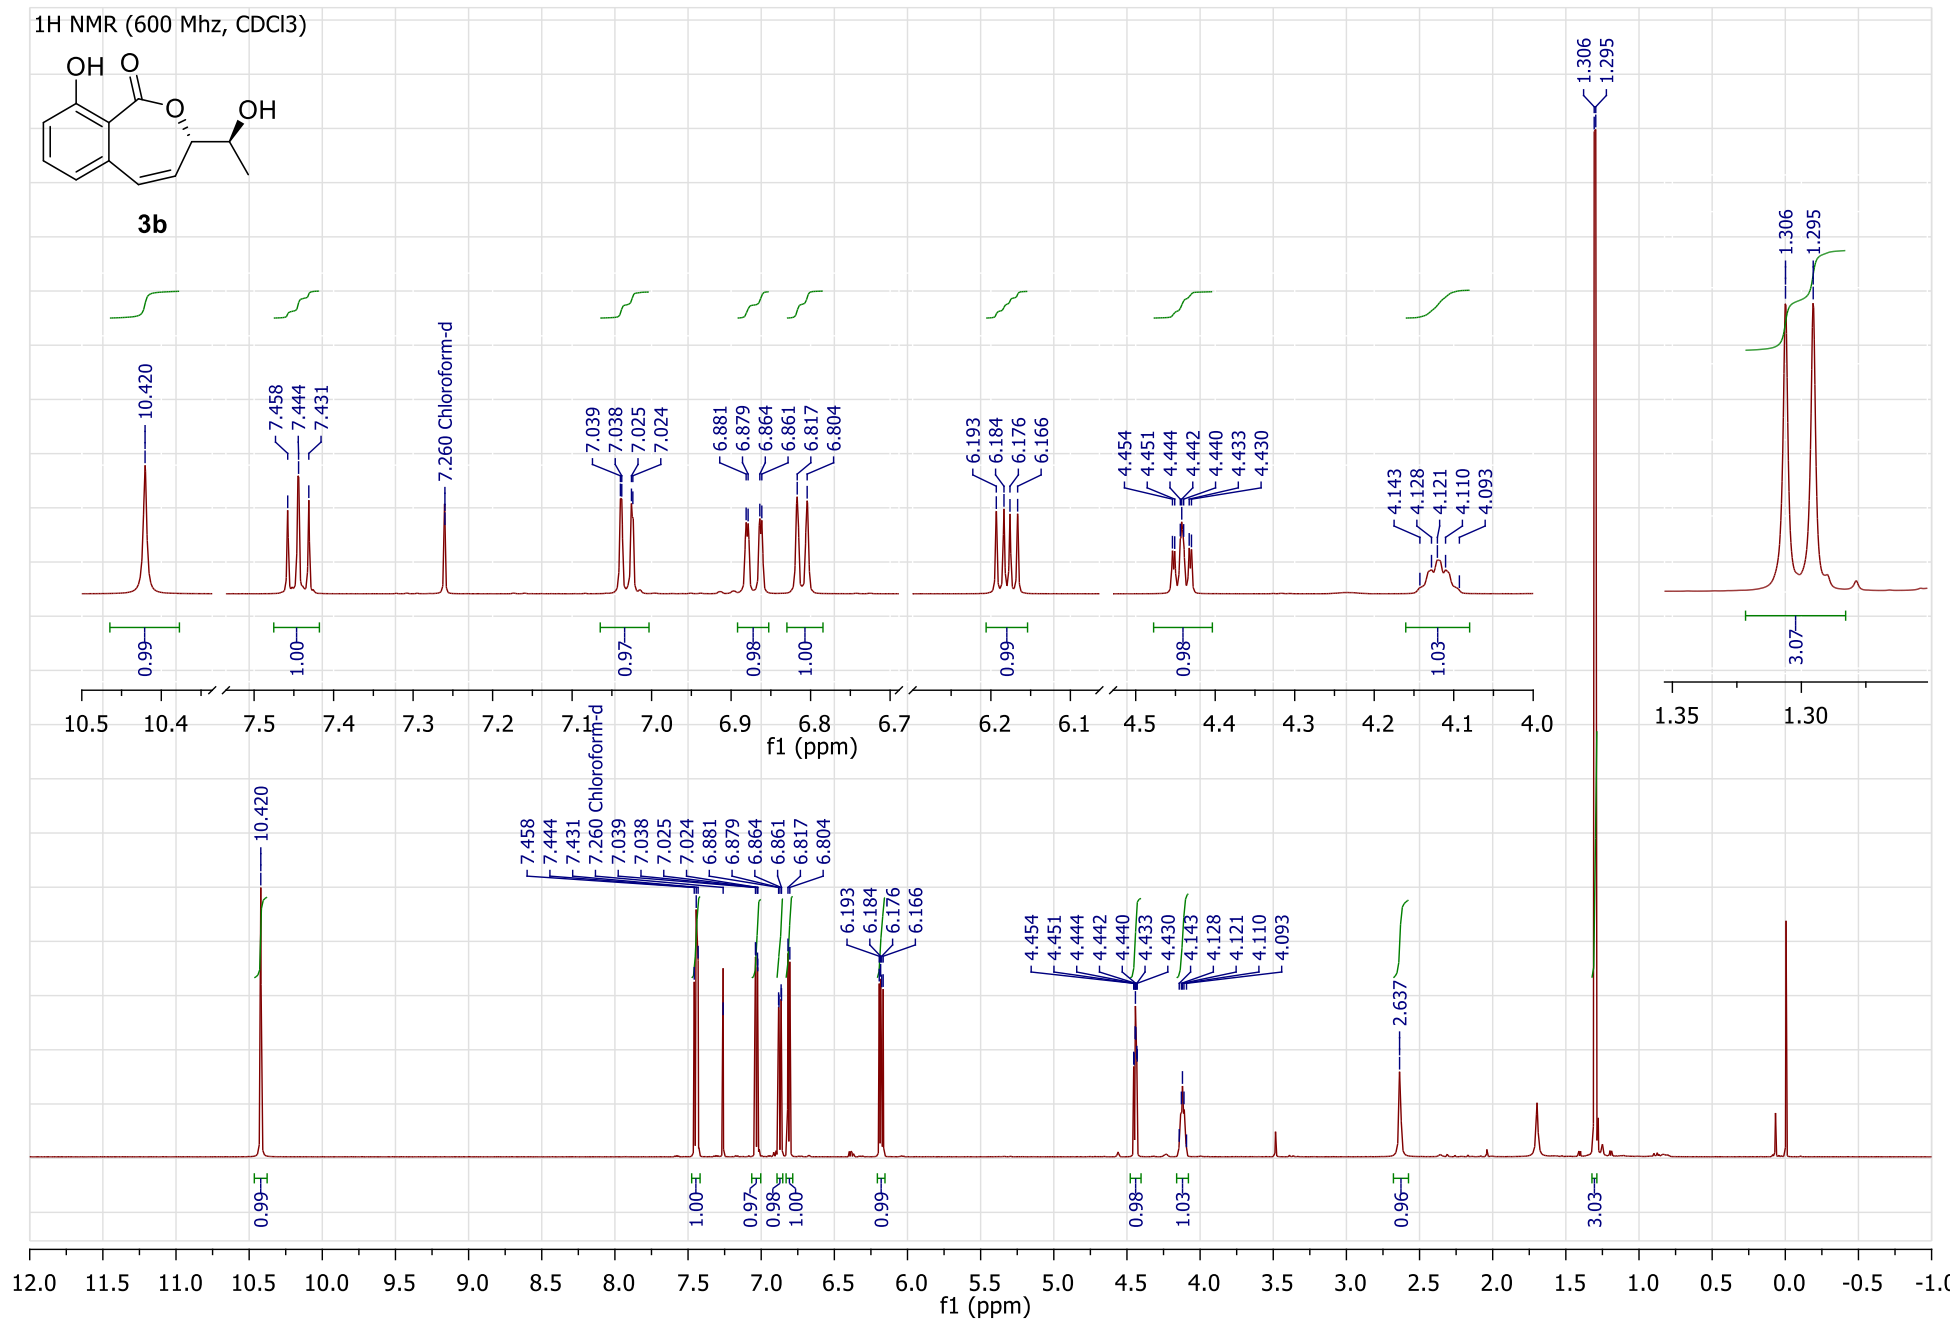

**Figure S58.** <sup>1</sup>H NMR spectrum of **3b** in CDCl<sub>3</sub>.

$^{13}\text{C}\{^1\text{H}\}$  NMR (151 Mhz,  $\text{CDCl}_3$ )

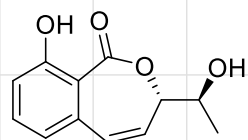

**3b**

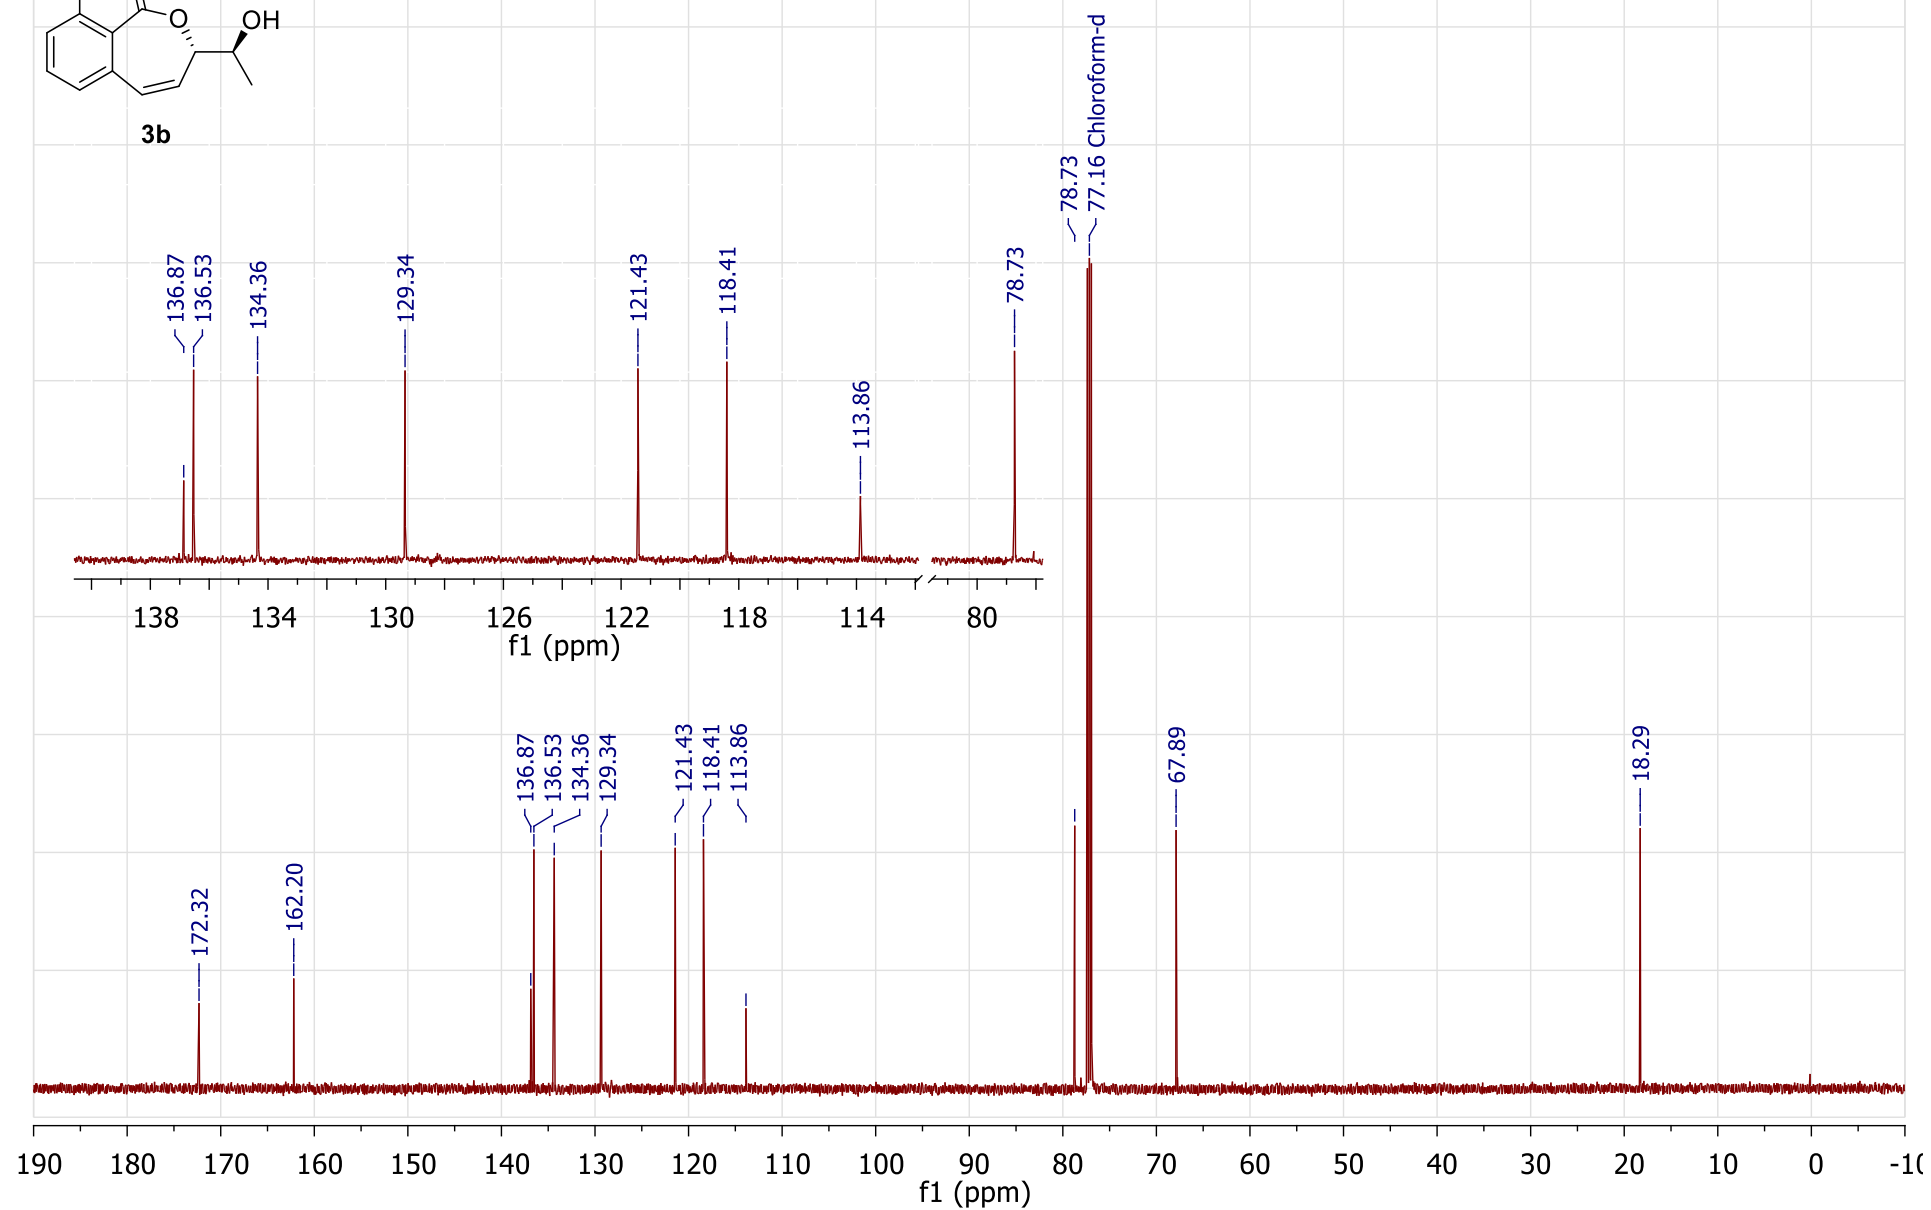

**Figure S59.**  $^{13}\text{C}$  NMR spectrum of **3b** in  $\text{CDCl}_3$ .

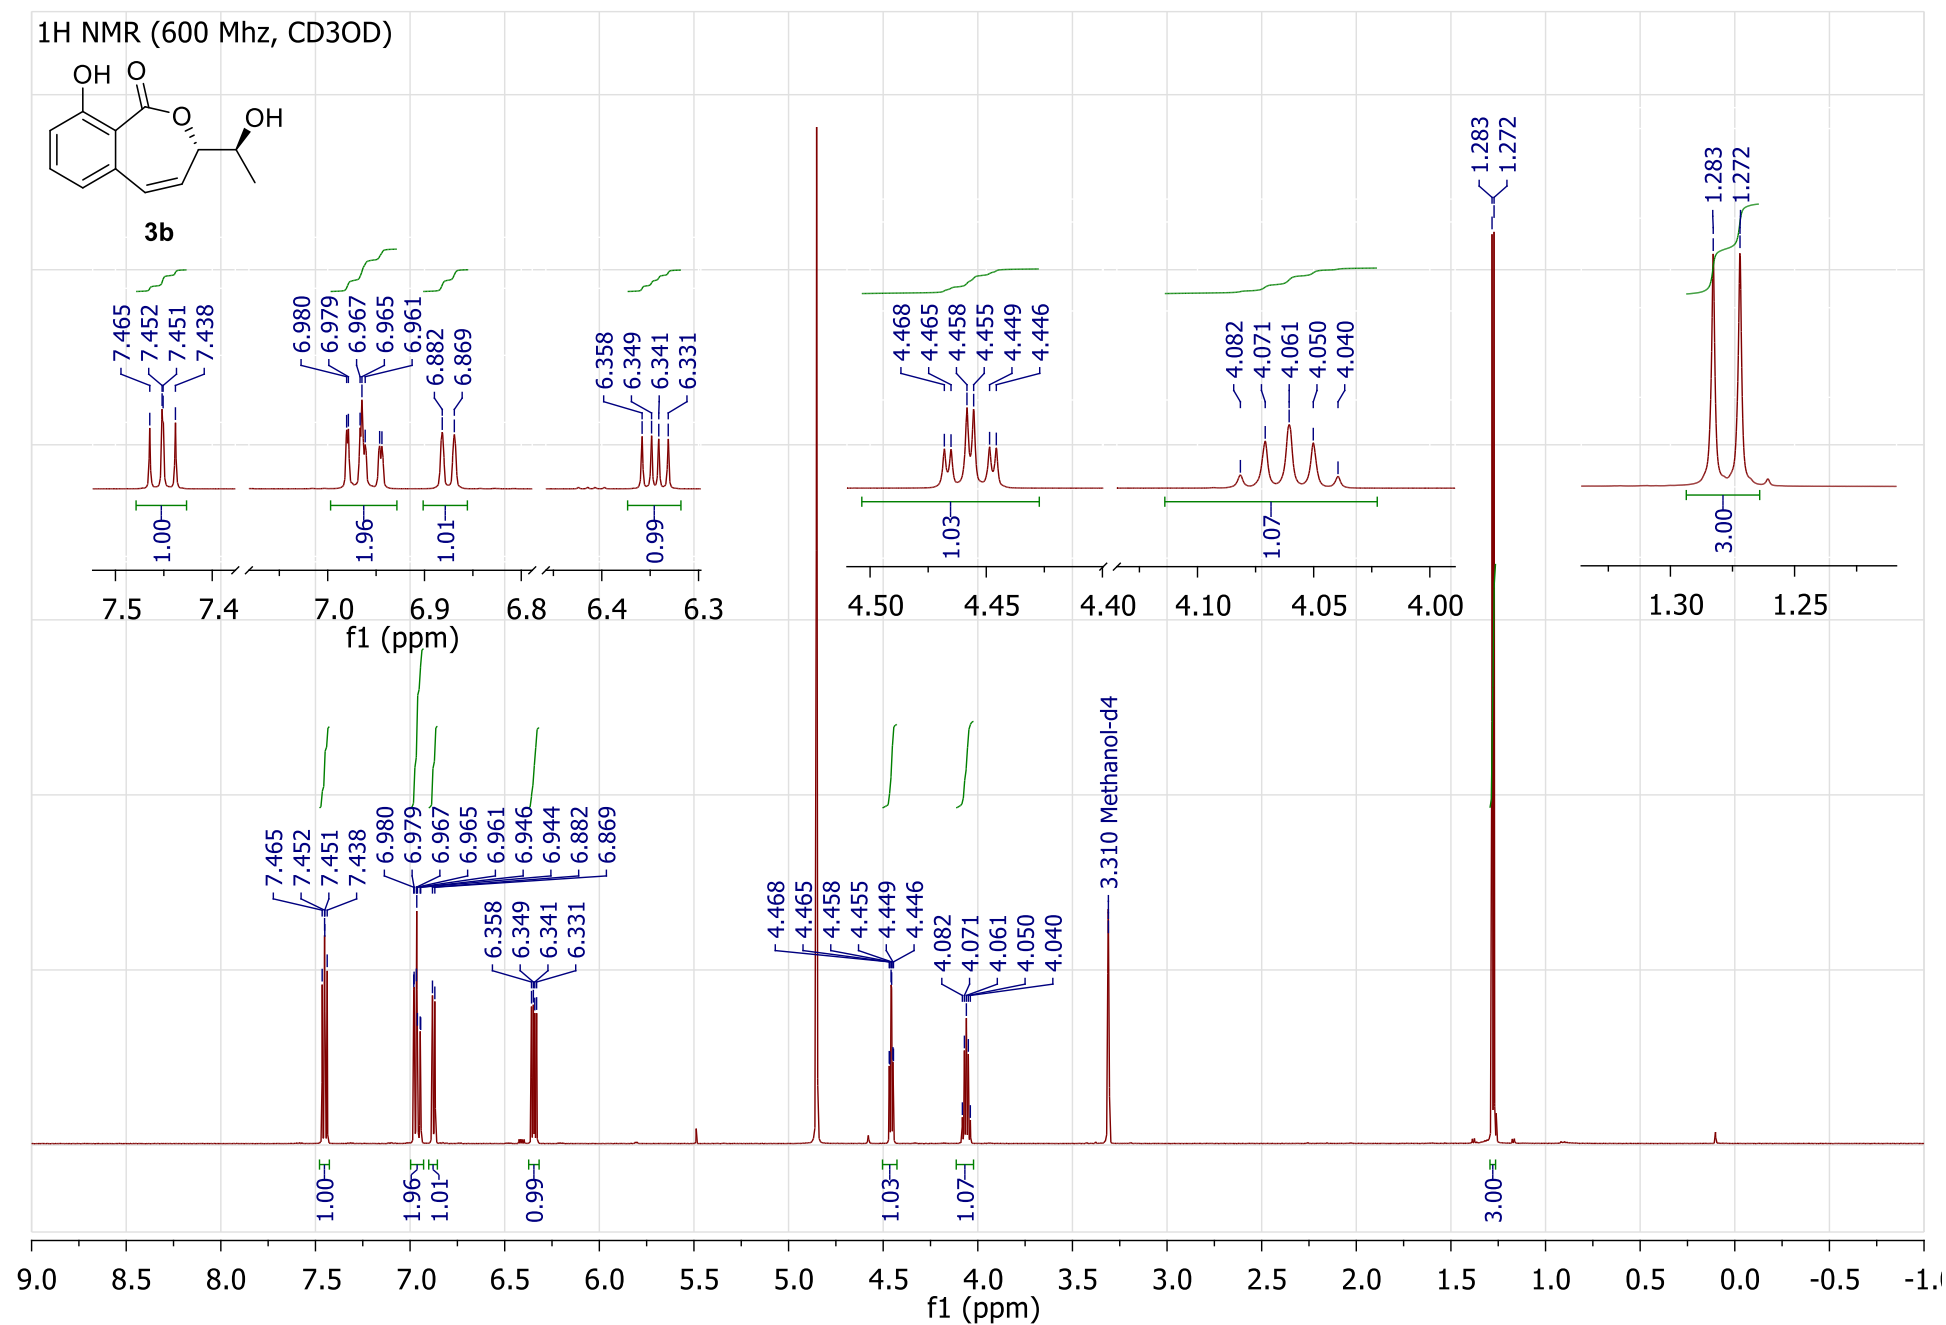

**Figure S60.** <sup>1</sup>H NMR spectrum of **3b** in CD<sub>3</sub>OD.

$^{13}\text{C}\{^1\text{H}\}$  NMR (151 Mhz,  $\text{CD}_3\text{OD}$ )

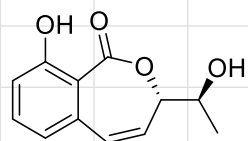

**3b**

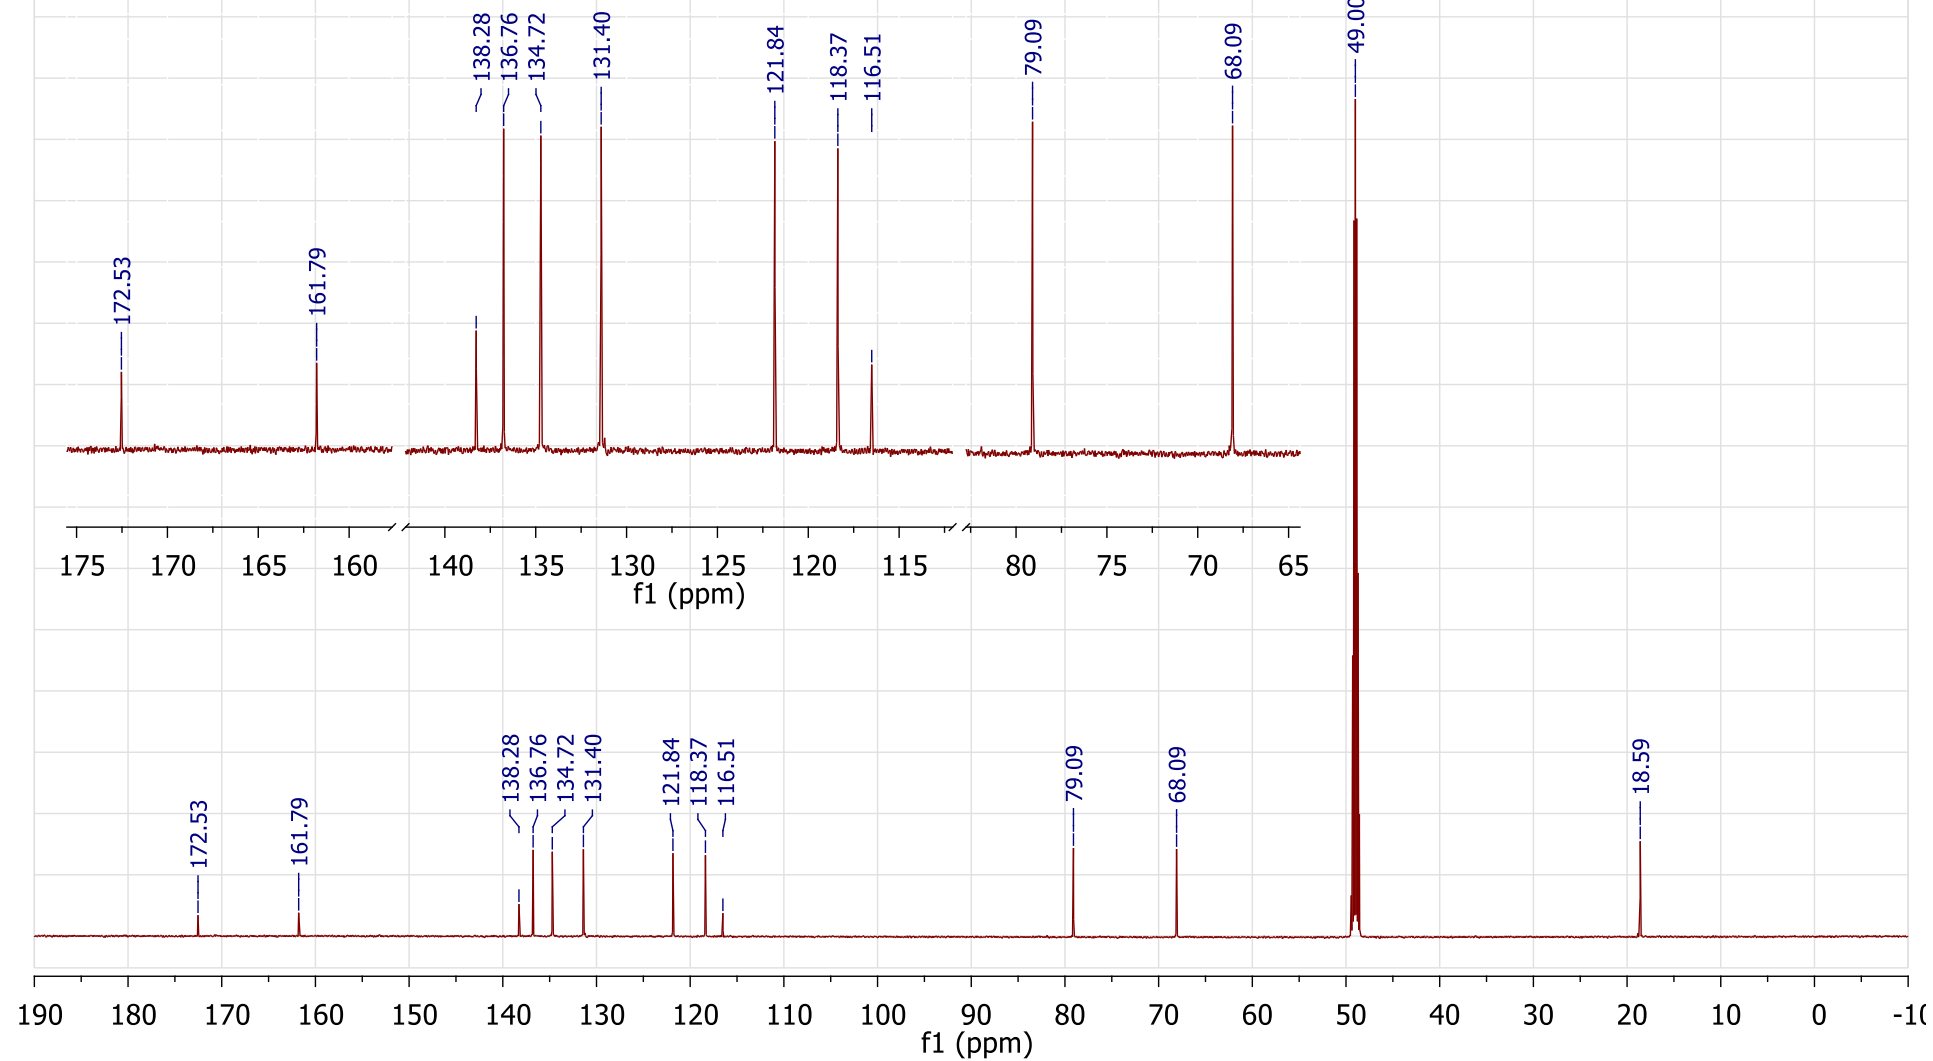

**Figure S61.**  $^{13}\text{C}$  NMR spectrum of **3b** in  $\text{CD}_3\text{OD}$ .

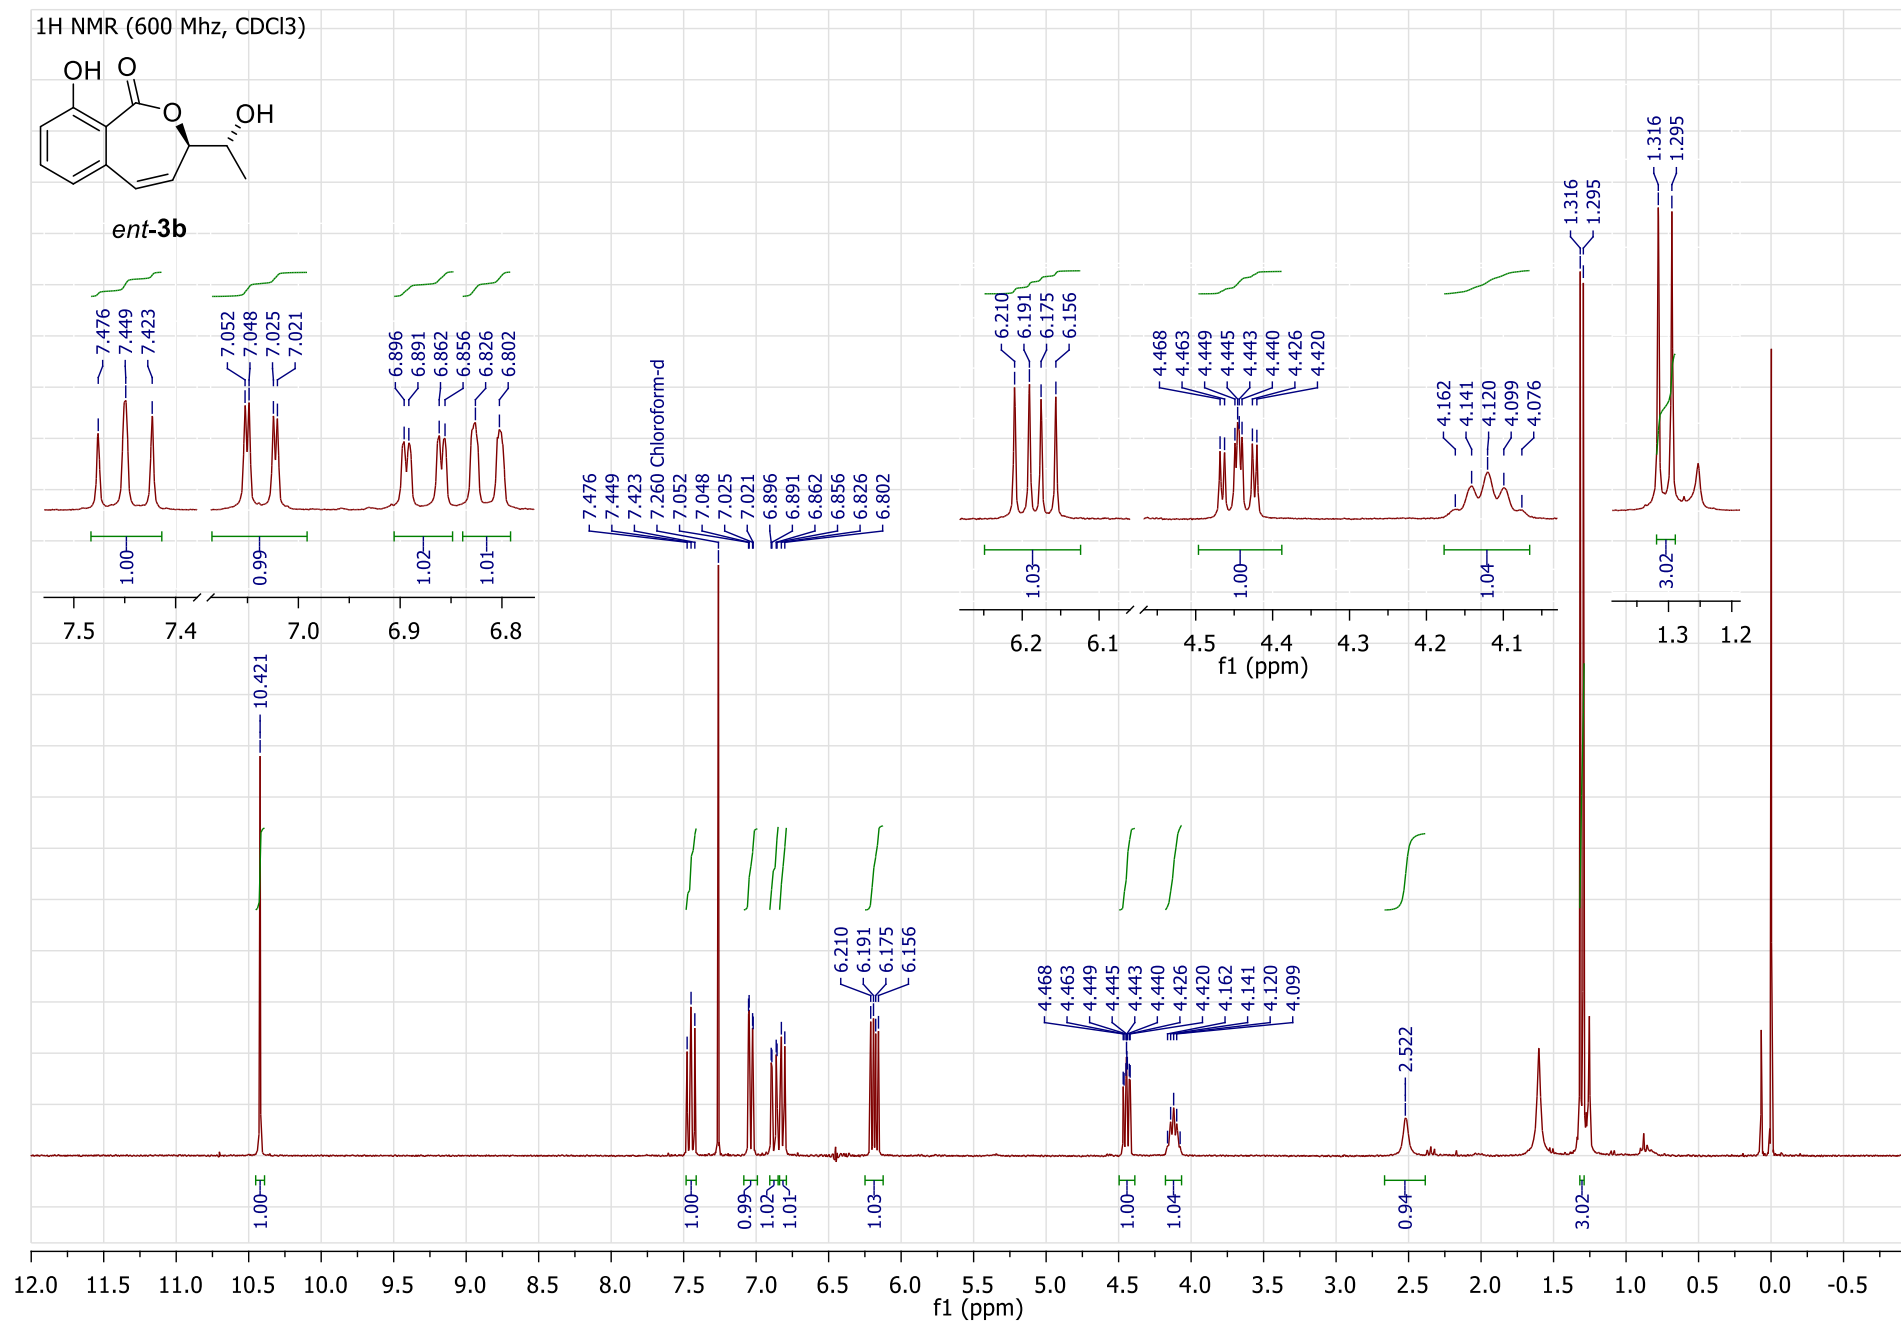

**Figure S62.** <sup>1</sup>H NMR spectrum of **ent-3b** in CDCl<sub>3</sub>.

$^{13}\text{C}\{^1\text{H}\}$  NMR (151 Mhz,  $\text{CDCl}_3$ )

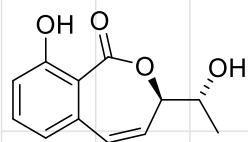

*ent*-**3b**

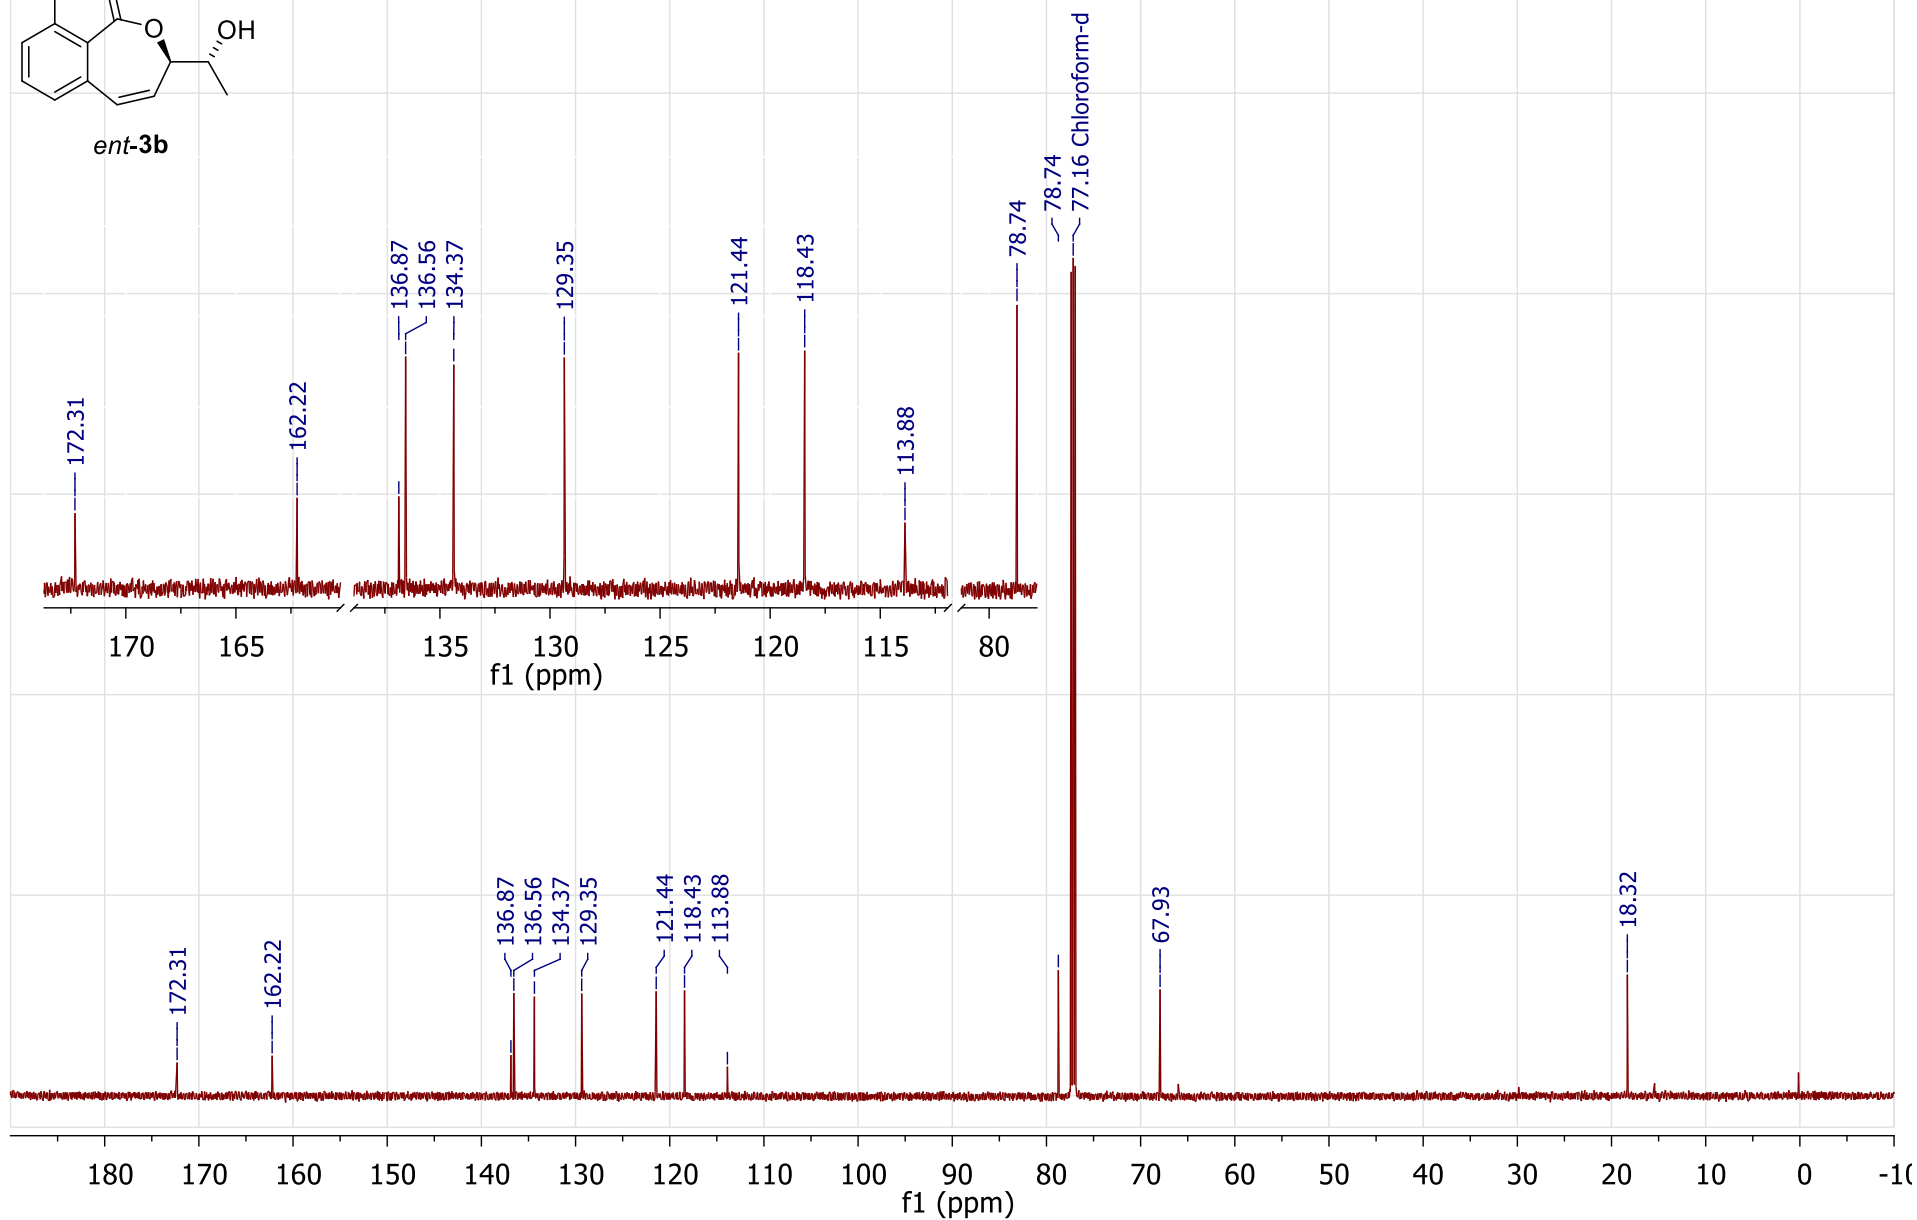

**Figure S63.**  $^{13}\text{C}$  NMR spectrum of *ent*-**3b** in  $\text{CDCl}_3$ .



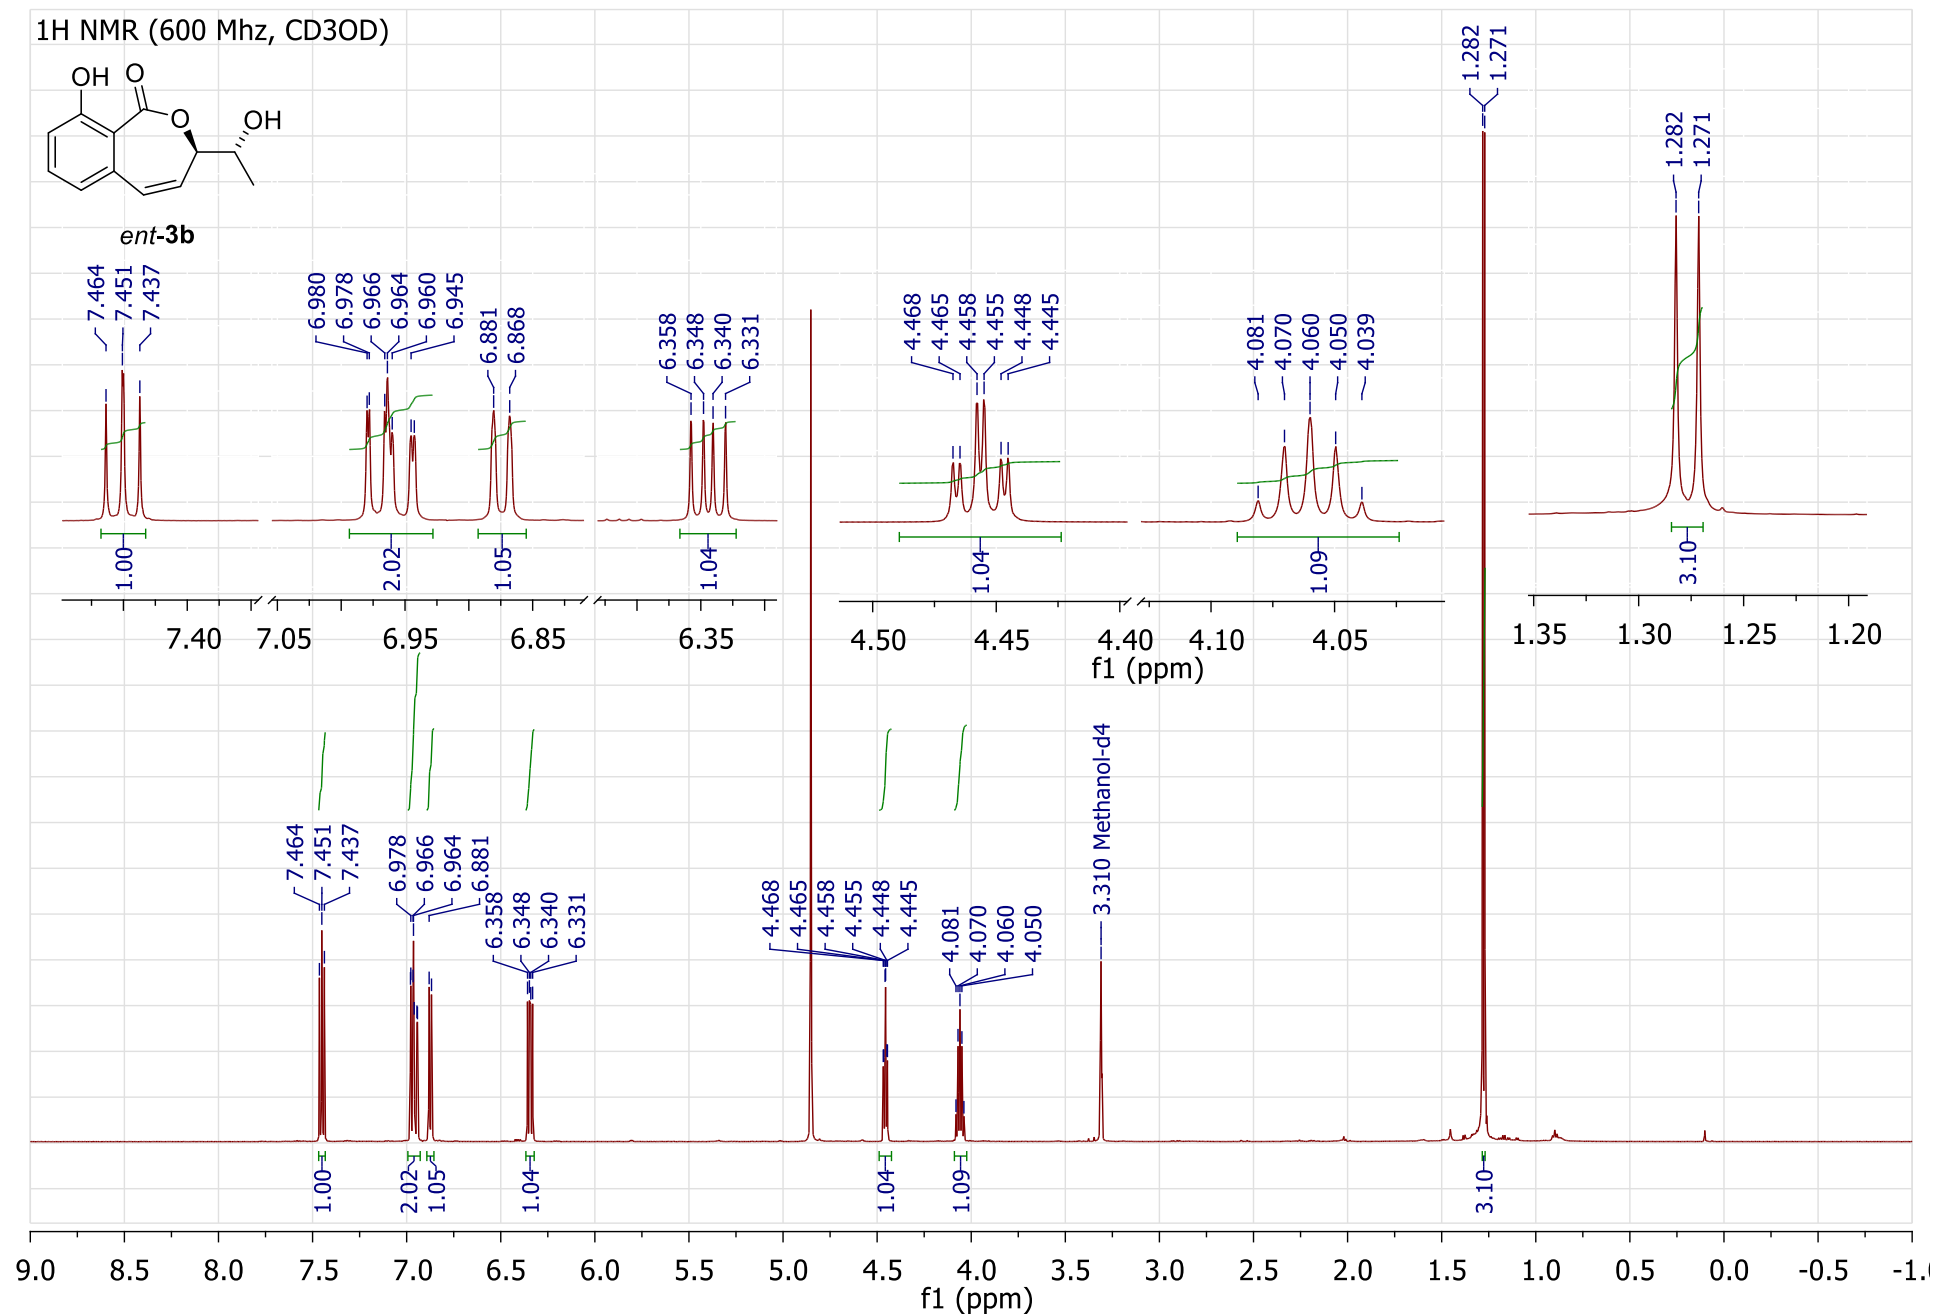

Figure S64. <sup>1</sup>H NMR spectrum of *ent-3b* in CD<sub>3</sub>OD.

$^{13}\text{C}\{^1\text{H}\}$  NMR (151 Mhz,  $\text{CD}_3\text{OD}$ )

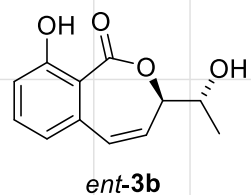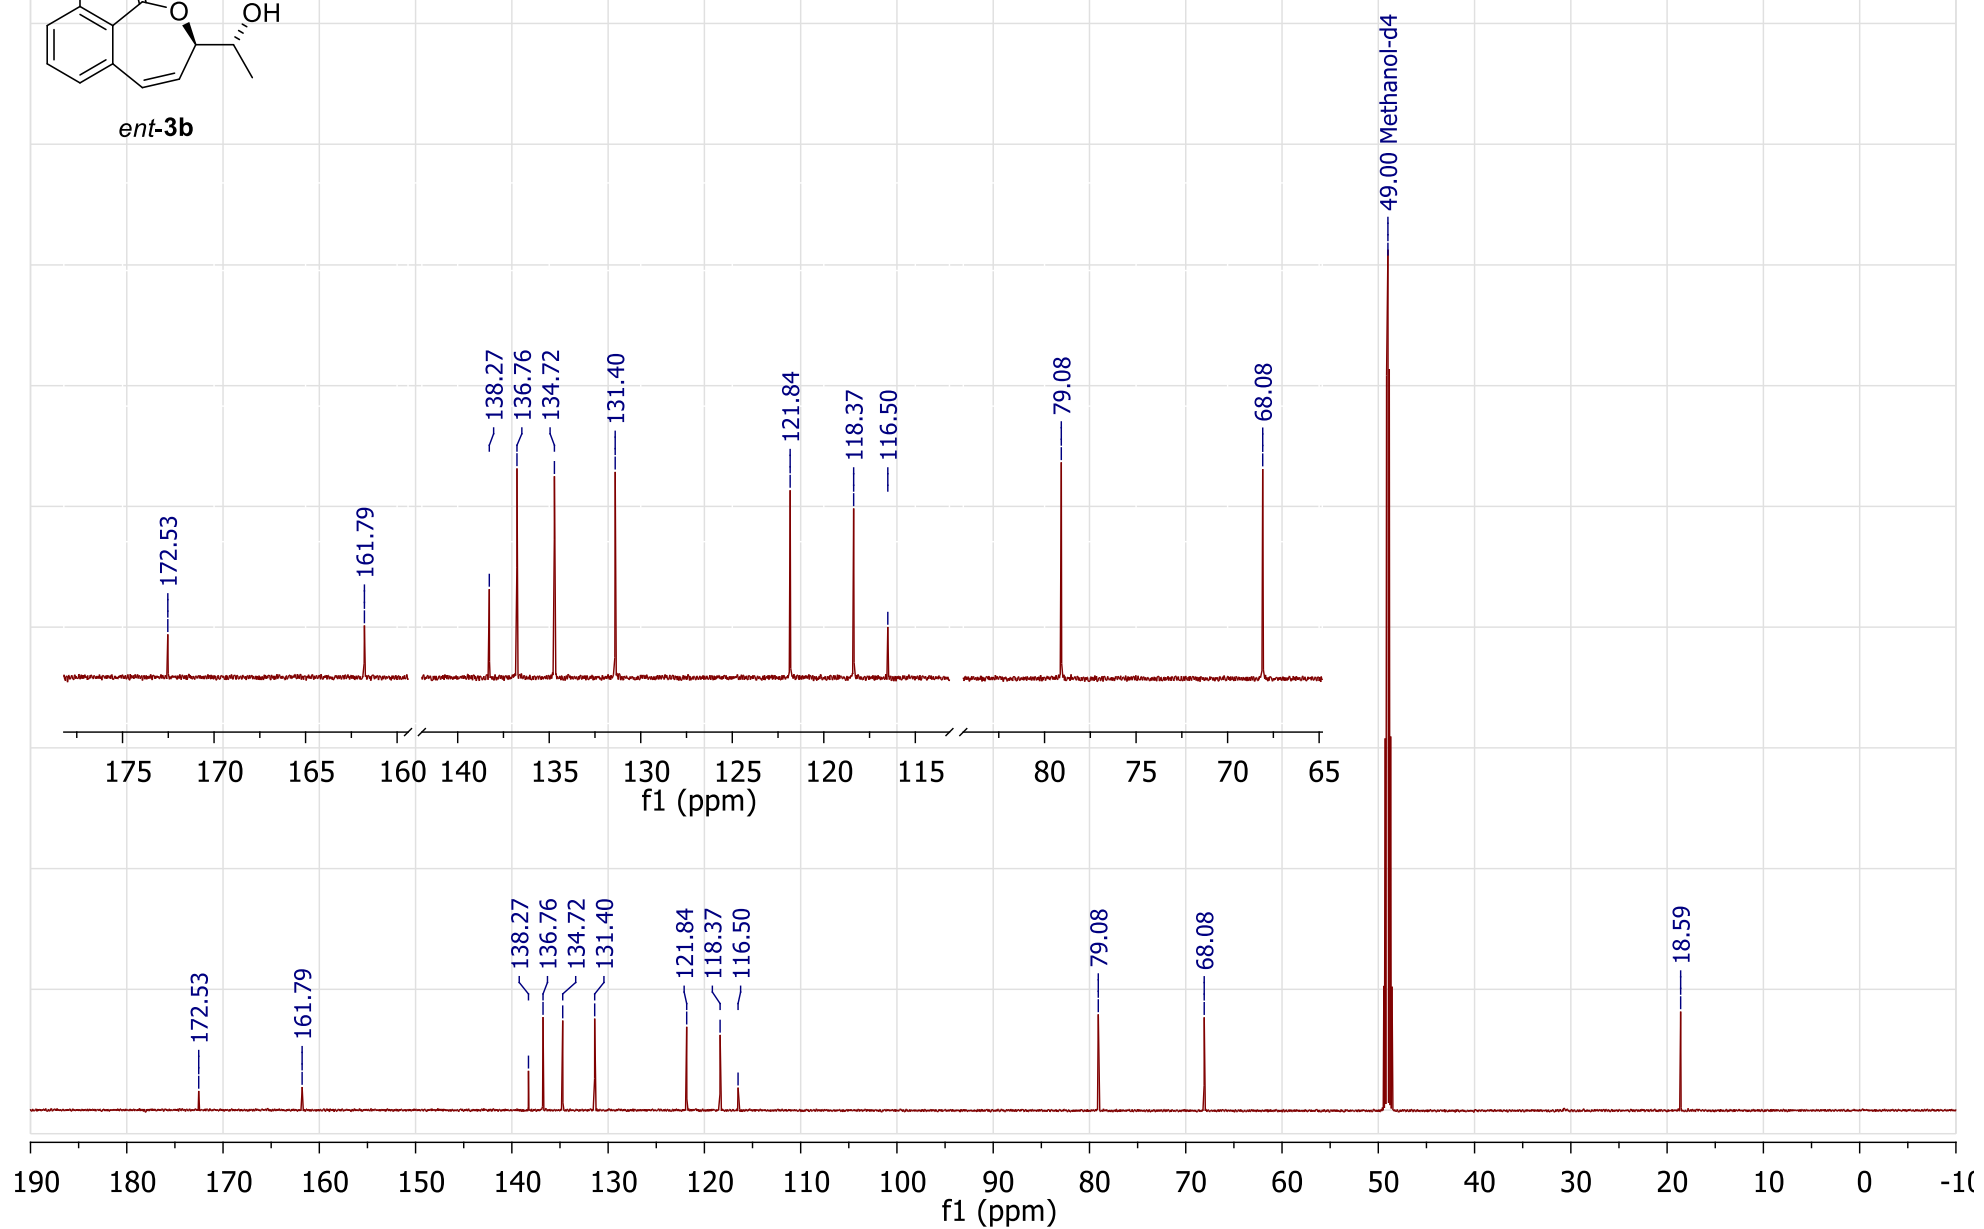

**Figure S65.**  $^{13}\text{C}$  NMR spectrum of *ent-3b* in  $\text{CD}_3\text{OD}$ .

<sup>1</sup>H NMR (400 MHz, CD<sub>3</sub>OD)

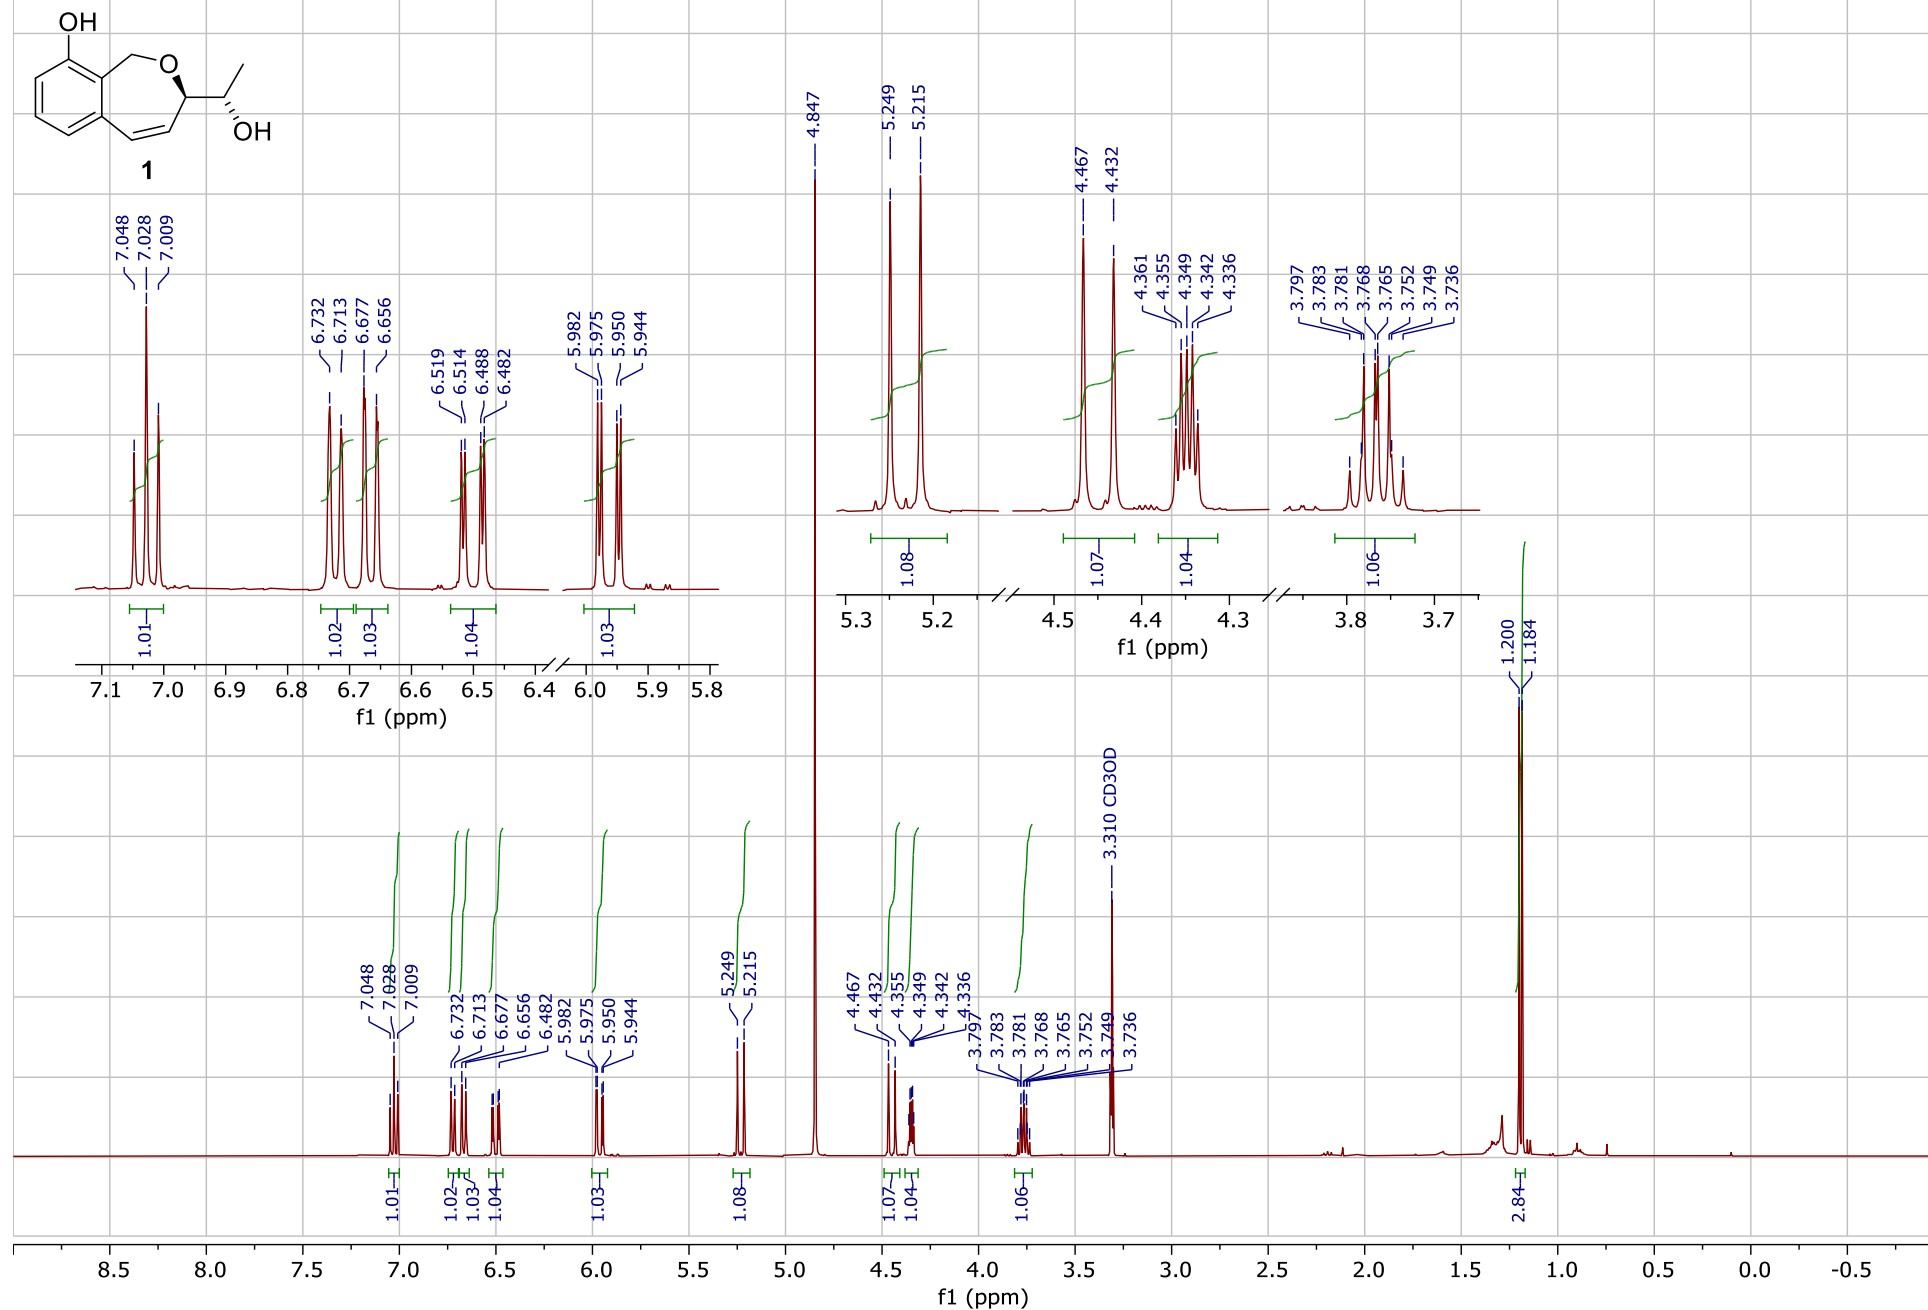

Figure S66. <sup>1</sup>H NMR spectrum of **1**.

$^{13}\text{C}\{^1\text{H}\}$  NMR (100 MHz,  $\text{CD}_3\text{OD}$ )

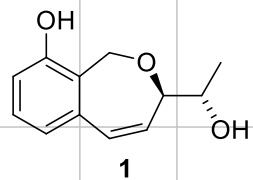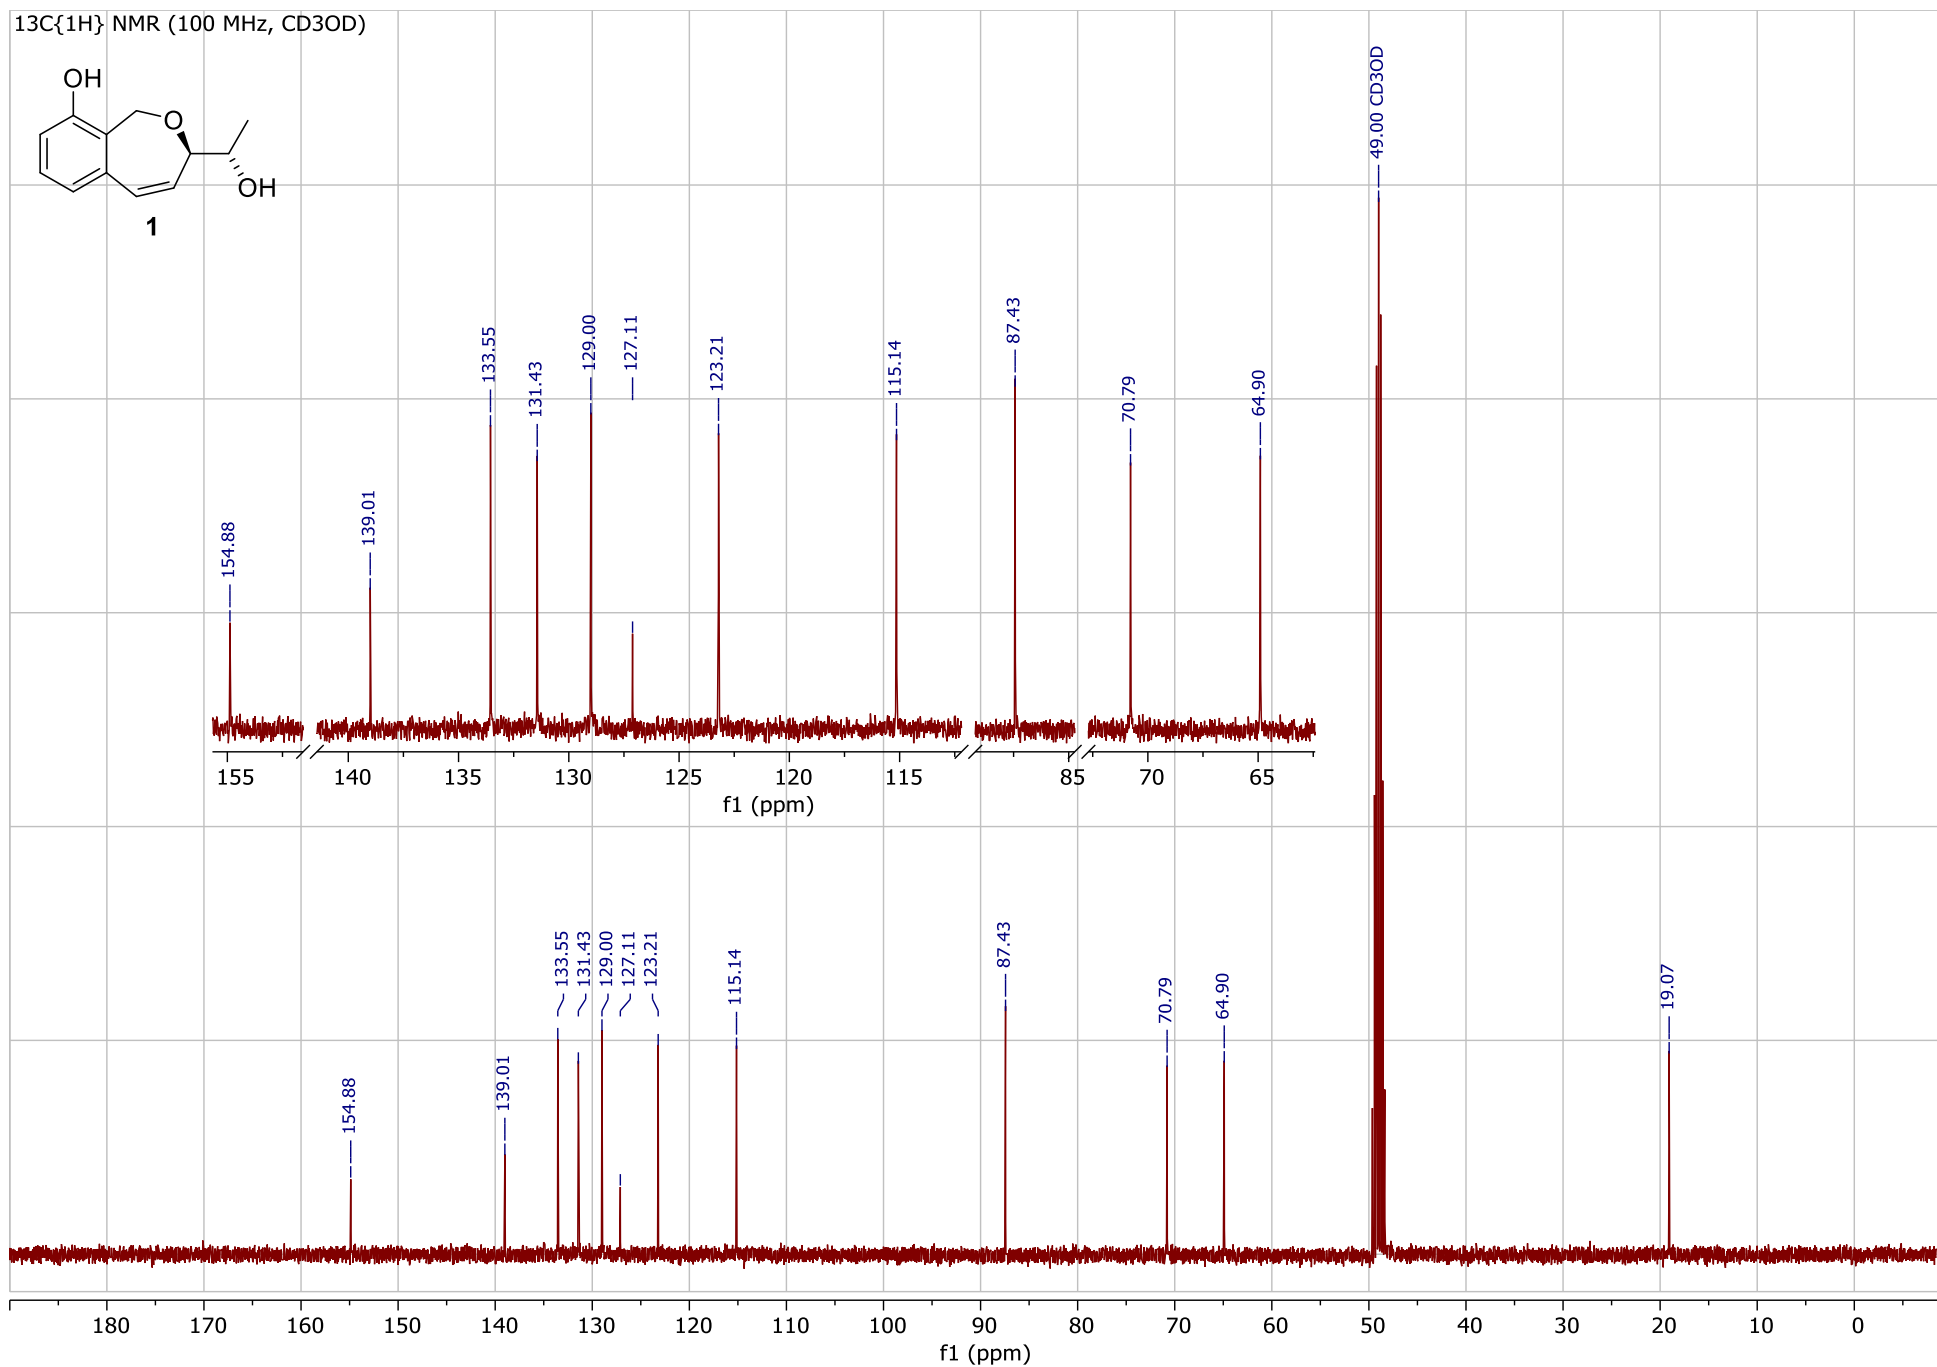

**Figure S67.**  $^{13}\text{C}$  NMR spectrum of **1**.

<sup>1</sup>H NMR (400 MHz, CD<sub>3</sub>OD)

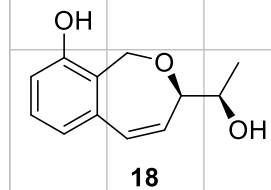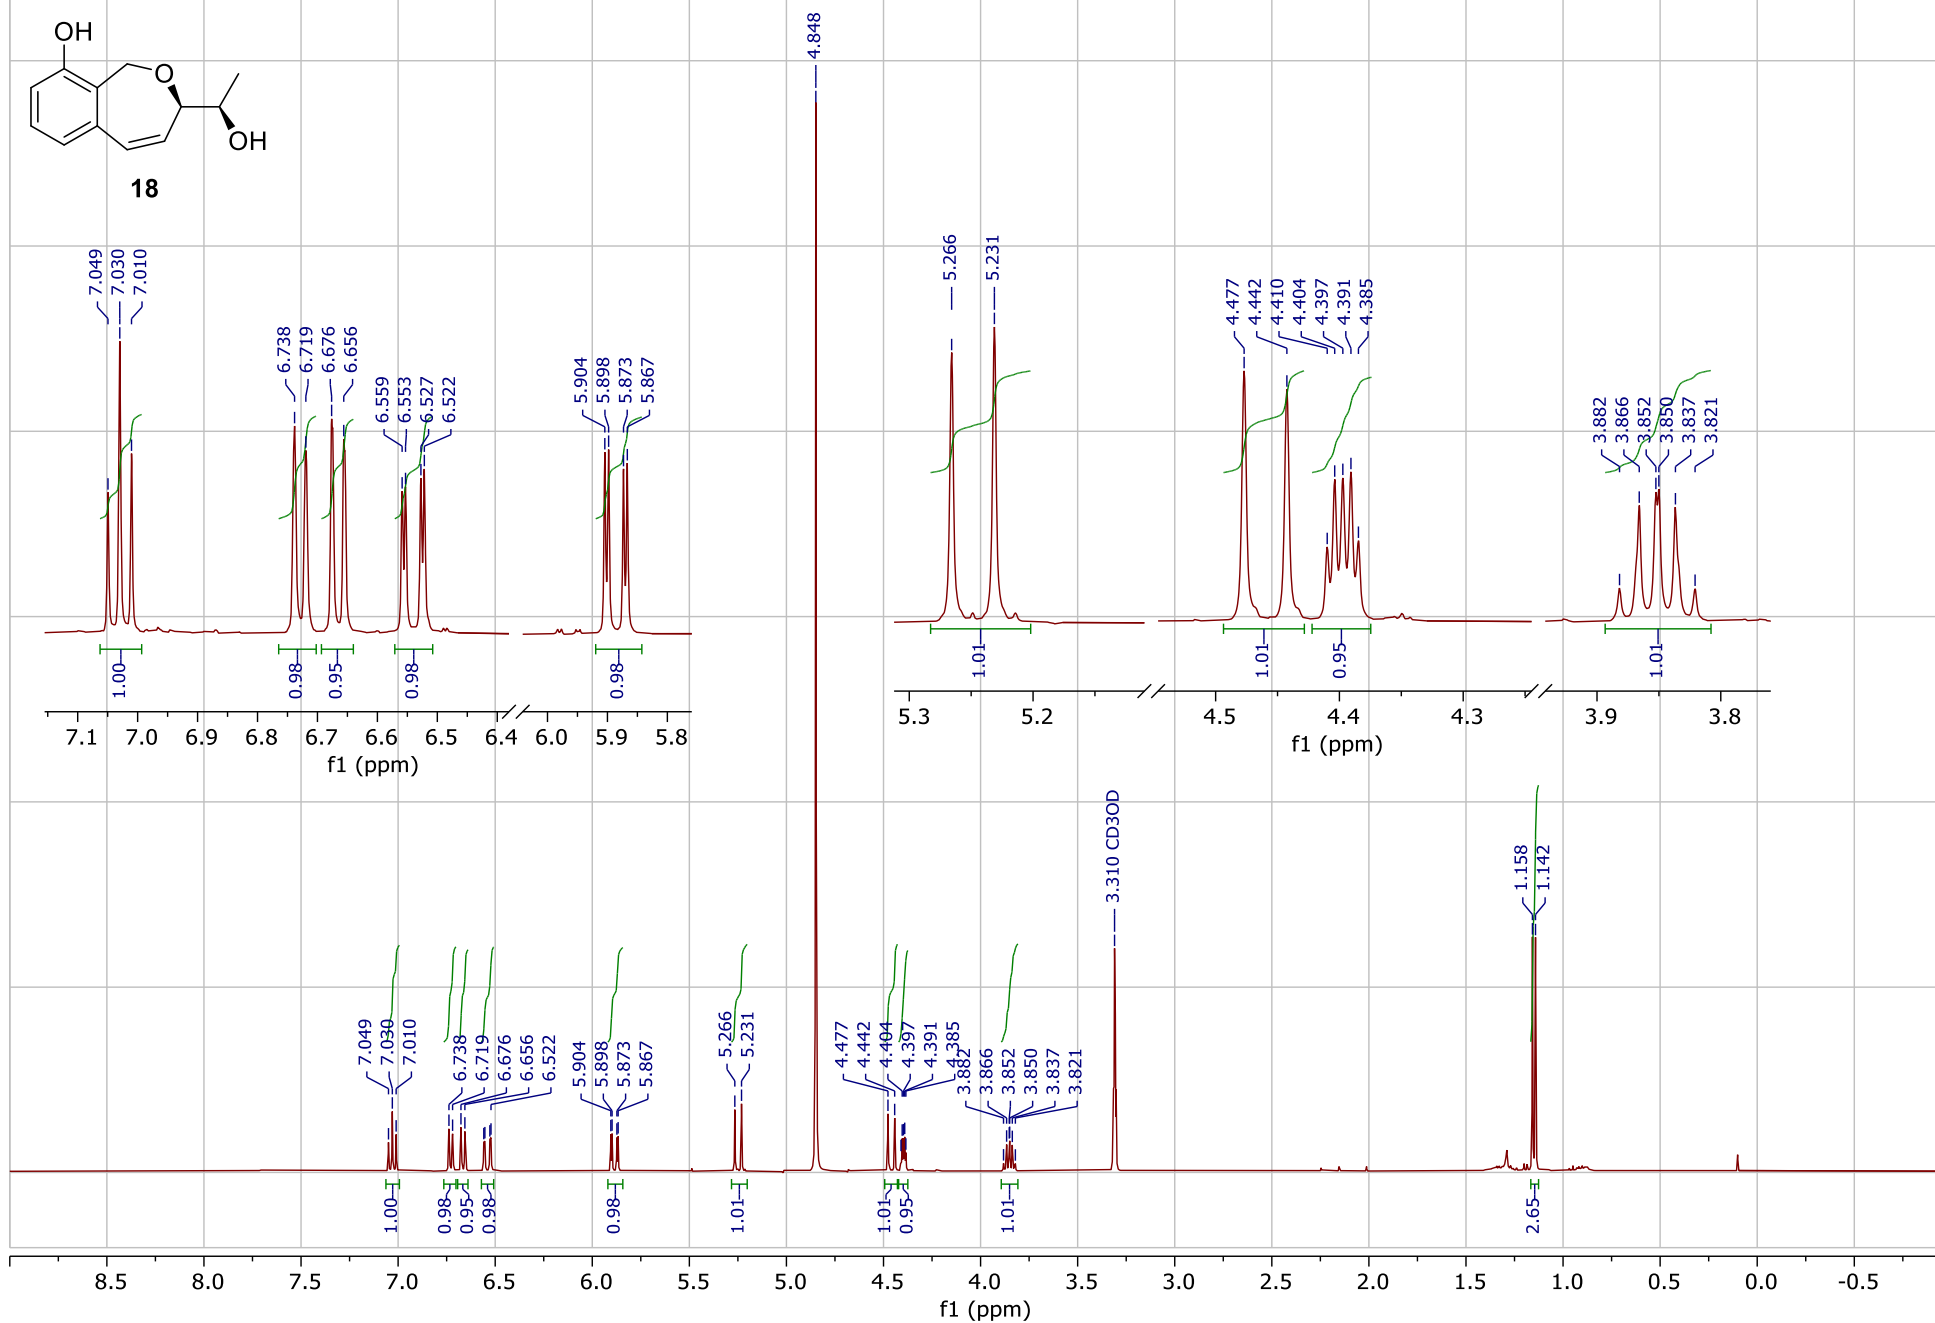

Figure S68. <sup>1</sup>H, NMR spectrum of **18**.

$^{13}\text{C}\{^1\text{H}\}$  NMR (100 MHz,  $\text{CD}_3\text{OD}$ )

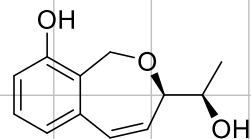

**18**

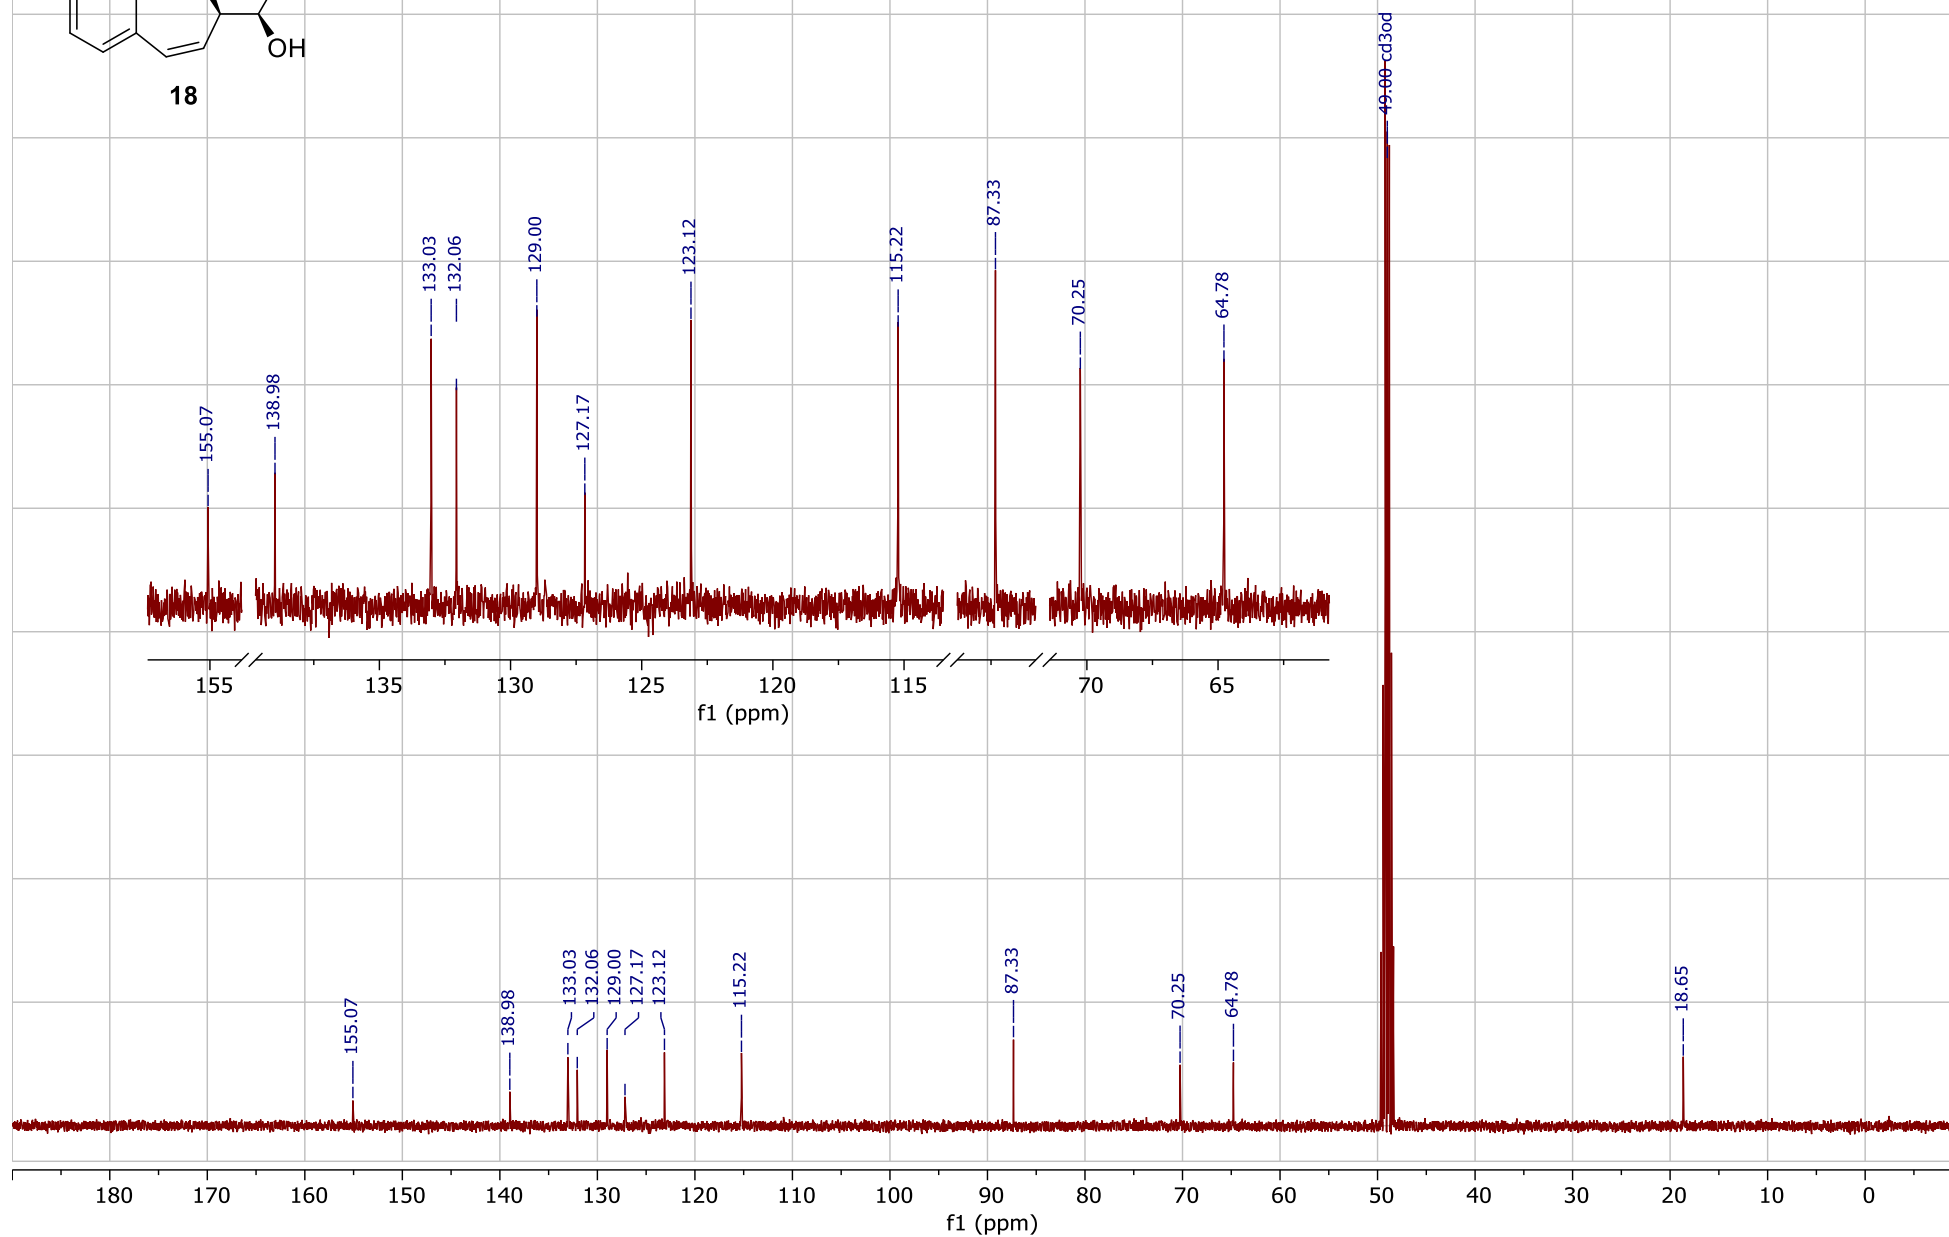

**Figure S69.**  $^{13}\text{C}$  NMR spectrum of **18**.

### *HPLC Analytical method*

Enantiomeric excesses were determined by HPLC (Agilent Technologies) using Chiralpak IC column (Daicel Chiral Technologies, dimensions 4.6 Ø x 250 mm, particle size 5 µm) using *n*-hexane/propan-2-ol (isocratic 90/10) as a mobile phase and detected by UV at 254 nm.

UV detector: 254 nm

Sample injection: 12 µL (C = 1mg/mL)

Isocratic 90/10 *n*-hexane/*i*PrOH

Flow rate: 0.6 mL/min

CHIRALPAK® IC

Retention times:     **3a** 45.8 min, *ent*-**3a** 49.2 min,  
                              **3b** 42.5 min, *ent*-**3b** 35.8 min.

```
=====
Acq. Operator   : tomas
Acq. Instrument : Instrument 1                Location :   -
Injection Date  : 1/18/2023 2:36:19 AM
Acq. Method     : C:\CHEM32\1\METHODS\ROBO.M
Last changed    : 1/18/2023 2:23:18 AM by tomas
                  (modified after loading)
Analysis Method : C:\CHEM32\1\METHODS\ROBO.M
Last changed    : 1/19/2023 2:16:41 AM by tomas
                  (modified after loading)
Additional Info : Peak(s) manually integrated
```

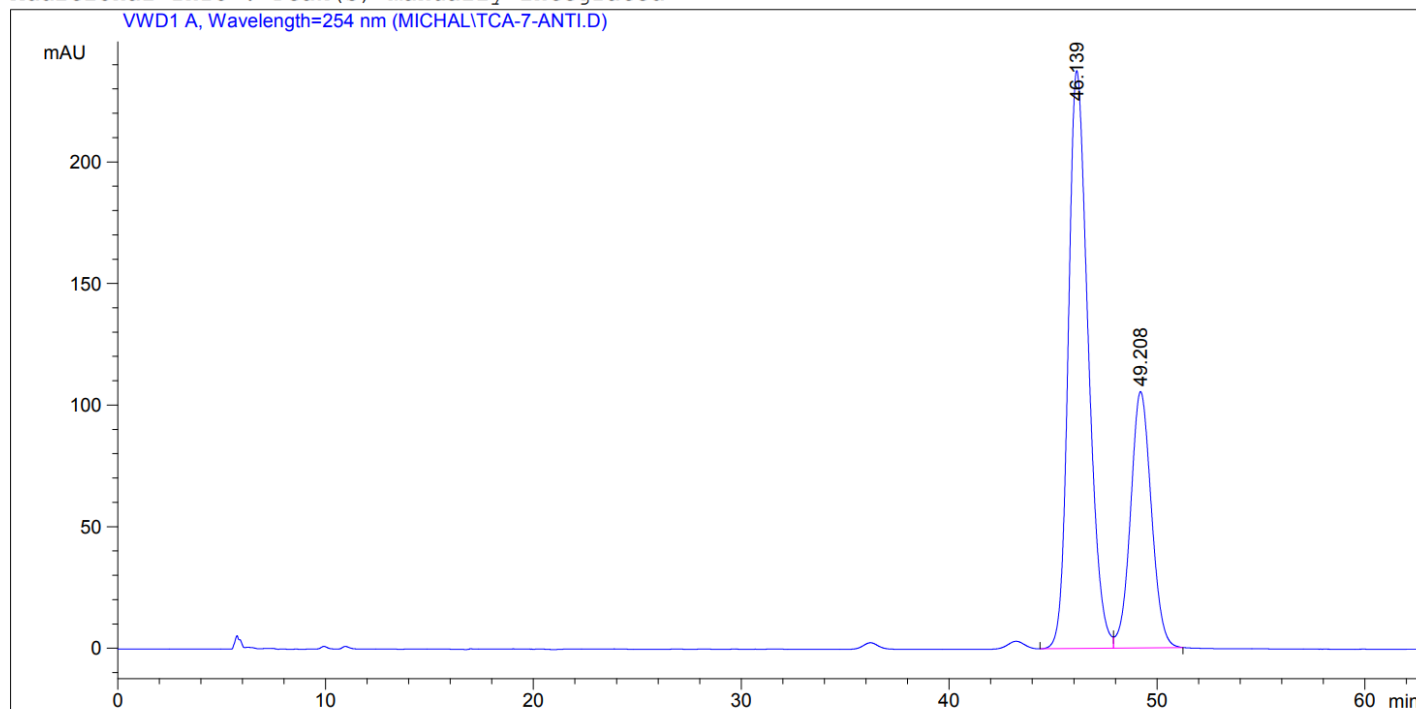

=====  
Area Percent Report  
=====

```
Sorted By      :      Signal
Multiplier:    :      1.0000
Dilution:      :      1.0000
Use Multiplier & Dilution Factor with ISTDs
```

Signal 1: VWD1 A, Wavelength=254 nm

| Peak # | RetTime [min] | Type | Width [min] | Area mAU *s | Height [mAU] | Area %  |
|--------|---------------|------|-------------|-------------|--------------|---------|
| 1      | 46.139        | VV   | 1.0138      | 1.57859e4   | 237.63568    | 68.2822 |
| 2      | 49.208        | VB   | 1.0617      | 7332.72803  | 105.44589    | 31.7178 |

Totals :                      2.31187e4    343.08157

=====  
\*\*\* End of Report \*\*\*

**Figure S70.** HPLC analysis of a mixture of 3a and ent-3a.



=====

Acq. Operator : tomas  
Acq. Instrument : Instrument 1 Location : -  
Injection Date : 1/18/2023 3:44:19 AM  
Acq. Method : C:\CHEM32\1\METHODS\ROBO.M  
Last changed : 1/18/2023 3:39:17 AM by tomas  
(modified after loading)  
Analysis Method : C:\CHEM32\1\METHODS\ROBO.M  
Last changed : 1/19/2023 2:16:41 AM by tomas  
(modified after loading)  
Additional Info : Peak(s) manually integrated

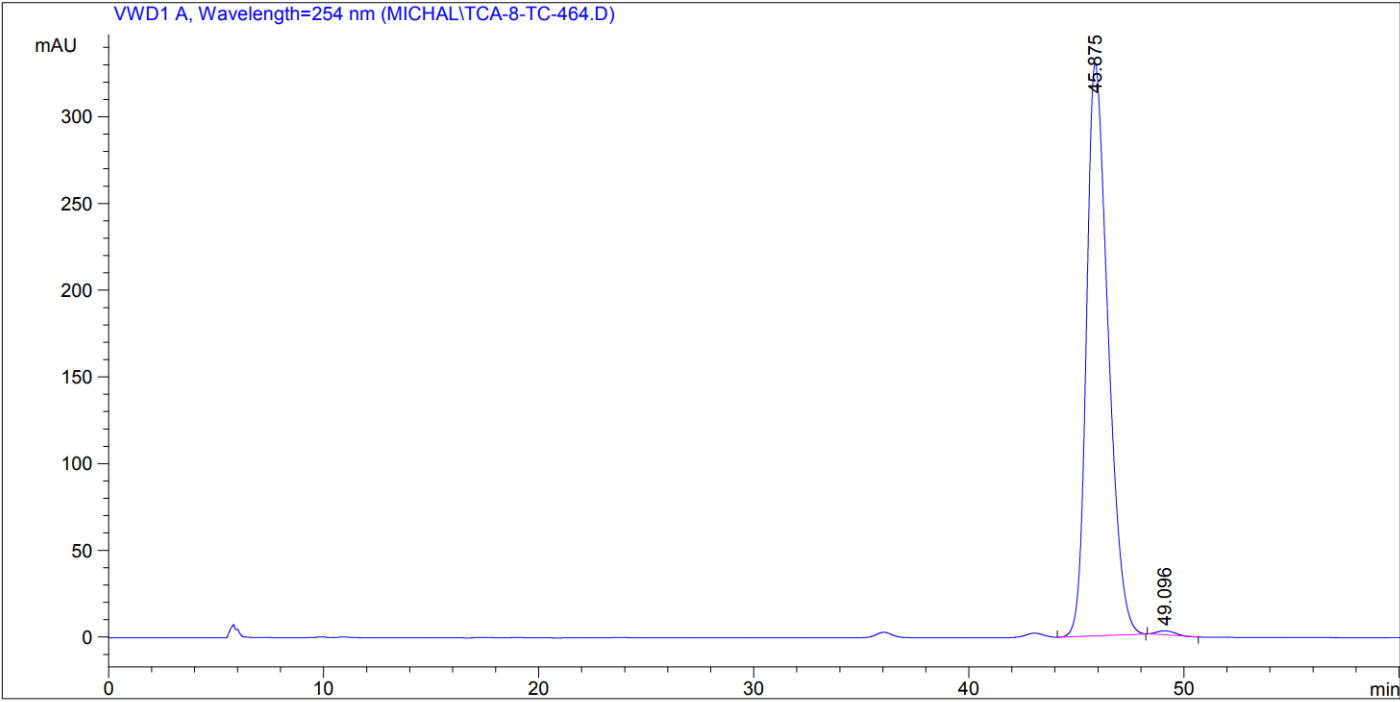

=====

Area Percent Report

=====

Sorted By : Signal  
Multiplier: : 1.0000  
Dilution: : 1.0000  
Use Multiplier & Dilution Factor with ISTDs

Signal 1: VWD1 A, Wavelength=254 nm

| Peak # | RetTime [min] | Type | Width [min] | Area mAU*s | Height [mAU] | Area %  |
|--------|---------------|------|-------------|------------|--------------|---------|
| 1      | 45.875        | VB   | 1.0570      | 2.29933e4  | 330.19550    | 99.4045 |
| 2      | 49.096        | BB   | 0.6901      | 137.74297  | 2.38924      | 0.5955  |

Totals : 2.31311e4 332.58474

=====

\*\*\* End of Report \*\*\*

Figure S71. HPLC analysis of synthetic 3a.

```
=====
Acq. Operator   : tomas
Acq. Instrument : Instrument 1                Location :   -
Injection Date  : 1/19/2023 2:07:27 AM
Acq. Method     : C:\CHEM32\1\METHODS\ROBO.M
Last changed    : 1/19/2023 2:01:18 AM by tomas
                  (modified after loading)
Analysis Method : C:\CHEM32\1\METHODS\ROBO.M
Last changed    : 1/19/2023 2:16:41 AM by tomas
                  (modified after loading)
Additional Info : Peak(s) manually integrated
=====
```

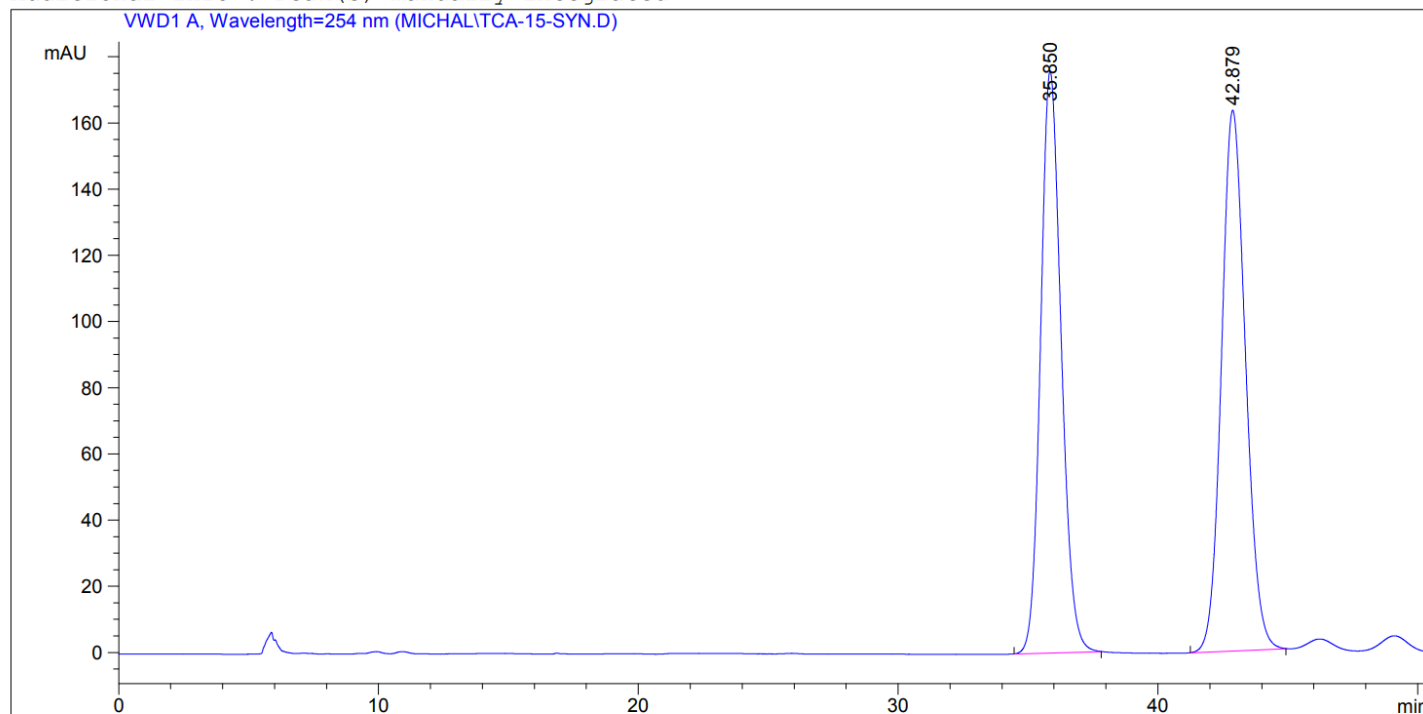

```
=====
                        Area Percent Report
=====
```

```
Sorted By           :      Signal
Multiplier:          :      1.0000
Dilution:            :      1.0000
Use Multiplier & Dilution Factor with ISTDs
```

Signal 1: VWD1 A, Wavelength=254 nm

| Peak # | RetTime [min] | Type | Width [min] | Area mAU *s | Height [mAU] | Area %  |
|--------|---------------|------|-------------|-------------|--------------|---------|
| 1      | 35.850        | BB   | 0.8475      | 9680.69434  | 175.86061    | 47.9545 |
| 2      | 42.879        | BB   | 0.9946      | 1.05066e4   | 163.43764    | 52.0455 |

Totals :                      2.01873e4    339.29825

```
=====
                        *** End of Report ***
=====
```

**Figure S72.** HPLC analysis of racemic mixture of 3b and ent-3b.

```
=====
Acq. Operator   : tomas
Acq. Instrument : Instrument 1                Location :   -
Injection Date  : 1/19/2023 4:16:54 AM
Acq. Method     : C:\CHEM32\1\METHODS\ROBO.M
Last changed    : 1/19/2023 4:12:28 AM by tomas
                  (modified after loading)
Analysis Method : C:\CHEM32\1\METHODS\ROBO.M
Last changed    : 1/19/2023 2:16:41 AM by tomas
                  (modified after loading)
Additional Info : Peak(s) manually integrated
=====
```

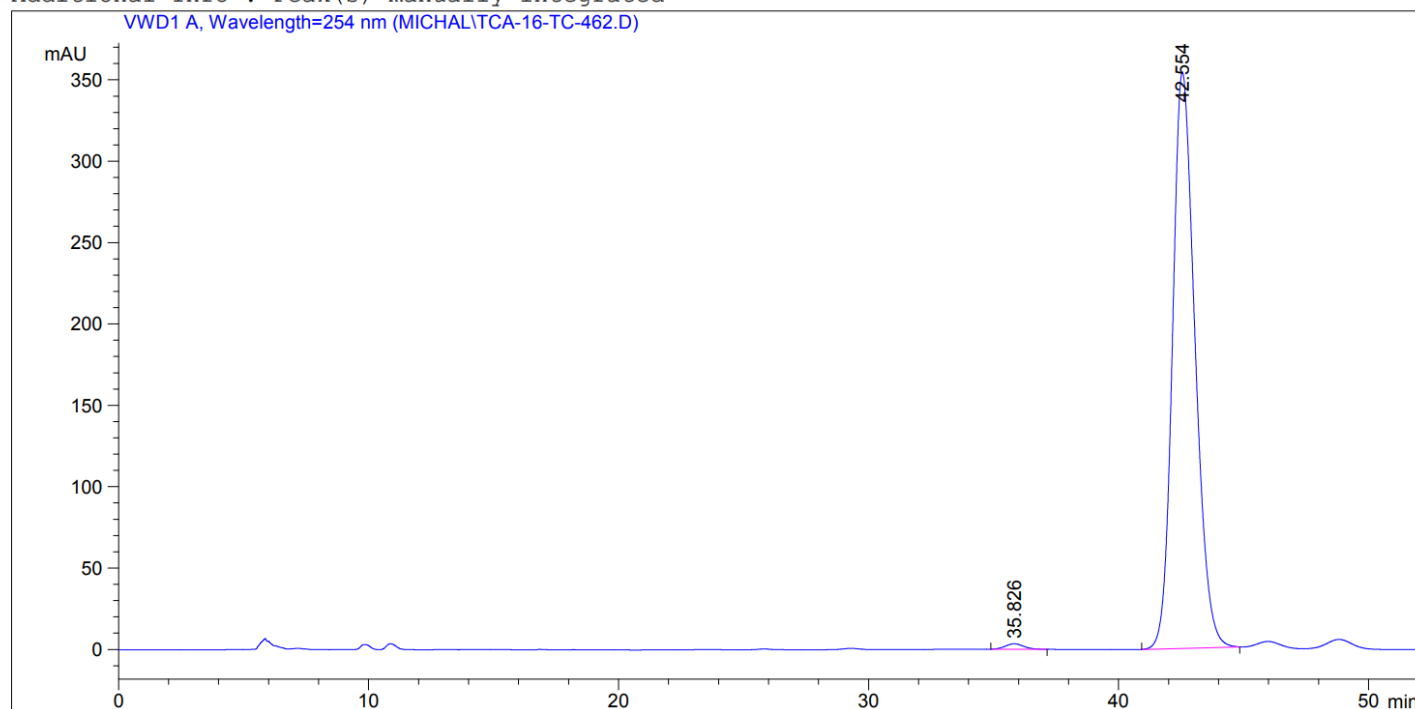

```
=====
                        Area Percent Report
=====
```

```
Sorted By          :      Signal
Multiplier:         :      1.0000
Dilution:           :      1.0000
Use Multiplier & Dilution Factor with ISTDs
```

Signal 1: VWD1 A, Wavelength=254 nm

| Peak # | RetTime [min] | Type | Width [min] | Area mAU *s | Height [mAU] | Area %  |
|--------|---------------|------|-------------|-------------|--------------|---------|
| 1      | 35.826        | BB   | 0.7033      | 174.66859   | 3.36409      | 0.7843  |
| 2      | 42.554        | BB   | 0.9578      | 2.20968e4   | 354.25656    | 99.2157 |

Totals :                      2.22715e4    357.62065

```
=====
*** End of Report ***
=====
```

**Figure S73.** HPLC analysis of synthetic 3b.
